# Supplementary material for: Scalable Generation of Nanovesicles from Human-Induced Pluripotent Stem Cells for Cardiac Repair
Source: Int J Mol Sci. 2022 Nov 18;23(22):14334. doi: 10.3390/ijms232214334 (PMC9696585; doi:10.3390/ijms232214334)
Supplement: Supplementary file 1 [file ijms-23-14334-s001.zip]

Archive with 9 entries (9 files):
- Supplementary Figure S1.png
- Supplementary Figure S2.png
- Supplementary Figure S3.png
- Supplementary Figure S4.png
- Supplementary Figure S5.png
- Supplementary Figure S6.png
- Supplementary Figure S7.png
- Supplementary Figures Caption.pdf
- Supplementary Tables.xlsx
