# Supplementary material for: Scalable Generation of Nanovesicles from Human-Induced Pluripotent Stem Cells for Cardiac Repair
Source: Int J Mol Sci. 2022 Nov 18;23(22):14334. doi: 10.3390/ijms232214334 (PMC9696585; doi:10.3390/ijms232214334)
Supplement: Supplementary file 1 [file ijms-23-14334-s001.zip › Supplementary Tables.xlsx]

## Sheet: Table S1
Supplementary Table S1 - Global cell proteome analysis of iPSC models and HUVECs
				LFQ Intensity (normalised)
Protein Accession	Entry Name	Protein Name	Gene Name	CERA_1	CERA_2	CERA_3	CERA_4	CL2_1	CL2_2	CL2_3	CL2_4	HUVEC_1	HUVEC_2	HUVEC_3	HUVEC_4
P12830	CADH1_HUMAN	Cadherin-1	CDH1	189930000	172760000	195000000	169290000	177110000	167930000	196190000	215000000	134060000	0	0	0
Q01860	PO5F1_HUMAN	POU domain, class 5, transcription factor 1	POU5F1	164890000	206220000	90042000	161780000	116620000	119800000	123580000	88811000	0	0	0	0
Q5T230	UTF1_HUMAN	Undifferentiated embryonic cell transcription factor 1	UTF1	16302000	0	0	0	0	0	0	0	0	0	0	0
Q9H9Z2	LN28A_HUMAN	Protein lin-28 homolog A	LIN28A	2029100000	1905600000	2044000000	1911200000	1924800000	1593800000	1820600000	1817600000	0	0	0	0
P02533	K1C14_HUMAN	Keratin, type I cytoskeletal 14	KRT14	486420000	298310000	131800000	57472000	233260000	759910000	269500000	357810000	165680000	320060000	317250000	128220000
P02768	ALBU_HUMAN	Albumin	ALB	51733000	51632000	6574000	36608000	73020000	69252000	39795000	46848000	0	0	0	0
P13645	K1C10_HUMAN	Keratin, type I cytoskeletal 10	KRT10	2400400000	7088400000	1939100000	1476000000	3985900000	6868200000	3323400000	5811300000	3498500000	7409900000	6705200000	3541100000
P13647	K2C5_HUMAN	Keratin, type II cytoskeletal 5	KRT5	192300000	251130000	73692000	0	156070000	524100000	133020000	122550000	60978000	104010000	211920000	54466000
P19013	K2C4_HUMAN	Keratin, type II cytoskeletal 4	KRT4	0	0	0	5350800	0	0	0	7900400	0	0	0	0
P35908	K22E_HUMAN	Keratin, type II cytoskeletal 2 epidermal	KRT2	15806000	0	0	0	0	0	0	0	18816000	6419600	0	0
P48668	K2C6C_HUMAN	Keratin, type II cytoskeletal 6C	KRT6C	457070000	166960000	0	0	111820000	477210000	177550000	292720000	86471000	182460000	177070000	150550000
Q04695	K1C17_HUMAN	Keratin, type I cytoskeletal 17	KRT17	16978000	0	0	0	10876000	46134000	0	0	0	0	0	0
Q14CN4	K2C72_HUMAN	Keratin, type II cytoskeletal 72	KRT72	0	0	0	0	0	0	0	0	0	0	21455000	0
P08729	K2C7_HUMAN	Keratin, type II cytoskeletal 7	KRT7	19100000	0	0	0	4018100	0	9984600	0	274750000	248780000	296490000	160960000
Q5D862	FILA2_HUMAN	Filaggrin-2	FLG2	0	0	0	0	0	0	0	0	0	0	5886900	0
Q86YZ3	HORN_HUMAN	Hornerin	HRNR	0	0	0	0	0	0	0	0	0	0	5549100	0
A0A024RBG1	NUD4B_HUMAN	Diphosphoinositol polyphosphate phosphohydrolase NUDT4B	NUDT4B	0	0	0	0	0	0	0	222300000	0	0	0	0
A0AV96	RBM47_HUMAN	RNA-binding protein 47	RBM47	34435000	28667000	29213000	29516000	24957000	24132000	27210000	23567000	0	0	0	0
A0AVT1	UBA6_HUMAN	Ubiquitin-like modifier-activating enzyme 6	UBA6	127570000	117300000	152220000	118870000	131980000	163720000	170090000	149010000	42075000	0	0	0
A0MZ66	SHOT1_HUMAN	Shootin-1	SHTN1	27324000	24626000	22875000	39189000	54428000	49002000	56669000	44755000	0	0	0	0
A1L020	MEX3A_HUMAN	RNA-binding protein MEX3A	MEX3A	0	17308000	0	0	0	18986000	0	0	0	0	0	0
A1L0T0	HACL2_HUMAN	2-hydroxyacyl-CoA lyase 2	ILVBL	21053000	0	69168000	36153000	51815000	49316000	46534000	38774000	44284000	46891000	67651000	39538000
A1L390	PKHG3_HUMAN	Pleckstrin homology domain-containing family G member 3	PLEKHG3	0	0	0	0	0	0	0	8977100	0	0	0	0
A1X283	SPD2B_HUMAN	SH3 and PX domain-containing protein 2B	SH3PXD2B	94390000	85738000	77725000	67471000	71391000	78449000	78128000	72230000	0	0	0	0
Q96IR2	ZN845_HUMAN	Zinc finger protein 845	ZNF845	0	0	0	0	0	0	0	0	0	0	874950	0
A2RRP1	NBAS_HUMAN	Neuroblastoma-amplified sequence	NBAS	8302200	0	0	0	0	0	0	0	99087000	100180000	174570000	71592000
A3KMH1	VWA8_HUMAN	von Willebrand factor A domain-containing protein 8	VWA8	24293000	0	90756000	82757000	52859000	58892000	17807000	0	17473000	0	23205000	21894000
A3KN83	SBNO1_HUMAN	Protein strawberry notch homolog 1	SBNO1	27650000	0	28602000	36032000	25149000	30821000	30715000	23377000	0	0	0	0
A4D1S0	KLRG2_HUMAN	Killer cell lectin-like receptor subfamily G member 2	KLRG2	20616000	45137000	16821000	11551000	0	0	0	9257400	0	0	0	0
A5PLL7	PDES1_HUMAN	Plasmanylethanolamine desaturase	PEDS1	0	0	0	0	0	0	0	0	0	0	0	843360
A5YKK6	CNOT1_HUMAN	CCR4-NOT transcription complex subunit 1	CNOT1	159470000	174530000	170140000	326680000	168540000	118440000	268830000	109290000	15165000	0	27516000	23378000
Q9GZQ8	MLP3B_HUMAN	Microtubule-associated proteins 1A/1B light chain 3B	MAP1LC3B	114180000	160590000	101040000	101860000	148610000	146910000	116420000	121320000	60706000	0	32474000	69180000
A6NDG6	PGP_HUMAN	Glycerol-3-phosphate phosphatase	PGP	62944000	55885000	64614000	54397000	55555000	63068000	76258000	71039000	0	0	0	0
A6NDU8	CE051_HUMAN	UPF0600 protein C5orf51	C5orf51	13227000	0	7630900	8391600	0	10829000	10146000	0	0	0	0	0
A6NFQ2	TCAF2_HUMAN	TRPM8 channel-associated factor 2	TCAF2	0	0	0	0	0	0	0	0	203160000	162440000	213420000	213970000
A6NHR9	SMHD1_HUMAN	Structural maintenance of chromosomes flexible hinge domain-containing protein 1	SMCHD1	49604000	41824000	48061000	71764000	66756000	57772000	60382000	54062000	0	0	0	0
A6NIH7	U119B_HUMAN	Protein unc-119 homolog B	UNC119B	0	0	0	36012000	0	0	0	0	0	0	0	0
A6NJ78	MET15_HUMAN	12S rRNA N4-methylcytidine (m4C) methyltransferase	METTL15	8223000	0	0	8331000	0	0	0	0	0	0	0	0
A6NKT7	RGPD3_HUMAN	RanBP2-like and GRIP domain-containing protein 3	RGPD3	0	0	0	0	0	0	0	0	0	0	17267000	0
A6QL63	BTBDB_HUMAN	Ankyrin repeat and BTB/POZ domain-containing protein BTBD11	BTBD11	0	0	0	1562500	0	0	0	0	0	0	0	0
A6ZKI3	RTL8C_HUMAN	Retrotransposon Gag-like protein 8C	RTL8C	8671400	8708300	6138300	8808300	9478700	9824400	8228900	8374700	0	0	0	0
P62308	RUXG_HUMAN	Small nuclear ribonucleoprotein G	SNRPG	90689000	98094000	53024000	61170000	108010000	107820000	51084000	64482000	0	0	0	0
A8MWY0	ELAP2_HUMAN	Endosome/lysosome-associated apoptosis and autophagy regulator family member 2	ELAPOR2	0	0	0	0	0	0	0	0	103810000	61993000	82337000	71234000
B2RUZ4	SMIM1_HUMAN	Small integral membrane protein 1	SMIM1	0	0	0	0	0	0	0	0	0	0	0	7509500
P0CG08	GPHRB_HUMAN	Golgi pH regulator B	GPR89B	7859600	0	0	8389800	0	10939000	9968900	8502800	23474000	0	0	0
C4AMC7	WASH3_HUMAN	Putative WAS protein family homolog 3	WASH3P	16067000	0	0	12076000	0	0	0	0	0	0	0	0
C9JLW8	MCRI1_HUMAN	Mapk-regulated corepressor-interacting protein 1	MCRIP1	0	0	0	0	12383000	0	0	11752000	0	0	0	0
Q13765	NACA_HUMAN	Nascent polypeptide-associated complex subunit alpha	NACA	611980000	556250000	523550000	668830000	880140000	688250000	716710000	843720000	0	0	87173000	0
E9PRG8	CK098_HUMAN	Uncharacterized protein C11orf98	C11orf98	95289000	105720000	89384000	93988000	128490000	78947000	67193000	72184000	19210000	0	0	0
O00115	DNS2A_HUMAN	Deoxyribonuclease-2-alpha	DNASE2	13692000	0	0	0	11213000	15150000	12663000	18876000	0	0	0	0
O00116	ADAS_HUMAN	Alkyldihydroxyacetonephosphate synthase, peroxisomal	AGPS	105320000	107110000	176840000	147450000	161010000	130980000	179140000	149420000	381250000	182810000	366130000	206810000
O00124	UBXN8_HUMAN	UBX domain-containing protein 8	UBXN8	0	0	0	0	0	0	0	0	2038000	0	0	0
O00148	DX39A_HUMAN	ATP-dependent RNA helicase DDX39A	DDX39A	86131000	79712000	55968000	84771000	45516000	51108000	86459000	92842000	49652000	0	0	0
O00151	PDLI1_HUMAN	PDZ and LIM domain protein 1	PDLIM1	532590000	408830000	721050000	856280000	547390000	550200000	835100000	881960000	0	0	0	0
O00154	BACH_HUMAN	Cytosolic acyl coenzyme A thioester hydrolase	ACOT7	440810000	388070000	478880000	515890000	435130000	590890000	543480000	513660000	0	0	0	83751000
O00159	MYO1C_HUMAN	Unconventional myosin-Ic	MYO1C	188650000	56363000	230130000	199650000	244340000	258360000	323050000	317390000	5392900000	4054300000	5389100000	4455100000
O00161	SNP23_HUMAN	Synaptosomal-associated protein 23	SNAP23	96763000	81333000	109040000	104600000	63809000	74325000	72507000	87766000	568670000	333660000	524320000	265770000
O00165	HAX1_HUMAN	HCLS1-associated protein X-1	HAX1	18235000	0	0	0	0	0	0	0	39084000	21854000	21234000	14605000
O00170	AIP_HUMAN	AH receptor-interacting protein	AIP	43182000	0	0	0	0	0	0	0	0	0	0	0
O00178	GTPB1_HUMAN	GTP-binding protein 1	GTPBP1	116630000	88664000	94166000	94403000	81594000	79455000	89025000	92772000	0	34129000	34861000	0
O00186	STXB3_HUMAN	Syntaxin-binding protein 3	STXBP3	39253000	48861000	32765000	34017000	18597000	25882000	22495000	25614000	138770000	102730000	162530000	103980000
O00192	ARVC_HUMAN	Armadillo repeat protein deleted in velo-cardio-facial syndrome	ARVCF	0	0	0	0	0	0	0	0	28862000	23093000	42992000	0
O00193	SMAP_HUMAN	Small acidic protein	SMAP	89176000	67340000	125770000	114540000	75735000	86064000	139960000	182830000	0	0	0	0
O00203	AP3B1_HUMAN	AP-3 complex subunit beta-1	AP3B1	153760000	86301000	161080000	174650000	87837000	128500000	112890000	95285000	136350000	152520000	177350000	136680000
O00214	LEG8_HUMAN	Galectin-8	LGALS8	0	0	0	0	0	0	0	0	65838000	77982000	62949000	71317000
O00217	NDUS8_HUMAN	NADH dehydrogenase [ubiquinone] iron-sulfur protein 8, mitochondrial	NDUFS8	24708000	0	0	0	0	0	0	0	13789000	0	19908000	0
O00220	TR10A_HUMAN	Tumor necrosis factor receptor superfamily member 10A	TNFRSF10A	0	0	0	0	0	0	0	0	0	0	0	20695000
O00231	PSD11_HUMAN	26S proteasome non-ATPase regulatory subunit 11	PSMD11	796560000	875100000	1095700000	576160000	840650000	811790000	1024100000	1105200000	69012000	26664000	64325000	26089000
O00232	PSD12_HUMAN	26S proteasome non-ATPase regulatory subunit 12	PSMD12	316060000	261200000	292190000	371400000	315310000	408930000	318760000	594000000	25807000	42994000	51136000	0
O00233	PSMD9_HUMAN	26S proteasome non-ATPase regulatory subunit 9	PSMD9	59308000	42943000	48126000	71991000	65712000	70336000	78269000	66177000	0	0	0	0
O00244	ATOX1_HUMAN	Copper transport protein ATOX1	ATOX1	14004000	15326000	0	0	0	0	0	14868000	0	0	0	0
O00264	PGRC1_HUMAN	Membrane-associated progesterone receptor component 1	PGRMC1	288160000	221590000	184380000	141260000	70875000	160230000	162680000	264650000	0	33678000	35828000	32844000
O00267	SPT5H_HUMAN	Transcription elongation factor SPT5	SUPT5H	121880000	59488000	179780000	300020000	124430000	87909000	134980000	129550000	0	0	0	0
O00273	DFFA_HUMAN	DNA fragmentation factor subunit alpha	DFFA	167220000	168530000	178460000	149740000	70559000	81858000	128740000	160420000	0	0	0	0
O00291	HIP1_HUMAN	Huntingtin-interacting protein 1	HIP1	44953000	0	46922000	40416000	40893000	31753000	28514000	35020000	0	0	0	0
O00292	LFTY2_HUMAN	Left-right determination factor 2	LEFTY2	136570000	121270000	111470000	126130000	233010000	235740000	268740000	239470000	0	0	0	0
O00299	CLIC1_HUMAN	Chloride intracellular channel protein 1	CLIC1	505630000	412950000	396860000	796120000	1225900000	1025100000	1435600000	1240300000	0	0	72324000	0
O00303	EIF3F_HUMAN	Eukaryotic translation initiation factor 3 subunit F	EIF3F	288750000	304740000	291190000	374520000	251130000	274680000	270260000	245000000	42208000	0	33929000	17040000
O00311	CDC7_HUMAN	Cell division cycle 7-related protein kinase	CDC7	26003000	0	19479000	0	0	0	23658000	0	0	0	0	0
O00330	ODPX_HUMAN	Pyruvate dehydrogenase protein X component, mitochondrial	PDHX	37042000	34538000	27597000	31842000	35779000	34830000	38330000	45538000	0	0	44760000	0
O00391	QSOX1_HUMAN	Sulfhydryl oxidase 1	QSOX1	15799000	0	0	0	0	0	0	0	107940000	76616000	105320000	101280000
O00399	DCTN6_HUMAN	Dynactin subunit 6	DCTN6	10900000	9841100	10795000	0	0	0	0	0	0	0	0	0
O00400	ACATN_HUMAN	Acetyl-coenzyme A transporter 1	SLC33A1	0	0	0	0	0	0	0	0	24989000	0	29782000	0
O00401	WASL_HUMAN	Neural Wiskott-Aldrich syndrome protein	WASL	22442000	19714000	19199000	16607000	24882000	22656000	19176000	18075000	0	0	0	0
O00410	IPO5_HUMAN	Importin-5	IPO5	1525400000	765010000	1533400000	1276100000	996030000	856730000	1250200000	1162300000	106340000	79843000	288390000	35723000
O00411	RPOM_HUMAN	DNA-directed RNA polymerase, mitochondrial	POLRMT	18509000	25079000	17970000	13911000	19422000	21188000	12409000	11989000	23298000	9752100	19866000	18982000
O00418	EF2K_HUMAN	Eukaryotic elongation factor 2 kinase	EEF2K	0	0	0	6097400	0	0	0	0	0	0	0	0
O00422	SAP18_HUMAN	Histone deacetylase complex subunit SAP18	SAP18	0	0	14580000	9631700	0	0	8462600	9096600	0	0	0	0
O00423	EMAL1_HUMAN	Echinoderm microtubule-associated protein-like 1	EML1	0	0	0	0	0	0	0	0	0	0	0	25508000
O00425	IF2B3_HUMAN	Insulin-like growth factor 2 mRNA-binding protein 3	IGF2BP3	1379500000	1414700000	1432700000	1444800000	1166200000	1226400000	1203900000	1165400000	297350000	135490000	319590000	252570000
O00429	DNM1L_HUMAN	Dynamin-1-like protein	DNM1L	162320000	170390000	198020000	197140000	112390000	123030000	170810000	139500000	49866000	69935000	100480000	60490000
O00442	RTCA_HUMAN	RNA 3'-terminal phosphate cyclase	RTCA	21918000	19503000	19643000	17779000	24839000	18343000	19685000	18943000	19157000	0	19845000	24863000
O00443	P3C2A_HUMAN	Phosphatidylinositol 4-phosphate 3-kinase C2 domain-containing subunit alpha	PIK3C2A	65448000	66286000	56391000	51877000	43430000	50877000	60192000	49809000	191890000	120640000	224380000	109730000
O00458	IFRD1_HUMAN	Interferon-related developmental regulator 1	IFRD1	0	0	0	0	0	0	0	3974200	0	0	0	0
O00461	GOLI4_HUMAN	Golgi integral membrane protein 4	GOLIM4	50678000	62482000	0	0	0	0	22102000	46692000	226680000	263740000	476540000	84849000
O00462	MANBA_HUMAN	Beta-mannosidase	MANBA	18413000	19852000	23789000	20990000	25349000	15075000	15719000	15609000	0	0	0	0
O00469	PLOD2_HUMAN	Procollagen-lysine,2-oxoglutarate 5-dioxygenase 2	PLOD2	0	0	0	0	0	0	0	0	0	0	0	28590000
O00471	EXOC5_HUMAN	Exocyst complex component 5	EXOC5	14757000	0	61740000	60017000	0	23025000	20665000	24263000	76953000	39138000	78336000	39028000
O00479	HMGN4_HUMAN	High mobility group nucleosome-binding domain-containing protein 4	HMGN4	1256300	8583700	2497800	0	0	470100	258300	0	0	0	0	0
O00483	NDUA4_HUMAN	Cytochrome c oxidase subunit NDUFA4	NDUFA4	102070000	77378000	51145000	92268000	89073000	73719000	90001000	77942000	0	0	0	0
O00487	PSDE_HUMAN	26S proteasome non-ATPase regulatory subunit 14	PSMD14	249590000	208320000	216800000	257970000	239170000	193590000	250720000	262220000	25254000	0	0	0
O00505	IMA4_HUMAN	Importin subunit alpha-4	KPNA3	63386000	43038000	51099000	66480000	41919000	40743000	45195000	28116000	0	0	0	0
O00512	BCL9_HUMAN	B-cell CLL/lymphoma 9 protein	BCL9	0	0	0	0	0	0	0	1486700	0	0	0	0
O00515	LAD1_HUMAN	Ladinin-1	LAD1	0	0	0	0	13476000	0	0	14800000	0	0	0	0
O00534	VMA5A_HUMAN	von Willebrand factor A domain-containing protein 5A	VWA5A	10898000	0	8561100	9123300	7859000	13646000	11028000	5229800	0	0	0	0
O00541	PESC_HUMAN	Pescadillo homolog	PES1	181370000	203490000	180800000	178040000	168410000	146140000	167610000	150710000	104110000	0	78753000	85745000
O00555	CAC1A_HUMAN	Voltage-dependent P/Q-type calcium channel subunit alpha-1A	CACNA1A	0	0	138710000	42285000	0	42570000	36115000	0	0	0	0	0
O00560	SDCB1_HUMAN	Syntenin-1	SDCBP	71498000	113930000	85933000	82005000	0	0	72402000	53821000	743830000	208800000	735470000	388890000
O00566	MPP10_HUMAN	U3 small nucleolar ribonucleoprotein protein MPP10	MPHOSPH10	86118000	52759000	87065000	44407000	48480000	66354000	55996000	43097000	0	0	0	0
O00567	NOP56_HUMAN	Nucleolar protein 56	NOP56	682640000	735800000	652960000	606120000	472290000	546900000	672340000	664440000	1318400000	818290000	1272300000	1063500000
O00571	DDX3X_HUMAN	ATP-dependent RNA helicase DDX3X	DDX3X	848110000	686980000	1037600000	1031900000	765280000	714780000	945720000	883130000	710190000	544320000	740230000	667070000
O00592	PODXL_HUMAN	Podocalyxin	PODXL	217600000	243490000	420290000	165830000	335260000	257230000	307780000	266600000	0	0	0	0
O00622	CCN1_HUMAN	CCN family member 1	CCN1	56023000	38859000	39774000	45424000	202190000	161360000	125920000	186200000	0	0	0	0
O00625	PIR_HUMAN	Pirin	PIR	0	0	0	14046000	14364000	0	16262000	18082000	0	0	0	0
O00629	IMA3_HUMAN	Importin subunit alpha-3	KPNA4	100120000	95240000	108240000	111180000	111410000	96297000	103000000	105700000	0	0	0	0
O00743	PPP6_HUMAN	Serine/threonine-protein phosphatase 6 catalytic subunit	PPP6C	126350000	131390000	100630000	152140000	104090000	108310000	120020000	88582000	0	0	62236000	0
O00746	NDKM_HUMAN	Nucleoside diphosphate kinase, mitochondrial	NME4	100520000	223890000	122540000	129080000	99794000	161560000	179800000	147270000	0	0	76371000	48912000
O00754	MA2B1_HUMAN	Lysosomal alpha-mannosidase	MAN2B1	32913000	29221000	40175000	38708000	41120000	30119000	34653000	31609000	0	0	0	0
O00762	UBE2C_HUMAN	Ubiquitin-conjugating enzyme E2 C	UBE2C	34051000	31074000	23676000	35346000	52663000	39371000	34670000	41276000	0	0	0	0
O00764	PDXK_HUMAN	Pyridoxal kinase	PDXK	102410000	109240000	73335000	65928000	51245000	104160000	51188000	81967000	0	0	0	0
O00767	SCD_HUMAN	Stearoyl-CoA desaturase	SCD	0	0	63398000	61608000	111720000	106400000	69874000	89826000	0	0	0	0
O14494	PLPP1_HUMAN	Phospholipid phosphatase 1	PLPP1	0	0	14879000	16692000	0	0	20188000	22485000	15664000	0	30968000	0
O14495	PLPP3_HUMAN	Phospholipid phosphatase 3	PLPP3	0	0	0	0	0	0	0	0	23296000	0	34662000	0
O14497	ARI1A_HUMAN	AT-rich interactive domain-containing protein 1A	ARID1A	124550000	114500000	215070000	196490000	95480000	70338000	121010000	126190000	0	0	0	0
O14530	TXND9_HUMAN	Thioredoxin domain-containing protein 9	TXNDC9	57891000	64202000	65492000	75128000	65919000	65392000	87184000	89980000	0	0	0	0
O14531	DPYL4_HUMAN	Dihydropyrimidinase-related protein 4	DPYSL4	0	0	0	0	37500000	29591000	33202000	38035000	0	0	0	0
O14545	TRAD1_HUMAN	TRAF-type zinc finger domain-containing protein 1	TRAFD1	31322000	32632000	0	34385000	30540000	30963000	38272000	38552000	38446000	0	0	0
O14548	COX7R_HUMAN	Cytochrome c oxidase subunit 7A-related protein, mitochondrial	COX7A2L	24967000	0	0	0	32068000	0	0	29619000	0	0	0	0
O14562	UBFD1_HUMAN	Ubiquitin domain-containing protein UBFD1	UBFD1	45228000	43781000	40006000	47126000	56218000	47659000	51313000	50651000	0	0	0	0
O14569	C56D2_HUMAN	Transmembrane reductase CYB561D2	CYB561D2	0	0	0	0	0	0	0	0	73671000	93520000	73771000	116430000
O14578	CTRO_HUMAN	Citron Rho-interacting kinase	CIT	23551000	18215000	20829000	14331000	12909000	16776000	15697000	18737000	0	0	0	0
O14579	COPE_HUMAN	Coatomer subunit epsilon	COPE	56569000	49253000	45039000	54811000	50212000	44762000	64456000	70530000	0	0	0	0
O14617	AP3D1_HUMAN	AP-3 complex subunit delta-1	AP3D1	128600000	81395000	132270000	158890000	104290000	119120000	103150000	104940000	348960000	128260000	242940000	127020000
O14618	CCS_HUMAN	Copper chaperone for superoxide dismutase	CCS	29731000	33296000	24644000	28298000	0	26042000	26587000	33255000	0	0	0	0
O14639	ABLM1_HUMAN	Actin-binding LIM protein 1	ABLIM1	0	0	0	0	0	0	0	0	0	15269000	0	0
P54792	DVLP1_HUMAN	Putative segment polarity protein dishevelled homolog DVL1P1	DVL1P1	0	0	0	0	0	20621000	0	0	0	0	0	0
O14653	GOSR2_HUMAN	Golgi SNAP receptor complex member 2	GOSR2	0	0	40847000	0	42255000	0	34500000	37441000	109100000	75135000	80765000	56129000
O14656	TOR1A_HUMAN	Torsin-1A	TOR1A	14753000	0	0	0	0	17512000	23527000	0	68587000	33983000	73845000	53461000
O14657	TOR1B_HUMAN	Torsin-1B	TOR1B	0	0	0	0	0	0	0	0	14894000	0	20351000	18255000
O14672	ADA10_HUMAN	Disintegrin and metalloproteinase domain-containing protein 10	ADAM10	50017000	0	64285000	35960000	32152000	13714000	32574000	22013000	393890000	529670000	457510000	566810000
O14678	ABCD4_HUMAN	Lysosomal cobalamin transporter ABCD4	ABCD4	0	0	0	0	0	0	0	0	9153800	0	9841500	0
O14683	P5I11_HUMAN	Tumor protein p53-inducible protein 11	TP53I11	0	0	0	0	0	0	32634000	0	90436000	0	75680000	0
O14727	APAF_HUMAN	Apoptotic protease-activating factor 1	APAF1	0	0	0	0	0	0	0	0	51144000	0	51596000	52334000
O14734	ACOT8_HUMAN	Acyl-coenzyme A thioesterase 8	ACOT8	0	0	5064300	0	0	0	0	0	0	0	0	0
O14735	CDIPT_HUMAN	CDP-diacylglycerol--inositol 3-phosphatidyltransferase	CDIPT	96394000	81684000	92626000	89920000	37020000	37098000	43513000	51042000	303950000	160390000	60942000	191590000
O14737	PDCD5_HUMAN	Programmed cell death protein 5	PDCD5	207610000	177030000	144670000	159820000	177390000	204210000	219410000	199570000	0	0	0	0
O14744	ANM5_HUMAN	Protein arginine N-methyltransferase 5	PRMT5	252090000	203760000	310760000	288510000	153680000	163050000	183050000	231320000	43199000	0	68268000	45469000
O14745	NHRF1_HUMAN	Na(+)/H(+) exchange regulatory cofactor NHE-RF1	SLC9A3R1	204870000	225050000	301570000	217690000	114980000	146980000	163870000	166800000	0	0	0	0
O14757	CHK1_HUMAN	Serine/threonine-protein kinase Chk1	CHEK1	53903000	52506000	61009000	72536000	47298000	54743000	57923000	53150000	0	0	0	0
O14763	TR10B_HUMAN	Tumor necrosis factor receptor superfamily member 10B	TNFRSF10B	0	0	0	0	0	0	0	0	0	0	34621000	0
O14773	TPP1_HUMAN	Tripeptidyl-peptidase 1	TPP1	54668000	42728000	0	0	50773000	84506000	48274000	68081000	0	94289000	0	80280000
O14776	TCRG1_HUMAN	Transcription elongation regulator 1	TCERG1	265630000	240140000	234910000	250210000	175710000	203130000	203070000	221950000	0	0	0	0
O14777	NDC80_HUMAN	Kinetochore protein NDC80 homolog	NDC80	44479000	35854000	38356000	34357000	35552000	35178000	39339000	33966000	0	0	0	0
O14782	KIF3C_HUMAN	Kinesin-like protein KIF3C	KIF3C	0	0	3717800	0	0	0	0	0	0	0	0	0
O14798	TR10C_HUMAN	Tumor necrosis factor receptor superfamily member 10C	TNFRSF10C	0	0	0	0	0	0	0	0	0	0	0	9226000
O14818	PSA7_HUMAN	Proteasome subunit alpha type-7	PSMA7	723930000	636760000	834090000	823500000	658150000	686700000	933490000	871560000	69956000	122040000	72466000	86433000
O14827	RGRF2_HUMAN	Ras-specific guanine nucleotide-releasing factor 2	RASGRF2	10712000	0	0	0	0	0	0	0	0	0	0	0
O14828	SCAM3_HUMAN	Secretory carrier-associated membrane protein 3	SCAMP3	26355000	0	41087000	55515000	0	0	0	0	403390000	162110000	260280000	242200000
O14841	OPLA_HUMAN	5-oxoprolinase	OPLAH	0	0	0	0	0	0	5000700	0	0	0	0	0
O14874	BCKD_HUMAN	[3-methyl-2-oxobutanoate dehydrogenase [lipoamide]] kinase, mitochondrial	BCKDK	0	0	0	0	0	0	0	0	21092000	0	18120000	0
O14880	MGST3_HUMAN	Microsomal glutathione S-transferase 3	MGST3	77935000	58734000	0	0	74399000	72127000	62068000	60332000	60914000	0	57237000	0
O14907	TX1B3_HUMAN	Tax1-binding protein 3	TAX1BP3	26701000	0	21258000	27955000	39362000	35209000	40972000	30701000	23651000	0	0	0
O14908	GIPC1_HUMAN	PDZ domain-containing protein GIPC1	GIPC1	16086000	0	29984000	41442000	43705000	19471000	30472000	0	67905000	36944000	69522000	24549000
O14910	LIN7A_HUMAN	Protein lin-7 homolog A	LIN7A	0	0	0	0	0	0	0	0	0	0	0	1150300
O14920	IKKB_HUMAN	Inhibitor of nuclear factor kappa-B kinase subunit beta	IKBKB	19054000	0	0	0	21634000	19701000	0	0	26708000	34722000	44624000	0
O14925	TIM23_HUMAN	Mitochondrial import inner membrane translocase subunit Tim23	TIMM23	29150000	0	0	0	0	0	37561000	54065000	35930000	0	24063000	31639000
O14929	HAT1_HUMAN	Histone acetyltransferase type B catalytic subunit	HAT1	112470000	77343000	108500000	89225000	93014000	98128000	112750000	91629000	41660000	0	26572000	0
O14936	CSKP_HUMAN	Peripheral plasma membrane protein CASK	CASK	38635000	41874000	23309000	22855000	0	42969000	41767000	49083000	34812000	0	0	40447000
O14939	PLD2_HUMAN	Phospholipase D2	PLD2	0	0	0	0	0	0	0	0	24984000	0	25404000	0
O14949	QCR8_HUMAN	Cytochrome b-c1 complex subunit 8	UQCRQ	117140000	82649000	81087000	87855000	60073000	72936000	68353000	88502000	79040000	58395000	67053000	0
P19105	ML12A_HUMAN	Myosin regulatory light chain 12A	MYL12A	514340000	376060000	642340000	544410000	701120000	719290000	653030000	405100000	174780000	159070000	194350000	215230000
O14964	HGS_HUMAN	Hepatocyte growth factor-regulated tyrosine kinase substrate	HGS	48537000	0	64087000	50603000	64396000	52135000	38570000	57849000	74062000	80215000	90372000	65801000
O14965	AURKA_HUMAN	Aurora kinase A	AURKA	0	0	0	0	11012000	0	0	0	0	0	0	0
O14972	VP26C_HUMAN	Vacuolar protein sorting-associated protein 26C	VPS26C	0	0	0	4840300	6593900	0	0	0	0	0	0	0
O14974	MYPT1_HUMAN	Protein phosphatase 1 regulatory subunit 12A	PPP1R12A	183950000	185890000	237160000	218330000	212800000	196770000	242560000	257050000	0	0	0	0
O14976	GAK_HUMAN	Cyclin-G-associated kinase	GAK	0	19764000	16911000	17143000	30594000	23310000	25246000	20822000	9595600	0	21717000	12894000
O14979	HNRDL_HUMAN	Heterogeneous nuclear ribonucleoprotein D-like	HNRNPDL	503600000	453190000	466430000	493460000	488350000	433920000	546720000	524460000	0	0	0	0
O14980	XPO1_HUMAN	Exportin-1	XPO1	875000000	776760000	836620000	855870000	639250000	738870000	864860000	652330000	121170000	69152000	77467000	55432000
O14981	BTAF1_HUMAN	TATA-binding protein-associated factor 172	BTAF1	0	0	13923000	0	14343000	13502000	13581000	16459000	0	0	0	0
O15013	ARHGA_HUMAN	Rho guanine nucleotide exchange factor 10	ARHGEF10	20317000	0	51236000	29902000	25029000	18173000	22031000	26004000	33506000	21265000	41247000	32237000
O15020	SPTN2_HUMAN	Spectrin beta chain, non-erythrocytic 2	SPTBN2	0	0	0	0	24830000	28020000	37336000	38341000	0	0	0	0
O15027	SC16A_HUMAN	Protein transport protein Sec16A	SEC16A	24723000	29887000	36274000	33397000	33638000	47894000	41319000	51961000	81082000	40306000	54132000	0
O15031	PLXB2_HUMAN	Plexin-B2	PLXNB2	0	0	0	0	0	0	0	0	99335000	78800000	106300000	63839000
O15033	AREL1_HUMAN	Apoptosis-resistant E3 ubiquitin protein ligase 1	AREL1	0	0	0	0	0	0	0	0	12027000	13948000	15105000	13691000
O15042	SR140_HUMAN	U2 snRNP-associated SURP motif-containing protein	U2SURP	269330000	161960000	418410000	344630000	162510000	174630000	334140000	286560000	0	0	0	0
O15067	PUR4_HUMAN	Phosphoribosylformylglycinamidine synthase	PFAS	1198600000	1044800000	1154700000	1142800000	831780000	749870000	920350000	1074300000	0	0	20291000	0
O15084	ANR28_HUMAN	Serine/threonine-protein phosphatase 6 regulatory ankyrin repeat subunit A	ANKRD28	28339000	32814000	33588000	34624000	32240000	28708000	32468000	31097000	0	0	0	0
O15091	MRPP3_HUMAN	Mitochondrial ribonuclease P catalytic subunit	PRORP	49379000	65955000	88871000	90071000	71112000	61625000	59051000	55783000	30114000	0	0	0
O15118	NPC1_HUMAN	NPC intracellular cholesterol transporter 1	NPC1	0	0	33149000	35898000	61217000	0	47619000	0	34480000	0	44883000	0
O15120	PLCB_HUMAN	1-acyl-sn-glycerol-3-phosphate acyltransferase beta	AGPAT2	0	0	0	0	0	0	0	0	39690000	0	0	0
O15121	DEGS1_HUMAN	Sphingolipid delta(4)-desaturase DES1	DEGS1	0	0	0	0	0	0	0	0	49750000	35190000	28803000	0
O15123	ANGP2_HUMAN	Angiopoietin-2	ANGPT2	0	0	0	0	0	0	0	0	0	0	21287000	0
O15126	SCAM1_HUMAN	Secretory carrier-associated membrane protein 1	SCAMP1	57802000	0	43065000	45609000	61234000	43358000	49687000	74538000	148640000	81562000	116330000	88563000
O15127	SCAM2_HUMAN	Secretory carrier-associated membrane protein 2	SCAMP2	38640000	0	0	0	0	62401000	0	0	82035000	114980000	89827000	79230000
O15143	ARC1B_HUMAN	Actin-related protein 2/3 complex subunit 1B	ARPC1B	0	0	0	0	0	0	0	0	50372000	0	80456000	0
O15144	ARPC2_HUMAN	Actin-related protein 2/3 complex subunit 2	ARPC2	527990000	347330000	453230000	492630000	343940000	390020000	520530000	531900000	685890000	445710000	275230000	531790000
O15145	ARPC3_HUMAN	Actin-related protein 2/3 complex subunit 3	ARPC3	203880000	317490000	245200000	165670000	426430000	258890000	211670000	293090000	0	0	0	0
O15155	BET1_HUMAN	BET1 homolog	BET1	0	43619000	41912000	62749000	39614000	34505000	49509000	29667000	0	0	0	0
O15160	RPAC1_HUMAN	DNA-directed RNA polymerases I and III subunit RPAC1	POLR1C	58307000	58433000	59264000	64027000	68701000	61385000	57671000	50391000	55107000	44120000	72787000	35753000
O15162	PLS1_HUMAN	Phospholipid scramblase 1	PLSCR1	0	0	0	0	0	0	0	0	0	0	30727000	0
O15164	TIF1A_HUMAN	Transcription intermediary factor 1-alpha	TRIM24	71581000	75887000	90356000	87465000	53165000	48660000	45810000	39293000	0	0	0	0
O15173	PGRC2_HUMAN	Membrane-associated progesterone receptor component 2	PGRMC2	81387000	71518000	66028000	70165000	62620000	78377000	67210000	66470000	143390000	91821000	120480000	105470000
O15182	CETN3_HUMAN	Centrin-3	CETN3	0	0	0	0	0	4037000	0	0	0	0	0	0
O15212	PFD6_HUMAN	Prefoldin subunit 6	PFDN6	43913000	27937000	28081000	25616000	33256000	37121000	33874000	39448000	0	0	0	0
O15213	WDR46_HUMAN	WD repeat-containing protein 46	WDR46	52839000	0	61243000	68568000	54910000	59084000	51618000	42265000	105450000	46669000	50489000	92182000
O15226	NKRF_HUMAN	NF-kappa-B-repressing factor	NKRF	25560000	0	0	0	0	0	0	0	0	0	32061000	0
O15228	GNPAT_HUMAN	Dihydroxyacetone phosphate acyltransferase	GNPAT	25726000	0	0	0	0	0	0	0	38804000	0	46790000	51056000
O15230	LAMA5_HUMAN	Laminin subunit alpha-5	LAMA5	36993000	0	34117000	31546000	46273000	0	36843000	52338000	0	0	37902000	0
O15231	ZN185_HUMAN	Zinc finger protein 185	ZNF185	0	13827000	0	0	0	0	0	0	399860000	77506000	372670000	180820000
O15235	RT12_HUMAN	28S ribosomal protein S12, mitochondrial	MRPS12	0	0	0	0	0	0	0	0	8226000	0	10149000	4371200
O15240	VGF_HUMAN	Neurosecretory protein VGF	VGF	0	0	9786700	21752000	227790000	90533000	187490000	242940000	0	0	0	0
O15254	ACOX3_HUMAN	Peroxisomal acyl-coenzyme A oxidase 3	ACOX3	0	0	0	0	0	0	0	0	0	10094000	8620300	0
O15258	RER1_HUMAN	Protein RER1	RER1	23454000	51150000	57252000	50997000	37237000	37196000	61673000	56294000	552280000	323260000	383060000	332860000
O15260	SURF4_HUMAN	Surfeit locus protein 4	SURF4	184620000	226920000	185620000	149750000	98927000	154880000	144120000	187240000	1807000000	788420000	1771100000	802120000
O15269	SPTC1_HUMAN	Serine palmitoyltransferase 1	SPTLC1	115760000	132340000	129750000	143830000	149080000	52936000	156870000	158020000	1164800000	572520000	1075100000	983740000
O15270	SPTC2_HUMAN	Serine palmitoyltransferase 2	SPTLC2	25333000	0	0	0	0	0	0	0	373150000	258100000	413820000	355300000
O15294	OGT1_HUMAN	UDP-N-acetylglucosamine--peptide N-acetylglucosaminyltransferase 110 kDa subunit	OGT	91852000	91707000	92959000	102590000	74493000	69271000	73827000	86064000	0	0	0	0
O15305	PMM2_HUMAN	Phosphomannomutase 2	PMM2	28007000	27910000	55353000	36845000	47656000	26795000	44391000	39079000	0	0	0	0
O15318	RPC7_HUMAN	DNA-directed RNA polymerase III subunit RPC7	POLR3G	0	0	0	49196000	0	0	0	0	0	0	0	0
O15344	TRI18_HUMAN	E3 ubiquitin-protein ligase Midline-1	MID1	0	0	0	18037000	0	35168000	0	0	0	0	0	0
O15347	HMGB3_HUMAN	High mobility group protein B3	HMGB3	457020000	510700000	707180000	593360000	473510000	396390000	487570000	443810000	0	0	0	0
O15355	PPM1G_HUMAN	Protein phosphatase 1G	PPM1G	225620000	231760000	346590000	433330000	305670000	300800000	343770000	333300000	0	0	0	0
O15371	EIF3D_HUMAN	Eukaryotic translation initiation factor 3 subunit D	EIF3D	343710000	395110000	403200000	424440000	341670000	292600000	499690000	394690000	327440000	187410000	239890000	247710000
O15372	EIF3H_HUMAN	Eukaryotic translation initiation factor 3 subunit H	EIF3H	240810000	230070000	174270000	206830000	209830000	218410000	266530000	214980000	80130000	97624000	64412000	81330000
O15381	NVL_HUMAN	Nuclear valosin-containing protein-like	NVL	8249300	0	0	0	0	0	0	0	0	0	0	0
O15382	BCAT2_HUMAN	Branched-chain-amino-acid aminotransferase, mitochondrial	BCAT2	0	0	36255000	36525000	0	0	0	39708000	132340000	111360000	0	86952000
O15397	IPO8_HUMAN	Importin-8	IPO8	45940000	45558000	40826000	43704000	41122000	38668000	41512000	36261000	0	0	0	0
O15400	STX7_HUMAN	Syntaxin-7	STX7	25987000	0	31479000	0	0	33910000	0	38997000	172180000	214860000	251940000	164370000
O15427	MOT4_HUMAN	Monocarboxylate transporter 4	SLC16A3	0	0	0	0	0	0	0	0	1406900000	224230000	1102000000	517470000
O15446	RPA34_HUMAN	DNA-directed RNA polymerase I subunit RPA34	POLR1G	27364000	25143000	25771000	39002000	38087000	24330000	27446000	30597000	0	0	0	0
O15460	P4HA2_HUMAN	Prolyl 4-hydroxylase subunit alpha-2	P4HA2	0	0	0	0	0	0	0	0	334600000	250800000	352940000	256610000
O15484	CAN5_HUMAN	Calpain-5	CAPN5	0	0	0	0	0	0	0	0	22005000	0	0	16215000
O15498	YKT6_HUMAN	Synaptobrevin homolog YKT6	YKT6	38883000	54822000	53182000	56263000	34490000	52586000	41203000	34916000	0	0	0	0
O15511	ARPC5_HUMAN	Actin-related protein 2/3 complex subunit 5	ARPC5	91906000	134400000	80893000	119840000	213800000	125970000	127400000	189720000	0	0	0	0
O15523	DDX3Y_HUMAN	ATP-dependent RNA helicase DDX3Y	DDX3Y	0	0	39747000	38825000	0	0	0	0	0	0	0	0
O15533	TPSN_HUMAN	Tapasin	TAPBP	0	0	0	0	0	0	0	0	140220000	0	0	131180000
O15540	FABP7_HUMAN	Fatty acid-binding protein, brain	FABP7	13761000	13364000	13798000	18038000	0	0	0	0	0	0	0	0
O43143	DHX15_HUMAN	Pre-mRNA-splicing factor ATP-dependent RNA helicase DHX15	DHX15	732960000	955890000	770430000	817770000	729920000	770990000	773660000	790140000	516530000	277840000	453660000	317480000
O43148	MCES_HUMAN	mRNA cap guanine-N7 methyltransferase	RNMT	63708000	60305000	61096000	76668000	72226000	75106000	70095000	70886000	0	0	0	0
O43156	TTI1_HUMAN	TELO2-interacting protein 1 homolog	TTI1	0	0	36996000	34654000	12394000	0	0	0	0	0	0	0
O43159	RRP8_HUMAN	Ribosomal RNA-processing protein 8	RRP8	0	0	14245000	15125000	0	0	24221000	11719000	44754000	18443000	21107000	0
O43164	PJA2_HUMAN	E3 ubiquitin-protein ligase Praja-2	PJA2	0	0	0	0	0	9083200	7668200	5861200	0	0	0	0
O43166	SI1L1_HUMAN	Signal-induced proliferation-associated 1-like protein 1	SIPA1L1	0	0	0	0	0	0	8171700	8661700	0	0	0	0
O43172	PRP4_HUMAN	U4/U6 small nuclear ribonucleoprotein Prp4	PRPF4	69751000	59143000	91929000	68796000	64921000	92156000	82004000	85941000	89208000	105410000	103180000	79099000
O43175	SERA_HUMAN	D-3-phosphoglycerate dehydrogenase	PHGDH	3382400000	4032200000	3381400000	3082900000	2365900000	2351500000	3362500000	2930800000	0	0	0	0
O43237	DC1L2_HUMAN	Cytoplasmic dynein 1 light intermediate chain 2	DYNC1LI2	93420000	0	90293000	0	0	0	46366000	55175000	170370000	89826000	140460000	56045000
O43242	PSMD3_HUMAN	26S proteasome non-ATPase regulatory subunit 3	PSMD3	643320000	543850000	795280000	868870000	383650000	428680000	590780000	746920000	495840000	232970000	580840000	368690000
O43252	PAPS1_HUMAN	Bifunctional 3'-phosphoadenosine 5'-phosphosulfate synthase 1	PAPSS1	152610000	111630000	247620000	160430000	157990000	167570000	223100000	202590000	101040000	99323000	88819000	95609000
O43264	ZW10_HUMAN	Centromere/kinetochore protein zw10 homolog	ZW10	60938000	0	58768000	64483000	58095000	59482000	59709000	42973000	38132000	46104000	38319000	37260000
O43272	PROD_HUMAN	Proline dehydrogenase 1, mitochondrial	PRODH	0	0	0	0	16841000	27772000	0	0	0	0	0	0
O43278	SPIT1_HUMAN	Kunitz-type protease inhibitor 1	SPINT1	79666000	41957000	57017000	47057000	60791000	60104000	55833000	73909000	0	0	0	0
O43286	B4GT5_HUMAN	Beta-1,4-galactosyltransferase 5	B4GALT5	0	0	0	0	0	0	0	0	25240000	11868000	23493000	21413000
O43290	SNUT1_HUMAN	U4/U6.U5 tri-snRNP-associated protein 1	SART1	91711000	88130000	93451000	74441000	91700000	91346000	87280000	64830000	0	0	0	0
O43292	GPAA1_HUMAN	Glycosylphosphatidylinositol anchor attachment 1 protein	GPAA1	25826000	0	0	0	0	0	28980000	39087000	142500000	108170000	72794000	117480000
O43293	DAPK3_HUMAN	Death-associated protein kinase 3	DAPK3	0	0	0	0	0	0	0	0	0	0	28687000	0
O43294	TGFI1_HUMAN	Transforming growth factor beta-1-induced transcript 1 protein	TGFB1I1	0	0	0	19441000	23285000	21945000	16689000	14490000	0	0	0	0
O43318	M3K7_HUMAN	Mitogen-activated protein kinase kinase kinase 7	MAP3K7	16508000	18798000	33028000	13545000	6464700	8982000	11258000	16432000	0	0	0	0
O43324	MCA3_HUMAN	Eukaryotic translation elongation factor 1 epsilon-1	EEF1E1	131070000	101470000	118420000	137370000	176250000	168720000	146070000	174600000	0	0	29011000	0
O43347	MSI1H_HUMAN	RNA-binding protein Musashi homolog 1	MSI1	12393000	14807000	14209000	14803000	28658000	22386000	19453000	15193000	0	0	0	0
O43390	HNRPR_HUMAN	Heterogeneous nuclear ribonucleoprotein R	HNRNPR	700480000	494370000	694240000	483290000	632520000	647270000	690340000	633710000	0	8680300	0	0
O43395	PRPF3_HUMAN	U4/U6 small nuclear ribonucleoprotein Prp3	PRPF3	73605000	83852000	94372000	103820000	82744000	92008000	104320000	96475000	0	0	0	0
O43396	TXNL1_HUMAN	Thioredoxin-like protein 1	TXNL1	205930000	162760000	246180000	269940000	265590000	239720000	297060000	309730000	0	0	0	0
O43399	TPD54_HUMAN	Tumor protein D54	TPD52L2	168670000	120960000	132600000	136710000	193550000	188120000	190490000	194160000	57946000	144030000	0	0
O43402	EMC8_HUMAN	ER membrane protein complex subunit 8	EMC8	63567000	0	0	0	0	0	0	0	91996000	0	0	0
O43447	PPIH_HUMAN	Peptidyl-prolyl cis-trans isomerase H	PPIH	64152000	56240000	61160000	56744000	58121000	65199000	60017000	52921000	0	0	0	0
O43488	ARK72_HUMAN	Aflatoxin B1 aldehyde reductase member 2	AKR7A2	53290000	35829000	48250000	43280000	67111000	72598000	65575000	67074000	0	0	23386000	0
O43490	PROM1_HUMAN	Prominin-1	PROM1	0	0	0	18860000	18298000	15912000	24760000	18476000	0	0	0	0
O43491	E41L2_HUMAN	Band 4.1-like protein 2	EPB41L2	295320000	302120000	326790000	346610000	234780000	214100000	272010000	265960000	202710000	214800000	304740000	160650000
O43493	TGON2_HUMAN	Trans-Golgi network integral membrane protein 2	TGOLN2	0	0	16543000	0	0	0	0	0	6912100	0	20982000	0
O43505	B4GA1_HUMAN	Beta-1,4-glucuronyltransferase 1	B4GAT1	10534000	0	0	0	0	0	0	0	49079000	36573000	40468000	47684000
O43520	AT8B1_HUMAN	Phospholipid-transporting ATPase IC	ATP8B1	0	0	0	0	0	0	0	0	50492000	47300000	36769000	54885000
O43583	DENR_HUMAN	Density-regulated protein	DENR	61181000	56205000	55641000	74725000	69355000	58094000	71502000	76914000	0	0	0	0
O43592	XPOT_HUMAN	Exportin-T	XPOT	122710000	129890000	107550000	91917000	104740000	81089000	96294000	90585000	64708000	0	14102000	60082000
O43598	DNPH1_HUMAN	2'-deoxynucleoside 5'-phosphate N-hydrolase 1	DNPH1	39980000	0	27662000	0	34273000	0	32169000	0	0	0	0	0
O43615	TIM44_HUMAN	Mitochondrial import inner membrane translocase subunit TIM44	TIMM44	203830000	205460000	187410000	243540000	186500000	182900000	177730000	157140000	171130000	166740000	167740000	134800000
O43617	TPPC3_HUMAN	Trafficking protein particle complex subunit 3	TRAPPC3	29805000	26184000	28574000	45161000	24487000	31670000	32294000	24217000	0	0	0	0
O43633	CHM2A_HUMAN	Charged multivesicular body protein 2a	CHMP2A	0	0	0	0	0	0	0	0	19888000	0	0	0
O43660	PLRG1_HUMAN	Pleiotropic regulator 1	PLRG1	133710000	67944000	121230000	91993000	136620000	115440000	90866000	126320000	299020000	177500000	170320000	176840000
O43665	RGS10_HUMAN	Regulator of G-protein signaling 10	RGS10	0	0	0	0	0	0	13311000	14103000	0	0	0	0
O43670	ZN207_HUMAN	BUB3-interacting and GLEBS motif-containing protein ZNF207	ZNF207	92457000	73719000	136360000	118050000	84679000	72318000	85100000	121790000	0	0	0	0
O43674	NDUB5_HUMAN	NADH dehydrogenase [ubiquinone] 1 beta subcomplex subunit 5, mitochondrial	NDUFB5	0	31580000	0	0	0	0	0	0	0	0	24374000	0
O43676	NDUB3_HUMAN	NADH dehydrogenase [ubiquinone] 1 beta subcomplex subunit 3	NDUFB3	35510000	0	39050000	23171000	0	0	23460000	24333000	93375000	84889000	130230000	111730000
O43681	GET3_HUMAN	ATPase GET3	GET3	80943000	93994000	60964000	72113000	62241000	67015000	62757000	64504000	14807000	0	25043000	0
O43684	BUB3_HUMAN	Mitotic checkpoint protein BUB3	BUB3	421050000	382670000	508460000	500910000	353440000	421140000	494320000	523290000	679610000	576550000	635830000	395110000
O43707	ACTN4_HUMAN	Alpha-actinin-4	ACTN4	2192000000	1699600000	3058400000	3001500000	2802500000	3552100000	3821100000	3977800000	2678500000	2488400000	2797400000	1985200000
O43709	BUD23_HUMAN	Probable 18S rRNA (guanine-N(7))-methyltransferase	BUD23	15957000	19666000	20402000	23401000	22094000	21628000	17972000	24182000	0	0	0	0
O43719	HTSF1_HUMAN	HIV Tat-specific factor 1	HTATSF1	53288000	55531000	46834000	59523000	45481000	62368000	63132000	48193000	0	0	0	0
O43747	AP1G1_HUMAN	AP-1 complex subunit gamma-1	AP1G1	75850000	61127000	64562000	58823000	48493000	49460000	42104000	36621000	54266000	0	0	41662000
O43752	STX6_HUMAN	Syntaxin-6	STX6	25158000	19588000	29612000	28179000	0	21782000	29578000	24879000	21925000	51423000	43460000	32696000
O43760	SNG2_HUMAN	Synaptogyrin-2	SYNGR2	14471000	13591000	0	0	0	0	16316000	12543000	45408000	43165000	0	0
O43765	SGTA_HUMAN	Small glutamine-rich tetratricopeptide repeat-containing protein alpha	SGTA	17095000	0	19289000	0	13726000	12152000	0	15690000	0	0	0	0
O43768	ENSA_HUMAN	Alpha-endosulfine	ENSA	330890000	244770000	297650000	270370000	148090000	257080000	279210000	256790000	0	0	0	0
O43772	MCAT_HUMAN	Mitochondrial carnitine/acylcarnitine carrier protein	SLC25A20	0	0	0	0	0	0	0	0	178520000	99480000	194890000	147560000
O43776	SYNC_HUMAN	Asparagine--tRNA ligase, cytoplasmic	NARS1	988420000	628010000	1174500000	1347000000	741120000	871480000	1057800000	1239800000	58395000	22345000	33284000	0
O43795	MYO1B_HUMAN	Unconventional myosin-Ib	MYO1B	97247000	79695000	87600000	75781000	71138000	72659000	69249000	79922000	121270000	45194000	117090000	135280000
O43809	CPSF5_HUMAN	Cleavage and polyadenylation specificity factor subunit 5	NUDT21	427550000	415970000	429770000	451570000	311370000	317790000	328220000	340470000	0	0	0	0
O43813	LANC1_HUMAN	Glutathione S-transferase LANCL1	LANCL1	50511000	0	49137000	35611000	36128000	0	0	0	0	0	0	0
O43815	STRN_HUMAN	Striatin	STRN	34516000	51660000	51447000	47974000	38636000	36441000	34175000	31961000	57248000	38301000	50907000	35448000
O43818	U3IP2_HUMAN	U3 small nucleolar RNA-interacting protein 2	RRP9	81422000	101030000	95183000	90250000	79456000	68872000	83414000	103000000	60731000	0	102160000	0
O43819	SCO2_HUMAN	Protein SCO2 homolog, mitochondrial	SCO2	0	0	0	0	0	0	0	0	44076000	0	43177000	37635000
O43824	GTPB6_HUMAN	Putative GTP-binding protein 6	GTPBP6	7920600	0	0	21173000	24512000	0	37087000	22027000	32225000	0	41006000	0
O43837	IDH3B_HUMAN	Isocitrate dehydrogenase [NAD] subunit beta, mitochondrial	IDH3B	51145000	42021000	54917000	54639000	101960000	80845000	59713000	56276000	123900000	87962000	89946000	107410000
O43847	NRDC_HUMAN	Nardilysin	NRDC	154770000	133370000	150780000	158060000	132340000	174960000	197430000	133990000	0	0	0	0
O43852	CALU_HUMAN	Calumenin	CALU	235030000	189910000	317080000	225200000	171540000	223460000	169000000	160630000	67745000	234000000	133940000	147620000
O43854	EDIL3_HUMAN	EGF-like repeat and discoidin I-like domain-containing protein 3	EDIL3	76351000	41564000	45528000	53625000	104240000	83390000	58720000	77284000	0	0	0	0
O43865	SAHH2_HUMAN	S-adenosylhomocysteine hydrolase-like protein 1	AHCYL1	72856000	84097000	73320000	93245000	85058000	83632000	131490000	104650000	75149000	48185000	70614000	0
O43896	KIF1C_HUMAN	Kinesin-like protein KIF1C	KIF1C	12889000	0	0	0	0	0	0	0	0	0	51812000	0
O43913	ORC5_HUMAN	Origin recognition complex subunit 5	ORC5	17961000	16981000	0	0	28550000	0	17095000	0	0	0	0	0
O43920	NDUS5_HUMAN	NADH dehydrogenase [ubiquinone] iron-sulfur protein 5	NDUFS5	37521000	0	22695000	0	39709000	0	0	0	31836000	0	60497000	27941000
O43929	ORC4_HUMAN	Origin recognition complex subunit 4	ORC4	19030000	18135000	19274000	19697000	0	20164000	0	0	0	0	0	0
O60216	RAD21_HUMAN	Double-strand-break repair protein rad21 homolog	RAD21	19104000	0	27767000	31071000	17193000	16519000	32969000	35334000	0	0	0	0
O60231	DHX16_HUMAN	Pre-mRNA-splicing factor ATP-dependent RNA helicase DHX16	DHX16	17734000	0	0	0	0	0	0	0	0	0	0	0
O60244	MED14_HUMAN	Mediator of RNA polymerase II transcription subunit 14	MED14	0	0	0	86179000	81534000	88433000	88190000	78499000	0	0	0	0
O60256	KPRB_HUMAN	Phosphoribosyl pyrophosphate synthase-associated protein 2	PRPSAP2	55995000	92435000	65254000	52285000	65159000	73291000	90031000	74522000	0	0	0	0
O60264	SMCA5_HUMAN	SWI/SNF-related matrix-associated actin-dependent regulator of chromatin subfamily A member 5	SMARCA5	717500000	648620000	792500000	825150000	523700000	494000000	555980000	531530000	282420000	132470000	234710000	228600000
O60271	JIP4_HUMAN	C-Jun-amino-terminal kinase-interacting protein 4	SPAG9	63609000	67410000	68213000	60010000	111690000	102260000	148250000	102370000	47983000	0	0	25457000
O60279	SUSD5_HUMAN	Sushi domain-containing protein 5	SUSD5	0	0	0	0	0	0	0	0	0	0	125120000	0
O60281	ZN292_HUMAN	Zinc finger protein 292	ZNF292	0	0	0	34592000	0	0	0	0	0	0	0	0
O60282	KIF5C_HUMAN	Kinesin heavy chain isoform 5C	KIF5C	17229000	0	18515000	15251000	26940000	23824000	16747000	20660000	0	0	0	0
O60287	NPA1P_HUMAN	Nucleolar pre-ribosomal-associated protein 1	URB1	14653000	0	15482000	15443000	0	0	0	0	0	0	0	0
O60291	MGRN1_HUMAN	E3 ubiquitin-protein ligase MGRN1	MGRN1	0	0	0	0	0	0	0	0	0	0	20239000	23885000
O60293	ZC3H1_HUMAN	Zinc finger C3H1 domain-containing protein	ZFC3H1	10736000	0	0	0	0	0	0	0	0	0	0	0
O60306	AQR_HUMAN	RNA helicase aquarius	AQR	26588000	34596000	51508000	30498000	27350000	16473000	23331000	45307000	0	0	0	0
O60313	OPA1_HUMAN	Dynamin-like 120 kDa protein, mitochondrial	OPA1	143900000	121470000	153770000	142460000	189170000	148860000	146250000	152800000	217960000	178060000	225740000	204790000
O60341	KDM1A_HUMAN	Lysine-specific histone demethylase 1A	KDM1A	206300000	133570000	171960000	181110000	99844000	101320000	105070000	75692000	0	0	0	0
O60343	TBCD4_HUMAN	TBC1 domain family member 4	TBC1D4	28867000	34563000	23429000	39073000	25692000	20012000	22339000	27641000	0	0	0	0
O60346	PHLP1_HUMAN	PH domain leucine-rich repeat-containing protein phosphatase 1	PHLPP1	0	3878800	0	0	0	0	0	0	0	0	0	0
O60353	FZD6_HUMAN	Frizzled-6	FZD6	0	0	0	0	0	0	0	0	0	55037000	0	49666000
O60427	FADS1_HUMAN	Acyl-CoA (8-3)-desaturase	FADS1	0	16912000	34999000	18884000	19996000	15546000	20258000	20670000	61550000	0	52053000	0
O60437	PEPL_HUMAN	Periplakin	PPL	0	16161000	15101000	17104000	37956000	45189000	43832000	52051000	0	0	0	0
O60462	NRP2_HUMAN	Neuropilin-2	NRP2	0	0	0	0	0	0	0	0	41701000	0	52339000	0
O60476	MA1A2_HUMAN	Mannosyl-oligosaccharide 1,2-alpha-mannosidase IB	MAN1A2	0	0	0	0	0	0	0	0	32922000	0	0	23829000
O60487	MPZL2_HUMAN	Myelin protein zero-like protein 2	MPZL2	0	0	0	0	0	0	0	0	0	16870000	19389000	18610000
O60488	ACSL4_HUMAN	Long-chain-fatty-acid--CoA ligase 4	ACSL4	131400000	141200000	160200000	154240000	175280000	212810000	255130000	223190000	163130000	143710000	227690000	196680000
O60493	SNX3_HUMAN	Sorting nexin-3	SNX3	0	0	51162000	37398000	30338000	41552000	44635000	37519000	0	0	0	27750000
O60499	STX10_HUMAN	Syntaxin-10	STX10	0	0	0	0	0	0	0	0	0	8791300	0	0
O60502	OGA_HUMAN	Protein O-GlcNAcase	OGA	105730000	77722000	95045000	93534000	73363000	81411000	65829000	65803000	0	0	0	0
O60504	VINEX_HUMAN	Vinexin	SORBS3	0	0	0	0	0	0	19950000	21312000	0	0	0	0
O60506	HNRPQ_HUMAN	Heterogeneous nuclear ribonucleoprotein Q	SYNCRIP	1511300000	1566900000	1838100000	2298600000	1713400000	1403600000	1810300000	1819100000	181830000	56337000	104950000	24340000
O60507	TPST1_HUMAN	Protein-tyrosine sulfotransferase 1	TPST1	0	0	0	0	0	0	0	0	20636000	0	0	0
O60508	PRP17_HUMAN	Pre-mRNA-processing factor 17	CDC40	0	0	0	0	0	0	0	0	35461000	59273000	28692000	34071000
O60513	B4GT4_HUMAN	Beta-1,4-galactosyltransferase 4	B4GALT4	15845000	0	34907000	37934000	16605000	14568000	17400000	21343000	0	0	0	0
O60524	NEMF_HUMAN	Nuclear export mediator factor NEMF	NEMF	46704000	41843000	37964000	40884000	49563000	37328000	43170000	37385000	0	0	28438000	0
O60547	GMDS_HUMAN	GDP-mannose 4,6 dehydratase	GMDS	104430000	96975000	80441000	89129000	55822000	60355000	75314000	82002000	0	0	0	0
O60551	NMT2_HUMAN	Glycylpeptide N-tetradecanoyltransferase 2	NMT2	0	0	0	0	0	0	0	0	0	0	12641000	0
O60566	BUB1B_HUMAN	Mitotic checkpoint serine/threonine-protein kinase BUB1 beta	BUB1B	53233000	51016000	36166000	51778000	28712000	21842000	29952000	40697000	0	0	0	0
O60568	PLOD3_HUMAN	Multifunctional procollagen lysine hydroxylase and glycosyltransferase LH3	PLOD3	11534000	10031000	8864000	20658000	35918000	16217000	35636000	55930000	455020000	380430000	445830000	382800000
O60573	IF4E2_HUMAN	Eukaryotic translation initiation factor 4E type 2	EIF4E2	0	0	28455000	22712000	21520000	21285000	26388000	0	0	0	0	0
O60610	DIAP1_HUMAN	Protein diaphanous homolog 1	DIAPH1	175490000	113360000	153060000	155310000	203400000	145280000	136780000	111720000	47413000	0	55498000	0
O60645	EXOC3_HUMAN	Exocyst complex component 3	EXOC3	0	0	0	0	0	21282000	0	0	52421000	44826000	60191000	46258000
O60664	PLIN3_HUMAN	Perilipin-3	PLIN3	187890000	183360000	264090000	203740000	275170000	253180000	408630000	370950000	94103000	87172000	143450000	52497000
O60678	ANM3_HUMAN	Protein arginine N-methyltransferase 3	PRMT3	84256000	70046000	71893000	71336000	32788000	42510000	51837000	38064000	0	0	0	0
O60684	IMA7_HUMAN	Importin subunit alpha-7	KPNA6	60180000	68025000	58062000	49952000	48658000	60845000	39431000	49054000	17676000	0	45486000	36559000
O60701	UGDH_HUMAN	UDP-glucose 6-dehydrogenase	UGDH	417610000	420900000	502500000	642700000	416880000	394660000	587010000	513500000	76365000	0	103550000	0
O60704	TPST2_HUMAN	Protein-tyrosine sulfotransferase 2	TPST2	0	0	0	0	0	0	0	0	24950000	0	0	25098000
O60711	LPXN_HUMAN	Leupaxin	LPXN	0	0	0	0	0	0	0	0	66929000	59070000	75224000	73159000
O60716	CTND1_HUMAN	Catenin delta-1	CTNND1	310880000	222700000	289570000	340110000	274130000	351890000	354830000	407340000	2458900000	1832600000	2718200000	1998600000
O60725	ICMT_HUMAN	Protein-S-isoprenylcysteine O-methyltransferase	ICMT	0	0	12486000	16776000	12865000	0	8504000	0	27247000	0	18362000	0
O60749	SNX2_HUMAN	Sorting nexin-2	SNX2	104110000	118250000	155220000	155200000	141600000	110350000	171320000	229720000	26580000	0	64754000	72637000
O60762	DPM1_HUMAN	Dolichol-phosphate mannosyltransferase subunit 1	DPM1	86892000	71602000	0	110590000	83919000	67505000	54256000	57386000	234510000	154060000	180560000	182360000
O60763	USO1_HUMAN	General vesicular transport factor p115	USO1	776940000	762590000	1173200000	1122900000	636080000	625020000	692020000	837600000	154940000	98774000	243320000	61104000
O60783	RT14_HUMAN	28S ribosomal protein S14, mitochondrial	MRPS14	37323000	0	42681000	51315000	0	0	50082000	0	45225000	42441000	57676000	0
O60784	TOM1_HUMAN	Target of Myb protein 1	TOM1	0	0	5241900	0	0	0	0	0	0	0	0	0
O60826	CCD22_HUMAN	Coiled-coil domain-containing protein 22	CCDC22	0	0	0	0	0	0	0	0	0	0	36253000	0
O60828	PQBP1_HUMAN	Polyglutamine-binding protein 1	PQBP1	50717000	43483000	51569000	67669000	50529000	54062000	80734000	54631000	0	0	0	0
O60831	PRAF2_HUMAN	PRA1 family protein 2	PRAF2	0	0	0	0	0	0	0	0	238850000	164560000	177660000	231630000
O60832	DKC1_HUMAN	H/ACA ribonucleoprotein complex subunit DKC1	DKC1	169490000	134670000	142520000	213320000	207200000	143350000	202440000	179150000	278820000	274590000	364030000	289700000
O60841	IF2P_HUMAN	Eukaryotic translation initiation factor 5B	EIF5B	337640000	283820000	310120000	315850000	308870000	265740000	422170000	328690000	267570000	154540000	191370000	185550000
O60869	EDF1_HUMAN	Endothelial differentiation-related factor 1	EDF1	148310000	134840000	225360000	216140000	147780000	221430000	213980000	311840000	0	0	0	13401000
O60870	KIN17_HUMAN	DNA/RNA-binding protein KIN17	KIN	0	0	11524000	10781000	11055000	0	9853100	10504000	0	0	0	0
O60884	DNJA2_HUMAN	DnaJ homolog subfamily A member 2	DNAJA2	147030000	163700000	185170000	268650000	232760000	176400000	277030000	138950000	136020000	63691000	105630000	93557000
O60885	BRD4_HUMAN	Bromodomain-containing protein 4	BRD4	88302000	64572000	67443000	80814000	52665000	49069000	75496000	78487000	0	0	0	0
O60906	NSMA_HUMAN	Sphingomyelin phosphodiesterase 2	SMPD2	0	0	0	0	0	0	0	0	11510000	0	0	0
O60911	CATL2_HUMAN	Cathepsin L2	CTSV	0	0	0	0	0	0	14295000	0	0	0	0	0
O60925	PFD1_HUMAN	Prefoldin subunit 1	PFDN1	0	12978000	0	0	0	0	36502000	0	0	0	0	0
O60927	PP1RB_HUMAN	E3 ubiquitin-protein ligase PPP1R11	PPP1R11	0	0	0	0	0	0	6873300	0	0	0	0	0
O60942	MCE1_HUMAN	mRNA-capping enzyme	RNGTT	9362600	7214100	0	3940000	11013000	9761200	7579400	6478600	0	0	0	0
O75027	ABCB7_HUMAN	Iron-sulfur clusters transporter ABCB7, mitochondrial	ABCB7	71123000	72787000	35807000	64145000	62964000	71339000	69088000	76522000	97331000	0	150590000	83733000
O75037	KI21B_HUMAN	Kinesin-like protein KIF21B	KIF21B	0	0	0	0	0	0	0	0	0	0	13902000	0
O75044	SRGP2_HUMAN	SLIT-ROBO Rho GTPase-activating protein 2	SRGAP2	0	0	0	0	0	0	0	0	0	0	0	8825900
O75051	PLXA2_HUMAN	Plexin-A2	PLXNA2	0	0	0	0	0	0	0	0	643330000	520140000	512690000	561960000
O75063	XYLK_HUMAN	Glycosaminoglycan xylosylkinase	FAM20B	30454000	0	0	0	0	0	0	0	47219000	35553000	35602000	49578000
O75083	WDR1_HUMAN	WD repeat-containing protein 1	WDR1	1174600000	928620000	1698700000	1675600000	1227200000	1516800000	1798600000	2011500000	3645900000	2925700000	3683100000	2580800000
O75084	FZD7_HUMAN	Frizzled-7	FZD7	58207000	49482000	39125000	45146000	60762000	50762000	36743000	24725000	0	0	0	0
O75110	ATP9A_HUMAN	Probable phospholipid-transporting ATPase IIA	ATP9A	0	0	0	0	0	0	0	0	76600000	79161000	85177000	80571000
O75116	ROCK2_HUMAN	Rho-associated protein kinase 2	ROCK2	40011000	0	66318000	41770000	49431000	38747000	47385000	39405000	161600000	105110000	292760000	161380000
O75122	CLAP2_HUMAN	CLIP-associating protein 2	CLASP2	33197000	40651000	27649000	29342000	22452000	22609000	20751000	22773000	0	0	0	0
O75128	COBL_HUMAN	Protein cordon-bleu	COBL	0	0	0	0	0	0	0	4642000	0	0	0	0
O75131	CPNE3_HUMAN	Copine-3	CPNE3	233680000	187100000	124460000	184080000	195250000	142690000	236370000	191950000	0	0	0	23842000
O75143	ATG13_HUMAN	Autophagy-related protein 13	ATG13	0	0	0	0	0	0	0	0	0	0	1074600	0
O75146	HIP1R_HUMAN	Huntingtin-interacting protein 1-related protein	HIP1R	0	0	0	0	0	0	0	0	77566000	81154000	62069000	78944000
O75150	BRE1B_HUMAN	E3 ubiquitin-protein ligase BRE1B	RNF40	29209000	0	40760000	37296000	27491000	25123000	34918000	22976000	40546000	0	40527000	0
O75152	ZC11A_HUMAN	Zinc finger CCCH domain-containing protein 11A	ZC3H11A	37725000	38110000	34167000	45092000	31927000	29622000	40121000	37836000	0	0	0	0
O75164	KDM4A_HUMAN	Lysine-specific demethylase 4A	KDM4A	0	0	0	0	0	0	0	10520000	0	0	0	0
O75165	DJC13_HUMAN	DnaJ homolog subfamily C member 13	DNAJC13	29274000	14790000	35825000	49328000	25264000	23782000	48184000	33228000	940810000	560580000	870150000	446340000
O75170	PP6R2_HUMAN	Serine/threonine-protein phosphatase 6 regulatory subunit 2	PPP6R2	1818200	0	0	1512400	0	0	1831500	3195700	0	0	0	0
O75175	CNOT3_HUMAN	CCR4-NOT transcription complex subunit 3	CNOT3	33463000	27035000	42532000	50075000	38276000	30152000	33911000	26360000	0	0	0	0
O75179	ANR17_HUMAN	Ankyrin repeat domain-containing protein 17	ANKRD17	44224000	60543000	63672000	49810000	54945000	51960000	47344000	49636000	0	0	0	0
O75190	DNJB6_HUMAN	DnaJ homolog subfamily B member 6	DNAJB6	29193000	38966000	23073000	0	38213000	57904000	47615000	37491000	0	0	0	0
O75223	GGCT_HUMAN	Gamma-glutamylcyclotransferase	GGCT	42529000	64015000	85644000	76917000	55197000	79826000	91961000	80818000	0	0	0	0
O75251	NDUS7_HUMAN	NADH dehydrogenase [ubiquinone] iron-sulfur protein 7, mitochondrial	NDUFS7	126030000	0	0	0	0	0	0	0	105980000	106520000	123160000	122260000
O75306	NDUS2_HUMAN	NADH dehydrogenase [ubiquinone] iron-sulfur protein 2, mitochondrial	NDUFS2	105100000	103760000	114160000	110170000	139050000	123820000	116310000	82785000	142620000	106370000	144810000	123630000
O75312	ZPR1_HUMAN	Zinc finger protein ZPR1	ZPR1	32034000	31070000	24585000	27618000	38669000	28857000	29456000	33327000	0	0	0	0
O75323	NIPS2_HUMAN	Protein NipSnap homolog 2	NIPSNAP2	33469000	0	0	0	0	0	0	0	114080000	107070000	104480000	103560000
O75330	HMMR_HUMAN	Hyaluronan mediated motility receptor	HMMR	0	29589000	40178000	35820000	0	32650000	0	35944000	0	0	0	0
O75347	TBCA_HUMAN	Tubulin-specific chaperone A	TBCA	1018300000	920860000	818540000	900270000	803720000	800390000	876540000	885770000	0	0	0	0
O75348	VATG1_HUMAN	V-type proton ATPase subunit G 1	ATP6V1G1	35299000	0	0	0	47473000	28445000	32979000	24495000	0	0	0	0
O75351	VPS4B_HUMAN	Vacuolar protein sorting-associated protein 4B	VPS4B	109810000	93544000	101240000	87487000	125980000	130290000	111190000	118710000	0	0	0	0
O75352	MPU1_HUMAN	Mannose-P-dolichol utilization defect 1 protein	MPDU1	0	0	0	0	0	0	0	0	376610000	215470000	389990000	64872000
O75362	ZN217_HUMAN	Zinc finger protein 217	ZNF217	0	0	0	0	0	0	0	15721000	0	0	0	0
O75367	H2AY_HUMAN	Core histone macro-H2A.1	MACROH2A1	126100000	167190000	136060000	130560000	211160000	179980000	184830000	207010000	178330000	184770000	148440000	147030000
O75368	SH3L1_HUMAN	SH3 domain-binding glutamic acid-rich-like protein	SH3BGRL	207670000	155480000	212000000	209880000	125030000	107980000	153300000	134690000	0	0	0	0
O75369	FLNB_HUMAN	Filamin-B	FLNB	2817300000	2966000000	3106400000	3822000000	4296000000	4260300000	5012000000	4613000000	6627500000	5459000000	6097700000	6004300000
O75380	NDUS6_HUMAN	NADH dehydrogenase [ubiquinone] iron-sulfur protein 6, mitochondrial	NDUFS6	57476000	75637000	76463000	72725000	56725000	21708000	51063000	53625000	0	55778000	56464000	0
O75381	PEX14_HUMAN	Peroxisomal membrane protein PEX14	PEX14	20040000	0	17967000	24306000	0	21653000	17864000	0	0	0	0	0
O75382	TRIM3_HUMAN	Tripartite motif-containing protein 3	TRIM3	0	0	0	0	0	0	0	0	19543000	0	15929000	0
O75390	CISY_HUMAN	Citrate synthase, mitochondrial	CS	279600000	261360000	374370000	260470000	377070000	392910000	341070000	461590000	4097400000	3197900000	4285100000	3793600000
O75391	SPAG7_HUMAN	Sperm-associated antigen 7	SPAG7	0	76212000	55626000	0	38235000	51466000	0	49933000	0	0	0	0
O75396	SC22B_HUMAN	Vesicle-trafficking protein SEC22b	SEC22B	71351000	0	0	42725000	0	83768000	56690000	75861000	818510000	539230000	916300000	436520000
O75400	PR40A_HUMAN	Pre-mRNA-processing factor 40 homolog A	PRPF40A	68243000	50833000	72451000	66139000	65377000	86947000	68860000	62564000	0	0	0	0
O75420	GGYF1_HUMAN	GRB10-interacting GYF protein 1	GIGYF1	0	0	13817000	0	0	0	0	10123000	0	0	0	0
O75427	LRCH4_HUMAN	Leucine-rich repeat and calponin homology domain-containing protein 4	LRCH4	0	0	0	0	0	0	0	0	0	0	13755000	0
O75431	MTX2_HUMAN	Metaxin-2	MTX2	29949000	0	26098000	0	0	0	0	19647000	0	0	0	0
O75436	VP26A_HUMAN	Vacuolar protein sorting-associated protein 26A	VPS26A	71993000	59190000	64007000	61087000	49023000	40875000	52427000	73562000	86727000	76522000	113390000	106840000
O75438	NDUB1_HUMAN	NADH dehydrogenase [ubiquinone] 1 beta subcomplex subunit 1	NDUFB1	0	0	0	0	0	0	0	0	0	0	13358000	0
O75439	MPPB_HUMAN	Mitochondrial-processing peptidase subunit beta	PMPCB	138020000	164040000	124660000	129440000	172060000	142000000	139730000	113890000	209950000	203090000	172190000	179700000
O75475	PSIP1_HUMAN	PC4 and SFRS1-interacting protein	PSIP1	771900000	586920000	767100000	769760000	400660000	445760000	520200000	500920000	0	0	0	73050000
O75477	ERLN1_HUMAN	Erlin-1	ERLIN1	19832000	0	41842000	61950000	59373000	58329000	67164000	74076000	223250000	165030000	345860000	114890000
O75487	GPC4_HUMAN	Glypican-4	GPC4	689000000	661660000	605800000	732280000	1837700000	1402700000	1815400000	1682500000	0	0	0	0
O75489	NDUS3_HUMAN	NADH dehydrogenase [ubiquinone] iron-sulfur protein 3, mitochondrial	NDUFS3	80817000	50448000	46360000	60120000	48950000	48283000	27798000	62070000	37760000	0	34033000	19851000
O75494	SRS10_HUMAN	Serine/arginine-rich splicing factor 10	SRSF10	50630000	86359000	139350000	125840000	92775000	110910000	104790000	117360000	22152000	0	0	0
O75508	CLD11_HUMAN	Claudin-11	CLDN11	0	0	0	0	0	0	0	0	701860000	0	449060000	0
O75521	ECI2_HUMAN	Enoyl-CoA delta isomerase 2	ECI2	96288000	93195000	100590000	140920000	106620000	123950000	122390000	83353000	597150000	432450000	524790000	340950000
O75530	EED_HUMAN	Polycomb protein EED	EED	17771000	16696000	10814000	10521000	0	0	0	0	0	0	0	0
O75531	BAF_HUMAN	Barrier-to-autointegration factor	BANF1	22995000	0	10016000	7660800	12396000	14559000	16762000	18145000	0	0	0	0
O75533	SF3B1_HUMAN	Splicing factor 3B subunit 1	SF3B1	822660000	712160000	950170000	1043700000	837540000	724130000	933400000	767530000	864900000	639500000	1001800000	795110000
O75534	CSDE1_HUMAN	Cold shock domain-containing protein E1	CSDE1	563710000	574630000	845380000	722110000	439210000	549720000	504540000	545130000	12758000	0	0	0
O75558	STX11_HUMAN	Syntaxin-11	STX11	0	0	0	0	0	0	0	0	79578000	0	68444000	14985000
O75569	PRKRA_HUMAN	Interferon-inducible double-stranded RNA-dependent protein kinase activator A	PRKRA	48072000	49993000	55449000	51246000	50203000	57909000	48225000	54463000	0	0	0	0
O75592	MYCB2_HUMAN	E3 ubiquitin-protein ligase MYCBP2	MYCBP2	0	0	0	0	0	0	0	0	39313000	0	31743000	0
O75607	NPM3_HUMAN	Nucleoplasmin-3	NPM3	122720000	104100000	104170000	120220000	54880000	90113000	75626000	111210000	0	0	0	0
O75608	LYPA1_HUMAN	Acyl-protein thioesterase 1	LYPLA1	108390000	132300000	111970000	129070000	174640000	149130000	183080000	147420000	0	0	0	0
O75610	LFTY1_HUMAN	Left-right determination factor 1	LEFTY1	0	0	0	0	0	55061000	0	0	0	0	0	0
O75616	ERAL1_HUMAN	GTPase Era, mitochondrial	ERAL1	22136000	14583000	36207000	25177000	39968000	37605000	21575000	30061000	25109000	31241000	20156000	32978000
O75643	U520_HUMAN	U5 small nuclear ribonucleoprotein 200 kDa helicase	SNRNP200	730570000	701850000	706090000	843170000	721180000	754530000	797570000	763310000	462620000	329820000	420380000	427030000
O75648	MTU1_HUMAN	Mitochondrial tRNA-specific 2-thiouridylase 1	TRMU	0	0	0	0	0	0	0	0	0	0	0	24637000
O75663	TIPRL_HUMAN	TIP41-like protein	TIPRL	93413000	150620000	97173000	81246000	38838000	52616000	64922000	82643000	0	0	0	0
O75683	SURF6_HUMAN	Surfeit locus protein 6	SURF6	30317000	0	0	0	0	0	0	0	0	0	0	0
O75688	PPM1B_HUMAN	Protein phosphatase 1B	PPM1B	167080000	163490000	193640000	183950000	215130000	267730000	273430000	352540000	0	0	0	0
O75691	UTP20_HUMAN	Small subunit processome component 20 homolog	UTP20	60903000	62766000	77057000	111720000	17745000	79291000	61734000	52800000	91225000	24990000	110810000	29652000
O75694	NU155_HUMAN	Nuclear pore complex protein Nup155	NUP155	191900000	179660000	176820000	174780000	173940000	151020000	277370000	204770000	18796000	0	0	0
O75695	XRP2_HUMAN	Protein XRP2	RP2	12758000	0	0	0	0	23633000	0	17921000	273420000	270980000	395910000	193420000
O75717	WDHD1_HUMAN	WD repeat and HMG-box DNA-binding protein 1	WDHD1	173520000	170300000	176060000	204180000	252500000	180290000	246930000	246660000	0	0	32738000	0
O75718	CRTAP_HUMAN	Cartilage-associated protein	CRTAP	47568000	29096000	49919000	35968000	44262000	52971000	42331000	54744000	22013000	21044000	26722000	0
O75746	CMC1_HUMAN	Calcium-binding mitochondrial carrier protein Aralar1	SLC25A12	13220000	0	0	0	0	0	0	0	115870000	105530000	176390000	114660000
O75787	RENR_HUMAN	Renin receptor	ATP6AP2	0	27680000	77912000	72172000	0	64724000	62656000	0	50445000	60057000	52708000	0
O75792	RNH2A_HUMAN	Ribonuclease H2 subunit A	RNASEH2A	19706000	0	0	16744000	13663000	17036000	12714000	14769000	0	0	0	0
O75794	CD123_HUMAN	Cell division cycle protein 123 homolog	CDC123	91161000	82071000	91509000	100480000	68017000	80719000	76537000	68538000	0	0	0	0
O75821	EIF3G_HUMAN	Eukaryotic translation initiation factor 3 subunit G	EIF3G	224170000	170080000	251060000	170930000	154790000	167160000	271710000	191460000	0	0	0	0
O75822	EIF3J_HUMAN	Eukaryotic translation initiation factor 3 subunit J	EIF3J	94839000	85441000	81584000	79297000	89993000	72517000	75855000	66736000	0	0	0	0
O75832	PSD10_HUMAN	26S proteasome non-ATPase regulatory subunit 10	PSMD10	30610000	19469000	23748000	31421000	33145000	19126000	79243000	0	0	0	0	0
O75843	AP1G2_HUMAN	AP-1 complex subunit gamma-like 2	AP1G2	0	0	0	0	0	0	0	4943400	0	0	0	0
O75844	FACE1_HUMAN	CAAX prenyl protease 1 homolog	ZMPSTE24	127390000	69654000	86925000	93764000	72370000	79763000	52463000	48359000	248330000	131460000	253440000	228270000
O75874	IDHC_HUMAN	Isocitrate dehydrogenase [NADP] cytoplasmic	IDH1	2289000000	2378600000	3118200000	2595400000	1717100000	1031500000	2083200000	1953800000	20350000	0	0	0
O75880	SCO1_HUMAN	Protein SCO1 homolog, mitochondrial	SCO1	87920000	113810000	111250000	107690000	102380000	126560000	101190000	125030000	150610000	107280000	136110000	100330000
O75909	CCNK_HUMAN	Cyclin-K	CCNK	7157300	16945000	11123000	13471000	14328000	12294000	13440000	11867000	0	0	0	0
O75915	PRAF3_HUMAN	PRA1 family protein 3	ARL6IP5	43201000	44059000	63585000	70806000	51297000	37420000	33885000	65307000	1389500000	460170000	596550000	1180600000
O75923	DYSF_HUMAN	Dysferlin	DYSF	0	0	0	0	0	0	0	0	1114100000	449160000	1250200000	914040000
O75934	SPF27_HUMAN	Pre-mRNA-splicing factor SPF27	BCAS2	47334000	38443000	0	18553000	0	23958000	26077000	20224000	0	0	0	0
O75935	DCTN3_HUMAN	Dynactin subunit 3	DCTN3	35036000	38694000	0	30843000	0	26622000	0	45072000	0	0	0	0
O75937	DNJC8_HUMAN	DnaJ homolog subfamily C member 8	DNAJC8	173350000	151900000	206210000	232540000	173990000	173570000	203930000	219170000	0	0	0	0
O75940	SPF30_HUMAN	Survival of motor neuron-related-splicing factor 30	SMNDC1	49281000	35770000	48568000	45957000	61008000	29435000	25888000	0	0	0	0	0
O75947	ATP5H_HUMAN	ATP synthase subunit d, mitochondrial	ATP5PD	222320000	184680000	139130000	171210000	193180000	200210000	218540000	232070000	129500000	132760000	159830000	78409000
O75953	DNJB5_HUMAN	DnaJ homolog subfamily B member 5	DNAJB5	0	0	0	0	21570000	0	18915000	17347000	0	0	0	0
O75954	TSN9_HUMAN	Tetraspanin-9	TSPAN9	0	0	0	0	0	0	0	0	7860100	0	6986600	11680000
O75955	FLOT1_HUMAN	Flotillin-1	FLOT1	160060000	138250000	168530000	131830000	200210000	171510000	182550000	140350000	1683600000	1026700000	1131600000	1207600000
O75962	TRIO_HUMAN	Triple functional domain protein	TRIO	0	0	0	7400900	14524000	0	4329800	3902300	177170000	64152000	270740000	49368000
O75964	ATP5L_HUMAN	ATP synthase subunit g, mitochondrial	ATP5MG	0	144190000	155710000	152830000	119430000	162560000	135660000	120810000	135950000	171080000	137910000	105210000
O75976	CBPD_HUMAN	Carboxypeptidase D	CPD	72217000	80704000	86856000	87202000	72374000	94494000	80942000	77892000	119840000	164360000	171660000	133180000
O76003	GLRX3_HUMAN	Glutaredoxin-3	GLRX3	483010000	572430000	518160000	497380000	749040000	555610000	556250000	534070000	0	0	0	0
O76021	RL1D1_HUMAN	Ribosomal L1 domain-containing protein 1	RSL1D1	452640000	593900000	452800000	526850000	348040000	363480000	376410000	427620000	314190000	57323000	230600000	191260000
O76024	WFS1_HUMAN	Wolframin	WFS1	0	0	0	0	0	0	0	0	37111000	0	79803000	0
O76031	CLPX_HUMAN	ATP-dependent Clp protease ATP-binding subunit clpX-like, mitochondrial	CLPX	126880000	120240000	119780000	107500000	104170000	105120000	116160000	122130000	161620000	152990000	140980000	157770000
O76062	ERG24_HUMAN	Delta(14)-sterol reductase TM7SF2	TM7SF2	0	0	0	0	0	0	0	0	0	0	0	5803900
O76071	CIAO1_HUMAN	Probable cytosolic iron-sulfur protein assembly protein CIAO1	CIAO1	0	0	0	12897000	13009000	12607000	13123000	15448000	0	0	0	0
O76074	PDE5A_HUMAN	cGMP-specific 3',5'-cyclic phosphodiesterase	PDE5A	0	0	0	0	0	0	444660	0	0	0	0	0
O76080	ZFAN5_HUMAN	AN1-type zinc finger protein 5	ZFAND5	10465000	0	4061200	0	0	0	0	0	0	0	0	0
O76094	SRP72_HUMAN	Signal recognition particle subunit SRP72	SRP72	122690000	118900000	139230000	156360000	113980000	112990000	160640000	122710000	132450000	98241000	94381000	104300000
O94760	DDAH1_HUMAN	N(G),N(G)-dimethylarginine dimethylaminohydrolase 1	DDAH1	106570000	98113000	123920000	86880000	134260000	207290000	201070000	207590000	0	0	0	0
O94763	RMP_HUMAN	Unconventional prefoldin RPB5 interactor 1	URI1	0	0	6760900	0	0	0	4259500	0	0	0	0	0
O94766	B3GA3_HUMAN	Galactosylgalactosylxylosylprotein 3-beta-glucuronosyltransferase 3	B3GAT3	0	0	0	0	0	0	0	0	24968000	23214000	41315000	0
O94776	MTA2_HUMAN	Metastasis-associated protein MTA2	MTA2	81637000	101090000	101870000	107120000	65120000	81860000	111420000	94514000	308730000	177040000	330780000	179590000
O94804	STK10_HUMAN	Serine/threonine-protein kinase 10	STK10	32748000	0	0	0	0	0	0	0	51296000	0	52759000	0
O94808	GFPT2_HUMAN	Glutamine--fructose-6-phosphate aminotransferase [isomerizing] 2	GFPT2	178140000	152420000	204510000	227690000	201030000	178770000	302800000	289900000	237130000	68709000	205350000	193930000
O94826	TOM70_HUMAN	Mitochondrial import receptor subunit TOM70	TOMM70	243700000	199750000	202330000	208360000	205340000	183610000	252790000	188200000	553510000	512130000	624200000	456540000
O94832	MYO1D_HUMAN	Unconventional myosin-Id	MYO1D	17394000	0	0	0	0	0	0	0	362800000	148560000	228340000	176470000
O94851	MICA2_HUMAN	[F-actin]-monooxygenase MICAL2	MICAL2	0	0	0	0	0	0	0	0	443720000	280320000	470230000	274690000
O94855	SC24D_HUMAN	Protein transport protein Sec24D	SEC24D	103380000	90309000	106590000	96365000	55573000	42301000	64310000	37746000	145680000	89274000	125940000	76146000
O94874	UFL1_HUMAN	E3 UFM1-protein ligase 1	UFL1	32821000	38286000	41922000	50516000	42175000	44792000	60916000	52240000	322430000	24495000	281300000	172410000
O94875	SRBS2_HUMAN	Sorbin and SH3 domain-containing protein 2	SORBS2	6378800	6784300	0	8383700	6696000	5924700	0	8164200	0	0	0	0
O94886	CSCL1_HUMAN	CSC1-like protein 1	TMEM63A	0	0	9121900	0	0	0	0	0	0	0	0	0
O94888	UBXN7_HUMAN	UBX domain-containing protein 7	UBXN7	43633000	57249000	42890000	55909000	62516000	42856000	47332000	40959000	0	0	0	0
O94901	SUN1_HUMAN	SUN domain-containing protein 1	SUN1	32736000	22837000	25779000	36760000	29007000	31353000	52521000	57125000	63242000	0	71436000	29494000
O94903	PLPHP_HUMAN	Pyridoxal phosphate homeostasis protein	PLPBP	69528000	60751000	49734000	59309000	56390000	70127000	91458000	75318000	0	0	0	0
O94905	ERLN2_HUMAN	Erlin-2	ERLIN2	249310000	211150000	186770000	222770000	97955000	62651000	172330000	160790000	1070600000	686700000	967710000	730710000
O94906	PRP6_HUMAN	Pre-mRNA-processing factor 6	PRPF6	127530000	64967000	196550000	153510000	119660000	125600000	156410000	136250000	56558000	0	43291000	28132000
O94913	PCF11_HUMAN	Pre-mRNA cleavage complex 2 protein Pcf11	PCF11	0	0	9798900	9520500	14370000	10880000	14367000	0	0	0	0	0
O94915	FRYL_HUMAN	Protein furry homolog-like	FRYL	0	0	0	0	0	0	0	0	44801000	41159000	46485000	40484000
O94919	ENDD1_HUMAN	Endonuclease domain-containing 1 protein	ENDOD1	0	0	0	0	0	0	0	0	287330000	259410000	186770000	235030000
O94923	GLCE_HUMAN	D-glucuronyl C5-epimerase	GLCE	43662000	0	0	0	0	0	0	0	573200000	514830000	710080000	573430000
O94925	GLSK_HUMAN	Glutaminase kidney isoform, mitochondrial	GLS	102630000	85175000	128660000	107890000	93057000	86840000	109650000	89543000	198020000	135220000	184380000	155300000
O94927	HAUS5_HUMAN	HAUS augmin-like complex subunit 5	HAUS5	13020000	0	0	13303000	14158000	10553000	13862000	12332000	0	0	0	0
O94929	ABLM3_HUMAN	Actin-binding LIM protein 3	ABLIM3	0	0	0	0	0	0	0	0	55218000	0	40681000	43610000
O94955	RHBT3_HUMAN	Rho-related BTB domain-containing protein 3	RHOBTB3	0	0	0	0	0	0	0	0	0	0	4141600	0
O94973	AP2A2_HUMAN	AP-2 complex subunit alpha-2	AP2A2	54760000	72946000	62415000	61039000	61957000	60244000	73375000	76655000	410350000	197600000	259640000	236970000
O94979	SC31A_HUMAN	Protein transport protein Sec31A	SEC31A	195850000	180480000	301930000	272990000	195250000	176210000	232020000	203770000	418470000	489570000	516450000	557960000
O95067	CCNB2_HUMAN	G2/mitotic-specific cyclin-B2	CCNB2	0	0	0	0	0	34751000	0	0	0	0	0	0
O95070	YIF1A_HUMAN	Protein YIF1A	YIF1A	0	0	0	0	0	0	0	0	115950000	0	0	0
O95071	UBR5_HUMAN	E3 ubiquitin-protein ligase UBR5	UBR5	83696000	39062000	86761000	74566000	66511000	48150000	40623000	64584000	18614000	0	0	0
O95084	PRS23_HUMAN	Serine protease 23	PRSS23	0	0	0	0	0	0	0	0	32665000	0	37742000	32033000
O95139	NDUB6_HUMAN	NADH dehydrogenase [ubiquinone] 1 beta subcomplex subunit 6	NDUFB6	51513000	0	0	156850000	0	44970000	0	0	121660000	112900000	49388000	76782000
O95140	MFN2_HUMAN	Mitofusin-2	MFN2	41726000	25738000	52386000	51392000	39214000	20788000	26443000	23663000	256940000	136430000	208100000	173940000
O95149	SPN1_HUMAN	Snurportin-1	SNUPN	0	0	16130000	20134000	0	0	0	0	0	0	0	0
O95155	UBE4B_HUMAN	Ubiquitin conjugation factor E4 B	UBE4B	0	0	14714000	8954300	12920000	0	12352000	17091000	0	0	0	0
O95159	ZFPL1_HUMAN	Zinc finger protein-like 1	ZFPL1	20713000	0	43951000	50270000	0	0	46190000	23740000	322400000	93664000	386800000	86916000
O95163	ELP1_HUMAN	Elongator complex protein 1	ELP1	63570000	44897000	74710000	65738000	72637000	62333000	64330000	81547000	61532000	0	51396000	35272000
O95166	GBRAP_HUMAN	Gamma-aminobutyric acid receptor-associated protein	GABARAP	0	0	0	0	0	0	0	33319000	68740000	0	0	0
O95168	NDUB4_HUMAN	NADH dehydrogenase [ubiquinone] 1 beta subcomplex subunit 4	NDUFB4	42755000	0	59708000	55992000	29470000	42172000	0	49010000	37119000	35586000	26607000	29635000
O95169	NDUB8_HUMAN	NADH dehydrogenase [ubiquinone] 1 beta subcomplex subunit 8, mitochondrial	NDUFB8	0	0	0	0	0	0	0	0	0	0	0	9576500
O95182	NDUA7_HUMAN	NADH dehydrogenase [ubiquinone] 1 alpha subcomplex subunit 7	NDUFA7	67657000	68804000	76835000	91835000	20306000	49893000	64491000	61966000	0	0	0	0
O95183	VAMP5_HUMAN	Vesicle-associated membrane protein 5	VAMP5	0	0	0	0	0	0	0	0	0	88581000	0	0
O95197	RTN3_HUMAN	Reticulon-3	RTN3	178310000	137050000	160940000	213280000	147440000	162790000	162340000	119030000	629950000	526700000	495280000	720730000
O95202	LETM1_HUMAN	Mitochondrial proton/calcium exchanger protein	LETM1	125950000	75072000	105900000	137260000	157410000	124200000	144590000	151420000	560860000	489660000	734350000	487590000
O95218	ZRAB2_HUMAN	Zinc finger Ran-binding domain-containing protein 2	ZRANB2	54500000	47715000	40966000	64569000	42828000	31857000	40253000	38523000	0	0	0	0
O95219	SNX4_HUMAN	Sorting nexin-4	SNX4	0	0	0	0	0	11690000	0	22724000	0	0	0	0
O95232	LC7L3_HUMAN	Luc7-like protein 3	LUC7L3	73556000	0	74265000	65118000	78098000	0	56393000	0	79149000	0	0	0
O95235	KI20A_HUMAN	Kinesin-like protein KIF20A	KIF20A	43622000	44760000	42658000	36387000	37917000	33155000	33622000	39701000	0	0	0	0
O95239	KIF4A_HUMAN	Chromosome-associated kinesin KIF4A	KIF4A	41243000	48082000	40544000	47911000	49916000	42780000	44204000	45348000	0	0	0	0
O95248	MTMR5_HUMAN	Myotubularin-related protein 5	SBF1	0	0	0	0	0	0	0	0	0	0	8049400	0
O95249	GOSR1_HUMAN	Golgi SNAP receptor complex member 1	GOSR1	0	0	47503000	41975000	38385000	26870000	36243000	39065000	32835000	0	36061000	30091000
O95251	KAT7_HUMAN	Histone acetyltransferase KAT7	KAT7	25196000	0	0	0	0	0	0	0	0	0	0	0
O95292	VAPB_HUMAN	Vesicle-associated membrane protein-associated protein B/C	VAPB	128100000	111950000	107100000	106320000	124920000	124790000	105480000	97390000	156710000	178040000	151050000	125650000
O95297	MPZL1_HUMAN	Myelin protein zero-like protein 1	MPZL1	40516000	0	0	0	0	0	0	0	128950000	94349000	111710000	0
O95298	NDUC2_HUMAN	NADH dehydrogenase [ubiquinone] 1 subunit C2	NDUFC2	54700000	94221000	104290000	94525000	32467000	34355000	29405000	64910000	65503000	50298000	67865000	60080000
O95299	NDUAA_HUMAN	NADH dehydrogenase [ubiquinone] 1 alpha subcomplex subunit 10, mitochondrial	NDUFA10	87553000	74009000	88458000	84050000	0	70914000	75435000	70094000	133190000	173540000	139230000	149500000
O95302	FKBP9_HUMAN	Peptidyl-prolyl cis-trans isomerase FKBP9	FKBP9	0	0	0	0	0	0	0	0	106300000	0	118600000	0
O95336	6PGL_HUMAN	6-phosphogluconolactonase	PGLS	54873000	48544000	44483000	43234000	80536000	85459000	85137000	94676000	0	0	0	0
O95340	PAPS2_HUMAN	Bifunctional 3'-phosphoadenosine 5'-phosphosulfate synthase 2	PAPSS2	14835000	0	5946400	9270000	0	0	15740000	0	354530000	245960000	221310000	233700000
O95347	SMC2_HUMAN	Structural maintenance of chromosomes protein 2	SMC2	183240000	146000000	196340000	220800000	138630000	117950000	229110000	216990000	94183000	40236000	130780000	70945000
O95359	TACC2_HUMAN	Transforming acidic coiled-coil-containing protein 2	TACC2	26754000	0	28249000	25886000	27035000	26431000	41929000	31853000	0	0	0	0
O95363	SYFM_HUMAN	Phenylalanine--tRNA ligase, mitochondrial	FARS2	0	0	0	0	0	0	0	911440	0	0	0	0
O95372	LYPA2_HUMAN	Acyl-protein thioesterase 2	LYPLA2	0	0	0	0	0	50964000	42002000	59298000	0	0	0	0
O95373	IPO7_HUMAN	Importin-7	IPO7	441060000	256300000	380940000	541990000	250970000	261820000	435160000	255270000	207190000	190330000	207300000	222590000
O95376	ARI2_HUMAN	E3 ubiquitin-protein ligase ARIH2	ARIH2	79228000	70071000	61382000	72717000	50021000	54305000	55119000	44096000	0	0	46430000	0
O95394	AGM1_HUMAN	Phosphoacetylglucosamine mutase	PGM3	72504000	86456000	79544000	54255000	51210000	47451000	57247000	63327000	79831000	0	93922000	102940000
O95400	CD2B2_HUMAN	CD2 antigen cytoplasmic tail-binding protein 2	CD2BP2	26507000	23302000	27311000	18898000	36818000	30394000	27508000	35834000	0	0	0	0
O95433	AHSA1_HUMAN	Activator of 90 kDa heat shock protein ATPase homolog 1	AHSA1	216710000	230040000	240240000	310190000	272830000	266550000	321740000	289740000	69290000	102540000	88149000	82454000
O95453	PARN_HUMAN	Poly(A)-specific ribonuclease PARN	PARN	39573000	32738000	29761000	26083000	40788000	34542000	23347000	29176000	0	0	0	0
O95456	PSMG1_HUMAN	Proteasome assembly chaperone 1	PSMG1	0	0	44686000	43199000	32437000	26852000	37714000	0	0	0	0	0
O95470	SGPL1_HUMAN	Sphingosine-1-phosphate lyase 1	SGPL1	58644000	0	60634000	95746000	12707000	13866000	35688000	20175000	65905000	32683000	76545000	32565000
O95476	CNEP1_HUMAN	CTD nuclear envelope phosphatase 1	CTDNEP1	0	0	0	0	0	0	0	0	16766000	0	0	0
O95478	NSA2_HUMAN	Ribosome biogenesis protein NSA2 homolog	NSA2	0	0	0	0	0	0	0	0	26520000	0	35421000	18350000
O95479	G6PE_HUMAN	GDH/6PGL endoplasmic bifunctional protein	H6PD	0	0	0	0	0	0	0	0	103550000	59120000	71661000	49893000
O95486	SC24A_HUMAN	Protein transport protein Sec24A	SEC24A	49069000	54106000	46710000	43358000	47251000	47643000	49643000	38159000	40817000	48854000	51811000	0
O95487	SC24B_HUMAN	Protein transport protein Sec24B	SEC24B	0	0	0	0	0	0	0	0	42811000	35650000	31508000	23132000
O95551	TYDP2_HUMAN	Tyrosyl-DNA phosphodiesterase 2	TDP2	0	0	0	0	0	0	0	6844700	0	0	0	0
O95563	MPC2_HUMAN	Mitochondrial pyruvate carrier 2	MPC2	29214000	0	19913000	18024000	0	0	0	21923000	27039000	6343600	75039000	41406000
O95571	ETHE1_HUMAN	Persulfide dioxygenase ETHE1, mitochondrial	ETHE1	0	0	0	0	0	0	23642000	22831000	31087000	0	42868000	0
O95573	ACSL3_HUMAN	Long-chain-fatty-acid--CoA ligase 3	ACSL3	293280000	293270000	361690000	279150000	393520000	272960000	283520000	239660000	648510000	413010000	524070000	343190000
O95602	RPA1_HUMAN	DNA-directed RNA polymerase I subunit RPA1	POLR1A	40657000	93400000	57632000	57335000	44177000	40398000	41617000	49636000	247430000	79151000	147570000	148880000
O95630	STABP_HUMAN	STAM-binding protein	STAMBP	0	0	14485000	14558000	0	18797000	20435000	27729000	0	0	0	0
O95639	CPSF4_HUMAN	Cleavage and polyadenylation specificity factor subunit 4	CPSF4	0	0	0	11931000	0	0	0	0	0	0	0	0
O95671	ASML_HUMAN	Probable bifunctional dTTP/UTP pyrophosphatase/methyltransferase protein	ASMTL	126730000	153040000	230130000	189670000	142640000	153780000	179130000	234830000	0	0	0	0
O95674	CDS2_HUMAN	Phosphatidate cytidylyltransferase 2	CDS2	21437000	0	18331000	15615000	0	0	0	0	181410000	46591000	107230000	16104000
O95707	RPP29_HUMAN	Ribonuclease P protein subunit p29	POP4	0	0	0	0	0	0	0	0	0	0	13417000	0
O95714	HERC2_HUMAN	E3 ubiquitin-protein ligase HERC2	HERC2	0	0	15292000	13183000	14441000	13148000	14829000	14699000	25252000	0	0	0
O95716	RAB3D_HUMAN	Ras-related protein Rab-3D	RAB3D	10296000	0	24935000	0	0	0	0	0	95767000	0	83945000	68629000
O95747	OXSR1_HUMAN	Serine/threonine-protein kinase OSR1	OXSR1	34610000	24516000	0	32748000	32476000	27343000	24423000	25847000	0	0	0	0
O95757	HS74L_HUMAN	Heat shock 70 kDa protein 4L	HSPA4L	0	0	0	0	0	0	0	0	26851000	20968000	20205000	18470000
O95758	PTBP3_HUMAN	Polypyrimidine tract-binding protein 3	PTBP3	88963000	86347000	97279000	63986000	27512000	67675000	69082000	103830000	26589000	0	36210000	0
O95772	STR3N_HUMAN	STARD3 N-terminal-like protein	STARD3NL	0	0	0	0	0	0	0	0	0	0	157260000	198450000
O95777	LSM8_HUMAN	U6 snRNA-associated Sm-like protein LSm8	LSM8	0	0	0	9240900	0	7660900	8120400	7324400	0	0	0	0
O95782	AP2A1_HUMAN	AP-2 complex subunit alpha-1	AP2A1	401430000	277330000	349540000	405390000	544850000	396050000	471190000	373440000	819900000	847900000	827140000	725410000
O95785	WIZ_HUMAN	Protein Wiz	WIZ	0	0	5721700	5438400	7438400	8591000	6842100	4657300	0	0	0	0
O95786	DDX58_HUMAN	Antiviral innate immune response receptor RIG-I	DDX58	0	0	0	0	0	0	0	0	63038000	62294000	49897000	59598000
O95793	STAU1_HUMAN	Double-stranded RNA-binding protein Staufen homolog 1	STAU1	143660000	156130000	208300000	154800000	81451000	92306000	163490000	94258000	54793000	51703000	90333000	58483000
O95801	TTC4_HUMAN	Tetratricopeptide repeat protein 4	TTC4	0	0	37085000	36015000	0	0	0	39408000	0	0	0	0
O95810	CAVN2_HUMAN	Caveolae-associated protein 2	CAVIN2	0	0	0	0	0	0	0	0	279210000	249910000	260430000	176600000
O95813	CER1_HUMAN	Cerberus	CER1	0	0	0	0	0	0	0	4856400	0	0	0	0
O95816	BAG2_HUMAN	BAG family molecular chaperone regulator 2	BAG2	98045000	85095000	99364000	105250000	118870000	109460000	134680000	73725000	0	0	0	0
O95817	BAG3_HUMAN	BAG family molecular chaperone regulator 3	BAG3	64678000	64611000	55962000	40519000	72307000	63525000	71660000	68971000	0	0	0	0
O95825	QORL1_HUMAN	Quinone oxidoreductase-like protein 1	CRYZL1	0	0	0	9708900	9619700	0	10083000	0	0	0	0	0
O95831	AIFM1_HUMAN	Apoptosis-inducing factor 1, mitochondrial	AIFM1	233850000	286610000	354950000	242660000	275790000	266550000	273990000	316460000	468700000	254490000	399150000	278040000
O95837	GNA14_HUMAN	Guanine nucleotide-binding protein subunit alpha-14	GNA14	0	12554000	16710000	11398000	26115000	21225000	20931000	16641000	0	0	0	0
O95861	BPNT1_HUMAN	3'(2'),5'-bisphosphate nucleotidase 1	BPNT1	46681000	30130000	46619000	54644000	39914000	34333000	44646000	48323000	0	0	0	0
O95864	FADS2_HUMAN	Acyl-CoA 6-desaturase	FADS2	229230000	228770000	277720000	271520000	286380000	235280000	234960000	214150000	255670000	203860000	213270000	252320000
O95865	DDAH2_HUMAN	N(G),N(G)-dimethylarginine dimethylaminohydrolase 2	DDAH2	13833000	15086000	11300000	15712000	0	17115000	16994000	20260000	0	0	0	0
O95870	ABHGA_HUMAN	Phosphatidylserine lipase ABHD16A	ABHD16A	95480000	0	0	0	0	0	0	0	103570000	50558000	70687000	62191000
O95881	TXD12_HUMAN	Thioredoxin domain-containing protein 12	TXNDC12	0	0	0	0	78294000	72552000	76267000	134290000	0	0	0	0
O95897	NOE2_HUMAN	Noelin-2	OLFM2	7389300	5567400	0	0	0	0	0	0	0	0	0	0
O95905	ECD_HUMAN	Protein ecdysoneless homolog	ECD	35695000	0	29448000	30018000	38160000	0	55364000	37300000	0	0	0	0
O95980	RECK_HUMAN	Reversion-inducing cysteine-rich protein with Kazal motifs	RECK	0	0	0	0	0	0	0	0	17602000	0	0	0
O95983	MBD3_HUMAN	Methyl-CpG-binding domain protein 3	MBD3	28863000	0	22779000	18325000	27179000	24617000	17312000	20574000	0	0	0	0
O96000	NDUBA_HUMAN	NADH dehydrogenase [ubiquinone] 1 beta subcomplex subunit 10	NDUFB10	99641000	127880000	107000000	112970000	129840000	84348000	130180000	127520000	107000000	224080000	136800000	127970000
O96005	CLPT1_HUMAN	Cleft lip and palate transmembrane protein 1	CLPTM1	46368000	0	0	0	0	0	0	0	395680000	199410000	258360000	234200000
O96008	TOM40_HUMAN	Mitochondrial import receptor subunit TOM40 homolog	TOMM40	85054000	100740000	138220000	138140000	85389000	79332000	84062000	71197000	72126000	91108000	65315000	100950000
O96011	PX11B_HUMAN	Peroxisomal membrane protein 11B	PEX11B	0	0	0	0	0	0	0	0	70870000	85240000	118350000	92268000
O96013	PAK4_HUMAN	Serine/threonine-protein kinase PAK 4	PAK4	20987000	21303000	21500000	20668000	0	0	18194000	22482000	0	0	0	0
O96017	CHK2_HUMAN	Serine/threonine-protein kinase Chk2	CHEK2	0	0	0	0	0	0	0	16699000	0	0	0	0
O96019	ACL6A_HUMAN	Actin-like protein 6A	ACTL6A	185490000	151790000	244950000	232770000	109970000	164540000	197070000	194810000	0	0	24603000	0
P00338	LDHA_HUMAN	L-lactate dehydrogenase A chain	LDHA	4380800000	3139200000	2478300000	3446800000	2927900000	2800700000	2906100000	3120700000	1749800000	1330200000	2214400000	2029000000
P00367	DHE3_HUMAN	Glutamate dehydrogenase 1, mitochondrial	GLUD1	628710000	542700000	681220000	653020000	618350000	620110000	675650000	590010000	1873900000	2079500000	1802400000	1882000000
P00374	DYR_HUMAN	Dihydrofolate reductase	DHFR	34278000	0	34156000	35656000	31997000	29530000	29664000	30430000	0	0	0	0
P00387	NB5R3_HUMAN	NADH-cytochrome b5 reductase 3	CYB5R3	270520000	311100000	234090000	218400000	298860000	359080000	258130000	307120000	2526000000	1683300000	2044100000	2017100000
P00390	GSHR_HUMAN	Glutathione reductase, mitochondrial	GSR	163680000	188750000	301840000	303870000	237830000	186980000	385630000	237630000	0	0	0	0
P00403	COX2_HUMAN	Cytochrome c oxidase subunit 2	MT-CO2	144540000	189280000	160970000	186580000	171430000	199620000	160660000	119470000	296640000	156560000	141590000	254140000
P00441	SODC_HUMAN	Superoxide dismutase [Cu-Zn]	SOD1	287720000	280540000	271560000	348510000	230420000	308150000	331590000	606090000	0	0	0	0
P00491	PNPH_HUMAN	Purine nucleoside phosphorylase	PNP	424350000	248470000	391320000	401550000	462030000	350110000	282300000	284890000	0	0	73122000	0
P00492	HPRT_HUMAN	Hypoxanthine-guanine phosphoribosyltransferase	HPRT1	172660000	135770000	130600000	125570000	137710000	135140000	105630000	108440000	0	0	32530000	0
P00505	AATM_HUMAN	Aspartate aminotransferase, mitochondrial	GOT2	1096100000	1128300000	1064500000	1478400000	887830000	1022900000	1140300000	1176000000	2620600000	2430600000	2634200000	2335300000
P00558	PGK1_HUMAN	Phosphoglycerate kinase 1	PGK1	2132100000	3219300000	2633600000	2577000000	2051700000	2913300000	3994700000	3968700000	532080000	359300000	539260000	381430000
P00568	KAD1_HUMAN	Adenylate kinase isoenzyme 1	AK1	53864000	31778000	23813000	0	36297000	30329000	26101000	0	19307000	15515000	0	0
P00749	UROK_HUMAN	Urokinase-type plasminogen activator	PLAU	0	0	0	0	0	0	0	0	0	0	0	18244000
P00750	TPA_HUMAN	Tissue-type plasminogen activator	PLAT	0	0	0	0	0	0	0	0	356020000	119180000	358420000	220330000
P00813	ADA_HUMAN	Adenosine deaminase	ADA	32255000	23893000	24570000	29164000	0	24638000	22106000	20763000	0	0	0	0
P00846	ATP6_HUMAN	ATP synthase subunit a	MT-ATP6	0	0	0	0	0	0	0	0	0	0	0	108830000
P00918	CAH2_HUMAN	Carbonic anhydrase 2	CA2	18194000	19772000	15367000	0	0	14520000	12413000	21336000	0	0	0	0
P00966	ASSY_HUMAN	Argininosuccinate synthase	ASS1	105210000	83552000	74262000	69952000	66720000	65310000	73870000	66997000	0	0	0	0
P01033	TIMP1_HUMAN	Metalloproteinase inhibitor 1	TIMP1	0	0	0	0	0	0	0	0	0	32465000	0	0
P01034	CYTC_HUMAN	Cystatin-C	CST3	0	0	0	0	0	0	0	0	0	0	0	36477000
P01111	RASN_HUMAN	GTPase NRas	NRAS	35095000	33410000	0	0	34636000	0	35996000	33708000	67605000	81170000	64633000	0
P01112	RASH_HUMAN	GTPase HRas	HRAS	84404000	107750000	123380000	0	93017000	47304000	83696000	58478000	464200000	464050000	490180000	468670000
P01116	RASK_HUMAN	GTPase KRas	KRAS	0	0	0	0	0	0	0	0	19511000	0	0	0
P01130	LDLR_HUMAN	Low-density lipoprotein receptor	LDLR	0	0	0	0	0	0	0	37273000	97059000	0	56169000	62525000
P01137	TGFB1_HUMAN	Transforming growth factor beta-1 proprotein	TGFB1	0	0	0	0	0	0	0	0	39128000	38463000	0	27885000
P02452	CO1A1_HUMAN	Collagen alpha-1(I) chain	COL1A1	0	0	0	0	10916000	19453000	14005000	13986000	0	924940000	0	0
P02545	LMNA_HUMAN	Prelamin-A/C	LMNA	864210000	786110000	1034200000	1078800000	2324600000	2255700000	3198300000	2642300000	3610000000	3602400000	4690900000	3260700000
P02649	APOE_HUMAN	Apolipoprotein E	APOE	772270000	531160000	888220000	838310000	523570000	460980000	599240000	565410000	0	0	0	0
P02751	FINC_HUMAN	Fibronectin	FN1	4049900	0	21413000	3562400	3398300	4668800	2274400	2378300	752030000	136310000	703390000	151290000
P02786	TFR1_HUMAN	Transferrin receptor protein 1	TFRC	620650000	577960000	632410000	784700000	639090000	474570000	528790000	476330000	2100200000	1535900000	2022700000	1928700000
P02787	TRFE_HUMAN	Serotransferrin	TF	364760000	321850000	343530000	379630000	370960000	293240000	383200000	448710000	0	0	0	0
P02792	FRIL_HUMAN	Ferritin light chain	FTL	0	0	0	0	0	0	0	23272000	0	0	0	0
P02794	FRIH_HUMAN	Ferritin heavy chain	FTH1	53082000	0	0	0	30319000	27385000	51219000	33651000	0	0	0	0
P02795	MT2_HUMAN	Metallothionein-2	MT2A	3759200	5057500	1533700	24370000	3153700	2415700	1801100	1904800	0	0	0	0
P03897	NU3M_HUMAN	NADH-ubiquinone oxidoreductase chain 3	MT-ND3	0	0	0	0	0	0	0	0	0	0	4035100	0
P03956	MMP1_HUMAN	Interstitial collagenase	MMP1	0	0	0	0	0	0	0	0	158940000	151350000	165360000	166960000
P04004	VTNC_HUMAN	Vitronectin	VTN	309550000	367580000	220700000	234970000	432710000	234400000	336790000	324690000	0	0	0	0
P04035	HMDH_HUMAN	3-hydroxy-3-methylglutaryl-coenzyme A reductase	HMGCR	0	0	0	19522000	0	23432000	22724000	18041000	0	0	0	0
P04040	CATA_HUMAN	Catalase	CAT	24703000	0	0	0	0	0	0	0	413070000	251060000	464170000	271310000
P04049	RAF1_HUMAN	RAF proto-oncogene serine/threonine-protein kinase	RAF1	33656000	0	37808000	55457000	0	0	0	0	24228000	44375000	27441000	0
P04062	GLCM_HUMAN	Lysosomal acid glucosylceramidase	GBA	14372000	11817000	12909000	12841000	33070000	18999000	19524000	0	314140000	132920000	190070000	150090000
P04075	ALDOA_HUMAN	Fructose-bisphosphate aldolase A	ALDOA	2676800000	3274700000	4472300000	4544500000	3345900000	3261800000	4861800000	3967100000	1049200000	956980000	1669100000	304830000
P04080	CYTB_HUMAN	Cystatin-B	CSTB	176130000	223450000	216210000	191690000	191780000	163930000	191260000	204190000	0	0	0	0
P04083	ANXA1_HUMAN	Annexin A1	ANXA1	711330000	596800000	568890000	871870000	3563300000	3895100000	5068900000	4602000000	95973000	180680000	164510000	105690000
P04114	APOB_HUMAN	Apolipoprotein B-100	APOB	0	0	0	0	0	0	0	0	0	31302000	50369000	53612000
P04156	PRIO_HUMAN	Major prion protein	PRNP	0	0	0	0	0	0	0	0	0	0	0	40635000
P04179	SODM_HUMAN	Superoxide dismutase [Mn], mitochondrial	SOD2	63262000	0	96254000	111930000	73256000	69365000	75859000	48068000	0	0	11915000	0
P04181	OAT_HUMAN	Ornithine aminotransferase, mitochondrial	OAT	295190000	378330000	354500000	355030000	216560000	304260000	281370000	267940000	644990000	737500000	704490000	707610000
P04183	KITH_HUMAN	Thymidine kinase, cytosolic	TK1	69469000	78971000	76163000	74992000	83998000	89666000	79836000	72417000	0	0	0	0
P04216	THY1_HUMAN	Thy-1 membrane glycoprotein	THY1	208270000	151960000	186770000	180180000	137620000	143240000	168770000	124840000	0	0	0	0
P04264	K2C1_HUMAN	Keratin, type II cytoskeletal 1	KRT1	6668100000	6746600000	3387800000	1334300000	5443200000	11072000000	5128600000	6070100000	3784000000	6992000000	8644600000	2984300000
P04275	VWF_HUMAN	von Willebrand factor	VWF	0	0	0	0	0	0	0	0	1265000000	1494300000	1262800000	1308300000
P04350	TBB4A_HUMAN	Tubulin beta-4A chain	TUBB4A	38257000	48992000	38621000	39361000	97320000	116390000	65001000	42468000	0	0	0	0
P04406	G3P_HUMAN	Glyceraldehyde-3-phosphate dehydrogenase	GAPDH	13150000000	16021000000	15706000000	15619000000	10225000000	12324000000	13302000000	13719000000	18507000000	14527000000	15553000000	17124000000
P04424	ARLY_HUMAN	Argininosuccinate lyase	ASL	0	0	0	0	20918000	0	20326000	22533000	0	0	0	0
P04439	HLAA_HUMAN	HLA class I histocompatibility antigen, A alpha chain	HLA-A	57383000	45654000	49636000	41355000	0	0	0	0	220050000	278120000	218770000	286940000
P04626	ERBB2_HUMAN	Receptor tyrosine-protein kinase erbB-2	ERBB2	98352000	85354000	106160000	120840000	63295000	54375000	59654000	55722000	0	0	0	0
P04632	CPNS1_HUMAN	Calpain small subunit 1	CAPNS1	171930000	107030000	121050000	132950000	261900000	275360000	277410000	284220000	0	0	0	0
P04792	HSPB1_HUMAN	Heat shock protein beta-1	HSPB1	99710000	64505000	105110000	110420000	291500000	250690000	204780000	240700000	590170000	443360000	519940000	428880000
P04818	TYSY_HUMAN	Thymidylate synthase	TYMS	0	14279000	0	14144000	17959000	18456000	35442000	18856000	0	0	0	0
P04843	RPN1_HUMAN	Dolichyl-diphosphooligosaccharide--protein glycosyltransferase subunit 1	RPN1	1403300000	1082600000	1260500000	1290600000	1018600000	1152400000	976610000	975980000	5401800000	4949800000	5529000000	5599000000
P04844	RPN2_HUMAN	Dolichyl-diphosphooligosaccharide--protein glycosyltransferase subunit 2	RPN2	437070000	421560000	462410000	464250000	383910000	365370000	333380000	376020000	1022600000	934990000	1007500000	1390000000
P04899	GNAI2_HUMAN	Guanine nucleotide-binding protein G(i) subunit alpha-2	GNAI2	561640000	485660000	483880000	570270000	641700000	707120000	673380000	665290000	3639600000	3617100000	2264300000	3196100000
P04920	B3A2_HUMAN	Anion exchange protein 2	SLC4A2	0	0	0	0	0	0	0	0	42516000	37374000	44188000	38112000
P05023	AT1A1_HUMAN	Sodium/potassium-transporting ATPase subunit alpha-1	ATP1A1	1271500000	1256000000	1127800000	1473500000	1435200000	1376000000	1535300000	1470000000	7036200000	6187900000	6877600000	6852000000
P05026	AT1B1_HUMAN	Sodium/potassium-transporting ATPase subunit beta-1	ATP1B1	35755000	0	69890000	69324000	128420000	89915000	78910000	128620000	273900000	131830000	367380000	104730000
P05067	A4_HUMAN	Amyloid-beta precursor protein	APP	62918000	98890000	87789000	115330000	46320000	38589000	69609000	74509000	131020000	90411000	166320000	64358000
P05089	ARGI1_HUMAN	Arginase-1	ARG1	0	0	0	0	0	0	0	0	0	0	12739000	0
P05091	ALDH2_HUMAN	Aldehyde dehydrogenase, mitochondrial	ALDH2	243940000	239450000	263650000	334610000	291200000	312240000	406840000	300980000	736570000	581080000	646350000	540910000
P05106	ITB3_HUMAN	Integrin beta-3	ITGB3	0	0	0	0	0	0	0	0	1121900000	493640000	1121400000	298580000
P05109	S10A8_HUMAN	Protein S100-A8	S100A8	0	0	0	0	0	25839000	0	0	0	0	0	0
P05121	PAI1_HUMAN	Plasminogen activator inhibitor 1	SERPINE1	0	0	0	0	108160000	0	63984000	52689000	809590000	417500000	1824000000	458800000
P05141	ADT2_HUMAN	ADP/ATP translocase 2	SLC25A5	2754100000	2429600000	2284400000	2611500000	2888200000	2542900000	2791800000	2701100000	7692000000	5878800000	6148000000	7909900000
P05161	ISG15_HUMAN	Ubiquitin-like protein ISG15	ISG15	0	0	0	0	0	0	0	0	0	0	14030000	0
P05165	PCCA_HUMAN	Propionyl-CoA carboxylase alpha chain, mitochondrial	PCCA	76752000	56984000	51689000	52952000	63873000	59430000	84488000	45719000	71110000	51575000	63101000	53553000
P05166	PCCB_HUMAN	Propionyl-CoA carboxylase beta chain, mitochondrial	PCCB	42348000	0	33680000	40086000	40724000	47510000	27602000	42728000	0	0	0	0
P05186	PPBT_HUMAN	Alkaline phosphatase, tissue-nonspecific isozyme	ALPL	315990000	267860000	286390000	255710000	213270000	256030000	238790000	164980000	0	0	0	0
P05198	IF2A_HUMAN	Eukaryotic translation initiation factor 2 subunit 1	EIF2S1	654160000	589580000	516350000	576100000	801580000	620780000	730470000	688970000	95996000	0	114970000	99096000
P05386	RLA1_HUMAN	60S acidic ribosomal protein P1	RPLP1	0	0	0	0	0	0	114380000	0	30969000	0	11372000	0
P05387	RLA2_HUMAN	60S acidic ribosomal protein P2	RPLP2	1283100000	948880000	966860000	895380000	1456900000	1272500000	1657800000	1353300000	100590000	67258000	47922000	61546000
P05388	RLA0_HUMAN	60S acidic ribosomal protein P0	RPLP0	1961000000	1697300000	1595200000	1469700000	2070000000	1651600000	1421400000	1274100000	2281100000	2275000000	2106500000	1923400000
P05413	FABPH_HUMAN	Fatty acid-binding protein, heart	FABP3	0	22921000	28197000	0	25129000	24041000	25990000	34176000	0	0	0	0
P05455	LA_HUMAN	Lupus La protein	SSB	820680000	706520000	1283800000	1478700000	865560000	688050000	868110000	611080000	0	0	141880000	0
P05556	ITB1_HUMAN	Integrin beta-1	ITGB1	657920000	523280000	560440000	559510000	761740000	684650000	820660000	815570000	6817900000	5413100000	5657100000	4549000000
P05783	K1C18_HUMAN	Keratin, type I cytoskeletal 18	KRT18	2832500000	2523900000	2796300000	2800000000	3794200000	3474600000	4962800000	4798500000	351330000	235950000	407170000	188210000
P05997	CO5A2_HUMAN	Collagen alpha-2(V) chain	COL5A2	0	0	0	23981000	0	0	0	0	0	0	70033000	0
P06132	DCUP_HUMAN	Uroporphyrinogen decarboxylase	UROD	66233000	50984000	54657000	45380000	60805000	58668000	53252000	52562000	0	0	0	0
P06239	LCK_HUMAN	Tyrosine-protein kinase Lck	LCK	11778000	9208300	0	10366000	0	0	0	9356600	0	0	0	0
P06241	FYN_HUMAN	Tyrosine-protein kinase Fyn	FYN	0	0	0	0	0	0	0	0	117730000	68958000	89511000	51094000
P06280	AGAL_HUMAN	Alpha-galactosidase A	GLA	0	22322000	0	24095000	22877000	19996000	0	20178000	0	0	0	0
P06396	GELS_HUMAN	Gelsolin	GSN	57742000	12179000	115110000	110490000	29694000	45702000	39849000	45463000	27187000	7782900	37615000	19096000
P06493	CDK1_HUMAN	Cyclin-dependent kinase 1	CDK1	541920000	488830000	704220000	714980000	539120000	526940000	542200000	620430000	281750000	323370000	337490000	312570000
P06576	ATPB_HUMAN	ATP synthase subunit beta, mitochondrial	ATP5F1B	4387000000	3795200000	4235500000	3963900000	4785400000	4528400000	3518600000	4148500000	4268900000	4781800000	4370600000	3679400000
P06730	IF4E_HUMAN	Eukaryotic translation initiation factor 4E	EIF4E	208650000	202520000	262240000	300810000	217940000	199550000	246540000	326010000	0	0	42812000	0
P06733	ENOA_HUMAN	Alpha-enolase	ENO1	10852000000	10128000000	13007000000	13698000000	10117000000	10473000000	14832000000	14201000000	1094100000	1208600000	1291900000	1280800000
P06737	PYGL_HUMAN	Glycogen phosphorylase, liver form	PYGL	146940000	102210000	146440000	105930000	150090000	156360000	259820000	224050000	30611000	0	0	31436000
P06744	G6PI_HUMAN	Glucose-6-phosphate isomerase	GPI	2151700000	1701000000	1898000000	2132200000	1746300000	1537600000	2021700000	2014000000	174020000	170030000	245940000	86019000
P06748	NPM_HUMAN	Nucleophosmin	NPM1	5005400000	3431600000	5056300000	6092700000	2802600000	3824800000	4879900000	4797500000	399070000	310680000	224890000	180600000
P06756	ITAV_HUMAN	Integrin alpha-V	ITGAV	33423000	23074000	48754000	28249000	88002000	83069000	74316000	95281000	482570000	386880000	549150000	294800000
P06865	HEXA_HUMAN	Beta-hexosaminidase subunit alpha	HEXA	57836000	52629000	28880000	43666000	40039000	38746000	36408000	51621000	106790000	77831000	0	0
P07093	GDN_HUMAN	Glia-derived nexin	SERPINE2	19253000	14016000	12584000	17625000	27854000	27062000	24246000	36132000	0	0	0	0
P07099	HYEP_HUMAN	Epoxide hydrolase 1	EPHX1	261030000	245240000	244320000	250010000	235260000	208780000	232920000	215170000	355100000	302970000	363160000	427110000
P07195	LDHB_HUMAN	L-lactate dehydrogenase B chain	LDHB	7811500000	7658000000	7176500000	6954100000	7465800000	7050100000	6584500000	6702400000	1178000000	673110000	1261900000	730320000
P07199	CENPB_HUMAN	Major centromere autoantigen B	CENPB	0	0	0	0	0	0	91886000	0	0	0	0	0
P07203	GPX1_HUMAN	Glutathione peroxidase 1	GPX1	86881000	59960000	61287000	87692000	99753000	92041000	76959000	96498000	116050000	106650000	120690000	87975000
P07305	H10_HUMAN	Histone H1.0	H1-0	57396000	0	49238000	39980000	0	139600000	129350000	173710000	0	0	0	38022000
P07311	ACYP1_HUMAN	Acylphosphatase-1	ACYP1	0	11281000	11850000	0	0	9852400	0	10273000	0	0	0	0
P07339	CATD_HUMAN	Cathepsin D	CTSD	452450000	398260000	382120000	409570000	369520000	337430000	437310000	390080000	350480000	289210000	398990000	345030000
P07355	ANXA2_HUMAN	Annexin A2	ANXA2	3476900000	2818200000	3400700000	3301100000	7392800000	7534100000	6636300000	6066400000	8948900000	8891500000	10955000000	7498200000
P07384	CAN1_HUMAN	Calpain-1 catalytic subunit	CAPN1	207360000	240610000	250150000	260810000	182560000	178360000	241450000	221820000	113130000	115570000	127880000	108160000
P07437	TBB5_HUMAN	Tubulin beta chain	TUBB	1858100000	1763300000	2590900000	2622200000	2879800000	3406600000	2793600000	2354000000	895050000	1764000000	1285000000	1508900000
P07602	SAP_HUMAN	Prosaposin	PSAP	0	0	27353000	34623000	23020000	0	0	17810000	0	0	0	0
P07686	HEXB_HUMAN	Beta-hexosaminidase subunit beta	HEXB	65371000	77087000	78016000	75658000	75078000	94544000	78391000	84116000	212600000	145620000	223710000	150170000
P07711	CATL1_HUMAN	Procathepsin L	CTSL	0	0	0	10261000	0	12704000	11725000	0	0	0	0	0
P07737	PROF1_HUMAN	Profilin-1	PFN1	4715800000	5429600000	4842800000	4658200000	6701800000	6165900000	5857100000	5531300000	180930000	152010000	147440000	122200000
P07738	PMGE_HUMAN	Bisphosphoglycerate mutase	BPGM	0	0	0	34607000	0	0	0	0	0	0	0	0
P07741	APT_HUMAN	Adenine phosphoribosyltransferase	APRT	514490000	433070000	292380000	400490000	334250000	425190000	316870000	419460000	37630000	62651000	0	0
P07814	SYEP_HUMAN	Bifunctional glutamate/proline--tRNA ligase	EPRS1	1412600000	1562100000	1726400000	1916400000	1176200000	1249100000	1500400000	1402700000	2996100000	2039000000	3744500000	2382700000
P07858	CATB_HUMAN	Cathepsin B	CTSB	30122000	0	0	0	114870000	0	104710000	117770000	626010000	735660000	631970000	466370000
P07900	HS90A_HUMAN	Heat shock protein HSP 90-alpha	HSP90AA1	6043700000	4734900000	6627600000	6562300000	6022500000	5427200000	6609400000	5961900000	4353700000	3463700000	4014300000	3888400000
P07942	LAMB1_HUMAN	Laminin subunit beta-1	LAMB1	12089000	4743100	0	19868000	59167000	57985000	126040000	87620000	397600000	148440000	325000000	100560000
P07947	YES_HUMAN	Tyrosine-protein kinase Yes	YES1	78485000	0	145420000	0	132380000	65222000	133730000	117380000	1424200000	722970000	931330000	827700000
P07948	LYN_HUMAN	Tyrosine-protein kinase Lyn	LYN	26739000	28640000	39288000	45584000	57335000	53895000	33604000	30060000	74787000	57731000	74374000	52972000
P07954	FUMH_HUMAN	Fumarate hydratase, mitochondrial	FH	88545000	119650000	156920000	141080000	126940000	87544000	149750000	107440000	146650000	85581000	105690000	64694000
P07996	TSP1_HUMAN	Thrombospondin-1	THBS1	3830200	12704000	0	0	4421200	21449000	19214000	19193000	2790100000	1991800000	2941500000	2201300000
P08069	IGF1R_HUMAN	Insulin-like growth factor 1 receptor	IGF1R	31151000	34737000	26672000	12318000	0	34895000	11845000	14743000	0	0	0	0
P08123	CO1A2_HUMAN	Collagen alpha-2(I) chain	COL1A2	5845500	0	0	0	9487000	5036300	7626500	10617000	0	373040000	0	0
P08133	ANXA6_HUMAN	Annexin A6	ANXA6	618590000	356260000	500610000	924320000	558200000	576520000	516900000	582170000	173200000	65543000	190270000	158280000
P08134	RHOC_HUMAN	Rho-related GTP-binding protein RhoC	RHOC	0	0	0	19079000	0	30679000	38960000	45272000	205440000	232890000	101180000	226120000
P08174	DAF_HUMAN	Complement decay-accelerating factor	CD55	0	0	0	0	0	0	0	0	101450000	86329000	80055000	76639000
P08183	MDR1_HUMAN	ATP-dependent translocase ABCB1	ABCB1	0	0	0	0	0	0	0	0	32191000	0	25767000	19737000
P08195	4F2_HUMAN	4F2 cell-surface antigen heavy chain	SLC3A2	2586800000	2012500000	2220700000	2829000000	2008100000	1894100000	1931100000	1961500000	453460000	462860000	514210000	519830000
P08236	BGLR_HUMAN	Beta-glucuronidase	GUSB	0	0	0	0	0	0	0	6377500	0	0	0	0
P08237	PFKAM_HUMAN	ATP-dependent 6-phosphofructokinase, muscle type	PFKM	154770000	179680000	368550000	317400000	184260000	132820000	195200000	160740000	473860000	191990000	270190000	327770000
P08238	HS90B_HUMAN	Heat shock protein HSP 90-beta	HSP90AB1	20555000000	21523000000	23509000000	22208000000	21070000000	20242000000	22189000000	24189000000	17224000000	17058000000	17629000000	15981000000
P08240	SRPRA_HUMAN	Signal recognition particle receptor subunit alpha	SRPRA	108240000	100820000	99713000	84384000	46211000	52669000	73696000	72787000	590060000	226880000	565420000	310780000
P08243	ASNS_HUMAN	Asparagine synthetase [glutamine-hydrolyzing]	ASNS	898190000	770030000	776130000	901460000	816290000	636620000	690540000	857060000	0	0	0	0
P08253	MMP2_HUMAN	72 kDa type IV collagenase	MMP2	0	0	0	0	0	0	0	0	0	0	17325000	21131000
P08397	HEM3_HUMAN	Porphobilinogen deaminase	HMBS	98086000	78425000	83505000	87212000	125790000	73543000	76265000	73464000	0	0	0	0
P08473	NEP_HUMAN	Neprilysin	MME	46630000	0	61979000	38581000	26043000	20403000	21442000	0	0	0	0	0
P08559	ODPA_HUMAN	Pyruvate dehydrogenase E1 component subunit alpha, somatic form, mitochondrial	PDHA1	198940000	171710000	183360000	212580000	175800000	207770000	231480000	139140000	55818000	90769000	112210000	58792000
P08572	CO4A2_HUMAN	Collagen alpha-2(IV) chain	COL4A2	0	0	0	0	0	0	0	0	91368000	42734000	73626000	36179000
P08574	CY1_HUMAN	Cytochrome c1, heme protein, mitochondrial	CYC1	67337000	83259000	71983000	79882000	64601000	85362000	84808000	90264000	8366900	26504000	25105000	19039000
P08579	RU2B_HUMAN	U2 small nuclear ribonucleoprotein B''	SNRPB2	44044000	86931000	0	147710000	60501000	67178000	90622000	96475000	0	0	0	0
P08581	MET_HUMAN	Hepatocyte growth factor receptor	MET	0	0	0	0	0	0	0	0	0	0	18922000	0
P08621	RU17_HUMAN	U1 small nuclear ribonucleoprotein 70 kDa	SNRNP70	528880000	455510000	578640000	594490000	527160000	465900000	521050000	533470000	230760000	87524000	162890000	181580000
P08648	ITA5_HUMAN	Integrin alpha-5	ITGA5	0	0	0	25275000	28503000	71328000	0	80557000	2096400000	1609300000	3536900000	1935900000
P08670	VIME_HUMAN	Vimentin	VIM	5188800000	4421200000	4707500000	5097000000	13230000000	12549000000	14070000000	14697000000	20244000000	22684000000	22542000000	22845000000
P08708	RS17_HUMAN	40S ribosomal protein S17	RPS17	1294600000	1059200000	944300000	1036200000	781390000	934370000	1025000000	1070500000	278660000	281610000	370130000	372280000
P08727	K1C19_HUMAN	Keratin, type I cytoskeletal 19	KRT19	596590000	491740000	547920000	653040000	1056900000	1132000000	1120200000	1054200000	0	0	116670000	0
P08754	GNAI3_HUMAN	Guanine nucleotide-binding protein G(i) subunit alpha-3	GNAI3	32399000	64980000	29420000	29468000	73661000	29834000	77881000	120790000	389510000	205670000	347410000	253130000
P08758	ANXA5_HUMAN	Annexin A5	ANXA5	1978800000	909700000	732260000	1055900000	1557700000	2390500000	1334500000	1935300000	4129500	86842000	21064000	0
P08865	RSSA_HUMAN	40S ribosomal protein SA	RPSA	1450800000	1598600000	1514400000	1828700000	2159800000	1504100000	2025600000	2190900000	22564000	51244000	33251000	55951000
P08962	CD63_HUMAN	CD63 antigen	CD63	45534000	0	54000000	88512000	86328000	88490000	79239000	72087000	264420000	238100000	301240000	283140000
P09001	RM03_HUMAN	39S ribosomal protein L3, mitochondrial	MRPL3	85048000	104230000	72808000	94488000	99422000	72398000	97089000	107290000	82179000	0	70372000	0
P09012	SNRPA_HUMAN	U1 small nuclear ribonucleoprotein A	SNRPA	124520000	125300000	135800000	179810000	113820000	112080000	170570000	120750000	0	0	0	0
P09038	FGF2_HUMAN	Fibroblast growth factor 2	FGF2	132670000	132080000	104870000	145150000	132640000	190410000	202860000	195370000	0	0	0	0
Q9UKI9	PO2F3_HUMAN	POU domain, class 2, transcription factor 3	POU2F3	0	0	23640000	23531000	17061000	13793000	17622000	16276000	0	0	0	0
P09104	ENOG_HUMAN	Gamma-enolase	ENO2	126490000	115640000	154350000	147320000	524920000	437390000	445940000	401150000	0	0	0	0
P09110	THIK_HUMAN	3-ketoacyl-CoA thiolase, peroxisomal	ACAA1	23812000	0	21753000	15748000	17110000	31379000	9325000	24868000	49929000	38552000	44530000	25558000
P09132	SRP19_HUMAN	Signal recognition particle 19 kDa protein	SRP19	17866000	0	14457000	12669000	22379000	0	17429000	17213000	0	0	0	0
P09211	GSTP1_HUMAN	Glutathione S-transferase P	GSTP1	2455500000	2713300000	2962000000	3108200000	4393000000	3303900000	4311400000	2453500000	228910000	302260000	221530000	164710000
P09234	RU1C_HUMAN	U1 small nuclear ribonucleoprotein C	SNRPC	55668000	0	0	51319000	37179000	51488000	80938000	71016000	0	0	0	0
P09327	VILI_HUMAN	Villin-1	VIL1	0	0	0	0	0	0	0	3179000	0	0	0	0
P09382	LEG1_HUMAN	Galectin-1	LGALS1	0	0	51846000	52846000	111580000	70332000	155710000	111110000	385760000	248340000	148450000	281500000
P09417	DHPR_HUMAN	Dihydropteridine reductase	QDPR	83075000	79645000	91037000	99927000	67143000	68302000	54609000	62736000	0	0	0	0
P09429	HMGB1_HUMAN	High mobility group protein B1	HMGB1	1779600000	2023400000	2207000000	2664200000	1535600000	1630500000	2334700000	2062400000	0	0	0	0
P09455	RET1_HUMAN	Retinol-binding protein 1	RBP1	19931000	20982000	0	22743000	67396000	62836000	75917000	68987000	0	0	0	0
P09471	GNAO_HUMAN	Guanine nucleotide-binding protein G(o) subunit alpha	GNAO1	42058000	0	81978000	46652000	28107000	36933000	0	47017000	0	0	0	0
P09486	SPRC_HUMAN	SPARC	SPARC	50384000	0	55337000	47701000	66956000	83290000	105760000	55747000	0	0	0	0
P09496	CLCA_HUMAN	Clathrin light chain A	CLTA	25839000	0	20316000	0	13870000	0	19269000	0	14690000	0	0	0
P09525	ANXA4_HUMAN	Annexin A4	ANXA4	20864000	17122000	31625000	22377000	59547000	37731000	40014000	45139000	0	0	0	0
P09543	CN37_HUMAN	2',3'-cyclic-nucleotide 3'-phosphodiesterase	CNP	32216000	22060000	72375000	71064000	56147000	46059000	44586000	46334000	448250000	148990000	364110000	300790000
P09601	HMOX1_HUMAN	Heme oxygenase 1	HMOX1	185110000	206160000	192130000	206630000	103710000	105920000	98935000	98659000	332170000	105560000	197800000	116300000
P09622	DLDH_HUMAN	Dihydrolipoyl dehydrogenase, mitochondrial	DLD	209340000	173040000	173680000	176460000	182310000	157940000	166770000	176800000	348170000	331560000	269070000	254690000
P09651	ROA1_HUMAN	Heterogeneous nuclear ribonucleoprotein A1	HNRNPA1	2508700000	2731400000	4523300000	3391800000	2692800000	2207800000	2384400000	2394500000	24367000	67070000	90716000	90399000
P09661	RU2A_HUMAN	U2 small nuclear ribonucleoprotein A'	SNRPA1	219740000	188070000	212950000	236490000	167430000	157820000	209470000	173030000	0	0	0	0
P09669	COX6C_HUMAN	Cytochrome c oxidase subunit 6C	COX6C	210880000	225200000	250920000	235270000	127880000	140220000	226090000	184750000	350260000	418760000	445970000	267950000
P09758	TACD2_HUMAN	Tumor-associated calcium signal transducer 2	TACSTD2	0	0	0	0	0	0	0	0	69456000	101310000	79501000	86446000
P09874	PARP1_HUMAN	Poly [ADP-ribose] polymerase 1	PARP1	2750800000	2744500000	3260400000	3310000000	2363700000	2069000000	2548100000	2630000000	803150000	412700000	696160000	641610000
P09884	DPOLA_HUMAN	DNA polymerase alpha catalytic subunit	POLA1	33548000	27345000	38529000	32903000	56836000	50968000	65075000	56205000	0	0	0	0
P09936	UCHL1_HUMAN	Ubiquitin carboxyl-terminal hydrolase isozyme L1	UCHL1	2318100000	2491400000	1800400000	3695000000	2217300000	2251500000	2868400000	2856200000	0	0	0	0
P09960	LKHA4_HUMAN	Leukotriene A-4 hydrolase	LTA4H	551150000	598120000	624140000	1025400000	504320000	500620000	680940000	772460000	499300000	326430000	558810000	208180000
P09972	ALDOC_HUMAN	Fructose-bisphosphate aldolase C	ALDOC	535130000	443650000	693390000	691590000	348620000	392240000	393430000	456760000	65918000	0	70102000	0
Q71UI9	H2AV_HUMAN	Histone H2A.V	H2AZ2	606360000	584880000	511670000	582850000	584340000	518820000	513760000	539490000	0	0	101600000	83380000
Q99878	H2A1J_HUMAN	Histone H2A type 1-J	H2AC14	1579000000	1599500000	1540000000	1465000000	1692000000	1253600000	1324900000	1329600000	532270000	0	0	0
P0CG13	CTF8_HUMAN	Chromosome transmission fidelity protein 8 homolog	CHTF8	26116000	0	15199000	25776000	12431000	21125000	35225000	38013000	0	0	0	0
P0DJ93	SIM13_HUMAN	Small integral membrane protein 13	SMIM13	0	0	0	0	0	0	0	0	0	0	53398000	0
P0DJD0	RGPD1_HUMAN	RANBP2-like and GRIP domain-containing protein 1	RGPD1	0	0	0	0	0	0	0	4592900	0	0	0	0
P0DMV9	HS71B_HUMAN	Heat shock 70 kDa protein 1B	HSPA1B	677860000	682080000	950670000	848510000	869460000	872920000	873990000	877390000	357840000	265230000	384860000	261200000
Q01081	U2AF1_HUMAN	Splicing factor U2AF 35 kDa subunit	U2AF1	212490000	178130000	241410000	158290000	208620000	271280000	186980000	205950000	159370000	115770000	105700000	128540000
P35520	CBS_HUMAN	Cystathionine beta-synthase	CBS	1535000000	1361400000	1477000000	1888800000	1304600000	1683600000	1815800000	1800200000	0	0	0	0
P0DP25	CALM3_HUMAN	Calmodulin-3	CALM3	39864000	46786000	81588000	43351000	46692000	59947000	57710000	26640000	60050000	0	52981000	39775000
P10155	RO60_HUMAN	60 kDa SS-A/Ro ribonucleoprotein	RO60	91690000	73512000	115130000	93963000	67551000	86009000	104460000	94718000	115420000	94766000	98126000	156560000
P10253	LYAG_HUMAN	Lysosomal alpha-glucosidase	GAA	6591100	0	4305400	10414000	0	7350700	7701900	0	0	0	0	0
P10301	RRAS_HUMAN	Ras-related protein R-Ras	RRAS	20079000	0	33816000	29671000	8934900	7402100	13547000	13592000	196360000	356400000	152050000	82974000
P10321	HLAC_HUMAN	HLA class I histocompatibility antigen, C alpha chain	HLA-C	0	0	0	0	0	0	0	0	0	0	8623000	0
P10412	H14_HUMAN	Histone H1.4	H1-4	34212000	0	0	34556000	0	0	0	155470000	70467000	0	99623000	0
P10451	OSTP_HUMAN	Osteopontin	SPP1	0	0	0	0	24989000	24357000	24283000	22639000	0	0	0	0
P10515	ODP2_HUMAN	Dihydrolipoyllysine-residue acetyltransferase component of pyruvate dehydrogenase complex, mitochondrial	DLAT	143290000	194180000	184560000	211170000	138570000	150540000	211610000	139800000	271270000	185420000	259220000	253660000
P10586	PTPRF_HUMAN	Receptor-type tyrosine-protein phosphatase F	PTPRF	61939000	57733000	53926000	68436000	64381000	44203000	48267000	56543000	98208000	21402000	59470000	64226000
P10599	THIO_HUMAN	Thioredoxin	TXN	725250000	540430000	279470000	628600000	630770000	584660000	559230000	606380000	0	0	0	0
P10606	COX5B_HUMAN	Cytochrome c oxidase subunit 5B, mitochondrial	COX5B	92287000	101620000	104540000	131980000	120880000	80939000	140630000	121760000	74564000	0	77846000	112230000
P10619	PPGB_HUMAN	Lysosomal protective protein	CTSA	0	19917000	15464000	16774000	0	0	0	15631000	0	0	0	0
P10620	MGST1_HUMAN	Microsomal glutathione S-transferase 1	MGST1	618140000	410910000	831500000	523690000	359140000	474710000	377020000	295000000	250200000	203610000	123070000	154380000
P10644	KAP0_HUMAN	cAMP-dependent protein kinase type I-alpha regulatory subunit	PRKAR1A	26545000	57170000	32605000	41613000	51203000	60134000	45374000	49012000	83768000	103160000	104010000	88864000
P10768	ESTD_HUMAN	S-formylglutathione hydrolase	ESD	174570000	111080000	131130000	138160000	99117000	92448000	166220000	119970000	0	0	176490000	0
P10809	CH60_HUMAN	60 kDa heat shock protein, mitochondrial	HSPD1	7720100000	8364700000	9236800000	7776000000	7372500000	6792700000	7918800000	6840600000	2001500000	2093900000	1792600000	1757100000
P10909	CLUS_HUMAN	Clusterin	CLU	61845000	75865000	72574000	60566000	88907000	92428000	91532000	94967000	0	0	0	0
P11021	BIP_HUMAN	Endoplasmic reticulum chaperone BiP	HSPA5	5379300000	4967400000	6150600000	5593000000	5701100000	5523400000	6123100000	6353500000	11849000000	12539000000	12875000000	10524000000
P11047	LAMC1_HUMAN	Laminin subunit gamma-1	LAMC1	63105000	0	66536000	54507000	49530000	134030000	129590000	128850000	91255000	87685000	98732000	79081000
P11117	PPAL_HUMAN	Lysosomal acid phosphatase	ACP2	0	0	0	0	17813000	0	0	0	27516000	31059000	25042000	32589000
P11137	MTAP2_HUMAN	Microtubule-associated protein 2	MAP2	29593000	18609000	30188000	25736000	0	15523000	14012000	15272000	0	0	0	0
P11142	HSP7C_HUMAN	Heat shock cognate 71 kDa protein	HSPA8	13770000000	14749000000	15556000000	15334000000	14864000000	14441000000	13135000000	13877000000	5006500000	6903600000	4887000000	5139200000
P11166	GTR1_HUMAN	Solute carrier family 2, facilitated glucose transporter member 1	SLC2A1	493260000	366810000	485060000	552470000	429510000	534720000	650940000	615120000	96075000	81091000	83811000	74271000
P11169	GTR3_HUMAN	Solute carrier family 2, facilitated glucose transporter member 3	SLC2A3	402430000	547450000	697720000	490880000	467830000	308090000	642810000	961050000	0	0	0	0
P11171	EPB41_HUMAN	Protein 4.1	EPB41	125130000	112190000	103140000	115360000	19875000	44301000	88290000	78659000	112450000	81884000	121260000	135020000
P11172	UMPS_HUMAN	Uridine 5'-monophosphate synthase	UMPS	321010000	168240000	223750000	313880000	147800000	208140000	179880000	181700000	28340000	0	32652000	36779000
P11177	ODPB_HUMAN	Pyruvate dehydrogenase E1 component subunit beta, mitochondrial	PDHB	351030000	320110000	311750000	363830000	429780000	379110000	424160000	458170000	460630000	490980000	473190000	384780000
P11182	ODB2_HUMAN	Lipoamide acyltransferase component of branched-chain alpha-keto acid dehydrogenase complex, mitochondrial	DBT	29175000	35718000	27196000	25592000	26981000	25113000	28984000	26993000	0	0	12679000	0
P11216	PYGB_HUMAN	Glycogen phosphorylase, brain form	PYGB	211780000	235320000	253380000	233510000	307440000	331570000	365540000	385770000	338030000	252430000	303930000	189220000
P11233	RALA_HUMAN	Ras-related protein Ral-A	RALA	243720000	188480000	253890000	256700000	175560000	223330000	253020000	260420000	3268400000	2621400000	3338000000	2584700000
P11234	RALB_HUMAN	Ras-related protein Ral-B	RALB	0	0	0	0	12598000	13610000	15191000	14431000	390900000	276220000	230070000	303550000
P11274	BCR_HUMAN	Breakpoint cluster region protein	BCR	13312000	0	13064000	15130000	12939000	12072000	11672000	14209000	0	0	0	0
P11279	LAMP1_HUMAN	Lysosome-associated membrane glycoprotein 1	LAMP1	295390000	331070000	285820000	458000000	332740000	379600000	308920000	304330000	1584900000	880480000	1546700000	823680000
P11310	ACADM_HUMAN	Medium-chain specific acyl-CoA dehydrogenase, mitochondrial	ACADM	82309000	66576000	95875000	81607000	93541000	116740000	112740000	114540000	143810000	103850000	139500000	127540000
P11387	TOP1_HUMAN	DNA topoisomerase 1	TOP1	540630000	390690000	432430000	465710000	497080000	533440000	464560000	516100000	128720000	45981000	84482000	64973000
P11388	TOP2A_HUMAN	DNA topoisomerase 2-alpha	TOP2A	1365000000	1357300000	1540000000	1384500000	729560000	783880000	759360000	627220000	95013000	9406800	126470000	47209000
P11413	G6PD_HUMAN	Glucose-6-phosphate 1-dehydrogenase	G6PD	219030000	266460000	254730000	326280000	382660000	425520000	449080000	441570000	113300000	80819000	116420000	66674000
P11441	UBL4A_HUMAN	Ubiquitin-like protein 4A	UBL4A	211640000	168980000	180270000	188290000	37264000	163370000	148440000	185460000	0	0	0	0
P11498	PYC_HUMAN	Pyruvate carboxylase, mitochondrial	PC	36262000	0	4633000	15259000	0	21833000	12356000	12929000	91909000	88398000	81260000	49963000
P11586	C1TC_HUMAN	C-1-tetrahydrofolate synthase, cytoplasmic	MTHFD1	1528800000	1466100000	1452000000	1440900000	1358300000	1398600000	1582900000	1452200000	367660000	265070000	478940000	373650000
P11717	MPRI_HUMAN	Cation-independent mannose-6-phosphate receptor	IGF2R	249030000	177360000	152210000	225830000	223120000	228520000	238200000	234770000	406600000	302070000	476090000	243010000
P11766	ADHX_HUMAN	Alcohol dehydrogenase class-3	ADH5	1120900000	1174600000	1030100000	1011200000	747070000	745320000	862550000	882190000	135520000	408130000	192200000	0
P11802	CDK4_HUMAN	Cyclin-dependent kinase 4	CDK4	0	0	0	0	0	0	0	0	0	63305000	0	0
P11940	PABP1_HUMAN	Polyadenylate-binding protein 1	PABPC1	2632600000	2402900000	2399700000	2346300000	2468800000	2332600000	2064400000	2178100000	3530500000	4305100000	4428000000	3712200000
P12004	PCNA_HUMAN	Proliferating cell nuclear antigen	PCNA	405640000	302090000	539490000	511900000	382150000	269110000	319610000	323380000	51971000	78938000	0	26970000
P12081	HARS1_HUMAN	Histidine--tRNA ligase, cytoplasmic	HARS1	109650000	179820000	136630000	140090000	183490000	165860000	333730000	138430000	0	0	0	0
P12109	CO6A1_HUMAN	Collagen alpha-1(VI) chain	COL6A1	6747600	4211900	2390500	8175500	7748700	0	10023000	13158000	0	0	0	0
P12110	CO6A2_HUMAN	Collagen alpha-2(VI) chain	COL6A2	0	0	0	0	0	0	0	7401000	0	0	0	0
P12111	CO6A3_HUMAN	Collagen alpha-3(VI) chain	COL6A3	41806000	0	0	0	59447000	0	0	0	0	69750000	0	0
P12235	ADT1_HUMAN	ADP/ATP translocase 1	SLC25A4	128990000	0	42121000	83879000	140290000	45846000	97203000	75714000	33903000	19560000	28700000	40224000
P12236	ADT3_HUMAN	ADP/ATP translocase 3	SLC25A6	581800000	559510000	518770000	844880000	717100000	666860000	820150000	661460000	2371400000	2006600000	1229800000	2531900000
P12268	IMDH2_HUMAN	Inosine-5'-monophosphate dehydrogenase 2	IMPDH2	1620400000	1340000000	1471400000	1454700000	1505900000	1484600000	1353800000	1280700000	89887000	19907000	142220000	70810000
P12270	TPR_HUMAN	Nucleoprotein TPR	TPR	535140000	554310000	649170000	790580000	527910000	529870000	615360000	591390000	0	0	0	0
P12277	KCRB_HUMAN	Creatine kinase B-type	CKB	743570000	661620000	783700000	663490000	1141600000	1488500000	1428300000	1262200000	0	0	0	0
P12429	ANXA3_HUMAN	Annexin A3	ANXA3	631350000	455410000	408380000	407440000	1254100000	1316300000	1036400000	1233300000	0	0	0	0
P12532	KCRU_HUMAN	Creatine kinase U-type, mitochondrial	CKMT1A	116900000	93539000	97319000	111830000	84119000	70706000	67830000	66624000	0	0	0	0
P12694	ODBA_HUMAN	2-oxoisovalerate dehydrogenase subunit alpha, mitochondrial	BCKDHA	0	0	0	0	0	0	0	0	0	0	17072000	0
P12814	ACTN1_HUMAN	Alpha-actinin-1	ACTN1	1697700000	1855800000	1759200000	1934100000	3036000000	2597300000	3571300000	3448400000	1648500000	2378600000	1839000000	1646300000
P12931	SRC_HUMAN	Proto-oncogene tyrosine-protein kinase Src	SRC	15701000	0	0	0	0	0	0	0	90558000	75730000	87170000	111670000
P12955	PEPD_HUMAN	Xaa-Pro dipeptidase	PEPD	90122000	90633000	83378000	86491000	83369000	79352000	61046000	79139000	0	0	0	0
P12956	XRCC6_HUMAN	X-ray repair cross-complementing protein 6	XRCC6	3091000000	3232100000	3423400000	3310400000	3018800000	3466800000	3581300000	3686300000	167620000	210270000	175130000	111510000
P13010	XRCC5_HUMAN	X-ray repair cross-complementing protein 5	XRCC5	2485900000	2322000000	2554100000	2455200000	2087000000	2009300000	2631300000	2398700000	79221000	41915000	62337000	26516000
P13051	UNG_HUMAN	Uracil-DNA glycosylase	UNG	33322000	0	21989000	23050000	0	0	16834000	0	0	0	0	0
P13073	COX41_HUMAN	Cytochrome c oxidase subunit 4 isoform 1, mitochondrial	COX4I1	495620000	625220000	587780000	650950000	571010000	487950000	595720000	523450000	688790000	393420000	530230000	567270000
P51864	TDGF3_HUMAN	Putative teratocarcinoma-derived growth factor 3	TDGF1P3	0	0	0	0	0	0	0	6256400	0	0	0	0
P13489	RINI_HUMAN	Ribonuclease inhibitor	RNH1	28912000	32692000	54098000	58620000	62855000	46393000	94861000	81850000	24772000	0	30296000	0
P13598	ICAM2_HUMAN	Intercellular adhesion molecule 2	ICAM2	0	0	0	0	0	0	0	0	853270000	354150000	565680000	665900000
P13611	CSPG2_HUMAN	Versican core protein	VCAN	267400000	161490000	337030000	227370000	161430000	154610000	160630000	151580000	0	0	0	0
P13612	ITA4_HUMAN	Integrin alpha-4	ITGA4	0	0	0	0	0	0	0	0	23646000	0	34371000	0
P13637	AT1A3_HUMAN	Sodium/potassium-transporting ATPase subunit alpha-3	ATP1A3	15069000	16548000	0	0	0	11672000	0	0	0	0	0	0
P13639	EF2_HUMAN	Elongation factor 2	EEF2	10912000000	9813300000	12446000000	10961000000	10308000000	10554000000	12027000000	10876000000	4902000000	4107800000	4346900000	4347500000
P13667	PDIA4_HUMAN	Protein disulfide-isomerase A4	PDIA4	2380700000	2433500000	2951200000	2410000000	2486000000	2384600000	2466500000	2262900000	3842200000	4390700000	4747900000	3462800000
P13674	P4HA1_HUMAN	Prolyl 4-hydroxylase subunit alpha-1	P4HA1	70599000	7036400	115130000	93696000	72749000	74067000	67954000	94239000	1145800000	1271900000	1250700000	1382100000
P13693	TCTP_HUMAN	Translationally-controlled tumor protein	TPT1	641290000	502900000	782440000	845610000	363690000	434600000	786300000	831660000	0	0	115940000	0
P13747	HLAE_HUMAN	HLA class I histocompatibility antigen, alpha chain E	HLA-E	0	0	0	0	0	0	0	0	38128000	38907000	0	0
P13796	PLSL_HUMAN	Plastin-2	LCP1	23715000	23843000	26665000	22566000	45728000	64991000	68039000	60174000	0	0	0	0
P13797	PLST_HUMAN	Plastin-3	PLS3	428190000	369780000	476060000	511320000	1645500000	1622800000	2086200000	1345800000	163690000	217840000	113170000	160270000
P13798	ACPH_HUMAN	Acylamino-acid-releasing enzyme	APEH	321660000	188940000	325840000	298910000	259380000	289320000	295320000	234560000	0	0	0	0
P13804	ETFA_HUMAN	Electron transfer flavoprotein subunit alpha, mitochondrial	ETFA	160040000	212720000	137310000	224220000	259600000	206740000	202760000	184610000	533150000	196580000	302720000	201380000
P13807	GYS1_HUMAN	Glycogen [starch] synthase, muscle	GYS1	74235000	51637000	52905000	38371000	55177000	68338000	65044000	67344000	1333800000	1410300000	1258000000	1061500000
P13861	KAP2_HUMAN	cAMP-dependent protein kinase type II-alpha regulatory subunit	PRKAR2A	65210000	63116000	54672000	55516000	76623000	74302000	57703000	62849000	50532000	0	105390000	37149000
P13984	T2FB_HUMAN	General transcription factor IIF subunit 2	GTF2F2	100490000	87622000	114630000	118260000	63755000	96359000	94038000	98630000	0	0	0	0
P13987	CD59_HUMAN	CD59 glycoprotein	CD59	0	0	0	0	0	0	0	0	3096700000	3881100000	4426200000	3179900000
P13995	MTDC_HUMAN	Bifunctional methylenetetrahydrofolate dehydrogenase/cyclohydrolase, mitochondrial	MTHFD2	77773000	48168000	51799000	39126000	43564000	45431000	53619000	66491000	21802000	0	0	0
P14174	MIF_HUMAN	Macrophage migration inhibitory factor	MIF	409840000	346430000	282680000	364100000	345750000	386300000	412690000	356330000	0	0	0	0
P14314	GLU2B_HUMAN	Glucosidase 2 subunit beta	PRKCSH	652820000	665610000	864740000	820510000	637770000	747670000	789210000	743850000	508790000	626140000	590840000	352560000
P14324	FPPS_HUMAN	Farnesyl pyrophosphate synthase	FDPS	412610000	332480000	573670000	486240000	514830000	458840000	447210000	488430000	0	0	0	0
P14373	TRI27_HUMAN	Zinc finger protein RFP	TRIM27	0	12810000	0	0	0	0	0	0	0	0	0	0
P14543	NID1_HUMAN	Nidogen-1	NID1	0	0	0	0	0	27424000	25429000	32688000	0	0	0	0
P14550	AK1A1_HUMAN	Aldo-keto reductase family 1 member A1	AKR1A1	519010000	271270000	399110000	390630000	313110000	361250000	389990000	403850000	91192000	46144000	137170000	0
P14618	KPYM_HUMAN	Pyruvate kinase PKM	PKM	6279900000	5365200000	4984300000	6183800000	9647200000	8155300000	9175100000	9331800000	3548800000	3510300000	2628800000	3610900000
P14625	ENPL_HUMAN	Endoplasmin	HSP90B1	5290200000	4991000000	6275900000	5520000000	5114100000	4867100000	4944600000	5510100000	10241000000	11194000000	11537000000	9845700000
P14635	CCNB1_HUMAN	G2/mitotic-specific cyclin-B1	CCNB1	50877000	0	46555000	56601000	75512000	55153000	53635000	60259000	0	0	0	0
P63162	RSMN_HUMAN	Small nuclear ribonucleoprotein-associated protein N	SNRPN	482020000	381880000	434660000	508820000	453500000	441660000	514920000	543210000	69130000	0	88111000	0
P14735	IDE_HUMAN	Insulin-degrading enzyme	IDE	308370000	218010000	278430000	492920000	335160000	557460000	521640000	307790000	63111000	0	84296000	0
P14866	HNRPL_HUMAN	Heterogeneous nuclear ribonucleoprotein L	HNRNPL	1267800000	1507200000	1742400000	1563100000	1079200000	1158700000	1436200000	1320800000	126660000	118580000	50334000	111480000
P14868	SYDC_HUMAN	Aspartate--tRNA ligase, cytoplasmic	DARS1	798170000	789590000	847170000	902530000	673120000	723200000	691330000	863280000	675820000	637710000	666210000	534870000
P14923	PLAK_HUMAN	Junction plakoglobin	JUP	507600000	444610000	306860000	411740000	412460000	469450000	499180000	446880000	306990000	247860000	500710000	136240000
P14927	QCR7_HUMAN	Cytochrome b-c1 complex subunit 7	UQCRB	117700000	84187000	83665000	92150000	76281000	78313000	71199000	84118000	0	0	0	0
P15104	GLNA_HUMAN	Glutamine synthetase	GLUL	0	0	0	0	0	16825000	17542000	16761000	0	0	0	0
P15121	ALDR_HUMAN	Aldo-keto reductase family 1 member B1	AKR1B1	628830000	547770000	592620000	571980000	366230000	553940000	741870000	649840000	0	0	0	0
P15144	AMPN_HUMAN	Aminopeptidase N	ANPEP	0	0	0	0	0	0	0	0	2748800000	4701600000	5849300000	4875500000
P15151	PVR_HUMAN	Poliovirus receptor	PVR	0	0	0	0	0	0	0	0	841860000	508850000	866780000	578730000
P15153	RAC2_HUMAN	Ras-related C3 botulinum toxin substrate 2	RAC2	0	0	0	0	0	0	0	0	257630000	649630000	542570000	697880000
P15170	ERF3A_HUMAN	Eukaryotic peptide chain release factor GTP-binding subunit ERF3A	GSPT1	644530000	640640000	691680000	464180000	523890000	470590000	754850000	798270000	76966000	0	158070000	95532000
P15289	ARSA_HUMAN	Arylsulfatase A	ARSA	0	0	0	0	0	0	0	0	22230000	33126000	25608000	24157000
P15291	B4GT1_HUMAN	Beta-1,4-galactosyltransferase 1	B4GALT1	0	0	0	0	0	0	0	0	76230000	38507000	42852000	44132000
P15311	EZRI_HUMAN	Ezrin	EZR	608660000	1552600000	988690000	761470000	1275800000	1517100000	1171700000	1435200000	96117000	92611000	122210000	66118000
P15374	UCHL3_HUMAN	Ubiquitin carboxyl-terminal hydrolase isozyme L3	UCHL3	38908000	35370000	20127000	17424000	19423000	18490000	15961000	12740000	0	0	0	0
P15529	MCP_HUMAN	Membrane cofactor protein	CD46	0	0	0	0	0	0	0	0	95391000	75679000	0	0
P15531	NDKA_HUMAN	Nucleoside diphosphate kinase A	NME1	263730000	189990000	432370000	370450000	186560000	199890000	227610000	184920000	0	0	0	0
P15559	NQO1_HUMAN	NAD(P)H dehydrogenase [quinone] 1	NQO1	221270000	187020000	162920000	282830000	32474000	15446000	0	0	66677000	67786000	63128000	171470000
P15586	GNS_HUMAN	N-acetylglucosamine-6-sulfatase	GNS	25048000	0	48481000	38110000	34881000	32382000	37151000	39772000	147820000	176500000	240520000	136510000
P15735	PHKG2_HUMAN	Phosphorylase b kinase gamma catalytic chain, liver/testis isoform	PHKG2	0	0	10151000	0	0	11427000	0	0	0	0	0	0
P15880	RS2_HUMAN	40S ribosomal protein S2	RPS2	3231000000	3183300000	3407100000	3636500000	2784500000	3249800000	3195400000	3129000000	2735200000	2146600000	2762600000	2748800000
P15907	SIAT1_HUMAN	Beta-galactoside alpha-2,6-sialyltransferase 1	ST6GAL1	0	0	0	0	0	0	0	0	36867000	0	35983000	0
P15924	DESP_HUMAN	Desmoplakin	DSP	299800000	239110000	238050000	270920000	583730000	642650000	695500000	594170000	0	0	0	0
P15927	RFA2_HUMAN	Replication protein A 32 kDa subunit	RPA2	61682000	47604000	46440000	37812000	44563000	34404000	44308000	68439000	0	0	0	0
P16070	CD44_HUMAN	CD44 antigen	CD44	0	0	0	0	39418000	48340000	32000000	0	3708400000	865480000	2781600000	709690000
P16083	NQO2_HUMAN	Ribosyldihydronicotinamide dehydrogenase [quinone]	NQO2	83713000	52969000	151090000	141660000	19585000	18010000	25078000	21780000	0	0	0	0
P16152	CBR1_HUMAN	Carbonyl reductase [NADPH] 1	CBR1	399170000	344710000	625230000	504710000	151400000	189560000	171200000	216420000	50174000	0	78822000	0
P16219	ACADS_HUMAN	Short-chain specific acyl-CoA dehydrogenase, mitochondrial	ACADS	0	0	0	0	0	0	0	0	251240000	0	33769000	0
P16220	CREB1_HUMAN	Cyclic AMP-responsive element-binding protein 1	CREB1	0	0	0	28814000	0	0	0	0	0	0	0	0
P16260	GDC_HUMAN	Graves disease carrier protein	SLC25A16	0	0	0	0	0	0	0	0	0	0	4651700	0
P16278	BGAL_HUMAN	Beta-galactosidase	GLB1	74179000	41477000	41992000	38721000	0	38612000	0	63883000	62833000	83629000	86812000	54096000
P16284	PECA1_HUMAN	Platelet endothelial cell adhesion molecule	PECAM1	9686000	0	0	0	0	0	0	0	3425000000	1843200000	4112800000	2387400000
P16298	PP2BB_HUMAN	Serine/threonine-protein phosphatase 2B catalytic subunit beta isoform	PPP3CB	0	0	0	0	0	0	0	6264100	0	0	0	0
P16333	NCK1_HUMAN	Cytoplasmic protein NCK1	NCK1	15169000	16935000	15745000	15545000	17030000	14768000	0	14448000	0	0	0	0
P16401	H15_HUMAN	Histone H1.5	H1-5	2145900000	2112800000	2385900000	2556100000	1624900000	2113600000	1881000000	1855900000	617070000	598680000	542360000	630080000
P16403	H12_HUMAN	Histone H1.2	H1-2	2882200000	3043300000	2932100000	2679600000	2322000000	2263500000	2068000000	3261600000	612880000	652900000	856920000	561070000
P16422	EPCAM_HUMAN	Epithelial cell adhesion molecule	EPCAM	79967000	0	191210000	223930000	128140000	58402000	103400000	97499000	0	0	0	0
P16435	NCPR_HUMAN	NADPH--cytochrome P450 reductase	POR	208460000	268550000	230840000	239380000	193150000	172180000	194410000	205600000	507440000	226580000	615170000	584960000
P16591	FER_HUMAN	Tyrosine-protein kinase Fer	FER	0	0	0	0	0	0	0	0	8750600	0	0	0
P16615	AT2A2_HUMAN	Sarcoplasmic/endoplasmic reticulum calcium ATPase 2	ATP2A2	720510000	737860000	877800000	937070000	623820000	716350000	808320000	829560000	4123700000	3109900000	3562100000	3556900000
P16930	FAAA_HUMAN	Fumarylacetoacetase	FAH	42476000	43901000	37596000	33114000	20490000	34265000	33989000	25025000	0	0	0	0
P16949	STMN1_HUMAN	Stathmin	STMN1	995790000	947450000	881560000	864810000	752000000	780670000	779710000	799310000	0	0	0	0
P16989	YBOX3_HUMAN	Y-box-binding protein 3	YBX3	86216000	84826000	178610000	162990000	130200000	102800000	160460000	129600000	164840000	0	114240000	0
P17026	ZNF22_HUMAN	Zinc finger protein 22	ZNF22	0	0	0	0	0	0	0	0	0	0	0	5309600
P17028	ZNF24_HUMAN	Zinc finger protein 24	ZNF24	0	0	0	0	0	0	0	14765000	0	0	0	0
P17096	HMGA1_HUMAN	High mobility group protein HMG-I/HMG-Y	HMGA1	786480000	664930000	779550000	1501200000	715390000	687130000	1117800000	713460000	72104000	0	0	0
P17152	TMM11_HUMAN	Transmembrane protein 11, mitochondrial	TMEM11	43903000	0	45130000	41556000	0	44066000	0	35219000	48700000	61704000	67266000	58286000
P17174	AATC_HUMAN	Aspartate aminotransferase, cytoplasmic	GOT1	387140000	344810000	607730000	523260000	552860000	536460000	779570000	620260000	0	0	0	0
P17252	KPCA_HUMAN	Protein kinase C alpha type	PRKCA	17323000	0	0	0	17911000	6086100	8792800	8233500	26735000	34313000	45387000	0
P17301	ITA2_HUMAN	Integrin alpha-2	ITGA2	6111200	0	0	0	26291000	21442000	91826000	17411000	2061000000	1565000000	1703500000	1276500000
P17302	CXA1_HUMAN	Gap junction alpha-1 protein	GJA1	254430000	245700000	295750000	327220000	168360000	190760000	245520000	237460000	499670000	296800000	428200000	383680000
P17405	ASM_HUMAN	Sphingomyelin phosphodiesterase	SMPD1	0	0	0	0	0	0	0	0	8261100	0	0	12142000
P17568	NDUB7_HUMAN	NADH dehydrogenase [ubiquinone] 1 beta subcomplex subunit 7	NDUFB7	0	0	8525000	19390000	12245000	11387000	10514000	11499000	0	0	0	0
P17600	SYN1_HUMAN	Synapsin-1	SYN1	4554800	5476000	4274500	0	0	0	0	1878600	0	0	0	0
P17612	KAPCA_HUMAN	cAMP-dependent protein kinase catalytic subunit alpha	PRKACA	26793000	0	0	22097000	30884000	0	0	29718000	0	0	0	0
P17655	CAN2_HUMAN	Calpain-2 catalytic subunit	CAPN2	31584000	0	0	16948000	170830000	143880000	172870000	217300000	235720000	240920000	199470000	232300000
P17677	NEUM_HUMAN	Neuromodulin	GAP43	31763000	21710000	24914000	10117000	25515000	10558000	5839700	5970800	0	0	0	0
P17812	PYRG1_HUMAN	CTP synthase 1	CTPS1	312280000	281070000	368810000	300410000	242090000	197250000	307200000	233460000	137050000	130970000	129850000	122370000
P17813	EGLN_HUMAN	Endoglin	ENG	35919000	0	0	0	0	0	0	0	819470000	1165500000	1238700000	615130000
P17844	DDX5_HUMAN	Probable ATP-dependent RNA helicase DDX5	DDX5	2739600000	2772800000	2498900000	2307300000	1983600000	2054100000	2200700000	2252800000	869020000	932840000	873990000	850130000
P17858	PFKAL_HUMAN	ATP-dependent 6-phosphofructokinase, liver type	PFKL	197040000	192670000	146540000	201340000	180730000	231520000	232360000	254500000	268620000	121590000	263870000	254250000
P17931	LEG3_HUMAN	Galectin-3	LGALS3	11785000	11756000	11993000	11386000	20948000	24689000	23147000	76587000	0	0	0	0
P17948	VGFR1_HUMAN	Vascular endothelial growth factor receptor 1	FLT1	22462000	22007000	20515000	19324000	24548000	25319000	28669000	25606000	0	0	25750000	0
P17980	PRS6A_HUMAN	26S proteasome regulatory subunit 6A	PSMC3	0	0	0	0	0	0	0	0	0	0	2533000	0
P17987	TCPA_HUMAN	T-complex protein 1 subunit alpha	TCP1	2555100000	2396200000	2839600000	2468700000	1999900000	2385000000	2313900000	2322100000	938060000	578020000	870850000	661400000
P18031	PTN1_HUMAN	Tyrosine-protein phosphatase non-receptor type 1	PTPN1	135490000	65639000	132800000	124340000	100850000	108570000	111340000	119480000	1357800000	819260000	1544600000	733050000
P18065	IBP2_HUMAN	Insulin-like growth factor-binding protein 2	IGFBP2	24238000	0	0	0	0	0	0	0	0	0	0	0
P18074	ERCC2_HUMAN	General transcription and DNA repair factor IIH helicase subunit XPD	ERCC2	0	0	0	0	5207100	0	3696400	3864900	0	0	0	0
P18077	RL35A_HUMAN	60S ribosomal protein L35a	RPL35A	607220000	727920000	667770000	709070000	893010000	716200000	697280000	858180000	774530000	620140000	1051600000	886520000
P18084	ITB5_HUMAN	Integrin beta-5	ITGB5	52004000	47844000	42920000	58238000	35507000	33854000	37468000	46390000	137610000	82743000	110640000	73660000
P18085	ARF4_HUMAN	ADP-ribosylation factor 4	ARF4	837040000	694490000	687500000	794430000	701560000	617300000	649200000	401680000	545960000	0	468710000	280390000
P18124	RL7_HUMAN	60S ribosomal protein L7	RPL7	4560400000	4849000000	4044700000	4111200000	3842700000	3735800000	3721700000	4224700000	4338100000	3504900000	5394000000	4430100000
P18206	VINC_HUMAN	Vinculin	VCL	8087200000	7500100000	9180700000	11176000000	8534000000	10180000000	11658000000	9146300000	154580000	200090000	217430000	88304000
P18433	PTPRA_HUMAN	Receptor-type tyrosine-protein phosphatase alpha	PTPRA	0	0	0	0	0	0	0	0	0	13154000	10551000	13128000
P18583	SON_HUMAN	Protein SON	SON	98969000	97447000	125040000	133750000	97880000	95165000	124300000	130980000	217140000	109020000	271570000	73060000
P18615	NELFE_HUMAN	Negative elongation factor E	NELFE	24274000	20492000	24738000	24307000	27450000	25105000	37458000	38514000	0	0	0	0
P18621	RL17_HUMAN	60S ribosomal protein L17	RPL17	1437400000	1148500000	1490900000	1541300000	1649800000	1612500000	1544800000	1349100000	1669400000	1174300000	1726200000	1745800000
P18669	PGAM1_HUMAN	Phosphoglycerate mutase 1	PGAM1	2879100000	2140300000	3002900000	3126700000	2967900000	2990900000	3471700000	3731700000	1302300000	1233200000	1226300000	998620000
P18754	RCC1_HUMAN	Regulator of chromosome condensation	RCC1	240800000	239120000	243850000	310860000	193050000	128500000	205980000	162110000	24373000	0	0	0
P18858	DNLI1_HUMAN	DNA ligase 1	LIG1	172460000	84709000	118750000	87427000	68147000	92507000	116500000	105360000	0	0	0	0
P18859	ATP5J_HUMAN	ATP synthase-coupling factor 6, mitochondrial	ATP5PF	19114000	0	25149000	14378000	18954000	17578000	21497000	15482000	0	0	15394000	0
P18887	XRCC1_HUMAN	DNA repair protein XRCC1	XRCC1	70434000	63091000	45622000	56399000	64961000	50906000	62162000	49780000	0	0	0	0
P19022	CADH2_HUMAN	Cadherin-2	CDH2	28247000	44829000	25468000	22304000	81334000	92272000	73216000	89657000	44821000	55605000	86760000	68260000
P19174	PLCG1_HUMAN	1-phosphatidylinositol 4,5-bisphosphate phosphodiesterase gamma-1	PLCG1	93015000	59944000	112400000	88439000	80410000	77046000	86717000	77608000	0	0	20601000	0
P19338	NUCL_HUMAN	Nucleolin	NCL	5741600000	5404400000	6266800000	6092500000	4850100000	5448900000	4966300000	6522400000	407340000	157930000	405730000	341040000
P19367	HXK1_HUMAN	Hexokinase-1	HK1	1092700000	1090100000	1217200000	1242300000	1112700000	916250000	1016200000	996710000	1191900000	908910000	1093900000	1062500000
P19387	RPB3_HUMAN	DNA-directed RNA polymerase II subunit RPB3	POLR2C	52285000	64850000	46280000	41407000	44820000	42924000	49560000	56906000	0	0	0	0
P19388	RPAB1_HUMAN	DNA-directed RNA polymerases I, II, and III subunit RPABC1	POLR2E	0	18443000	34453000	22503000	22577000	17621000	17336000	15615000	0	0	0	0
P19404	NDUV2_HUMAN	NADH dehydrogenase [ubiquinone] flavoprotein 2, mitochondrial	NDUFV2	0	0	16752000	18184000	36807000	16178000	18364000	18028000	0	0	0	0
P19447	ERCC3_HUMAN	General transcription and DNA repair factor IIH helicase subunit XPB	ERCC3	8427500	0	0	9466900	13643000	0	8560200	0	0	0	0	0
P19474	RO52_HUMAN	E3 ubiquitin-protein ligase TRIM21	TRIM21	0	0	0	0	0	0	0	0	0	0	29039000	0
P19525	E2AK2_HUMAN	Interferon-induced, double-stranded RNA-activated protein kinase	EIF2AK2	131130000	89426000	100040000	90028000	112390000	125150000	85913000	90413000	58320000	35812000	74695000	49207000
P19623	SPEE_HUMAN	Spermidine synthase	SRM	189790000	110940000	141920000	169980000	180370000	167400000	101650000	135560000	22095000	100840000	29402000	103210000
P19634	SL9A1_HUMAN	Sodium/hydrogen exchanger 1	SLC9A1	0	0	0	0	0	0	0	0	110690000	79877000	79448000	76581000
P19784	CSK22_HUMAN	Casein kinase II subunit alpha'	CSNK2A2	83354000	84664000	99854000	87986000	100160000	96664000	101110000	74929000	95640000	51963000	109540000	79312000
P20020	AT2B1_HUMAN	Plasma membrane calcium-transporting ATPase 1	ATP2B1	0	0	0	0	0	0	24636000	0	53965000	72548000	57831000	0
P20042	IF2B_HUMAN	Eukaryotic translation initiation factor 2 subunit 2	EIF2S2	139810000	140120000	219820000	212560000	160150000	211800000	214190000	155080000	124930000	96577000	176800000	166550000
P20073	ANXA7_HUMAN	Annexin A7	ANXA7	101880000	63186000	89264000	131470000	59313000	85925000	93074000	116610000	0	0	0	0
P20248	CCNA2_HUMAN	Cyclin-A2	CCNA2	11084000	12190000	12787000	19600000	12770000	9548200	14327000	10857000	0	0	0	0
P20290	BTF3_HUMAN	Transcription factor BTF3	BTF3	643650000	576020000	800340000	823190000	514160000	564040000	766710000	800600000	0	0	0	0
P20336	RAB3A_HUMAN	Ras-related protein Rab-3A	RAB3A	9380200	0	0	0	0	0	0	0	14661000	0	10544000	0
P20337	RAB3B_HUMAN	Ras-related protein Rab-3B	RAB3B	44303000	40493000	88181000	29884000	24716000	28875000	26801000	28197000	74995000	90347000	114950000	90915000
P20338	RAB4A_HUMAN	Ras-related protein Rab-4A	RAB4A	34664000	0	31121000	0	0	0	26158000	0	65086000	80215000	58874000	65439000
P20339	RAB5A_HUMAN	Ras-related protein Rab-5A	RAB5A	46162000	0	54472000	39464000	48142000	52940000	0	38392000	63029000	10463000	0	13367000
P20340	RAB6A_HUMAN	Ras-related protein Rab-6A	RAB6A	540550000	498380000	579310000	538090000	460330000	448100000	583610000	514850000	2165000000	1588200000	2764400000	2210500000
P20585	MSH3_HUMAN	DNA mismatch repair protein Msh3	MSH3	14594000	14013000	17488000	12284000	0	11432000	9259300	0	0	0	0	0
P20618	PSB1_HUMAN	Proteasome subunit beta type-1	PSMB1	475060000	377200000	694900000	755420000	546820000	575350000	895290000	605500000	0	0	12716000	0
P20645	MPRD_HUMAN	Cation-dependent mannose-6-phosphate receptor	M6PR	0	0	110640000	114620000	104010000	0	105300000	164140000	144530000	186730000	182900000	127610000
P20674	COX5A_HUMAN	Cytochrome c oxidase subunit 5A, mitochondrial	COX5A	80283000	0	0	0	0	0	0	47841000	66093000	0	107230000	0
P20700	LMNB1_HUMAN	Lamin-B1	LMNB1	1566800000	1416200000	1746700000	1934700000	1343000000	1362500000	1630100000	1820800000	720850000	473630000	692520000	446760000
P20810	ICAL_HUMAN	Calpastatin	CAST	0	0	43062000	30197000	40138000	54955000	42354000	65349000	0	0	0	0
P20839	IMDH1_HUMAN	Inosine-5'-monophosphate dehydrogenase 1	IMPDH1	0	30183000	27047000	19450000	28503000	25308000	22555000	32809000	0	0	0	0
P20908	CO5A1_HUMAN	Collagen alpha-1(V) chain	COL5A1	0	0	0	0	0	0	0	0	64661000	0	75381000	0
P20936	RASA1_HUMAN	Ras GTPase-activating protein 1	RASA1	0	0	0	0	0	0	0	7292000	0	0	0	0
Q9UQ88	CD11A_HUMAN	Cyclin-dependent kinase 11A	CDK11A	57952000	68689000	63578000	75449000	68582000	72616000	70588000	70852000	37808000	0	41867000	0
P21266	GSTM3_HUMAN	Glutathione S-transferase Mu 3	GSTM3	0	0	0	0	0	0	24679000	0	0	0	0	0
P21281	VATB2_HUMAN	V-type proton ATPase subunit B, brain isoform	ATP6V1B2	89168000	94591000	128100000	140050000	42268000	88540000	104370000	105550000	387380000	374250000	371320000	110460000
P21283	VATC1_HUMAN	V-type proton ATPase subunit C 1	ATP6V1C1	83446000	70387000	70185000	65836000	60285000	60362000	57278000	55231000	0	0	0	0
P21291	CSRP1_HUMAN	Cysteine and glycine-rich protein 1	CSRP1	69619000	0	78958000	70954000	0	0	0	0	1787900000	1458700000	1245600000	1469800000
P21333	FLNA_HUMAN	Filamin-A	FLNA	7902500000	7340000000	9028000000	9373900000	13359000000	12897000000	16408000000	17014000000	6437100000	5334400000	5842400000	5337700000
P21397	AOFA_HUMAN	Amine oxidase [flavin-containing] A	MAOA	0	0	0	0	0	0	0	0	193950000	187870000	216950000	208070000
P21399	ACOC_HUMAN	Cytoplasmic aconitate hydratase	ACO1	124510000	112980000	126790000	110950000	72651000	76871000	79223000	70847000	19202000	0	0	0
P21453	S1PR1_HUMAN	Sphingosine 1-phosphate receptor 1	S1PR1	0	0	0	0	0	0	0	0	0	41603000	61189000	51091000
P21589	5NTD_HUMAN	5'-nucleotidase	NT5E	0	0	0	0	14014000	0	0	0	544950000	790870000	705640000	782170000
P21709	EPHA1_HUMAN	Ephrin type-A receptor 1	EPHA1	66549000	51169000	61629000	54002000	51019000	58758000	49501000	51861000	0	0	0	0
P21741	MK_HUMAN	Midkine	MDK	0	0	0	0	16776000	0	0	0	0	0	0	0
P21796	VDAC1_HUMAN	Voltage-dependent anion-selective channel protein 1	VDAC1	1639500000	1457200000	1764600000	1575400000	1448000000	1427800000	1665200000	1129500000	4476000000	2071500000	4441700000	4845200000
P21912	SDHB_HUMAN	Succinate dehydrogenase [ubiquinone] iron-sulfur subunit, mitochondrial	SDHB	134590000	0	0	67634000	100650000	80599000	88753000	71107000	88133000	34188000	0	100430000
P21926	CD9_HUMAN	CD9 antigen	CD9	148400000	175680000	102710000	117190000	118050000	121990000	107230000	93824000	2149400000	5878800000	2123100000	3306000000
P21953	ODBB_HUMAN	2-oxoisovalerate dehydrogenase subunit beta, mitochondrial	BCKDHB	0	0	0	0	0	0	16881000	14186000	0	0	0	0
P21964	COMT_HUMAN	Catechol O-methyltransferase	COMT	0	0	0	19282000	37453000	69304000	51852000	30791000	1205600000	267740000	563160000	497290000
P21980	TGM2_HUMAN	Protein-glutamine gamma-glutamyltransferase 2	TGM2	0	0	0	0	0	0	0	0	481440000	308550000	511030000	226560000
P22033	MUTA_HUMAN	Methylmalonyl-CoA mutase, mitochondrial	MMUT	63891000	49172000	37731000	40949000	40212000	48624000	33658000	0	20792000	14282000	19134000	17229000
P22059	OSBP1_HUMAN	Oxysterol-binding protein 1	OSBP	49938000	43103000	62130000	61709000	44296000	45357000	51335000	49223000	37390000	0	0	0
P22061	PIMT_HUMAN	Protein-L-isoaspartate(D-aspartate) O-methyltransferase	PCMT1	174820000	115760000	172450000	158600000	150040000	159230000	168800000	149620000	0	0	0	0
P22087	FBRL_HUMAN	rRNA 2'-O-methyltransferase fibrillarin	FBL	637590000	727780000	837020000	710200000	487130000	533780000	634530000	520230000	555230000	443710000	576940000	618870000
P22102	PUR2_HUMAN	Trifunctional purine biosynthetic protein adenosine-3	GART	1021700000	1032500000	1207700000	1083800000	627380000	692030000	833350000	984960000	232550000	115380000	285150000	137350000
P22223	CADH3_HUMAN	Cadherin-3	CDH3	38562000	0	0	36608000	31967000	32451000	30832000	22360000	0	0	0	0
P22234	PUR6_HUMAN	Multifunctional protein ADE2	PAICS	2020100000	1849700000	2309100000	2122100000	1569500000	1772400000	2085500000	1620100000	52448000	0	66969000	0
P22307	SCP2_HUMAN	Sterol carrier protein 2	SCP2	181410000	143660000	190320000	245440000	132800000	157220000	214090000	148480000	270280000	243800000	300690000	210900000
P22314	UBA1_HUMAN	Ubiquitin-like modifier-activating enzyme 1	UBA1	1300700000	1208400000	1775200000	2036900000	1602000000	2018600000	2960400000	3361800000	163190000	65570000	150360000	127820000
P22413	ENPP1_HUMAN	Ectonucleotide pyrophosphatase/phosphodiesterase family member 1	ENPP1	28576000	0	22523000	19566000	30208000	35827000	24192000	26439000	0	0	0	0
P22570	ADRO_HUMAN	NADPH:adrenodoxin oxidoreductase, mitochondrial	FDXR	40216000	0	46008000	37607000	48396000	79670000	50934000	89343000	368920000	318220000	461400000	211730000
P22626	ROA2_HUMAN	Heterogeneous nuclear ribonucleoproteins A2/B1	HNRNPA2B1	4210800000	3614600000	4055900000	4388300000	2867300000	3027700000	3705800000	3030600000	61524000	80023000	46804000	48168000
P22681	CBL_HUMAN	E3 ubiquitin-protein ligase CBL	CBL	45173000	0	30164000	33647000	49276000	46263000	31783000	39537000	0	0	0	0
P22692	IBP4_HUMAN	Insulin-like growth factor-binding protein 4	IGFBP4	0	0	0	0	0	0	0	0	7406300	0	0	0
P22695	QCR2_HUMAN	Cytochrome b-c1 complex subunit 2, mitochondrial	UQCRC2	316940000	350990000	343570000	306740000	427180000	446520000	353530000	359140000	256240000	284340000	386680000	164350000
P22830	HEMH_HUMAN	Ferrochelatase, mitochondrial	FECH	0	0	0	0	0	0	0	0	26082000	19205000	20892000	17877000
P23193	TCEA1_HUMAN	Transcription elongation factor A protein 1	TCEA1	291890000	271990000	308460000	389720000	466000000	539050000	627900000	558710000	0	0	0	0
P23219	PGH1_HUMAN	Prostaglandin G/H synthase 1	PTGS1	0	0	0	0	0	0	0	0	181530000	278970000	179190000	226360000
P23229	ITA6_HUMAN	Integrin alpha-6	ITGA6	81553000	78318000	77805000	79499000	80383000	71561000	53994000	54322000	256860000	146960000	326160000	173890000
P23246	SFPQ_HUMAN	Splicing factor, proline- and glutamine-rich	SFPQ	2892200000	2198200000	2910200000	3443100000	2568600000	2184300000	3811700000	3765800000	82185000	74737000	119950000	21292000
P23258	TBG1_HUMAN	Tubulin gamma-1 chain	TUBG1	40856000	35627000	50513000	39275000	30795000	39615000	36331000	40337000	29130000	51774000	49537000	39816000
P23284	PPIB_HUMAN	Peptidyl-prolyl cis-trans isomerase B	PPIB	2090000000	1678400000	1703500000	1888800000	1729400000	1680300000	1608300000	1480000000	4590200000	4850000000	4869400000	5901500000
P23352	KALM_HUMAN	Anosmin-1	ANOS1	38831000	0	36599000	34491000	60369000	61133000	70244000	67013000	0	0	0	0
P23368	MAOM_HUMAN	NAD-dependent malic enzyme, mitochondrial	ME2	133870000	99530000	147070000	127730000	105070000	89306000	95090000	111340000	312090000	150890000	253970000	235000000
P23378	GCSP_HUMAN	Glycine dehydrogenase (decarboxylating), mitochondrial	GLDC	209230000	186580000	272530000	265070000	190120000	193160000	188840000	197760000	0	0	0	0
P23381	SYWC_HUMAN	Tryptophan--tRNA ligase, cytoplasmic	WARS1	673950000	416450000	853130000	799530000	510430000	776040000	982460000	697520000	0	0	0	0
P23396	RS3_HUMAN	40S ribosomal protein S3	RPS3	3729500000	4058000000	4298200000	3622200000	3375900000	3859500000	3522600000	3933100000	1940400000	1868200000	1891400000	1797600000
P23434	GCSH_HUMAN	Glycine cleavage system H protein, mitochondrial	GCSH	35792000	28407000	10480000	21389000	11389000	13876000	15323000	16068000	0	0	0	0
P23458	JAK1_HUMAN	Tyrosine-protein kinase JAK1	JAK1	0	0	0	0	0	0	0	0	1335900000	434320000	1421100000	1087400000
P23467	PTPRB_HUMAN	Receptor-type tyrosine-protein phosphatase beta	PTPRB	0	0	0	0	0	0	0	0	275740000	260150000	325870000	291340000
P23470	PTPRG_HUMAN	Receptor-type tyrosine-protein phosphatase gamma	PTPRG	5774500	0	5553500	0	0	0	0	0	0	0	0	0
P23471	PTPRZ_HUMAN	Receptor-type tyrosine-protein phosphatase zeta	PTPRZ1	43964000	35814000	39796000	55448000	20132000	0	22214000	28239000	0	0	0	0
P23510	TNFL4_HUMAN	Tumor necrosis factor ligand superfamily member 4	TNFSF4	0	0	0	0	0	0	0	0	436600000	250330000	325760000	338590000
P23526	SAHH_HUMAN	Adenosylhomocysteinase	AHCY	2114800000	3439900000	4015500000	3888300000	1603600000	2366100000	3172000000	1999500000	63038000	54559000	38225000	74570000
P23527	H2B1O_HUMAN	Histone H2B type 1-O	H2BC17	180100000	160980000	243150000	156330000	100160000	108350000	105350000	102020000	53498000	0	57645000	0
P23528	COF1_HUMAN	Cofilin-1	CFL1	3477400000	3629500000	3714600000	4314900000	4054400000	3430000000	4404200000	4629200000	1102500000	1285200000	1169000000	1333800000
P23588	IF4B_HUMAN	Eukaryotic translation initiation factor 4B	EIF4B	345100000	343460000	336410000	358830000	288990000	293080000	316110000	376300000	0	0	0	0
P23610	HAP40_HUMAN	40-kDa huntingtin-associated protein	F8A1	0	0	0	8121700	10575000	9683500	8232500	7899500	0	0	0	0
P23634	AT2B4_HUMAN	Plasma membrane calcium-transporting ATPase 4	ATP2B4	44449000	20778000	23747000	20451000	11105000	34759000	28494000	33805000	1665300000	740170000	2316300000	950130000
P23743	DGKA_HUMAN	Diacylglycerol kinase alpha	DGKA	0	0	0	0	35251000	40742000	37471000	39632000	57267000	0	53638000	0
P23786	CPT2_HUMAN	Carnitine O-palmitoyltransferase 2, mitochondrial	CPT2	53141000	41685000	68598000	64996000	76899000	69974000	65407000	81073000	128160000	0	161380000	81224000
P23919	KTHY_HUMAN	Thymidylate kinase	DTYMK	100780000	107260000	95392000	108670000	111190000	118480000	124960000	103710000	0	0	0	0
P23921	RIR1_HUMAN	Ribonucleoside-diphosphate reductase large subunit	RRM1	512420000	342550000	274570000	431970000	313260000	250040000	190170000	351370000	69720000	193240000	51573000	151280000
P24385	CCND1_HUMAN	G1/S-specific cyclin-D1	CCND1	0	0	0	0	0	0	0	0	0	0	0	7036400
P24386	RAE1_HUMAN	Rab proteins geranylgeranyltransferase component A 1	CHM	0	0	14480000	12527000	0	15469000	27052000	23644000	0	0	0	0
P24534	EF1B_HUMAN	Elongation factor 1-beta	EEF1B2	849440000	1005100000	651300000	773490000	888740000	1026300000	1074200000	977040000	0	0	0	0
P24539	AT5F1_HUMAN	ATP synthase F(0) complex subunit B1, mitochondrial	ATP5PB	917120000	673440000	648780000	771580000	711570000	762080000	639090000	553730000	1992600000	1965500000	3104900000	1469500000
P24666	PPAC_HUMAN	Low molecular weight phosphotyrosine protein phosphatase	ACP1	132050000	172950000	171550000	184750000	116090000	143710000	159310000	172130000	0	0	0	0
P24723	KPCL_HUMAN	Protein kinase C eta type	PRKCH	0	0	0	0	0	0	0	0	75455000	82609000	75864000	85363000
P24752	THIL_HUMAN	Acetyl-CoA acetyltransferase, mitochondrial	ACAT1	147850000	150560000	170720000	149920000	184720000	194960000	232430000	220890000	1023400000	574080000	918780000	727090000
P24821	TENA_HUMAN	Tenascin	TNC	0	0	0	0	0	2218100	0	0	0	0	0	0
P24844	MYL9_HUMAN	Myosin regulatory light polypeptide 9	MYL9	80164000	0	57387000	44895000	89730000	80987000	93802000	100970000	0	0	0	0
P24928	RPB1_HUMAN	DNA-directed RNA polymerase II subunit RPB1	POLR2A	107220000	93753000	115100000	168250000	135670000	89372000	119000000	115270000	242050000	234930000	214390000	233880000
P24941	CDK2_HUMAN	Cyclin-dependent kinase 2	CDK2	0	13013000	19178000	20349000	21726000	22193000	15514000	17711000	0	0	0	0
P25098	ARBK1_HUMAN	Beta-adrenergic receptor kinase 1	GRK2	0	0	0	0	0	0	0	0	15899000	0	16621000	0
P25116	PAR1_HUMAN	Proteinase-activated receptor 1	F2R	0	0	0	0	0	0	0	0	403860000	120110000	368230000	0
P25205	MCM3_HUMAN	DNA replication licensing factor MCM3	MCM3	1534900000	1663900000	1639900000	1845100000	964010000	976430000	1063700000	1228400000	156780000	101500000	175410000	104410000
P25325	THTM_HUMAN	3-mercaptopyruvate sulfurtransferase	MPST	68426000	75391000	81447000	74168000	66416000	95476000	68960000	55809000	0	0	0	0
P25391	LAMA1_HUMAN	Laminin subunit alpha-1	LAMA1	23507000	21224000	19963000	0	0	0	0	15071000	0	0	0	0
P25398	RS12_HUMAN	40S ribosomal protein S12	RPS12	1820000000	1279500000	1046600000	1230600000	1297200000	1610200000	1662800000	1505500000	19467000	0	0	48444000
P25440	BRD2_HUMAN	Bromodomain-containing protein 2	BRD2	9751600	9569600	5360200	11620000	9431300	0	0	0	0	0	0	0
P25445	TNR6_HUMAN	Tumor necrosis factor receptor superfamily member 6	FAS	0	0	0	0	0	0	0	0	93442000	59774000	90506000	78061000
P25490	TYY1_HUMAN	Transcriptional repressor protein YY1	YY1	0	0	42557000	0	0	0	0	0	0	0	0	0
P25685	DNJB1_HUMAN	DnaJ homolog subfamily B member 1	DNAJB1	41891000	73500000	97810000	90292000	50453000	113410000	75874000	96698000	0	0	0	0
P25686	DNJB2_HUMAN	DnaJ homolog subfamily B member 2	DNAJB2	0	0	0	0	0	0	0	0	0	0	0	19572000
P25705	ATPA_HUMAN	ATP synthase subunit alpha, mitochondrial	ATP5F1A	4142100000	3763500000	4190000000	4129500000	3281800000	3625300000	3923800000	4036200000	6793800000	7007600000	7627800000	7593600000
P25786	PSA1_HUMAN	Proteasome subunit alpha type-1	PSMA1	938950000	770530000	1024900000	930340000	715180000	765670000	801570000	1096200000	447010000	441960000	478870000	386730000
P25787	PSA2_HUMAN	Proteasome subunit alpha type-2	PSMA2	465210000	207470000	667930000	351140000	271420000	370620000	589080000	537960000	156480000	94741000	84200000	176280000
P25788	PSA3_HUMAN	Proteasome subunit alpha type-3	PSMA3	728550000	580250000	692250000	765330000	577130000	522390000	627130000	599610000	435680000	296270000	393510000	305110000
P25789	PSA4_HUMAN	Proteasome subunit alpha type-4	PSMA4	536980000	528490000	507280000	650020000	547100000	480580000	665970000	477840000	41659000	37341000	38450000	59699000
P26006	ITA3_HUMAN	Integrin alpha-3	ITGA3	12885000	0	0	77070000	80795000	84891000	30392000	83333000	165560000	0	279950000	73263000
P26022	PTX3_HUMAN	Pentraxin-related protein PTX3	PTX3	0	0	0	0	0	0	0	0	67725000	98471000	96364000	77029000
P26038	MOES_HUMAN	Moesin	MSN	1803100000	1580500000	1854000000	1495300000	1524600000	1622600000	1677700000	1586100000	2551200000	2924500000	2699600000	2638400000
P26196	DDX6_HUMAN	Probable ATP-dependent RNA helicase DDX6	DDX6	721490000	493290000	584240000	783480000	421780000	370780000	648820000	577710000	84926000	70099000	127660000	52761000
P26232	CTNA2_HUMAN	Catenin alpha-2	CTNNA2	0	0	0	0	40017000	0	0	17303000	62004000	0	0	0
P26358	DNMT1_HUMAN	DNA (cytosine-5)-methyltransferase 1	DNMT1	182940000	185440000	210750000	190390000	134710000	150160000	163070000	153660000	154530000	120340000	189730000	95169000
P26368	U2AF2_HUMAN	Splicing factor U2AF 65 kDa subunit	U2AF2	87795000	97749000	151550000	130620000	116180000	115080000	98432000	72623000	0	0	0	0
P26373	RL13_HUMAN	60S ribosomal protein L13	RPL13	3089400000	3595000000	3204300000	2854600000	2650300000	2554900000	2857400000	2956600000	2143400000	2328100000	2989100000	2649100000
P26374	RAE2_HUMAN	Rab proteins geranylgeranyltransferase component A 2	CHML	0	17957000	0	0	0	0	0	0	0	0	0	0
P26440	IVD_HUMAN	Isovaleryl-CoA dehydrogenase, mitochondrial	IVD	121130000	121110000	144420000	105730000	112930000	99781000	108640000	90066000	172040000	185280000	168110000	117860000
P26572	MGAT1_HUMAN	Alpha-1,3-mannosyl-glycoprotein 2-beta-N-acetylglucosaminyltransferase	MGAT1	0	0	0	0	0	0	0	0	121090000	120210000	112250000	118050000
P26583	HMGB2_HUMAN	High mobility group protein B2	HMGB2	985590000	809170000	1047800000	900060000	543000000	790130000	1160500000	805470000	0	0	0	0
P26599	PTBP1_HUMAN	Polypyrimidine tract-binding protein 1	PTBP1	779400000	654870000	1070900000	1021700000	947030000	809070000	937400000	1014100000	27421000	43358000	58244000	52788000
P26639	SYTC_HUMAN	Threonine--tRNA ligase 1, cytoplasmic	TARS1	1256800000	926190000	1507400000	1263300000	901900000	548910000	771920000	919460000	1199700000	801810000	991510000	963000000
P26640	SYVC_HUMAN	Valine--tRNA ligase	VARS1	546890000	483760000	674000000	687840000	553340000	479940000	614130000	654890000	828750000	445150000	782650000	649560000
P26641	EF1G_HUMAN	Elongation factor 1-gamma	EEF1G	1638000000	1247700000	1594300000	1856100000	1472200000	1373400000	1760000000	1752900000	473600000	501920000	503920000	500090000
P26885	FKBP2_HUMAN	Peptidyl-prolyl cis-trans isomerase FKBP2	FKBP2	47676000	0	0	61833000	0	0	0	46075000	128670000	183060000	166340000	154650000
P27105	STOM_HUMAN	Stomatin	STOM	53739000	52950000	61987000	83005000	0	0	0	0	5162600000	3003100000	4660300000	3572400000
P27144	KAD4_HUMAN	Adenylate kinase 4, mitochondrial	AK4	774800000	622870000	639220000	599650000	445490000	368840000	420210000	359300000	0	0	0	0
P27348	1433T_HUMAN	14-3-3 protein theta	YWHAQ	718250000	622310000	655520000	881120000	699310000	677540000	1275400000	865040000	0	0	0	0
P27361	MK03_HUMAN	Mitogen-activated protein kinase 3	MAPK3	0	0	52357000	0	0	0	35770000	0	127390000	84113000	83975000	155820000
P27448	MARK3_HUMAN	MAP/microtubule affinity-regulating kinase 3	MARK3	37468000	32734000	22339000	27495000	29706000	16427000	28319000	26940000	0	0	12049000	0
P27449	VATL_HUMAN	V-type proton ATPase 16 kDa proteolipid subunit	ATP6V0C	0	0	0	0	0	0	0	0	0	0	0	89548000
P27635	RL10_HUMAN	60S ribosomal protein L10	RPL10	0	0	72304000	0	152080000	140510000	129030000	119990000	32251000	0	0	0
P27694	RFA1_HUMAN	Replication protein A 70 kDa DNA-binding subunit	RPA1	192890000	182530000	234310000	289730000	203740000	157880000	206200000	193710000	0	0	0	0
P27695	APEX1_HUMAN	DNA-(apurinic or apyrimidinic site) endonuclease	APEX1	743240000	654040000	473370000	926100000	669250000	610850000	911280000	837530000	0	0	0	0
P27708	PYR1_HUMAN	CAD protein	CAD	1237200000	1212600000	1305600000	1349000000	1270500000	1242400000	1392200000	1288000000	1209400000	1116300000	1308600000	1113600000
P27797	CALR_HUMAN	Calreticulin	CALR	2452600000	2516200000	2873100000	2921500000	2194100000	2606300000	2282200000	2440100000	4198200000	5458500000	2292500000	4196200000
P27824	CALX_HUMAN	Calnexin	CANX	983710000	629890000	934060000	785060000	825620000	768620000	680780000	682720000	4037600000	2657800000	2770800000	3120700000
P28066	PSA5_HUMAN	Proteasome subunit alpha type-5	PSMA5	279900000	260060000	343630000	434310000	215700000	150940000	361250000	308600000	55543000	0	70828000	0
P28070	PSB4_HUMAN	Proteasome subunit beta type-4	PSMB4	242240000	252370000	302670000	270750000	155160000	154540000	244610000	182980000	178040000	236860000	242950000	228400000
P28072	PSB6_HUMAN	Proteasome subunit beta type-6	PSMB6	405080000	402390000	372500000	352020000	245740000	205900000	238690000	213450000	377570000	237440000	362410000	0
P28074	PSB5_HUMAN	Proteasome subunit beta type-5	PSMB5	490590000	525610000	660360000	670960000	446980000	450710000	634480000	576730000	205910000	139180000	242230000	220650000
P28161	GSTM2_HUMAN	Glutathione S-transferase Mu 2	GSTM2	0	0	0	0	11900000	17913000	0	15742000	0	0	0	0
P28288	ABCD3_HUMAN	ATP-binding cassette sub-family D member 3	ABCD3	52123000	59091000	72302000	53980000	58007000	59528000	58970000	40936000	190960000	103920000	146790000	165790000
P28300	LYOX_HUMAN	Protein-lysine 6-oxidase	LOX	0	0	0	0	0	0	0	0	174340000	161720000	151150000	147850000
P28331	NDUS1_HUMAN	NADH-ubiquinone oxidoreductase 75 kDa subunit, mitochondrial	NDUFS1	349520000	335970000	415980000	357190000	269940000	259450000	308700000	269260000	433820000	367430000	514240000	436410000
P28340	DPOD1_HUMAN	DNA polymerase delta catalytic subunit	POLD1	56463000	50896000	52260000	40557000	52652000	49128000	44483000	48957000	0	0	0	0
P28370	SMCA1_HUMAN	Probable global transcription activator SNF2L1	SMARCA1	79908000	104910000	93224000	92810000	100840000	106020000	110870000	124780000	0	0	0	0
P28482	MK01_HUMAN	Mitogen-activated protein kinase 1	MAPK1	115510000	48997000	108680000	90100000	116420000	109800000	85656000	90840000	648750000	423160000	709050000	600920000
P28676	GRAN_HUMAN	Grancalcin	GCA	22171000	35366000	40530000	0	23758000	21056000	17526000	21132000	0	0	0	0
P28799	GRN_HUMAN	Progranulin	GRN	0	0	0	0	0	0	0	0	0	0	7321500	0
P28827	PTPRM_HUMAN	Receptor-type tyrosine-protein phosphatase mu	PTPRM	0	0	0	0	0	0	0	0	0	0	14239000	0
P28838	AMPL_HUMAN	Cytosol aminopeptidase	LAP3	257200000	191820000	387270000	343630000	230620000	217740000	287170000	306590000	176330000	130440000	190350000	151120000
P28908	TNR8_HUMAN	Tumor necrosis factor receptor superfamily member 8	TNFRSF8	30139000	0	30885000	33750000	0	0	0	17274000	0	0	0	0
P29083	T2EA_HUMAN	General transcription factor IIE subunit 1	GTF2E1	0	0	13018000	14548000	20342000	19274000	0	13183000	0	0	0	0
P29144	TPP2_HUMAN	Tripeptidyl-peptidase 2	TPP2	484870000	360340000	498180000	533490000	416640000	299850000	330040000	319170000	0	0	0	0
P29218	IMPA1_HUMAN	Inositol monophosphatase 1	IMPA1	114860000	88330000	128860000	157430000	107490000	139450000	133320000	151520000	0	0	0	0
P29279	CCN2_HUMAN	CCN family member 2	CCN2	47127000	49983000	59539000	0	82416000	131380000	142570000	113150000	145590000	95063000	151090000	120710000
P29317	EPHA2_HUMAN	Ephrin type-A receptor 2	EPHA2	23192000	0	0	0	18433000	0	26112000	0	1574700000	1151300000	2120200000	1865900000
P29323	EPHB2_HUMAN	Ephrin type-B receptor 2	EPHB2	0	0	0	0	0	0	0	0	120820000	101980000	123510000	127580000
P29353	SHC1_HUMAN	SHC-transforming protein 1	SHC1	0	10428000	13896000	11768000	10972000	0	11276000	0	0	0	0	0
P29372	3MG_HUMAN	DNA-3-methyladenine glycosylase	MPG	0	0	23537000	30421000	26025000	25575000	26552000	25095000	0	0	0	0
P29373	RABP2_HUMAN	Cellular retinoic acid-binding protein 2	CRABP2	165920000	147760000	131850000	164910000	304620000	334350000	351560000	275600000	0	0	0	0
P29401	TKT_HUMAN	Transketolase	TKT	6146800000	7090100000	8415400000	7471900000	6826500000	7021900000	8530800000	8125100000	1906100000	2272500000	2275000000	1484900000
P29474	NOS3_HUMAN	Nitric oxide synthase, endothelial	NOS3	0	0	0	0	0	0	0	0	685650000	369820000	612180000	388910000
P29590	PML_HUMAN	Protein PML	PML	23387000	6645000	20387000	41091000	15007000	20634000	25686000	18456000	22413000	19558000	85646000	41135000
P29597	TYK2_HUMAN	Non-receptor tyrosine-protein kinase TYK2	TYK2	0	0	0	0	0	0	0	0	4121700	0	0	0
P29692	EF1D_HUMAN	Elongation factor 1-delta	EEF1D	1157600000	963140000	1409900000	1577700000	1375000000	1153300000	1243800000	1420200000	87521000	60523000	86349000	0
P29762	RABP1_HUMAN	Cellular retinoic acid-binding protein 1	CRABP1	5959900000	4737200000	4572500000	5695500000	3762200000	3472600000	3561600000	2838400000	0	0	0	0
P29966	MARCS_HUMAN	Myristoylated alanine-rich C-kinase substrate	MARCKS	348920000	571270000	384410000	333090000	201220000	564370000	555560000	489860000	1548700000	154800000	1909400000	190900000
P29992	GNA11_HUMAN	Guanine nucleotide-binding protein subunit alpha-11	GNA11	28111000	64831000	72029000	68302000	41163000	60597000	0	46648000	472490000	402500000	629140000	408060000
P30038	AL4A1_HUMAN	Delta-1-pyrroline-5-carboxylate dehydrogenase, mitochondrial	ALDH4A1	63543000	80745000	112230000	112940000	96766000	117200000	117990000	111000000	52879000	0	72803000	0
P30040	ERP29_HUMAN	Endoplasmic reticulum resident protein 29	ERP29	403020000	380340000	354600000	392320000	286780000	343700000	389120000	396800000	116830000	143780000	127260000	68659000
P30041	PRDX6_HUMAN	Peroxiredoxin-6	PRDX6	3263500000	1951700000	2118800000	2676100000	1410500000	1289000000	2093200000	2167700000	49667000	0	52790000	16137000
P30043	BLVRB_HUMAN	Flavin reductase (NADPH)	BLVRB	113720000	108400000	122210000	92649000	75939000	99012000	84435000	124260000	0	0	0	0
P30044	PRDX5_HUMAN	Peroxiredoxin-5, mitochondrial	PRDX5	185670000	140860000	143070000	142500000	160320000	149420000	175860000	118190000	75892000	0	57142000	78655000
P30046	DOPD_HUMAN	D-dopachrome decarboxylase	DDT	157590000	161460000	149790000	142000000	132480000	120800000	110300000	105880000	0	0	0	0
P30048	PRDX3_HUMAN	Thioredoxin-dependent peroxide reductase, mitochondrial	PRDX3	460130000	417240000	162070000	296930000	480610000	494380000	334340000	370830000	100290000	0	115280000	104970000
P30049	ATPD_HUMAN	ATP synthase subunit delta, mitochondrial	ATP5F1D	88402000	0	64421000	85621000	0	0	67885000	64623000	0	0	0	0
P30050	RL12_HUMAN	60S ribosomal protein L12	RPL12	1191700000	1424300000	953020000	1266600000	1137400000	1174300000	1368100000	1546800000	850630000	964400000	861220000	715490000
P30084	ECHM_HUMAN	Enoyl-CoA hydratase, mitochondrial	ECHS1	203220000	152200000	260600000	203580000	206430000	194820000	225710000	178330000	228310000	76200000	300070000	117890000
P30085	KCY_HUMAN	UMP-CMP kinase	CMPK1	53445000	44836000	50841000	59085000	41135000	45813000	43172000	33905000	0	0	0	0
P30086	PEBP1_HUMAN	Phosphatidylethanolamine-binding protein 1	PEBP1	753610000	900920000	782170000	1209700000	402330000	573900000	879200000	1017200000	0	0	0	0
P30101	PDIA3_HUMAN	Protein disulfide-isomerase A3	PDIA3	4515700000	4627900000	4605400000	4785600000	5044400000	4194800000	4712600000	4898700000	19144000000	17607000000	20965000000	16403000000
P30153	2AAA_HUMAN	Serine/threonine-protein phosphatase 2A 65 kDa regulatory subunit A alpha isoform	PPP2R1A	1259900000	1077000000	1209600000	1455600000	907190000	865280000	1536800000	1002100000	154850000	165300000	189680000	54380000
P30154	2AAB_HUMAN	Serine/threonine-protein phosphatase 2A 65 kDa regulatory subunit A beta isoform	PPP2R1B	66721000	67615000	54915000	76376000	43493000	39638000	54934000	57737000	0	0	0	0
P30291	WEE1_HUMAN	Wee1-like protein kinase	WEE1	17617000	24438000	15164000	17724000	25686000	33813000	21907000	29355000	0	0	0	0
P30307	MPIP3_HUMAN	M-phase inducer phosphatase 3	CDC25C	0	0	0	0	0	0	0	1885700	0	0	0	0
P30419	NMT1_HUMAN	Glycylpeptide N-tetradecanoyltransferase 1	NMT1	119180000	102920000	103720000	90402000	106200000	107910000	89919000	89275000	0	53236000	0	0
P30519	HMOX2_HUMAN	Heme oxygenase 2	HMOX2	111780000	110000000	67812000	83124000	140080000	145400000	103660000	110920000	258030000	194830000	312310000	226130000
P30520	PURA2_HUMAN	Adenylosuccinate synthetase isozyme 2	ADSS2	235000000	190270000	414870000	592680000	323090000	290400000	353080000	396150000	0	0	0	0
P30530	UFO_HUMAN	Tyrosine-protein kinase receptor UFO	AXL	4969100	0	0	0	14157000	8448300	19079000	10300000	75157000	0	65173000	0
P30533	AMRP_HUMAN	Alpha-2-macroglobulin receptor-associated protein	LRPAP1	78602000	81789000	112620000	97505000	59991000	66822000	83745000	60947000	93778000	90253000	129540000	87138000
P30536	TSPO_HUMAN	Translocator protein	TSPO	0	0	0	0	0	0	0	0	0	0	70909000	0
P30566	PUR8_HUMAN	Adenylosuccinate lyase	ADSL	362700000	330110000	405000000	489300000	402060000	384010000	431350000	436480000	0	0	0	0
P30622	CLIP1_HUMAN	CAP-Gly domain-containing linker protein 1	CLIP1	0	0	0	0	12211000	18611000	0	15552000	0	0	0	0
P30626	SORCN_HUMAN	Sorcin	SRI	28513000	27029000	33056000	29403000	23710000	26772000	32292000	37537000	0	0	0	0
P30740	ILEU_HUMAN	Leukocyte elastase inhibitor	SERPINB1	0	0	14767000	0	12188000	0	16764000	27034000	0	0	0	0
P30825	SL7A1_HUMAN	High affinity cationic amino acid transporter 1	SLC7A1	46524000	42929000	38500000	37251000	40397000	40867000	33030000	38394000	0	0	0	0
P30837	AL1B1_HUMAN	Aldehyde dehydrogenase X, mitochondrial	ALDH1B1	108330000	114880000	140660000	148490000	175630000	134070000	173910000	172650000	63139000	49436000	98717000	116520000
P30876	RPB2_HUMAN	DNA-directed RNA polymerase II subunit RPB2	POLR2B	136250000	92329000	168560000	198440000	182380000	161250000	215390000	252090000	403790000	290030000	312190000	297650000
P31040	SDHA_HUMAN	Succinate dehydrogenase [ubiquinone] flavoprotein subunit, mitochondrial	SDHA	85523000	0	97580000	170350000	122590000	0	126840000	155950000	497250000	344790000	423980000	225700000
P31146	COR1A_HUMAN	Coronin-1A	CORO1A	52181000	0	43889000	47086000	0	31760000	20236000	15324000	31070000	26959000	34689000	23148000
P31150	GDIA_HUMAN	Rab GDP dissociation inhibitor alpha	GDI1	79911000	72075000	85087000	72687000	113060000	108220000	105990000	121390000	0	0	0	0
P31153	METK2_HUMAN	S-adenosylmethionine synthase isoform type-2	MAT2A	543380000	401250000	549570000	948270000	613170000	367280000	790820000	683610000	155090000	76641000	178890000	111680000
P31323	KAP3_HUMAN	cAMP-dependent protein kinase type II-beta regulatory subunit	PRKAR2B	0	0	9647100	0	0	0	6910300	5002800	0	0	0	0
P31350	RIR2_HUMAN	Ribonucleoside-diphosphate reductase subunit M2	RRM2	233950000	213700000	227320000	365430000	172570000	172750000	292010000	190200000	0	0	0	0
P31431	SDC4_HUMAN	Syndecan-4	SDC4	0	0	0	0	15493000	0	0	0	0	0	0	0
P31483	TIA1_HUMAN	Nucleolysin TIA-1 isoform p40	TIA1	12944000	12087000	21385000	13359000	12120000	0	12017000	0	0	0	0	0
P31641	SC6A6_HUMAN	Sodium- and chloride-dependent taurine transporter	SLC6A6	10700000	0	22977000	11444000	0	6760500	10536000	0	0	0	0	0
P31689	DNJA1_HUMAN	DnaJ homolog subfamily A member 1	DNAJA1	179770000	154650000	137480000	141400000	152420000	141700000	203570000	193280000	208400000	163190000	213680000	150900000
P31749	AKT1_HUMAN	RAC-alpha serine/threonine-protein kinase	AKT1	12710000	0	0	14517000	0	0	17023000	0	39670000	26307000	37731000	37892000
P31751	AKT2_HUMAN	RAC-beta serine/threonine-protein kinase	AKT2	0	0	0	0	0	0	7129800	0	0	0	0	0
P31930	QCR1_HUMAN	Cytochrome b-c1 complex subunit 1, mitochondrial	UQCRC1	346870000	281980000	313010000	311880000	299130000	259070000	235450000	286310000	389220000	507070000	454370000	522230000
P31937	3HIDH_HUMAN	3-hydroxyisobutyrate dehydrogenase, mitochondrial	HIBADH	28345000	0	0	25650000	37963000	26063000	41665000	30398000	0	0	31595000	0
P31939	PUR9_HUMAN	Bifunctional purine biosynthesis protein ATIC	ATIC	1497700000	1770000000	2308200000	2356900000	1228700000	1400100000	1850800000	1947600000	227850000	105200000	120850000	79767000
P31942	HNRH3_HUMAN	Heterogeneous nuclear ribonucleoprotein H3	HNRNPH3	632770000	606740000	1008300000	819060000	738070000	616540000	702170000	851860000	0	0	0	0
P31943	HNRH1_HUMAN	Heterogeneous nuclear ribonucleoprotein H	HNRNPH1	2417600000	2397200000	3075200000	3192500000	2763900000	2753100000	3132600000	3244600000	407030000	317800000	361090000	357540000
P31944	CASPE_HUMAN	Caspase-14	CASP14	3210200	0	0	0	0	0	0	0	0	0	0	0
P31946	1433B_HUMAN	14-3-3 protein beta/alpha	YWHAB	644230000	725880000	872110000	736430000	758990000	674600000	812260000	703390000	101610000	165320000	96427000	0
P31947	1433S_HUMAN	14-3-3 protein sigma	SFN	48694000	40645000	19076000	33098000	51362000	93051000	186920000	98640000	0	0	0	0
P31948	STIP1_HUMAN	Stress-induced-phosphoprotein 1	STIP1	2623600000	1857100000	2772300000	1954700000	1840700000	2613700000	2529500000	2338000000	0	0	0	0
P31949	S10AB_HUMAN	Protein S100-A11	S100A11	224680000	182760000	0	98923000	422160000	428340000	576320000	510020000	0	0	0	0
P32119	PRDX2_HUMAN	Peroxiredoxin-2	PRDX2	1188200000	824020000	766130000	870500000	1055200000	1127400000	982860000	1332400000	0	0	0	0
P32121	ARRB2_HUMAN	Beta-arrestin-2	ARRB2	21578000	0	0	22926000	30037000	27294000	34419000	22941000	0	0	0	0
P32189	GLPK_HUMAN	Glycerol kinase	GK	0	0	0	0	0	0	0	0	30041000	0	0	0
P32321	DCTD_HUMAN	Deoxycytidylate deaminase	DCTD	70590000	55619000	51315000	53996000	47970000	47402000	42733000	41842000	0	0	0	0
P32322	P5CR1_HUMAN	Pyrroline-5-carboxylate reductase 1, mitochondrial	PYCR1	495980000	400210000	539860000	449540000	470990000	412780000	418790000	430980000	547400000	315460000	408290000	579730000
P32856	STX2_HUMAN	Syntaxin-2	STX2	0	0	0	0	0	0	0	0	0	0	22623000	0
P32929	CGL_HUMAN	Cystathionine gamma-lyase	CTH	57070000	63737000	75078000	64594000	47252000	51581000	62543000	55792000	0	0	0	0
P32969	RL9_HUMAN	60S ribosomal protein L9	RPL9	1192800000	886760000	1077100000	1077500000	941920000	812120000	984930000	750360000	156730000	39972000	97882000	145400000
P33121	ACSL1_HUMAN	Long-chain-fatty-acid--CoA ligase 1	ACSL1	16284000	0	0	149170000	68870000	50499000	41930000	50061000	136760000	144530000	152920000	59430000
P33151	CADH5_HUMAN	Cadherin-5	CDH5	0	0	0	0	0	0	0	0	150650000	192670000	242360000	224210000
P33176	KINH_HUMAN	Kinesin-1 heavy chain	KIF5B	252530000	212730000	273910000	270980000	313330000	320560000	397900000	375780000	805940000	473920000	661580000	584620000
P33240	CSTF2_HUMAN	Cleavage stimulation factor subunit 2	CSTF2	0	15671000	0	0	0	0	0	0	0	0	0	0
P33316	DUT_HUMAN	Deoxyuridine 5'-triphosphate nucleotidohydrolase, mitochondrial	DUT	345330000	218320000	351940000	342760000	135050000	149120000	158860000	156430000	0	0	0	0
P33527	MRP1_HUMAN	Multidrug resistance-associated protein 1	ABCC1	19564000	0	0	26015000	30241000	0	49595000	30893000	275240000	161620000	156160000	146920000
P33897	ABCD1_HUMAN	ATP-binding cassette sub-family D member 1	ABCD1	0	0	0	0	0	0	0	0	56618000	53464000	56203000	0
P33981	TTK_HUMAN	Dual specificity protein kinase TTK	TTK	27912000	23186000	21824000	21842000	18324000	18288000	22119000	23715000	0	0	0	0
P33991	MCM4_HUMAN	DNA replication licensing factor MCM4	MCM4	1023800000	959480000	1228300000	1666900000	545330000	618790000	856360000	758250000	221810000	139440000	184160000	143780000
P33992	MCM5_HUMAN	DNA replication licensing factor MCM5	MCM5	1326800000	1320200000	1255200000	1396500000	1016300000	733500000	895740000	852650000	173090000	110700000	189550000	160440000
P33993	MCM7_HUMAN	DNA replication licensing factor MCM7	MCM7	1023700000	952000000	1237000000	1130400000	651630000	789410000	853460000	917200000	447620000	477170000	448250000	464070000
P34741	SDC2_HUMAN	Syndecan-2	SDC2	0	0	0	0	0	0	0	27221000	0	0	0	0
P34896	GLYC_HUMAN	Serine hydroxymethyltransferase, cytosolic	SHMT1	20017000	14320000	21533000	19784000	18014000	17998000	29743000	26663000	0	0	0	0
P34897	GLYM_HUMAN	Serine hydroxymethyltransferase, mitochondrial	SHMT2	1288100000	1237900000	1234300000	1229200000	1485800000	1493500000	1473500000	1529900000	815490000	781100000	618560000	777190000
P34932	HSP74_HUMAN	Heat shock 70 kDa protein 4	HSPA4	2244700000	2530100000	4096400000	4313000000	1669000000	2118900000	2868500000	2284100000	269470000	227350000	256920000	135390000
P34949	MPI_HUMAN	Mannose-6-phosphate isomerase	MPI	0	0	0	15737000	0	0	11090000	0	0	0	0	0
P35221	CTNA1_HUMAN	Catenin alpha-1	CTNNA1	697430000	448040000	874210000	867320000	962380000	747550000	1022400000	1020700000	2664300000	3130700000	3173400000	1672000000
P35222	CTNB1_HUMAN	Catenin beta-1	CTNNB1	304680000	334110000	320210000	454160000	348410000	382560000	375950000	439480000	840630000	1522200000	1361300000	937530000
P35232	PHB_HUMAN	Prohibitin	PHB	1087700000	971450000	1088400000	1103600000	1058900000	1141300000	983580000	1226900000	606380000	663930000	825160000	360700000
P35237	SPB6_HUMAN	Serpin B6	SERPINB6	125840000	117850000	113890000	109710000	167170000	193080000	234630000	215730000	26831000	0	50861000	42728000
P35240	MERL_HUMAN	Merlin	NF2	0	0	0	0	0	0	0	0	22980000	0	23292000	0
P35241	RADI_HUMAN	Radixin	RDX	64558000	44110000	98610000	111190000	66609000	64326000	92694000	84538000	34323000	87120000	116170000	31475000
P35244	RFA3_HUMAN	Replication protein A 14 kDa subunit	RPA3	38124000	37632000	26169000	35537000	27993000	23976000	28088000	25356000	0	0	0	0
P35249	RFC4_HUMAN	Replication factor C subunit 4	RFC4	154830000	114850000	115730000	84963000	70965000	79219000	106870000	89139000	0	0	0	0
P35250	RFC2_HUMAN	Replication factor C subunit 2	RFC2	75176000	74005000	113940000	106370000	54760000	62235000	78257000	74504000	0	0	0	0
P35251	RFC1_HUMAN	Replication factor C subunit 1	RFC1	37622000	0	35356000	41686000	30794000	0	34461000	26084000	21934000	0	15299000	20426000
P35268	RL22_HUMAN	60S ribosomal protein L22	RPL22	1250700000	1362200000	1990700000	1854000000	1657300000	1504700000	1776500000	1224900000	334470000	245950000	330480000	294280000
P35269	T2FA_HUMAN	General transcription factor IIF subunit 1	GTF2F1	77860000	75994000	61702000	86006000	81972000	59252000	69650000	66292000	0	0	0	0
P35318	ADML_HUMAN	Pro-adrenomedullin	ADM	0	0	0	0	0	0	0	14100000	0	0	0	0
P35354	PGH2_HUMAN	Prostaglandin G/H synthase 2	PTGS2	0	0	0	0	0	0	0	0	0	0	11047000	16404000
P35527	K1C9_HUMAN	Keratin, type I cytoskeletal 9	KRT9	1855500000	1279600000	1187100000	473300000	1492300000	2811300000	1228000000	1091000000	1014300000	1432400000	2622500000	881870000
P35555	FBN1_HUMAN	Fibrillin-1	FBN1	0	0	0	0	0	0	0	0	0	0	14530000	6301900
P35573	GDE_HUMAN	Glycogen debranching enzyme	AGL	37027000	26971000	38511000	44241000	49236000	50090000	49348000	40967000	0	0	0	0
P35579	MYH9_HUMAN	Myosin-9	MYH9	5089600000	4618700000	5000700000	5339300000	9148300000	9213900000	9457700000	9693100000	36934000000	30607000000	34676000000	35439000000
P35580	MYH10_HUMAN	Myosin-10	MYH10	3558400000	3540800000	4230400000	3947300000	3161800000	3014300000	3526100000	3356500000	2089800000	1243900000	1770400000	1506600000
P35590	TIE1_HUMAN	Tyrosine-protein kinase receptor Tie-1	TIE1	0	0	0	0	0	0	0	0	149350000	122330000	174160000	113330000
P35606	COPB2_HUMAN	Coatomer subunit beta'	COPB2	651860000	595830000	684640000	684350000	525800000	445200000	608600000	567940000	3233500000	2907400000	3841500000	3228500000
P35610	SOAT1_HUMAN	Sterol O-acyltransferase 1	SOAT1	0	0	0	0	0	0	0	0	44418000	28480000	13243000	23857000
P35611	ADDA_HUMAN	Alpha-adducin	ADD1	209920000	156350000	263570000	246450000	195120000	222980000	209850000	209290000	54003000	0	53185000	15259000
P35612	ADDB_HUMAN	Beta-adducin	ADD2	87897000	95923000	85553000	130240000	103360000	97959000	81838000	84592000	0	0	0	0
P35613	BASI_HUMAN	Basigin	BSG	828900000	852180000	980870000	1046100000	843220000	737990000	646150000	743360000	2591000000	2119500000	2725800000	2311200000
P35637	FUS_HUMAN	RNA-binding protein FUS	FUS	1468800000	1080000000	1399800000	1515200000	1040500000	939710000	1284900000	1465500000	49068000	0	68139000	0
P35658	NU214_HUMAN	Nuclear pore complex protein Nup214	NUP214	79395000	60319000	131300000	112410000	68621000	72460000	67825000	66304000	0	0	0	0
P35659	DEK_HUMAN	Protein DEK	DEK	351490000	262570000	442180000	366460000	243130000	318340000	254260000	174330000	0	0	37422000	34538000
P35789	ZNF93_HUMAN	Zinc finger protein 93	ZNF93	8142100	0	8306900	0	0	0	9680200	0	0	0	0	0
P35790	CHKA_HUMAN	Choline kinase alpha	CHKA	0	0	0	0	0	0	0	1029500	0	0	0	0
P35914	HMGCL_HUMAN	Hydroxymethylglutaryl-CoA lyase, mitochondrial	HMGCL	25453000	0	26020000	32802000	0	18217000	27313000	0	40321000	0	51518000	32558000
P35968	VGFR2_HUMAN	Vascular endothelial growth factor receptor 2	KDR	0	0	0	0	0	0	0	0	14360000	12684000	10612000	0
P35998	PRS7_HUMAN	26S proteasome regulatory subunit 7	PSMC2	635440000	712600000	600750000	737130000	773320000	684150000	738020000	722660000	873110000	888390000	964610000	638050000
P36021	MOT8_HUMAN	Monocarboxylate transporter 8	SLC16A2	15816000	0	0	0	0	0	0	0	0	0	0	0
P36269	GGT5_HUMAN	Glutathione hydrolase 5 proenzyme	GGT5	47078000	0	0	0	0	0	0	0	0	0	0	0
P36404	ARL2_HUMAN	ADP-ribosylation factor-like protein 2	ARL2	56646000	54720000	74373000	55684000	81975000	81530000	63707000	51826000	0	0	0	0
P36405	ARL3_HUMAN	ADP-ribosylation factor-like protein 3	ARL3	62242000	58776000	59684000	66879000	70755000	78788000	70944000	79123000	0	0	0	0
P36507	MP2K2_HUMAN	Dual specificity mitogen-activated protein kinase kinase 2	MAP2K2	73957000	58161000	68845000	69412000	67291000	50024000	43811000	81491000	39803000	0	62012000	0
P36542	ATPG_HUMAN	ATP synthase subunit gamma, mitochondrial	ATP5F1C	667080000	493960000	528760000	505710000	760040000	605050000	537760000	561930000	1120000000	720400000	895610000	929730000
P36543	VATE1_HUMAN	V-type proton ATPase subunit E 1	ATP6V1E1	46213000	57468000	69326000	87371000	72780000	72069000	75784000	78023000	0	0	14186000	0
P36551	HEM6_HUMAN	Oxygen-dependent coproporphyrinogen-III oxidase, mitochondrial	CPOX	43434000	42631000	50291000	54120000	45394000	53576000	44134000	54618000	13948000	25441000	0	0
P36578	RL4_HUMAN	60S ribosomal protein L4	RPL4	3330200000	2972000000	3054300000	3501200000	3185500000	3295300000	3569500000	3358400000	10361000000	8687900000	11957000000	8952200000
P36639	8ODP_HUMAN	7,8-dihydro-8-oxoguanine triphosphatase	NUDT1	0	50548000	0	0	38296000	40047000	0	0	0	0	0	0
P36776	LONM_HUMAN	Lon protease homolog, mitochondrial	LONP1	239700000	269150000	299760000	291940000	256660000	243890000	333110000	286740000	310090000	295240000	340160000	277440000
P36871	PGM1_HUMAN	Phosphoglucomutase-1	PGM1	134480000	116230000	133750000	161410000	144270000	139400000	174810000	165850000	0	0	0	0
P36873	PP1G_HUMAN	Serine/threonine-protein phosphatase PP1-gamma catalytic subunit	PPP1CC	75218000	69681000	67751000	83177000	68350000	66700000	70163000	83730000	38868000	0	38757000	0
P36915	GNL1_HUMAN	Guanine nucleotide-binding protein-like 1	GNL1	25518000	26564000	25844000	24048000	28223000	31725000	26768000	32970000	31611000	0	0	0
P36957	ODO2_HUMAN	Dihydrolipoyllysine-residue succinyltransferase component of 2-oxoglutarate dehydrogenase complex, mitochondrial	DLST	90027000	161910000	201380000	166420000	188860000	188970000	199570000	148750000	234840000	246240000	254880000	197380000
P36969	GPX4_HUMAN	Phospholipid hydroperoxide glutathione peroxidase	GPX4	70171000	68319000	72014000	75197000	72614000	52094000	71623000	66611000	0	0	0	0
P37023	ACVL1_HUMAN	Serine/threonine-protein kinase receptor R3	ACVRL1	0	0	0	0	0	0	0	0	90715000	62727000	59619000	81562000
P37059	DHB2_HUMAN	17-beta-hydroxysteroid dehydrogenase type 2	HSD17B2	0	0	0	0	0	0	0	0	28765000	0	28214000	0
P37108	SRP14_HUMAN	Signal recognition particle 14 kDa protein	SRP14	660470000	444910000	382520000	544960000	403430000	506420000	435800000	497690000	0	15345000	0	0
P37173	TGFR2_HUMAN	TGF-beta receptor type-2	TGFBR2	0	0	0	0	0	0	0	0	77766000	85417000	72492000	60332000
P37198	NUP62_HUMAN	Nuclear pore glycoprotein p62	NUP62	0	0	0	9487700	0	0	0	0	0	0	0	0
P37268	FDFT_HUMAN	Squalene synthase	FDFT1	899570000	546980000	942550000	679300000	627010000	943150000	837660000	666980000	95768000	0	80116000	49910000
P37802	TAGL2_HUMAN	Transgelin-2	TAGLN2	788080000	637760000	511200000	561320000	2598600000	2624000000	2948100000	2795500000	24276000	7777700	48416000	0
P37837	TALDO_HUMAN	Transaldolase	TALDO1	1112900000	1107900000	1498800000	2183500000	1125900000	1445600000	1599800000	1624700000	0	0	0	0
P37840	SYUA_HUMAN	Alpha-synuclein	SNCA	16203000	16182000	17349000	18556000	0	13521000	17464000	24883000	0	0	0	0
P38117	ETFB_HUMAN	Electron transfer flavoprotein subunit beta	ETFB	83252000	64060000	110320000	99091000	106670000	80515000	97761000	78877000	79606000	0	87599000	60485000
P38159	RBMX_HUMAN	RNA-binding motif protein, X chromosome	RBMX	1320700000	1282600000	1302700000	1366200000	1278800000	1442200000	1475200000	1426400000	0	0	0	0
P38432	COIL_HUMAN	Coilin	COIL	0	0	0	0	0	0	0	5061500	0	0	0	0
P38435	VKGC_HUMAN	Vitamin K-dependent gamma-carboxylase	GGCX	21132000	0	0	0	0	0	0	0	166520000	74032000	147240000	93618000
P38571	LICH_HUMAN	Lysosomal acid lipase/cholesteryl ester hydrolase	LIPA	31957000	34985000	28911000	39573000	30327000	0	26626000	0	0	0	0	0
P38606	VATA_HUMAN	V-type proton ATPase catalytic subunit A	ATP6V1A	323370000	271490000	320890000	348680000	295080000	273310000	308630000	338310000	415380000	187520000	379030000	135880000
P38646	GRP75_HUMAN	Stress-70 protein, mitochondrial	HSPA9	2791500000	2505300000	2331400000	2469000000	1896100000	2340000000	2277800000	2352600000	1564500000	1847000000	1881200000	1355100000
P38919	IF4A3_HUMAN	Eukaryotic initiation factor 4A-III	EIF4A3	1327200000	1178100000	1394200000	1544300000	979070000	1032100000	1237300000	1089800000	93874000	68942000	0	72032000
P38935	SMBP2_HUMAN	DNA-binding protein SMUBP-2	IGHMBP2	0	0	0	0	0	0	0	0	0	0	0	7817400
P39019	RS19_HUMAN	40S ribosomal protein S19	RPS19	1495500000	1536200000	1464200000	1739600000	1796900000	1652400000	1618100000	1799800000	101320000	71558000	180000000	105940000
P39023	RL3_HUMAN	60S ribosomal protein L3	RPL3	2400200000	2388700000	1792400000	2405400000	2237700000	2007500000	2285900000	2485100000	2944500000	3847700000	2929600000	2819400000
P39060	COIA1_HUMAN	Collagen alpha-1(XVIII) chain	COL18A1	30962000	34864000	49237000	47916000	74786000	67967000	84886000	77843000	39876000	48217000	58194000	64194000
P39656	OST48_HUMAN	Dolichyl-diphosphooligosaccharide--protein glycosyltransferase 48 kDa subunit	DDOST	538010000	433740000	429970000	406180000	452150000	337830000	328760000	370720000	2406400000	2405300000	2078400000	2606100000
P39687	AN32A_HUMAN	Acidic leucine-rich nuclear phosphoprotein 32 family member A	ANP32A	236920000	212470000	187050000	185550000	171610000	183370000	171660000	156080000	0	0	0	0
P39748	FEN1_HUMAN	Flap endonuclease 1	FEN1	214830000	231430000	272590000	279290000	207960000	217750000	294140000	248560000	0	0	47348000	0
P40121	CAPG_HUMAN	Macrophage-capping protein	CAPG	85469000	99568000	103970000	118700000	164900000	140260000	153170000	145570000	0	0	0	0
P40123	CAP2_HUMAN	Adenylyl cyclase-associated protein 2	CAP2	0	20983000	0	24476000	29444000	44641000	45186000	39758000	0	0	0	0
P40189	IL6RB_HUMAN	Interleukin-6 receptor subunit beta	IL6ST	0	0	0	0	0	0	0	0	105220000	125690000	129250000	90915000
P40222	TXLNA_HUMAN	Alpha-taxilin	TXLNA	110160000	109370000	156820000	126840000	107550000	89389000	115610000	82029000	0	0	0	0
P40227	TCPZ_HUMAN	T-complex protein 1 subunit zeta	CCT6A	1931400000	1713700000	1925600000	1664800000	1500100000	1753400000	1677300000	2024800000	425880000	391110000	529710000	350880000
P40261	NNMT_HUMAN	Nicotinamide N-methyltransferase	NNMT	0	0	0	0	0	0	0	0	43031000	36476000	29109000	45454000
P40424	PBX1_HUMAN	Pre-B-cell leukemia transcription factor 1	PBX1	0	0	11388000	0	0	0	0	0	0	0	0	0
P40429	RL13A_HUMAN	60S ribosomal protein L13a	RPL13A	1714700000	1691000000	1552700000	1414700000	1829500000	1842800000	1685000000	1676700000	2636700000	2202600000	3119500000	2311600000
P40616	ARL1_HUMAN	ADP-ribosylation factor-like protein 1	ARL1	60264000	52456000	49037000	52310000	53813000	51457000	36307000	22124000	34028000	17319000	8565700	30150000
P40692	MLH1_HUMAN	DNA mismatch repair protein Mlh1	MLH1	18947000	65569000	0	58420000	39339000	48189000	56648000	43749000	0	0	0	0
P40763	STAT3_HUMAN	Signal transducer and activator of transcription 3	STAT3	94662000	50012000	116870000	97963000	83197000	91031000	150130000	93085000	92439000	0	104770000	44862000
P40818	UBP8_HUMAN	Ubiquitin carboxyl-terminal hydrolase 8	USP8	0	0	20688000	20746000	17950000	17569000	16081000	20072000	0	0	12337000	0
P40925	MDHC_HUMAN	Malate dehydrogenase, cytoplasmic	MDH1	937640000	729890000	1953900000	2003700000	1177400000	830950000	1920900000	1336400000	0	0	184260000	15552000
P40926	MDHM_HUMAN	Malate dehydrogenase, mitochondrial	MDH2	1199000000	1321100000	964410000	1038100000	1418400000	1300600000	979310000	1007200000	670250000	850150000	679810000	658020000
P40937	RFC5_HUMAN	Replication factor C subunit 5	RFC5	134800000	129570000	153450000	128370000	102930000	80735000	98054000	82924000	0	0	0	0
P40938	RFC3_HUMAN	Replication factor C subunit 3	RFC3	42490000	66569000	83876000	52878000	118230000	90533000	40295000	68878000	25562000	0	47410000	0
P40939	ECHA_HUMAN	Trifunctional enzyme subunit alpha, mitochondrial	HADHA	499260000	499600000	468700000	572290000	531160000	571080000	588630000	590700000	3733200000	2830200000	3549900000	3037800000
P41091	IF2G_HUMAN	Eukaryotic translation initiation factor 2 subunit 3	EIF2S3	583200000	878390000	769180000	802460000	707410000	820700000	958320000	982450000	464320000	419860000	518400000	175740000
P41208	CETN2_HUMAN	Centrin-2	CETN2	58357000	61949000	64788000	70544000	71447000	89823000	93966000	90443000	0	0	0	0
P41212	ETV6_HUMAN	Transcription factor ETV6	ETV6	0	0	0	1997600	0	0	0	0	0	0	0	0
P41214	EIF2D_HUMAN	Eukaryotic translation initiation factor 2D	EIF2D	4527200	0	0	3033100	0	3914600	0	3167600	0	0	0	0
P41223	BUD31_HUMAN	Protein BUD31 homolog	BUD31	0	0	0	11828000	0	0	10991000	11661000	0	0	0	0
P41227	NAA10_HUMAN	N-alpha-acetyltransferase 10	NAA10	149130000	104030000	168410000	165970000	133650000	122030000	139090000	144210000	93479000	0	0	0
P41231	P2RY2_HUMAN	P2Y purinoceptor 2	P2RY2	0	0	0	0	0	0	0	0	0	0	0	4425600
Q6NXS1	IPP2B_HUMAN	Protein phosphatase inhibitor 2 family member B	PPP1R2B	20898000	17078000	0	21035000	13883000	22978000	29573000	25187000	0	0	0	0
P41240	CSK_HUMAN	Tyrosine-protein kinase CSK	CSK	23886000	0	17904000	19268000	0	0	16784000	0	0	0	21903000	0
P41250	GARS_HUMAN	Glycine--tRNA ligase	GARS1	1546000000	1753600000	1334700000	1495100000	1077100000	1108500000	1460000000	1717100000	104650000	80668000	105150000	48637000
P41252	SYIC_HUMAN	Isoleucine--tRNA ligase, cytoplasmic	IARS1	1364500000	1330200000	1170900000	1203400000	1172700000	1130100000	1034200000	995040000	1296200000	985450000	1070800000	1219900000
P41567	EIF1_HUMAN	Eukaryotic translation initiation factor 1	EIF1	136370000	94507000	172930000	164170000	145950000	105350000	148450000	165300000	0	0	0	0
P41743	KPCI_HUMAN	Protein kinase C iota type	PRKCI	39908000	26905000	43144000	47202000	39778000	59971000	52074000	58559000	0	0	0	0
P42025	ACTY_HUMAN	Beta-centractin	ACTR1B	0	0	0	0	54224000	64301000	0	0	0	0	0	0
P42126	ECI1_HUMAN	Enoyl-CoA delta isomerase 1, mitochondrial	ECI1	83199000	79293000	61999000	77509000	102180000	71720000	116990000	84702000	0	0	25241000	0
P42166	LAP2A_HUMAN	Lamina-associated polypeptide 2, isoform alpha	TMPO	71661000	67530000	65647000	75075000	49715000	52879000	63111000	60401000	0	0	0	0
P42167	LAP2B_HUMAN	Lamina-associated polypeptide 2, isoforms beta/gamma	TMPO	285220000	370890000	335970000	384930000	295320000	250740000	356560000	362590000	96133000	126950000	99194000	105830000
P42224	STAT1_HUMAN	Signal transducer and activator of transcription 1-alpha/beta	STAT1	195710000	112020000	286120000	297010000	126340000	148320000	296630000	249340000	55905000	22895000	81996000	17293000
P42226	STAT6_HUMAN	Signal transducer and activator of transcription 6	STAT6	14632000	0	9181000	0	12041000	11390000	10069000	0	0	0	0	0
P42285	MTREX_HUMAN	Exosome RNA helicase MTR4	MTREX	211550000	115300000	252880000	220730000	146300000	156390000	147420000	152360000	59455000	46740000	62830000	62354000
P42330	AK1C3_HUMAN	Aldo-keto reductase family 1 member C3	AKR1C3	0	0	13796000	0	0	0	0	0	0	0	0	0
P42338	PK3CB_HUMAN	Phosphatidylinositol 4,5-bisphosphate 3-kinase catalytic subunit beta isoform	PIK3CB	0	0	0	0	0	0	0	0	0	0	11181000	0
P42345	MTOR_HUMAN	Serine/threonine-protein kinase mTOR	MTOR	42117000	41786000	31314000	31158000	55120000	44047000	28128000	35694000	44746000	42362000	81784000	28850000
P42356	PI4KA_HUMAN	Phosphatidylinositol 4-kinase alpha	PI4KA	0	0	0	0	0	0	0	0	102170000	48471000	67505000	0
P42566	EPS15_HUMAN	Epidermal growth factor receptor substrate 15	EPS15	0	0	0	10320000	13301000	12717000	17165000	0	0	0	0	0
P42574	CASP3_HUMAN	Caspase-3	CASP3	361020000	311940000	379520000	358830000	418300000	418840000	537870000	507400000	0	0	0	0
P42677	RS27_HUMAN	40S ribosomal protein S27	RPS27	717980000	792090000	839560000	1026500000	541840000	608550000	794580000	576090000	610060000	388120000	690840000	625510000
P42694	HELZ_HUMAN	Probable helicase with zinc finger domain	HELZ	0	0	4113200	0	0	0	0	0	0	0	0	0
P42696	RBM34_HUMAN	RNA-binding protein 34	RBM34	54122000	67011000	88934000	80510000	60882000	53648000	39773000	50434000	0	0	0	0
P42704	LPPRC_HUMAN	Leucine-rich PPR motif-containing protein, mitochondrial	LRPPRC	2075300000	2001900000	1909100000	1850400000	1661500000	2103000000	1843800000	1936200000	1142800000	1086200000	1612300000	1073800000
P42765	THIM_HUMAN	3-ketoacyl-CoA thiolase, mitochondrial	ACAA2	426740000	447270000	485050000	575210000	545700000	407280000	406440000	513150000	656440000	441710000	550230000	446300000
P42766	RL35_HUMAN	60S ribosomal protein L35	RPL35	1568500000	1949200000	1816600000	1703600000	1203300000	1038300000	1348900000	1565600000	985160000	708240000	689350000	787830000
P42785	PCP_HUMAN	Lysosomal Pro-X carboxypeptidase	PRCP	51208000	50916000	46091000	55777000	27752000	40330000	46728000	46947000	275880000	390720000	229140000	215230000
P42858	HD_HUMAN	Huntingtin	HTT	0	10009000	12607000	12907000	10907000	11854000	0	0	0	0	0	0
P43034	LIS1_HUMAN	Platelet-activating factor acetylhydrolase IB subunit beta	PAFAH1B1	273310000	234380000	314290000	328420000	333510000	344690000	434080000	405660000	1279200000	1065200000	1267800000	1093100000
P43121	MUC18_HUMAN	Cell surface glycoprotein MUC18	MCAM	55899000	0	19441000	21665000	35091000	25004000	73013000	94925000	6344200000	6277800000	6993300000	1545300000
P43155	CACP_HUMAN	Carnitine O-acetyltransferase	CRAT	0	0	0	0	0	0	0	0	27420000	28061000	34745000	0
P43243	MATR3_HUMAN	Matrin-3	MATR3	1129400000	1218500000	1410900000	1358000000	992300000	955130000	1234300000	1045000000	209930000	139130000	263000000	186770000
P43246	MSH2_HUMAN	DNA mismatch repair protein Msh2	MSH2	695390000	630780000	888770000	991800000	480650000	507800000	672260000	583530000	0	0	0	0
P43304	GPDM_HUMAN	Glycerol-3-phosphate dehydrogenase, mitochondrial	GPD2	109560000	73605000	128220000	133370000	88414000	85064000	116070000	113360000	200260000	200010000	186050000	276500000
P43307	SSRA_HUMAN	Translocon-associated protein subunit alpha	SSR1	112660000	195980000	237170000	99646000	102820000	112050000	93661000	90450000	216380000	250250000	193390000	250090000
P43487	RANG_HUMAN	Ran-specific GTPase-activating protein	RANBP1	367570000	456430000	415130000	538980000	475290000	606720000	586990000	857590000	0	0	0	0
P43490	NAMPT_HUMAN	Nicotinamide phosphoribosyltransferase	NAMPT	291130000	207470000	444110000	422390000	135030000	279360000	299750000	272520000	279240000	158040000	206280000	85722000
P43686	PRS6B_HUMAN	26S proteasome regulatory subunit 6B	PSMC4	409780000	381500000	540490000	519680000	382630000	400460000	533520000	451210000	815710000	633390000	1112100000	429430000
P43897	EFTS_HUMAN	Elongation factor Ts, mitochondrial	TSFM	39678000	37634000	47684000	42712000	42517000	38467000	46895000	42352000	45887000	0	49469000	38772000
P45877	PPIC_HUMAN	Peptidyl-prolyl cis-trans isomerase C	PPIC	0	0	0	0	0	0	0	0	0	0	15533000	0
P45880	VDAC2_HUMAN	Voltage-dependent anion-selective channel protein 2	VDAC2	989330000	1343300000	1373100000	1561900000	1511200000	1458400000	1644800000	1802500000	4265300000	3091000000	3218900000	4361300000
P45954	ACDSB_HUMAN	Short/branched chain specific acyl-CoA dehydrogenase, mitochondrial	ACADSB	0	0	0	0	0	0	0	0	34121000	0	34200000	0
P45973	CBX5_HUMAN	Chromobox protein homolog 5	CBX5	180520000	137690000	208030000	234220000	210910000	185220000	169670000	278220000	0	0	0	0
P45974	UBP5_HUMAN	Ubiquitin carboxyl-terminal hydrolase 5	USP5	187110000	135100000	311700000	302220000	153390000	176370000	189390000	279880000	135450000	91587000	121240000	62474000
P45984	MK09_HUMAN	Mitogen-activated protein kinase 9	MAPK9	0	0	0	0	0	0	0	12356000	0	0	0	0
P45985	MP2K4_HUMAN	Dual specificity mitogen-activated protein kinase kinase 4	MAP2K4	21744000	16922000	22181000	24296000	24347000	21980000	28872000	29743000	0	0	0	0
P46013	KI67_HUMAN	Proliferation marker protein Ki-67	MKI67	591820000	526380000	615690000	632220000	281880000	355320000	517800000	525260000	0	0	0	0
P46060	RAGP1_HUMAN	Ran GTPase-activating protein 1	RANGAP1	451030000	504880000	479780000	487500000	483640000	412890000	666740000	446490000	102070000	0	132060000	71839000
P46063	RECQ1_HUMAN	ATP-dependent DNA helicase Q1	RECQL	246190000	227910000	255540000	296120000	153210000	184170000	188530000	197630000	844120000	789460000	951530000	481400000
P46087	NOP2_HUMAN	Probable 28S rRNA (cytosine(4447)-C(5))-methyltransferase	NOP2	214760000	208600000	199600000	215250000	192240000	161270000	280560000	297800000	45959000	20403000	43087000	40198000
P46100	ATRX_HUMAN	Transcriptional regulator ATRX	ATRX	20715000	0	18362000	16816000	0	0	13539000	12543000	0	0	0	0
P46108	CRK_HUMAN	Adapter molecule crk	CRK	95709000	78174000	78668000	76633000	106360000	96977000	94519000	87405000	0	0	0	0
P46109	CRKL_HUMAN	Crk-like protein	CRKL	78307000	68889000	83846000	96709000	95476000	79169000	83025000	76106000	0	0	0	0
P46379	BAG6_HUMAN	Large proline-rich protein BAG6	BAG6	172170000	165390000	195880000	200450000	175290000	156340000	247170000	202420000	25315000	0	0	0
P46459	NSF_HUMAN	Vesicle-fusing ATPase	NSF	68130000	25224000	57981000	78011000	33120000	26979000	40717000	68195000	572450000	326550000	627700000	306020000
P46531	NOTC1_HUMAN	Neurogenic locus notch homolog protein 1	NOTCH1	0	0	0	0	0	0	0	0	19611000	0	0	0
P46734	MP2K3_HUMAN	Dual specificity mitogen-activated protein kinase kinase 3	MAP2K3	0	0	0	0	0	0	0	0	0	28449000	68776000	40566000
P46736	BRCC3_HUMAN	Lys-63-specific deubiquitinase BRCC36	BRCC3	0	0	0	0	0	0	40372000	0	0	0	0	0
P46776	RL27A_HUMAN	60S ribosomal protein L27a	RPL27A	428850000	698090000	436680000	503180000	544420000	630690000	525050000	644740000	560930000	637620000	596560000	704670000
P46777	RL5_HUMAN	60S ribosomal protein L5	RPL5	2324300000	1883500000	2282200000	2503800000	2063800000	2198000000	2866100000	2635400000	1336000000	1263200000	1305400000	1327000000
P46778	RL21_HUMAN	60S ribosomal protein L21	RPL21	1296100000	1032900000	1123600000	1092100000	1205500000	1028900000	1298600000	1387000000	1343300000	1340000000	1546100000	705370000
P46779	RL28_HUMAN	60S ribosomal protein L28	RPL28	326180000	434650000	163680000	241110000	235550000	292370000	426940000	264280000	599520000	617000000	794270000	646910000
P46781	RS9_HUMAN	40S ribosomal protein S9	RPS9	3810300000	4192000000	3243300000	3034100000	3410400000	3499900000	2873900000	3149100000	2901800000	2259900000	2737400000	2627000000
P46782	RS5_HUMAN	40S ribosomal protein S5	RPS5	1692300000	1601800000	1657700000	1350000000	1071000000	1291700000	1425100000	1374000000	979930000	629800000	2652300000	2206200000
P46783	RS10_HUMAN	40S ribosomal protein S10	RPS10	492550000	690510000	1042000000	801280000	565710000	632820000	984260000	681570000	113530000	74064000	83135000	109160000
P46821	MAP1B_HUMAN	Microtubule-associated protein 1B	MAP1B	949640000	641020000	1148500000	1253600000	1659200000	1624100000	1449700000	2130600000	891880000	356040000	845470000	612220000
P46926	GNPI1_HUMAN	Glucosamine-6-phosphate isomerase 1	GNPDA1	211780000	171020000	210480000	195820000	182420000	223100000	198960000	202880000	0	0	0	0
P46937	YAP1_HUMAN	Transcriptional coactivator YAP1	YAP1	40222000	43744000	40546000	46836000	43716000	44224000	66739000	95116000	0	0	0	0
P46939	UTRN_HUMAN	Utrophin	UTRN	59827000	46659000	72663000	63694000	65935000	61855000	91064000	83365000	559910000	368020000	615040000	395780000
P46940	IQGA1_HUMAN	Ras GTPase-activating-like protein IQGAP1	IQGAP1	1078400000	1151000000	1354400000	1353200000	1024500000	1018300000	1037500000	1063300000	2670600000	1783400000	2559100000	2176800000
P46976	GLYG_HUMAN	Glycogenin-1	GYG1	33123000	0	0	0	0	14204000	18960000	14469000	269080000	143500000	248060000	0
P46977	STT3A_HUMAN	Dolichyl-diphosphooligosaccharide--protein glycosyltransferase subunit STT3A	STT3A	203980000	194300000	203840000	245750000	137040000	172150000	143140000	220570000	1458100000	1056900000	1341100000	1425000000
P47224	MSS4_HUMAN	Guanine nucleotide exchange factor MSS4	RABIF	0	0	0	0	0	0	0	0	0	0	0	10274000
P47755	CAZA2_HUMAN	F-actin-capping protein subunit alpha-2	CAPZA2	131630000	98190000	132870000	137270000	85568000	112730000	137710000	162300000	39299000	0	29998000	0
P47813	IF1AX_HUMAN	Eukaryotic translation initiation factor 1A, X-chromosomal	EIF1AX	374720000	380870000	341690000	350360000	265150000	288030000	344380000	292000000	0	0	0	0
P47897	SYQ_HUMAN	Glutamine--tRNA ligase	QARS1	502950000	459750000	479030000	488150000	513310000	481100000	452240000	459700000	723620000	795510000	856310000	709070000
P47914	RL29_HUMAN	60S ribosomal protein L29	RPL29	606680000	657560000	569630000	639660000	754850000	903070000	781660000	726970000	790160000	497740000	1025000000	460970000
P47985	UCRI_HUMAN	Cytochrome b-c1 complex subunit Rieske, mitochondrial	UQCRFS1	95855000	100560000	116950000	160370000	108600000	73513000	141700000	73622000	155150000	0	88386000	89488000
P48047	ATPO_HUMAN	ATP synthase subunit O, mitochondrial	ATP5PO	812200000	787740000	1120200000	747420000	1111700000	698710000	963340000	1135200000	824690000	1062200000	1184700000	1017500000
P48059	LIMS1_HUMAN	LIM and senescent cell antigen-like-containing domain protein 1	LIMS1	0	0	0	0	0	0	0	0	0	72587000	55928000	57106000
P48060	GLIP1_HUMAN	Glioma pathogenesis-related protein 1	GLIPR1	0	0	0	0	0	0	0	0	67201000	0	63106000	0
P48147	PPCE_HUMAN	Prolyl endopeptidase	PREP	175260000	122410000	218680000	307860000	105990000	149830000	171130000	138150000	0	0	0	0
P48163	MAOX_HUMAN	NADP-dependent malic enzyme	ME1	0	43651000	0	210460000	0	62793000	0	59695000	0	0	0	0
P48307	TFPI2_HUMAN	Tissue factor pathway inhibitor 2	TFPI2	0	0	0	0	0	0	24981000	0	0	0	0	0
P48426	PI42A_HUMAN	Phosphatidylinositol 5-phosphate 4-kinase type-2 alpha	PIP4K2A	0	0	0	0	11325000	0	0	0	0	0	0	0
P48444	COPD_HUMAN	Coatomer subunit delta	ARCN1	463620000	326240000	381710000	369370000	254680000	392060000	340440000	252670000	293170000	226100000	357590000	232130000
P48449	LSS_HUMAN	Lanosterol synthase	LSS	163850000	156440000	190160000	172510000	194630000	219260000	234540000	235280000	325410000	240460000	233980000	228710000
P48506	GSH1_HUMAN	Glutamate--cysteine ligase catalytic subunit	GCLC	19924000	17162000	25846000	16626000	0	11556000	15554000	18629000	0	0	0	0
P48507	GSH0_HUMAN	Glutamate--cysteine ligase regulatory subunit	GCLM	23996000	31857000	23587000	23622000	35338000	30151000	28862000	36666000	47276000	0	31631000	0
P48509	CD151_HUMAN	CD151 antigen	CD151	0	0	0	0	0	0	0	0	0	44749000	50186000	60909000
P48556	PSMD8_HUMAN	26S proteasome non-ATPase regulatory subunit 8	PSMD8	303270000	300360000	274160000	278930000	262210000	280370000	233550000	266700000	0	0	0	0
P48634	PRC2A_HUMAN	Protein PRRC2A	PRRC2A	82472000	73837000	83825000	80415000	64334000	48659000	57641000	49636000	0	0	0	0
P48637	GSHB_HUMAN	Glutathione synthetase	GSS	72847000	60139000	79468000	79379000	84383000	90752000	108560000	111730000	0	0	0	0
P48643	TCPE_HUMAN	T-complex protein 1 subunit epsilon	CCT5	1947800000	1508100000	2331300000	1954600000	1504000000	1385600000	2964900000	2590600000	242980000	296320000	168740000	201590000
P48651	PTSS1_HUMAN	Phosphatidylserine synthase 1	PTDSS1	0	0	0	0	0	0	0	0	53378000	28306000	28378000	67519000
P48681	NEST_HUMAN	Nestin	NES	1047700000	1040700000	1915100000	1902800000	3347700000	4570100000	5683200000	5254600000	29433000	0	29154000	8109600
P48723	HSP13_HUMAN	Heat shock 70 kDa protein 13	HSPA13	0	0	0	0	0	0	0	0	23780000	28377000	42043000	0
P48729	KC1A_HUMAN	Casein kinase I isoform alpha	CSNK1A1	59798000	59377000	62305000	77819000	81368000	50920000	76689000	60925000	86703000	86892000	107510000	90783000
P48730	KC1D_HUMAN	Casein kinase I isoform delta	CSNK1D	0	0	0	0	0	12624000	13115000	18223000	0	0	0	0
P48735	IDHP_HUMAN	Isocitrate dehydrogenase [NADP], mitochondrial	IDH2	199110000	191050000	198480000	183430000	159310000	230500000	185780000	237830000	688400000	597110000	931280000	661080000
P48739	PIPNB_HUMAN	Phosphatidylinositol transfer protein beta isoform	PITPNB	123870000	130950000	154710000	174530000	139570000	137390000	138400000	145460000	123520000	130190000	170180000	126610000
P49005	DPOD2_HUMAN	DNA polymerase delta subunit 2	POLD2	17270000	19583000	18400000	16470000	16368000	26005000	19227000	21797000	0	0	0	0
P49006	MRP_HUMAN	MARCKS-related protein	MARCKSL1	155520000	234840000	243690000	213500000	111150000	46622000	110010000	294320000	319170000	109990000	315430000	49686000
P49023	PAXI_HUMAN	Paxillin	PXN	94667000	100640000	136640000	128790000	165820000	203230000	230950000	238020000	220650000	234520000	223710000	200070000
P49069	CAMLG_HUMAN	Guided entry of tail-anchored proteins factor CAMLG	CAMLG	0	0	0	0	0	0	0	0	0	0	0	11495000
P49184	DNSL1_HUMAN	Deoxyribonuclease-1-like 1	DNASE1L1	0	0	0	0	0	0	0	0	183530000	235940000	128090000	187850000
P49189	AL9A1_HUMAN	4-trimethylaminobutyraldehyde dehydrogenase	ALDH9A1	282900000	279810000	341950000	356480000	218300000	172460000	278270000	278010000	83422000	49360000	86940000	33744000
P49207	RL34_HUMAN	60S ribosomal protein L34	RPL34	529510000	494250000	500940000	699380000	482920000	518450000	498490000	0	793930000	995020000	657190000	296140000
P49257	LMAN1_HUMAN	Protein ERGIC-53	LMAN1	142750000	168490000	298190000	241650000	189040000	139620000	239590000	146620000	1099700000	1120200000	1083000000	1272500000
P49321	NASP_HUMAN	Nuclear autoantigenic sperm protein	NASP	2479200000	1558900000	1836300000	2304500000	1525700000	785430000	2392400000	2322800000	0	0	0	0
P49327	FAS_HUMAN	Fatty acid synthase	FASN	9633300000	8731800000	13459000000	14514000000	8452500000	8866800000	10643000000	11840000000	2698900000	2084100000	2686100000	2336400000
P49354	FNTA_HUMAN	Protein farnesyltransferase/geranylgeranyltransferase type-1 subunit alpha	FNTA	33064000	36271000	30198000	31051000	35677000	25599000	27352000	20316000	0	0	0	0
P49366	DHYS_HUMAN	Deoxyhypusine synthase	DHPS	24363000	13642000	18046000	16784000	17634000	23175000	23614000	15643000	0	0	0	0
P49368	TCPG_HUMAN	T-complex protein 1 subunit gamma	CCT3	2272300000	2154900000	2042800000	1944600000	2393800000	1967400000	1761300000	1916600000	517590000	471380000	521620000	492330000
P49406	RM19_HUMAN	39S ribosomal protein L19, mitochondrial	MRPL19	66991000	63922000	56858000	52526000	0	0	51537000	0	0	0	0	0
P49407	ARRB1_HUMAN	Beta-arrestin-1	ARRB1	32175000	0	23919000	27618000	53783000	42737000	52482000	54924000	0	0	48493000	0
P49411	EFTU_HUMAN	Elongation factor Tu, mitochondrial	TUFM	1913700000	1798300000	1838400000	1840100000	1296700000	1464300000	1386100000	1617600000	2159700000	1938200000	2060200000	2458900000
P49419	AL7A1_HUMAN	Alpha-aminoadipic semialdehyde dehydrogenase	ALDH7A1	530470000	489930000	962390000	908820000	501130000	374020000	563620000	796110000	67990000	51843000	33729000	29590000
P49427	UB2R1_HUMAN	Ubiquitin-conjugating enzyme E2 R1	CDC34	41261000	29675000	41897000	46023000	37890000	43380000	0	43093000	0	0	0	0
P49454	CENPF_HUMAN	Centromere protein F	CENPF	13314000	20548000	15389000	11170000	13774000	13868000	15490000	17496000	0	0	0	0
P49458	SRP09_HUMAN	Signal recognition particle 9 kDa protein	SRP9	203550000	230780000	291730000	274280000	236890000	227770000	263960000	286480000	0	0	0	0
P49459	UBE2A_HUMAN	Ubiquitin-conjugating enzyme E2 A	UBE2A	24621000	0	0	0	25931000	22095000	0	0	0	0	0	0
P49585	PCY1A_HUMAN	Choline-phosphate cytidylyltransferase A	PCYT1A	21346000	0	0	0	0	0	0	0	51236000	36259000	43412000	56514000
P49588	SYAC_HUMAN	Alanine--tRNA ligase, cytoplasmic	AARS1	1490300000	1316700000	1727300000	1741800000	1145000000	1157700000	1553600000	1469100000	471110000	253820000	351750000	87414000
P49589	SYCC_HUMAN	Cysteine--tRNA ligase, cytoplasmic	CARS1	199850000	192810000	203920000	183630000	227140000	232060000	238710000	201930000	0	0	0	0
P49591	SYSC_HUMAN	Serine--tRNA ligase, cytoplasmic	SARS1	262190000	206590000	167770000	254310000	279640000	266370000	404950000	385290000	50131000	0	0	0
P49593	PPM1F_HUMAN	Protein phosphatase 1F	PPM1F	0	0	0	0	0	0	24243000	0	38173000	42288000	33238000	38594000
P49642	PRI1_HUMAN	DNA primase small subunit	PRIM1	15691000	0	13861000	11668000	15123000	18561000	15415000	14110000	0	0	0	0
P49643	PRI2_HUMAN	DNA primase large subunit	PRIM2	19206000	0	0	22541000	36706000	32381000	35607000	34697000	0	0	0	0
P49674	KC1E_HUMAN	Casein kinase I isoform epsilon	CSNK1E	35327000	29750000	35052000	39880000	34249000	27344000	30859000	25384000	0	0	0	0
P49720	PSB3_HUMAN	Proteasome subunit beta type-3	PSMB3	65846000	68555000	70882000	82375000	82749000	98193000	90297000	70427000	53138000	44472000	74954000	14015000
P49721	PSB2_HUMAN	Proteasome subunit beta type-2	PSMB2	465630000	294960000	413340000	374590000	228940000	455890000	481630000	334610000	78745000	0	80358000	0
P49736	MCM2_HUMAN	DNA replication licensing factor MCM2	MCM2	1039400000	993080000	1099700000	1061100000	533390000	570310000	731570000	758140000	70240000	20026000	48597000	33708000
P49746	TSP3_HUMAN	Thrombospondin-3	THBS3	0	0	0	0	0	0	0	0	0	0	0	3072500
P49748	ACADV_HUMAN	Very long-chain specific acyl-CoA dehydrogenase, mitochondrial	ACADVL	166340000	103850000	118200000	117140000	149040000	120830000	136710000	126040000	1424100000	758970000	1220700000	927340000
P49750	YLPM1_HUMAN	YLP motif-containing protein 1	YLPM1	85537000	74027000	110740000	109820000	83013000	65708000	95971000	105000000	0	0	0	0
P49754	VPS41_HUMAN	Vacuolar protein sorting-associated protein 41 homolog	VPS41	0	0	0	0	0	0	0	0	6789000	0	0	0
P49755	TMEDA_HUMAN	Transmembrane emp24 domain-containing protein 10	TMED10	433890000	347330000	465500000	520660000	457710000	451990000	566260000	527760000	2644400000	2610700000	3239400000	2851000000
P49756	RBM25_HUMAN	RNA-binding protein 25	RBM25	117550000	76078000	91118000	93748000	82600000	71414000	106060000	96965000	0	0	0	0
P49757	NUMB_HUMAN	Protein numb homolog	NUMB	0	0	55350000	54346000	0	0	0	53828000	50980000	35471000	49317000	44410000
P49768	PSN1_HUMAN	Presenilin-1	PSEN1	18641000	0	0	0	0	0	0	0	0	0	62659000	0
P49770	EI2BB_HUMAN	Translation initiation factor eIF-2B subunit beta	EIF2B2	29954000	0	37004000	37348000	33803000	35908000	33336000	35135000	0	0	0	0
P49773	HINT1_HUMAN	Histidine triad nucleotide-binding protein 1	HINT1	313980000	246250000	274220000	279280000	262840000	344770000	409070000	416460000	0	0	0	0
P49790	NU153_HUMAN	Nuclear pore complex protein Nup153	NUP153	102630000	96470000	114310000	99473000	110100000	97670000	109220000	105860000	0	0	0	0
P49792	RBP2_HUMAN	E3 SUMO-protein ligase RanBP2	RANBP2	444980000	403890000	630560000	602420000	439690000	432110000	633210000	569320000	251100000	92890000	256660000	119310000
P49810	PSN2_HUMAN	Presenilin-2	PSEN2	0	0	0	0	0	0	0	0	0	0	22243000	0
P49815	TSC2_HUMAN	Tuberin	TSC2	0	0	0	0	0	0	0	0	6313800	0	0	0
P49821	NDUV1_HUMAN	NADH dehydrogenase [ubiquinone] flavoprotein 1, mitochondrial	NDUFV1	116880000	111510000	81144000	90675000	97150000	111700000	70754000	83656000	326310000	259530000	279990000	304210000
P49840	GSK3A_HUMAN	Glycogen synthase kinase-3 alpha	GSK3A	0	0	11586000	0	0	8769900	9790700	10723000	0	0	0	0
P49841	GSK3B_HUMAN	Glycogen synthase kinase-3 beta	GSK3B	32816000	0	45627000	0	31743000	43393000	0	39342000	65813000	53033000	70807000	46618000
P49848	TAF6_HUMAN	Transcription initiation factor TFIID subunit 6	TAF6	0	7292400	0	0	0	0	0	0	0	0	0	0
P49902	5NTC_HUMAN	Cytosolic purine 5'-nucleotidase	NT5C2	100620000	69336000	110770000	101720000	111890000	109260000	137190000	85359000	0	0	0	0
P49903	SPS1_HUMAN	Selenide, water dikinase 1	SEPHS1	414300000	263080000	230920000	232940000	155420000	184230000	182890000	208470000	0	0	0	0
P49915	GUAA_HUMAN	GMP synthase [glutamine-hydrolyzing]	GMPS	1038000000	477250000	1077400000	814320000	312190000	395690000	573000000	472020000	0	0	61679000	0
P49916	DNLI3_HUMAN	DNA ligase 3	LIG3	65138000	79275000	85201000	98794000	80638000	71986000	59246000	52593000	0	0	0	16786000
P49959	MRE11_HUMAN	Double-strand break repair protein MRE11	MRE11	50946000	36411000	44125000	53037000	55216000	35895000	58339000	44574000	0	0	0	0
P50148	GNAQ_HUMAN	Guanine nucleotide-binding protein G(q) subunit alpha	GNAQ	28957000	28975000	36271000	0	0	0	35388000	34749000	34506000	55337000	78715000	20706000
P50213	IDH3A_HUMAN	Isocitrate dehydrogenase [NAD] subunit alpha, mitochondrial	IDH3A	127860000	124430000	97101000	87018000	123690000	104510000	125640000	118960000	68649000	116830000	134290000	72115000
P50281	MMP14_HUMAN	Matrix metalloproteinase-14	MMP14	44036000	0	16865000	23021000	30692000	20897000	19656000	48820000	1046900000	834190000	1182600000	770460000
P50336	PPOX_HUMAN	Protoporphyrinogen oxidase	PPOX	0	0	26678000	0	0	30303000	0	30481000	36701000	22343000	30257000	0
P50395	GDIB_HUMAN	Rab GDP dissociation inhibitor beta	GDI2	1876600000	2065100000	2882800000	2636200000	1554300000	2002400000	2168400000	2619500000	411950000	215730000	437150000	266260000
P50402	EMD_HUMAN	Emerin	EMD	146060000	135590000	149970000	151040000	168580000	140710000	210070000	182270000	435550000	387730000	325290000	492910000
P50416	CPT1A_HUMAN	Carnitine O-palmitoyltransferase 1, liver isoform	CPT1A	5162700	0	0	0	0	0	0	0	5269000000	2975100000	3612100000	3535900000
P50440	GATM_HUMAN	Glycine amidinotransferase, mitochondrial	GATM	25359000	0	0	0	0	0	13431000	22680000	0	0	0	0
P50452	SPB8_HUMAN	Serpin B8	SERPINB8	0	0	0	0	0	0	0	18419000	0	0	0	0
P50453	SPB9_HUMAN	Serpin B9	SERPINB9	489050000	491400000	576100000	519830000	1235900000	1333700000	1711600000	1457400000	0	63033000	74407000	0
P50454	SERPH_HUMAN	Serpin H1	SERPINH1	3630800000	3567900000	4033700000	4188600000	3232100000	2956900000	3880900000	3410300000	5447100000	4737900000	4687800000	4304800000
P50479	PDLI4_HUMAN	PDZ and LIM domain protein 4	PDLIM4	0	0	0	0	0	55247000	0	0	0	0	48417000	0
P50502	F10A1_HUMAN	Hsc70-interacting protein	ST13	768300000	479440000	1183800000	1075100000	977090000	820150000	1008200000	951820000	0	0	0	0
P50552	VASP_HUMAN	Vasodilator-stimulated phosphoprotein	VASP	323660000	337230000	449000000	479760000	457480000	449170000	592490000	666070000	140240000	45128000	144520000	119540000
P50570	DYN2_HUMAN	Dynamin-2	DNM2	222660000	184400000	193480000	211160000	228940000	239150000	243260000	234380000	365950000	222080000	269340000	253740000
P50579	MAP2_HUMAN	Methionine aminopeptidase 2	METAP2	440200000	404690000	474800000	597870000	381090000	366340000	563040000	455350000	375230000	72295000	123010000	204460000
P50613	CDK7_HUMAN	Cyclin-dependent kinase 7	CDK7	11003000	0	9896200	10401000	10975000	10489000	8576000	10189000	0	0	0	0
P50748	KNTC1_HUMAN	Kinetochore-associated protein 1	KNTC1	41393000	41193000	19504000	28182000	39155000	30348000	22480000	27397000	0	0	0	0
P50750	CDK9_HUMAN	Cyclin-dependent kinase 9	CDK9	0	0	0	0	20020000	0	0	16875000	0	0	0	0
P50895	BCAM_HUMAN	Basal cell adhesion molecule	BCAM	35820000	36446000	45199000	45429000	24179000	32092000	47540000	55796000	0	0	23587000	0
P50897	PPT1_HUMAN	Palmitoyl-protein thioesterase 1	PPT1	57074000	50646000	56758000	72880000	43864000	53321000	44134000	47128000	0	0	0	0
P50914	RL14_HUMAN	60S ribosomal protein L14	RPL14	1652800000	1589900000	1601600000	2056500000	1893000000	1725500000	2219500000	1606500000	4105200000	3040300000	4403400000	3271100000
P50990	TCPQ_HUMAN	T-complex protein 1 subunit theta	CCT8	3214700000	2690100000	3396600000	3322700000	3221800000	2890900000	3628500000	3386100000	216980000	43004000	184050000	98227000
P50991	TCPD_HUMAN	T-complex protein 1 subunit delta	CCT4	1645800000	1182000000	2517900000	1965400000	1615500000	1723900000	2161600000	1839100000	228580000	160780000	200490000	212850000
P50993	AT1A2_HUMAN	Sodium/potassium-transporting ATPase subunit alpha-2	ATP1A2	104130000	156470000	103210000	0	0	0	0	0	0	0	0	0
P50995	ANX11_HUMAN	Annexin A11	ANXA11	171380000	139230000	162810000	183870000	181740000	164910000	222360000	250000000	0	0	45079000	0
P51003	PAPOA_HUMAN	Poly(A) polymerase alpha	PAPOLA	37996000	38855000	34693000	34243000	32862000	32353000	26734000	28500000	0	0	0	0
P51114	FXR1_HUMAN	Fragile X mental retardation syndrome-related protein 1	FXR1	531310000	521360000	586100000	548430000	503890000	480110000	520400000	464050000	264730000	105140000	201860000	127620000
P51116	FXR2_HUMAN	Fragile X mental retardation syndrome-related protein 2	FXR2	10561000	0	17199000	18274000	29368000	23514000	22716000	36378000	0	0	12397000	0
P51148	RAB5C_HUMAN	Ras-related protein Rab-5C	RAB5C	277860000	304830000	306110000	299420000	287200000	267970000	266900000	291780000	1407000000	1279800000	958510000	1346800000
P51149	RAB7A_HUMAN	Ras-related protein Rab-7a	RAB7A	554110000	525120000	551670000	579130000	654320000	708580000	610170000	684850000	1915600000	2011300000	2035500000	2549200000
P51151	RAB9A_HUMAN	Ras-related protein Rab-9A	RAB9A	19162000	0	0	0	25142000	0	21119000	24229000	76767000	62939000	73075000	61820000
P51153	RAB13_HUMAN	Ras-related protein Rab-13	RAB13	216040000	166600000	177210000	204710000	206980000	234400000	186080000	134970000	258260000	216380000	272560000	178170000
P51159	RB27A_HUMAN	Ras-related protein Rab-27A	RAB27A	0	0	0	0	0	0	0	0	66058000	69997000	65072000	70771000
P51178	PLCD1_HUMAN	1-phosphatidylinositol 4,5-bisphosphate phosphodiesterase delta-1	PLCD1	0	0	6345900	0	10158000	0	0	9123000	0	0	0	0
P51398	RT29_HUMAN	28S ribosomal protein S29, mitochondrial	DAP3	49831000	47800000	51347000	47100000	65862000	42561000	50953000	39507000	35769000	0	33082000	0
P51452	DUS3_HUMAN	Dual specificity protein phosphatase 3	DUSP3	33420000	29974000	20888000	28748000	35793000	32269000	29907000	37143000	0	0	0	0
P51511	MMP15_HUMAN	Matrix metalloproteinase-15	MMP15	0	0	0	0	7773000	0	0	0	0	0	0	0
P51530	DNA2_HUMAN	DNA replication ATP-dependent helicase/nuclease DNA2	DNA2	0	0	0	0	0	0	5305400	0	0	0	0	0
P51532	SMCA4_HUMAN	Transcription activator BRG1	SMARCA4	625450000	689190000	673320000	343460000	278070000	460300000	404480000	609860000	109760000	0	33454000	48473000
P51553	IDH3G_HUMAN	Isocitrate dehydrogenase [NAD] subunit gamma, mitochondrial	IDH3G	0	0	0	0	0	0	0	0	88213000	0	27925000	0
P51570	GALK1_HUMAN	Galactokinase	GALK1	16579000	28311000	25508000	26744000	26286000	23393000	19833000	25350000	0	44363000	51394000	39415000
P51571	SSRD_HUMAN	Translocon-associated protein subunit delta	SSR4	176130000	139200000	171620000	183890000	110910000	146900000	159520000	176000000	572110000	525230000	449710000	603460000
P51572	BAP31_HUMAN	B-cell receptor-associated protein 31	BCAP31	395430000	479630000	479180000	452270000	505820000	444080000	502550000	579490000	5398900000	3619500000	4541700000	4464100000
P51636	CAV2_HUMAN	Caveolin-2	CAV2	0	0	0	0	0	0	0	0	88794000	44168000	73073000	0
P51648	AL3A2_HUMAN	Aldehyde dehydrogenase family 3 member A2	ALDH3A2	175390000	192460000	168570000	204900000	236760000	225110000	255600000	254460000	269180000	107930000	246860000	238630000
P51659	DHB4_HUMAN	Peroxisomal multifunctional enzyme type 2	HSD17B4	1310500000	1414000000	1271000000	1231000000	831030000	875380000	960180000	1101000000	997140000	1004600000	1134200000	942480000
P51665	PSMD7_HUMAN	26S proteasome non-ATPase regulatory subunit 7	PSMD7	302080000	316520000	305580000	396370000	389000000	325310000	522170000	549570000	65599000	45041000	34009000	34942000
P51688	SPHM_HUMAN	N-sulphoglucosamine sulphohydrolase	SGSH	0	0	0	0	0	0	0	17072000	32241000	0	47208000	21075000
P51692	STA5B_HUMAN	Signal transducer and activator of transcription 5B	STAT5B	25411000	0	23578000	21549000	25515000	27182000	26963000	28921000	0	0	0	0
P51784	UBP11_HUMAN	Ubiquitin carboxyl-terminal hydrolase 11	USP11	39454000	23082000	30288000	25635000	67238000	59869000	57793000	65886000	0	0	0	0
P51790	CLCN3_HUMAN	H(+)/Cl(-) exchange transporter 3	CLCN3	0	0	0	0	0	0	0	0	40739000	0	29228000	32063000
P51793	CLCN4_HUMAN	H(+)/Cl(-) exchange transporter 4	CLCN4	0	0	0	0	0	0	0	0	0	0	0	21973000
P51798	CLCN7_HUMAN	H(+)/Cl(-) exchange transporter 7	CLCN7	0	0	0	0	0	0	0	0	53414000	83745000	104780000	65893000
P51805	PLXA3_HUMAN	Plexin-A3	PLXNA3	0	0	0	0	0	0	0	0	15391000	23453000	0	14366000
P51809	VAMP7_HUMAN	Vesicle-associated membrane protein 7	VAMP7	0	0	0	0	0	0	0	0	184440000	52694000	131460000	91698000
P51810	GP143_HUMAN	G-protein coupled receptor 143	GPR143	0	0	0	0	0	0	0	0	0	0	0	68888000
P51812	KS6A3_HUMAN	Ribosomal protein S6 kinase alpha-3	RPS6KA3	0	0	0	0	16339000	14818000	18485000	0	22811000	16422000	27066000	19952000
P51813	BMX_HUMAN	Cytoplasmic tyrosine-protein kinase BMX	BMX	0	0	0	0	0	0	0	0	18518000	14695000	0	0
P51828	ADCY7_HUMAN	Adenylate cyclase type 7	ADCY7	0	0	0	0	0	0	0	0	0	0	1339000	0
P51858	HDGF_HUMAN	Hepatoma-derived growth factor	HDGF	339780000	300690000	318710000	330660000	318550000	232410000	301390000	358210000	0	0	0	0
P51911	CNN1_HUMAN	Calponin-1	CNN1	141540000	132380000	172440000	159630000	246500000	305420000	411160000	314280000	0	0	0	0
P51948	MAT1_HUMAN	CDK-activating kinase assembly factor MAT1	MNAT1	0	11456000	0	15691000	0	11144000	15664000	16753000	0	0	0	0
P51965	UB2E1_HUMAN	Ubiquitin-conjugating enzyme E2 E1	UBE2E1	0	0	0	0	0	0	0	0	11367000	0	0	0
P51970	NDUA8_HUMAN	NADH dehydrogenase [ubiquinone] 1 alpha subcomplex subunit 8	NDUFA8	102450000	134310000	91264000	101680000	64625000	93055000	99842000	78248000	72110000	0	70081000	0
P51991	ROA3_HUMAN	Heterogeneous nuclear ribonucleoprotein A3	HNRNPA3	1376300000	1683100000	1893100000	1909400000	1552000000	1547000000	2028300000	1864500000	0	0	25547000	6005000
P52209	6PGD_HUMAN	6-phosphogluconate dehydrogenase, decarboxylating	PGD	1459500000	1741100000	2610900000	2251500000	1945400000	1863500000	2915700000	1691800000	341710000	111420000	526020000	212750000
P52272	HNRPM_HUMAN	Heterogeneous nuclear ribonucleoprotein M	HNRNPM	3419400000	3228700000	4254500000	3608800000	3325000000	3255200000	3516100000	3530200000	1266000000	1164200000	1369500000	1150300000
P52292	IMA1_HUMAN	Importin subunit alpha-1	KPNA2	1588100000	1247000000	1763100000	1731400000	1075100000	1024900000	1079000000	1094600000	15566000	0	60186000	0
P52298	NCBP2_HUMAN	Nuclear cap-binding protein subunit 2	NCBP2	24053000	31282000	0	0	22775000	27700000	44138000	30352000	0	0	0	0
P52306	GDS1_HUMAN	Rap1 GTPase-GDP dissociation stimulator 1	RAP1GDS1	32976000	26575000	29799000	28715000	32891000	29669000	44487000	46337000	0	0	0	0
P52434	RPAB3_HUMAN	DNA-directed RNA polymerases I, II, and III subunit RPABC3	POLR2H	83669000	75436000	123830000	147700000	87415000	74624000	109160000	115740000	0	0	0	0
P52564	MP2K6_HUMAN	Dual specificity mitogen-activated protein kinase kinase 6	MAP2K6	0	0	0	0	0	9472600	0	0	0	0	0	0
P52565	GDIR1_HUMAN	Rho GDP-dissociation inhibitor 1	ARHGDIA	214280000	138270000	341850000	311780000	277480000	294200000	422150000	356180000	92989000	80068000	90397000	82446000
P52594	AGFG1_HUMAN	Arf-GAP domain and FG repeat-containing protein 1	AGFG1	74691000	0	72050000	64495000	97432000	74711000	75867000	76025000	72445000	0	59264000	0
P52597	HNRPF_HUMAN	Heterogeneous nuclear ribonucleoprotein F	HNRNPF	551720000	834960000	794120000	676310000	507510000	511660000	755200000	728470000	128020000	130390000	132020000	113440000
P52630	STAT2_HUMAN	Signal transducer and activator of transcription 2	STAT2	0	0	0	21733000	0	18855000	10852000	0	0	0	0	0
P52701	MSH6_HUMAN	DNA mismatch repair protein Msh6	MSH6	430910000	247440000	697270000	843460000	206260000	171300000	314160000	449690000	77185000	28456000	31704000	42498000
P52735	VAV2_HUMAN	Guanine nucleotide exchange factor VAV2	VAV2	0	0	0	0	0	0	0	0	34352000	0	31254000	0
P52756	RBM5_HUMAN	RNA-binding protein 5	RBM5	0	0	0	11615000	13049000	0	0	10148000	0	0	0	0
P52758	RIDA_HUMAN	2-iminobutanoate/2-iminopropanoate deaminase	RIDA	0	0	12807000	15493000	19403000	14804000	14557000	13853000	0	0	0	0
P52788	SPSY_HUMAN	Spermine synthase	SMS	195420000	175510000	157390000	162250000	435160000	398730000	469360000	379920000	0	0	0	0
P52789	HXK2_HUMAN	Hexokinase-2	HK2	219550000	248200000	252930000	265470000	202770000	302140000	329570000	301640000	0	0	23894000	0
P52848	NDST1_HUMAN	Bifunctional heparan sulfate N-deacetylase/N-sulfotransferase 1	NDST1	0	0	0	0	0	0	0	0	35884000	32015000	38709000	31175000
P52888	THOP1_HUMAN	Thimet oligopeptidase	THOP1	70673000	81809000	96261000	129450000	78556000	74082000	97981000	90873000	57627000	0	69757000	25272000
P52907	CAZA1_HUMAN	F-actin-capping protein subunit alpha-1	CAPZA1	445520000	277170000	496340000	597190000	445060000	406760000	622890000	299970000	136900000	146190000	270570000	150050000
P52926	HMGA2_HUMAN	High mobility group protein HMGI-C	HMGA2	252350000	225200000	182270000	162920000	332450000	286350000	211450000	182600000	29529000	0	0	0
P52943	CRIP2_HUMAN	Cysteine-rich protein 2	CRIP2	0	0	0	0	0	0	0	0	137920000	195060000	198040000	143880000
P52948	NUP98_HUMAN	Nuclear pore complex protein Nup98-Nup96	NUP98	136060000	110700000	138170000	185260000	126850000	113460000	193800000	151450000	70013000	47479000	48524000	46926000
P53004	BIEA_HUMAN	Biliverdin reductase A	BLVRA	69132000	51731000	62784000	64091000	113720000	100690000	128220000	123340000	0	0	0	0
P53007	TXTP_HUMAN	Tricarboxylate transport protein, mitochondrial	SLC25A1	124460000	149220000	116550000	126690000	138290000	139330000	94628000	121310000	182860000	152580000	212410000	263360000
P53041	PPP5_HUMAN	Serine/threonine-protein phosphatase 5	PPP5C	74677000	61357000	74521000	101970000	74290000	73490000	108020000	111990000	0	0	0	0
P53350	PLK1_HUMAN	Serine/threonine-protein kinase PLK1	PLK1	49751000	46547000	62977000	73899000	64866000	64882000	53423000	64151000	0	0	0	0
P53355	DAPK1_HUMAN	Death-associated protein kinase 1	DAPK1	0	0	0	8715700	0	0	0	0	0	0	0	0
P53365	ARFP2_HUMAN	Arfaptin-2	ARFIP2	46874000	46216000	39865000	49160000	28478000	30937000	34998000	31682000	0	0	0	0
P53367	ARFP1_HUMAN	Arfaptin-1	ARFIP1	90368000	60668000	77878000	74820000	49951000	40106000	43238000	38331000	0	0	0	0
P53384	NUBP1_HUMAN	Cytosolic Fe-S cluster assembly factor NUBP1	NUBP1	22642000	19299000	14971000	24795000	24770000	22657000	24807000	24566000	0	0	0	0
P53396	ACLY_HUMAN	ATP-citrate synthase	ACLY	2420100000	2867700000	2551500000	2432300000	2383300000	2514900000	2679300000	2801900000	4299300000	3897800000	5611800000	3283400000
P53582	MAP11_HUMAN	Methionine aminopeptidase 1	METAP1	142640000	138800000	115860000	146650000	103760000	103600000	124160000	132440000	49691000	0	65993000	0
P53597	SUCA_HUMAN	Succinate--CoA ligase [ADP/GDP-forming] subunit alpha, mitochondrial	SUCLG1	86333000	85462000	72381000	115350000	124610000	99286000	239180000	261030000	396780000	278690000	358910000	283120000
P53602	MVD1_HUMAN	Diphosphomevalonate decarboxylase	MVD	115620000	114940000	103150000	102770000	59257000	58220000	52970000	62893000	0	0	0	0
P53611	PGTB2_HUMAN	Geranylgeranyl transferase type-2 subunit beta	RABGGTB	0	0	10688000	13365000	16936000	0	24866000	0	0	0	0	0
P53618	COPB_HUMAN	Coatomer subunit beta	COPB1	429680000	301020000	530120000	496020000	373510000	346870000	361530000	362350000	927210000	657100000	954910000	800080000
P53621	COPA_HUMAN	Coatomer subunit alpha	COPA	934390000	848190000	864860000	986730000	680060000	907500000	1012000000	931330000	4672600000	4553600000	4217700000	4538700000
P53634	CATC_HUMAN	Dipeptidyl peptidase 1	CTSC	239720000	249990000	277050000	368770000	314650000	227770000	334690000	257900000	96808000	182390000	107020000	127100000
P53701	CCHL_HUMAN	Holocytochrome c-type synthase	HCCS	12122000	0	25727000	66800000	43390000	0	41349000	50077000	57812000	35737000	106770000	40430000
P53801	PTTG_HUMAN	Pituitary tumor-transforming gene 1 protein-interacting protein	PTTG1IP	0	0	0	0	0	0	0	0	198980000	429800000	219050000	167270000
P53985	MOT1_HUMAN	Monocarboxylate transporter 1	SLC16A1	582690000	559600000	652440000	784800000	474450000	436240000	506350000	515770000	1644700000	441790000	1540500000	1421700000
P53990	IST1_HUMAN	IST1 homolog	IST1	204680000	196880000	166400000	113070000	171090000	128320000	181290000	126010000	0	0	0	0
P53992	SC24C_HUMAN	Protein transport protein Sec24C	SEC24C	73330000	94576000	78602000	70062000	110810000	92053000	108770000	86967000	423130000	275140000	294880000	127030000
P53999	TCP4_HUMAN	Activated RNA polymerase II transcriptional coactivator p15	SUB1	352050000	285870000	438840000	322000000	280960000	269330000	320960000	267480000	0	0	0	0
P54105	ICLN_HUMAN	Methylosome subunit pICln	CLNS1A	26548000	20726000	33128000	30415000	18038000	18754000	27875000	23871000	0	0	0	0
P54136	SYRC_HUMAN	Arginine--tRNA ligase, cytoplasmic	RARS1	616960000	620900000	631030000	650600000	546190000	491600000	616970000	484190000	713900000	629710000	786480000	594520000
P54274	TERF1_HUMAN	Telomeric repeat-binding factor 1	TERF1	0	0	0	12341000	0	0	0	0	0	0	0	0
P54277	PMS1_HUMAN	PMS1 protein homolog 1	PMS1	10178000	0	18024000	13737000	10763000	0	8976600	9890900	0	0	0	0
P54289	CA2D1_HUMAN	Voltage-dependent calcium channel subunit alpha-2/delta-1	CACNA2D1	10568000	13639000	15609000	13690000	18169000	34354000	25027000	25265000	221250000	75860000	225830000	57237000
P54577	SYYC_HUMAN	Tyrosine--tRNA ligase, cytoplasmic	YARS1	1539000000	694520000	967960000	1621300000	1229600000	867290000	1069200000	1078800000	28777000	0	37209000	0
P54578	UBP14_HUMAN	Ubiquitin carboxyl-terminal hydrolase 14	USP14	331400000	261840000	734050000	823200000	270850000	257010000	530570000	435640000	0	21582000	0	24565000
P54619	AAKG1_HUMAN	5'-AMP-activated protein kinase subunit gamma-1	PRKAG1	20569000	21997000	25971000	18268000	17229000	14686000	18839000	14124000	16201000	0	16699000	0
P54652	HSP72_HUMAN	Heat shock-related 70 kDa protein 2	HSPA2	132990000	195030000	232980000	237150000	91992000	149410000	167140000	174400000	0	0	0	0
P54687	BCAT1_HUMAN	Branched-chain-amino-acid aminotransferase, cytosolic	BCAT1	121180000	98921000	151680000	142650000	143920000	143970000	145020000	192190000	62135000	68825000	25459000	98015000
P54709	AT1B3_HUMAN	Sodium/potassium-transporting ATPase subunit beta-3	ATP1B3	174940000	219010000	264170000	240410000	158570000	181720000	166900000	144590000	555930000	797450000	576640000	693140000
P54725	RD23A_HUMAN	UV excision repair protein RAD23 homolog A	RAD23A	0	0	0	0	13405000	0	0	0	0	0	0	0
P54727	RD23B_HUMAN	UV excision repair protein RAD23 homolog B	RAD23B	334980000	292200000	342980000	346350000	290280000	297130000	320190000	419100000	0	0	0	0
P54760	EPHB4_HUMAN	Ephrin type-B receptor 4	EPHB4	28566000	22997000	21785000	27794000	13060000	12729000	12126000	10940000	556360000	63788000	919500000	124210000
P54764	EPHA4_HUMAN	Ephrin type-A receptor 4	EPHA4	0	0	0	0	0	0	0	0	16557000	0	0	0
P54802	ANAG_HUMAN	Alpha-N-acetylglucosaminidase	NAGLU	0	0	0	0	0	10352000	0	0	0	0	0	0
P54819	KAD2_HUMAN	Adenylate kinase 2, mitochondrial	AK2	113990000	102170000	105560000	105740000	52982000	49776000	47680000	51151000	0	0	10275000	0
P54886	P5CS_HUMAN	Delta-1-pyrroline-5-carboxylate synthase	ALDH18A1	602780000	535850000	853090000	745760000	460290000	462660000	542250000	495830000	464200000	436260000	481610000	489090000
P54920	SNAA_HUMAN	Alpha-soluble NSF attachment protein	NAPA	145950000	145960000	118030000	137290000	131600000	128220000	180650000	205080000	67249000	78726000	75767000	106280000
P55010	IF5_HUMAN	Eukaryotic translation initiation factor 5	EIF5	197120000	173850000	144340000	196190000	127440000	144200000	150600000	192370000	62817000	0	94041000	0
P55011	S12A2_HUMAN	Solute carrier family 12 member 2	SLC12A2	10023000	6047700	0	0	0	11432000	0	0	112270000	133840000	205910000	124190000
P55036	PSMD4_HUMAN	26S proteasome non-ATPase regulatory subunit 4	PSMD4	290690000	354830000	400140000	579550000	304710000	370790000	380410000	428640000	0	0	0	0
P55039	DRG2_HUMAN	Developmentally-regulated GTP-binding protein 2	DRG2	25312000	28486000	29206000	26628000	29053000	27817000	24935000	20814000	0	0	0	0
P55060	XPO2_HUMAN	Exportin-2	CSE1L	4239200000	5302400000	5916800000	4245300000	3828800000	3399600000	3553400000	3572200000	1128700000	1130800000	1318600000	869520000
P55061	BI1_HUMAN	Bax inhibitor 1	TMBIM6	53595000	0	59626000	48770000	25368000	59102000	54476000	45932000	173160000	50301000	121290000	111980000
P55072	TERA_HUMAN	Transitional endoplasmic reticulum ATPase	VCP	4001700000	2930900000	3602900000	3107500000	3426700000	3630400000	3185700000	3137500000	1621900000	1358400000	1755200000	1366800000
P55081	MFAP1_HUMAN	Microfibrillar-associated protein 1	MFAP1	37534000	36584000	51511000	53793000	38505000	36872000	54083000	42978000	0	0	0	0
P55084	ECHB_HUMAN	Trifunctional enzyme subunit beta, mitochondrial	HADHB	207270000	135810000	219650000	212840000	329720000	185390000	254000000	205320000	2730300000	2003900000	2962200000	2697100000
P55145	MANF_HUMAN	Mesencephalic astrocyte-derived neurotrophic factor	MANF	182770000	173740000	180510000	214190000	123710000	130000000	189060000	170510000	0	0	0	0
P55196	AFAD_HUMAN	Afadin	AFDN	133730000	98664000	170480000	186090000	144680000	110330000	195080000	202330000	96590000	20398000	83625000	35577000
P55209	NP1L1_HUMAN	Nucleosome assembly protein 1-like 1	NAP1L1	1011800000	807950000	1063300000	981750000	618010000	833060000	908200000	926040000	0	0	21481000	0
P55263	ADK_HUMAN	Adenosine kinase	ADK	57943000	45703000	54120000	60875000	50132000	51146000	62911000	55951000	0	0	0	0
P55265	DSRAD_HUMAN	Double-stranded RNA-specific adenosine deaminase	ADAR	256960000	246530000	335520000	242720000	285060000	236610000	342240000	318610000	25179000	0	40749000	0
P55268	LAMB2_HUMAN	Laminin subunit beta-2	LAMB2	54347000	0	45566000	35301000	54032000	48853000	27208000	31443000	13246000	0	20067000	0
P55287	CAD11_HUMAN	Cadherin-11	CDH11	0	0	0	0	0	0	0	0	51931000	59695000	73091000	0
P55290	CAD13_HUMAN	Cadherin-13	CDH13	0	0	0	0	11592000	10048000	10717000	14235000	0	0	0	0
P55735	SEC13_HUMAN	Protein SEC13 homolog	SEC13	70050000	94673000	98844000	99566000	95639000	87393000	95130000	96282000	126310000	186910000	137520000	117140000
P55769	NH2L1_HUMAN	NHP2-like protein 1	SNU13	353550000	208390000	267830000	292420000	208120000	205900000	259790000	227100000	0	0	0	0
P55786	PSA_HUMAN	Puromycin-sensitive aminopeptidase	NPEPPS	619920000	582550000	854330000	866090000	603250000	363850000	815440000	718320000	883250000	555250000	809970000	658540000
P55795	HNRH2_HUMAN	Heterogeneous nuclear ribonucleoprotein H2	HNRNPH2	119890000	73866000	154150000	129890000	106290000	111250000	113420000	133220000	0	21864000	0	0
P55809	SCOT1_HUMAN	Succinyl-CoA:3-ketoacid coenzyme A transferase 1, mitochondrial	OXCT1	180000000	178600000	133660000	143080000	208890000	141100000	160860000	215360000	165900000	164840000	239940000	218320000
P55884	EIF3B_HUMAN	Eukaryotic translation initiation factor 3 subunit B	EIF3B	791150000	857560000	1036900000	1028500000	800800000	737980000	939520000	823950000	245120000	266320000	357130000	290810000
P55899	FCGRN_HUMAN	IgG receptor FcRn large subunit p51	FCGRT	0	0	0	0	0	0	0	0	15920000	0	11537000	15027000
P56134	ATPK_HUMAN	ATP synthase subunit f, mitochondrial	ATP5MF	0	0	0	0	0	0	0	0	209140000	222300000	302150000	0
P56182	RRP1_HUMAN	Ribosomal RNA processing protein 1 homolog A	RRP1	58189000	48782000	45287000	48915000	47273000	38621000	50432000	53277000	0	0	0	0
P56192	SYMC_HUMAN	Methionine--tRNA ligase, cytoplasmic	MARS1	389580000	431430000	478260000	558220000	346290000	383300000	435840000	450410000	365160000	363680000	422400000	225830000
P56211	ARP19_HUMAN	cAMP-regulated phosphoprotein 19	ARPP19	25998000	22234000	26508000	28779000	21581000	0	25859000	0	0	0	0	0
P56270	MAZ_HUMAN	Myc-associated zinc finger protein	MAZ	37900000	37052000	18731000	31496000	9608200	24925000	26737000	31114000	0	0	0	0
P56381	ATP5E_HUMAN	ATP synthase subunit epsilon, mitochondrial	ATP5F1E	0	0	0	0	0	0	0	0	0	0	285760000	0
P56385	ATP5I_HUMAN	ATP synthase subunit e, mitochondrial	ATP5ME	113490000	97263000	116120000	109060000	135070000	113190000	118610000	120650000	64027000	70726000	52682000	79801000
P56537	IF6_HUMAN	Eukaryotic translation initiation factor 6	EIF6	176670000	175000000	210820000	212570000	198440000	187890000	202000000	232380000	53298000	100040000	89876000	41285000
P56545	CTBP2_HUMAN	C-terminal-binding protein 2	CTBP2	184700000	173710000	196200000	166540000	149260000	160510000	171650000	171410000	0	0	0	0
P56556	NDUA6_HUMAN	NADH dehydrogenase [ubiquinone] 1 alpha subcomplex subunit 6	NDUFA6	118010000	96065000	114270000	104130000	28965000	80037000	62335000	105190000	121560000	0	0	0
P56589	PEX3_HUMAN	Peroxisomal biogenesis factor 3	PEX3	0	0	0	0	0	0	0	0	74416000	0	0	0
P56747	CLD6_HUMAN	Claudin-6	CLDN6	417720000	397230000	310970000	437190000	500780000	420900000	393890000	276260000	0	0	0	0
P56937	DHB7_HUMAN	3-keto-steroid reductase/17-beta-hydroxysteroid dehydrogenase 7	HSD17B7	30511000	64467000	26932000	34972000	0	0	34235000	38621000	0	0	0	0
P56945	BCAR1_HUMAN	Breast cancer anti-estrogen resistance protein 1	BCAR1	27102000	35250000	20281000	19618000	51198000	36214000	35416000	27813000	0	0	0	0
P57076	CF298_HUMAN	Cilia- and flagella-associated protein 298	CFAP298	26410000	24219000	37882000	46210000	27419000	20885000	25664000	41564000	0	0	0	0
P57081	WDR4_HUMAN	tRNA (guanine-N(7)-)-methyltransferase non-catalytic subunit WDR4	WDR4	0	0	0	6839900	0	0	0	6349800	0	0	0	0
P57088	TMM33_HUMAN	Transmembrane protein 33	TMEM33	234790000	280480000	157550000	206610000	147380000	144380000	112550000	158400000	322530000	279860000	322620000	375970000
P57105	SYJ2B_HUMAN	Synaptojanin-2-binding protein	SYNJ2BP	25512000	19876000	0	0	21669000	0	0	0	0	0	0	0
P57678	GEMI4_HUMAN	Gem-associated protein 4	GEMIN4	34752000	29342000	48937000	32788000	33105000	27970000	25901000	22177000	0	0	0	0
P57735	RAB25_HUMAN	Ras-related protein Rab-25	RAB25	0	0	0	0	0	0	15620000	0	0	0	0	0
P57740	NU107_HUMAN	Nuclear pore complex protein Nup107	NUP107	105130000	95189000	131100000	133580000	96564000	152900000	138840000	118710000	50761000	0	31826000	48095000
P57764	GSDMD_HUMAN	Gasdermin-D	GSDMD	0	0	0	0	0	0	0	0	0	0	6011500	0
P58107	EPIPL_HUMAN	Epiplakin	EPPK1	116080000	112080000	114290000	100610000	240870000	285730000	459600000	461250000	0	0	0	0
P59998	ARPC4_HUMAN	Actin-related protein 2/3 complex subunit 4	ARPC4	333170000	361020000	268040000	283530000	366690000	325320000	355400000	340560000	150740000	167100000	177020000	115340000
P60002	ELOF1_HUMAN	Transcription elongation factor 1 homolog	ELOF1	0	0	0	0	0	0	0	5659400	0	0	0	0
P60033	CD81_HUMAN	CD81 antigen	CD81	0	0	0	0	0	0	0	0	134560000	0	119210000	112740000
P60059	SC61G_HUMAN	Protein transport protein Sec61 subunit gamma	SEC61G	0	0	28563000	27230000	71534000	60217000	35335000	41018000	48835000	0	0	0
P60174	TPIS_HUMAN	Triosephosphate isomerase	TPI1	2452200000	2450300000	2020300000	2402800000	2532100000	2621300000	3185400000	3912000000	348750000	409220000	234880000	261420000
P60228	EIF3E_HUMAN	Eukaryotic translation initiation factor 3 subunit E	EIF3E	602970000	654150000	605840000	565950000	503320000	515460000	637530000	760400000	172320000	173890000	224880000	156040000
P60468	SC61B_HUMAN	Protein transport protein Sec61 subunit beta	SEC61B	155190000	121050000	100240000	88655000	0	0	109880000	142850000	960320000	156280000	1410500000	166620000
P60510	PP4C_HUMAN	Serine/threonine-protein phosphatase 4 catalytic subunit	PPP4C	57319000	35333000	46350000	33679000	31125000	23708000	24718000	32640000	0	0	0	0
P60520	GBRL2_HUMAN	Gamma-aminobutyric acid receptor-associated protein-like 2	GABARAPL2	24564000	16403000	31064000	26300000	21751000	22317000	17877000	20948000	0	0	0	0
P60602	ROMO1_HUMAN	Reactive oxygen species modulator 1	ROMO1	0	16110000	35032000	30462000	12382000	14916000	11645000	11348000	0	0	0	0
P60660	MYL6_HUMAN	Myosin light polypeptide 6	MYL6	224490000	213690000	245470000	171300000	226280000	262380000	300130000	284650000	293770000	236620000	241080000	342770000
P60709	ACTB_HUMAN	Actin, cytoplasmic 1	ACTB	0	121570000	221950000	192690000	349260000	374380000	593920000	249920000	1028500000	1628900000	58508000	286400000
P60763	RAC3_HUMAN	Ras-related C3 botulinum toxin substrate 3	RAC3	0	0	17827000	16077000	0	13371000	27996000	0	52591000	0	0	0
P60842	IF4A1_HUMAN	Eukaryotic initiation factor 4A-I	EIF4A1	4151100000	4990400000	5349200000	5443400000	4971600000	4345300000	5252600000	5425100000	1235600000	1089600000	1123800000	1119500000
P60866	RS20_HUMAN	40S ribosomal protein S20	RPS20	1356000000	1390500000	1471200000	1601900000	1283900000	1374200000	1527900000	1412100000	495060000	514710000	491260000	540430000
P60891	PRPS1_HUMAN	Ribose-phosphate pyrophosphokinase 1	PRPS1	156920000	162160000	169490000	167770000	142840000	120380000	154160000	217380000	0	0	0	0
P60900	PSA6_HUMAN	Proteasome subunit alpha type-6	PSMA6	593350000	589450000	505750000	630800000	647760000	541830000	634600000	652710000	512690000	445020000	471630000	421300000
P60903	S10AA_HUMAN	Protein S100-A10	S100A10	0	120140000	32605000	26625000	104350000	113780000	96333000	104750000	0	0	0	0
P60953	CDC42_HUMAN	Cell division control protein 42 homolog	CDC42	148650000	148050000	97974000	148050000	130640000	133940000	197180000	186960000	789070000	752560000	1060100000	786910000
P60981	DEST_HUMAN	Destrin	DSTN	187520000	149380000	167200000	236290000	120860000	179410000	319430000	326720000	200300000	285410000	187010000	249150000
P60983	GMFB_HUMAN	Glia maturation factor beta	GMFB	154360000	132520000	167970000	180820000	188160000	145380000	176640000	137470000	0	0	0	0
P61006	RAB8A_HUMAN	Ras-related protein Rab-8A	RAB8A	41573000	0	44812000	44486000	70344000	62786000	44816000	48224000	111500000	96356000	70984000	72849000
P61009	SPCS3_HUMAN	Signal peptidase complex subunit 3	SPCS3	351010000	0	278150000	268420000	0	0	0	0	531740000	391670000	453770000	565700000
P61011	SRP54_HUMAN	Signal recognition particle 54 kDa protein	SRP54	119870000	112860000	173230000	112080000	109500000	117780000	137150000	125460000	91044000	50029000	68292000	74976000
P61018	RAB4B_HUMAN	Ras-related protein Rab-4B	RAB4B	0	0	0	0	0	0	0	0	24239000	0	27931000	27427000
P61019	RAB2A_HUMAN	Ras-related protein Rab-2A	RAB2A	251370000	221100000	222380000	259510000	249990000	249550000	238430000	252860000	897820000	665600000	615740000	867040000
P61020	RAB5B_HUMAN	Ras-related protein Rab-5B	RAB5B	18765000	0	15431000	14706000	25736000	24377000	21798000	23193000	44524000	65176000	23385000	35132000
P61024	CKS1_HUMAN	Cyclin-dependent kinases regulatory subunit 1	CKS1B	0	42160000	0	48548000	0	30122000	52780000	49782000	0	0	0	0
P61026	RAB10_HUMAN	Ras-related protein Rab-10	RAB10	63739000	150500000	126920000	176890000	124720000	65779000	73332000	64473000	237150000	151650000	206910000	241900000
P61077	UB2D3_HUMAN	Ubiquitin-conjugating enzyme E2 D3	UBE2D3	0	0	0	0	0	0	0	49799000	0	0	0	0
P61081	UBC12_HUMAN	NEDD8-conjugating enzyme Ubc12	UBE2M	137450000	93350000	107680000	134250000	156890000	172290000	178520000	118240000	127010000	0	105480000	0
P61086	UBE2K_HUMAN	Ubiquitin-conjugating enzyme E2 K	UBE2K	356990000	376190000	442440000	378870000	134960000	233600000	222360000	268570000	0	0	0	0
P61088	UBE2N_HUMAN	Ubiquitin-conjugating enzyme E2 N	UBE2N	553410000	457550000	454310000	527480000	317760000	327860000	407650000	343150000	0	0	0	0
P61106	RAB14_HUMAN	Ras-related protein Rab-14	RAB14	135200000	96438000	182470000	135070000	112610000	133950000	172260000	120450000	668960000	602660000	737280000	633250000
P61158	ARP3_HUMAN	Actin-related protein 3	ACTR3	230660000	179200000	295580000	450390000	305260000	383460000	407260000	318030000	210780000	236960000	219370000	120670000
P61160	ARP2_HUMAN	Actin-related protein 2	ACTR2	369370000	286260000	465480000	357170000	314750000	321960000	479880000	393850000	398180000	367190000	681570000	253210000
P61163	ACTZ_HUMAN	Alpha-centractin	ACTR1A	122770000	109020000	230350000	186790000	201670000	180260000	191830000	161480000	496520000	531090000	288720000	407330000
P61165	TM258_HUMAN	Transmembrane protein 258	TMEM258	0	0	0	0	0	0	0	0	135270000	95034000	201800000	114600000
P61201	CSN2_HUMAN	COP9 signalosome complex subunit 2	COPS2	137580000	138120000	154650000	132860000	121490000	121110000	138910000	129570000	0	0	0	0
P84077	ARF1_HUMAN	ADP-ribosylation factor 1	ARF1	247390000	242720000	265060000	244860000	250670000	204080000	186080000	122530000	86672000	65576000	0	117900000
P61221	ABCE1_HUMAN	ATP-binding cassette sub-family E member 1	ABCE1	385800000	290980000	397970000	405960000	289810000	342980000	320060000	349130000	627600000	660450000	753870000	825470000
P61224	RAP1B_HUMAN	Ras-related protein Rap-1b	RAP1B	301300000	233320000	342970000	287540000	288650000	264270000	238520000	223050000	1338100000	822800000	1213500000	1238700000
P61225	RAP2B_HUMAN	Ras-related protein Rap-2b	RAP2B	28925000	0	45369000	43773000	113190000	0	49935000	0	134830000	106350000	106320000	145320000
P61247	RS3A_HUMAN	40S ribosomal protein S3a	RPS3A	4037800000	4012700000	3934800000	4415300000	3780500000	3995400000	4672700000	5015800000	1410200000	1197900000	1552000000	1236300000
P61254	RL26_HUMAN	60S ribosomal protein L26	RPL26	977570000	1559000000	779430000	970680000	931230000	1083800000	1070700000	1023100000	1668200000	1425100000	2005400000	2164200000
P61289	PSME3_HUMAN	Proteasome activator complex subunit 3	PSME3	362770000	359170000	518960000	451110000	309800000	366450000	498280000	372620000	0	0	0	0
P61313	RL15_HUMAN	60S ribosomal protein L15	RPL15	1193800000	789350000	1179900000	1321000000	986640000	909900000	1393200000	1404600000	5151000000	4386700000	5873400000	6916100000
P61353	RL27_HUMAN	60S ribosomal protein L27	RPL27	2147600000	1920500000	2291200000	2373300000	2017000000	2165800000	2166800000	2253700000	2938500000	3628500000	2784600000	3272500000
P61421	VA0D1_HUMAN	V-type proton ATPase subunit d 1	ATP6V0D1	0	42531000	0	0	0	0	0	0	98911000	125420000	83065000	142850000
P61513	RL37A_HUMAN	60S ribosomal protein L37a	RPL37A	129710000	152930000	127250000	280920000	96104000	190440000	212360000	173810000	310410000	360060000	440560000	326890000
P61586	RHOA_HUMAN	Transforming protein RhoA	RHOA	435860000	462480000	329170000	518490000	556000000	495520000	618010000	613750000	610810000	781890000	630040000	620960000
P61604	CH10_HUMAN	10 kDa heat shock protein, mitochondrial	HSPE1	2252300000	1695700000	2048700000	2302800000	2017700000	2146500000	2298000000	2337500000	398710000	504900000	384290000	326220000
P61619	S61A1_HUMAN	Protein transport protein Sec61 subunit alpha isoform 1	SEC61A1	465520000	544140000	371210000	423230000	349650000	387200000	392280000	366820000	2404800000	349050000	3620500000	587300000
P61758	PFD3_HUMAN	Prefoldin subunit 3	VBP1	58731000	0	69159000	0	0	0	28937000	58936000	0	0	0	0
P61764	STXB1_HUMAN	Syntaxin-binding protein 1	STXBP1	75605000	61488000	47634000	47049000	0	54940000	41684000	64255000	125860000	155030000	109810000	224000000
P61803	DAD1_HUMAN	Dolichyl-diphosphooligosaccharide--protein glycosyltransferase subunit DAD1	DAD1	45806000	0	72716000	109010000	53457000	35373000	55447000	37045000	265940000	248950000	232960000	304060000
P61812	TGFB2_HUMAN	Transforming growth factor beta-2 proprotein	TGFB2	0	0	0	0	0	0	0	0	37269000	0	50170000	0
P61916	NPC2_HUMAN	NPC intracellular cholesterol transporter 2	NPC2	91466000	67589000	37955000	65667000	65151000	74374000	68899000	76442000	55617000	0	0	0
P61923	COPZ1_HUMAN	Coatomer subunit zeta-1	COPZ1	41579000	0	46392000	79793000	29213000	27799000	46286000	51447000	0	0	0	0
P61960	UFM1_HUMAN	Ubiquitin-fold modifier 1	UFM1	31114000	0	0	0	0	29364000	35336000	0	0	0	0	0
P61962	DCAF7_HUMAN	DDB1- and CUL4-associated factor 7	DCAF7	52438000	0	46177000	49077000	46142000	52230000	51278000	45126000	0	0	0	0
P61964	WDR5_HUMAN	WD repeat-containing protein 5	WDR5	111600000	90159000	133450000	131350000	91650000	85602000	124680000	119060000	74110000	42524000	58887000	38870000
P61966	AP1S1_HUMAN	AP-1 complex subunit sigma-1A	AP1S1	0	0	0	0	0	0	0	0	21448000	0	0	0
P61970	NTF2_HUMAN	Nuclear transport factor 2	NUTF2	40217000	0	27308000	52736000	27130000	30117000	35485000	30417000	0	0	0	0
P61978	HNRPK_HUMAN	Heterogeneous nuclear ribonucleoprotein K	HNRNPK	4894300000	4815100000	4945500000	4722000000	3767300000	3875100000	3887300000	3654600000	212250000	181130000	298830000	152180000
P61981	1433G_HUMAN	14-3-3 protein gamma	YWHAG	843950000	574000000	864220000	727030000	275680000	504450000	649210000	945680000	0	234440000	458450000	237200000
P62070	RRAS2_HUMAN	Ras-related protein R-Ras2	RRAS2	206040000	185750000	290650000	243210000	284010000	238240000	261730000	254280000	1722900000	682810000	1882600000	935520000
P62081	RS7_HUMAN	40S ribosomal protein S7	RPS7	2571300000	2587300000	2562900000	2096100000	1380600000	1903300000	1362800000	2404400000	996730000	0	858260000	133300000
P62136	PP1A_HUMAN	Serine/threonine-protein phosphatase PP1-alpha catalytic subunit	PPP1CA	34437000	154540000	77700000	194860000	0	66950000	102800000	47470000	46992000	147840000	342890000	0
P62140	PP1B_HUMAN	Serine/threonine-protein phosphatase PP1-beta catalytic subunit	PPP1CB	252560000	277110000	219890000	272620000	295370000	271660000	385510000	324600000	366210000	275380000	223170000	289110000
P62191	PRS4_HUMAN	26S proteasome regulatory subunit 4	PSMC1	435090000	410010000	446320000	326090000	371760000	319810000	446550000	424820000	1001900000	878140000	1175800000	1005300000
P62195	PRS8_HUMAN	26S proteasome regulatory subunit 8	PSMC5	376870000	376040000	552580000	438790000	363000000	518130000	487140000	532030000	638200000	278620000	756690000	426220000
P62241	RS8_HUMAN	40S ribosomal protein S8	RPS8	2297100000	1919300000	2905800000	1689200000	1702000000	1636100000	1652500000	1924400000	3205900000	2621200000	2333100000	2521600000
P62244	RS15A_HUMAN	40S ribosomal protein S15a	RPS15A	1793700000	1565000000	1468100000	1926700000	1492500000	1413000000	1357100000	1445600000	401330000	463060000	356220000	441100000
P62249	RS16_HUMAN	40S ribosomal protein S16	RPS16	3449900000	4057400000	3580300000	3766900000	3925500000	3225200000	3329300000	2893000000	3339000000	3302400000	3624900000	3592200000
P62253	UB2G1_HUMAN	Ubiquitin-conjugating enzyme E2 G1	UBE2G1	26536000	25522000	26027000	27196000	25306000	19014000	22485000	0	0	0	0	0
P62256	UBE2H_HUMAN	Ubiquitin-conjugating enzyme E2 H	UBE2H	0	0	0	0	0	0	0	16131000	0	0	0	0
P62258	1433E_HUMAN	14-3-3 protein epsilon	YWHAE	3481100000	3249900000	2734200000	2748100000	2375900000	2820700000	3518400000	4438600000	53461000	89959000	205290000	0
P62263	RS14_HUMAN	40S ribosomal protein S14	RPS14	915570000	1296600000	1063900000	1271500000	1169300000	1123100000	1212900000	1344300000	1235500000	1258300000	1436900000	1279300000
P62266	RS23_HUMAN	40S ribosomal protein S23	RPS23	334480000	379590000	302500000	478840000	308060000	349640000	573070000	322790000	308090000	189390000	315630000	157770000
P62269	RS18_HUMAN	40S ribosomal protein S18	RPS18	2509000000	3644700000	2711300000	2619100000	1996300000	2540200000	2520600000	3214600000	2236200000	2205400000	3121900000	2561000000
P62273	RS29_HUMAN	40S ribosomal protein S29	RPS29	50956000	0	0	0	0	0	0	0	126310000	0	122210000	0
P62277	RS13_HUMAN	40S ribosomal protein S13	RPS13	2465500000	2180100000	2548000000	2634800000	2235500000	2137200000	2460000000	2214300000	1109700000	1045100000	869770000	1327900000
P62280	RS11_HUMAN	40S ribosomal protein S11	RPS11	2181500000	1998900000	2010300000	2660400000	1564500000	1564500000	2067900000	2159200000	3019800000	2907600000	3719600000	3154400000
P62304	RUXE_HUMAN	Small nuclear ribonucleoprotein E	SNRPE	156450000	116300000	223300000	170810000	108720000	69654000	196240000	151640000	0	0	0	0
P62306	RUXF_HUMAN	Small nuclear ribonucleoprotein F	SNRPF	211750000	55176000	230130000	243000000	82930000	68728000	257810000	210900000	0	0	0	0
P62310	LSM3_HUMAN	U6 snRNA-associated Sm-like protein LSm3	LSM3	0	0	22162000	19780000	18671000	18592000	0	22480000	0	0	0	0
P62312	LSM6_HUMAN	U6 snRNA-associated Sm-like protein LSm6	LSM6	123560000	137400000	114520000	198290000	163240000	147770000	176080000	200870000	0	0	0	0
P62314	SMD1_HUMAN	Small nuclear ribonucleoprotein Sm D1	SNRPD1	661470000	711840000	607750000	946790000	521670000	630780000	668790000	484430000	0	0	194570000	0
P62316	SMD2_HUMAN	Small nuclear ribonucleoprotein Sm D2	SNRPD2	676950000	532780000	456210000	562020000	588370000	515390000	570200000	498850000	145280000	0	76249000	0
P62318	SMD3_HUMAN	Small nuclear ribonucleoprotein Sm D3	SNRPD3	572460000	440970000	431330000	658700000	428790000	481840000	641120000	571490000	0	77377000	0	0
P62328	TYB4_HUMAN	Thymosin beta-4	TMSB4X	352750000	327360000	635720000	273370000	483480000	514000000	1060200000	673210000	0	0	0	0
P62330	ARF6_HUMAN	ADP-ribosylation factor 6	ARF6	104090000	61061000	56674000	56051000	69277000	52026000	55674000	40900000	86841000	0	98372000	82605000
P62333	PRS10_HUMAN	26S proteasome regulatory subunit 10B	PSMC6	462840000	455660000	527100000	528580000	482870000	419240000	558080000	519510000	650720000	709430000	599910000	461020000
P62341	SELT_HUMAN	Thioredoxin reductase-like selenoprotein T	SELENOT	12229000	19596000	22301000	0	13878000	13630000	21103000	12682000	52289000	39114000	49108000	51986000
P62380	TBPL1_HUMAN	TATA box-binding protein-like 1	TBPL1	0	0	0	0	0	0	0	33932000	0	0	0	0
P62424	RL7A_HUMAN	60S ribosomal protein L7a	RPL7A	3676300000	3241500000	3400700000	3745000000	2685000000	2700100000	3385900000	3829800000	5480000000	3368200000	5121200000	4564000000
P62487	RPB7_HUMAN	DNA-directed RNA polymerase II subunit RPB7	POLR2G	22787000	23450000	18733000	29794000	24923000	19490000	22026000	21923000	0	0	0	0
P62495	ERF1_HUMAN	Eukaryotic peptide chain release factor subunit 1	ETF1	398210000	183540000	460200000	500550000	189450000	298040000	253490000	269020000	35911000	0	39947000	0
P62633	CNBP_HUMAN	Cellular nucleic acid-binding protein	CNBP	51943000	237750000	45585000	97221000	44368000	38323000	107310000	95077000	0	0	0	0
P62701	RS4X_HUMAN	40S ribosomal protein S4, X isoform	RPS4X	2304200000	2699400000	2792200000	2955300000	2365400000	2232300000	2660800000	3115600000	1455200000	1453400000	1994800000	1528100000
P62714	PP2AB_HUMAN	Serine/threonine-protein phosphatase 2A catalytic subunit beta isoform	PPP2CB	128590000	107350000	100390000	131630000	123920000	107730000	147310000	119670000	131830000	77051000	136550000	0
P62745	RHOB_HUMAN	Rho-related GTP-binding protein RhoB	RHOB	0	0	0	0	0	0	0	0	96744000	93643000	109240000	0
P62750	RL23A_HUMAN	60S ribosomal protein L23a	RPL23A	1533300000	1177600000	1692000000	1351600000	906420000	868550000	1154900000	922310000	538970000	584550000	652460000	658960000
P62753	RS6_HUMAN	40S ribosomal protein S6	RPS6	2763800000	2473700000	2488700000	2834300000	2372800000	2242700000	2245400000	2477600000	2783000000	2731500000	2794800000	2862800000
P62760	VISL1_HUMAN	Visinin-like protein 1	VSNL1	242980000	176590000	133290000	136070000	80282000	94771000	81003000	85843000	0	0	0	0
P62805	H4_HUMAN	Histone H4	H4C1	12872000000	16580000000	13406000000	13916000000	13930000000	14091000000	15710000000	15256000000	13550000000	20747000000	16736000000	16876000000
P62820	RAB1A_HUMAN	Ras-related protein Rab-1A	RAB1A	107080000	0	96568000	104400000	87437000	137070000	146550000	118110000	368610000	325590000	282760000	238130000
P62826	RAN_HUMAN	GTP-binding nuclear protein Ran	RAN	2545400000	2784200000	2605200000	3109200000	2706000000	2673300000	2949300000	3219800000	928720000	872870000	868130000	1222700000
P62829	RL23_HUMAN	60S ribosomal protein L23	RPL23	838040000	873590000	540010000	638790000	703390000	841030000	813040000	844190000	405370000	518810000	453990000	641750000
P62834	RAP1A_HUMAN	Ras-related protein Rap-1A	RAP1A	0	0	0	0	0	0	0	0	56692000	45168000	44531000	0
P62847	RS24_HUMAN	40S ribosomal protein S24	RPS24	547100000	729080000	610800000	570390000	640700000	803650000	724220000	771010000	728680000	421930000	544470000	591470000
P62851	RS25_HUMAN	40S ribosomal protein S25	RPS25	1509500000	1587300000	1345300000	1399600000	1474400000	1342500000	1253200000	1198300000	352290000	380230000	340390000	416130000
P62854	RS26_HUMAN	40S ribosomal protein S26	RPS26	811990000	892170000	631690000	775120000	886130000	798690000	842070000	672420000	2076800000	1146700000	948390000	1560600000
P62857	RS28_HUMAN	40S ribosomal protein S28	RPS28	1049000000	858210000	991260000	962830000	1053600000	1056700000	806780000	895120000	0	0	0	0
P62861	RS30_HUMAN	40S ribosomal protein S30	FAU	439330000	363050000	429800000	469240000	489030000	473650000	476610000	427230000	85239000	0	97390000	80516000
P62873	GBB1_HUMAN	Guanine nucleotide-binding protein G(I)/G(S)/G(T) subunit beta-1	GNB1	353880000	459450000	450800000	500610000	415670000	435320000	546910000	476780000	2535900000	2445400000	2853400000	2400100000
P62875	RPAB5_HUMAN	DNA-directed RNA polymerases I, II, and III subunit RPABC5	POLR2L	37348000	0	35058000	63194000	41246000	0	41806000	39822000	0	0	0	0
P62877	RBX1_HUMAN	E3 ubiquitin-protein ligase RBX1	RBX1	36385000	0	55439000	46632000	40202000	29231000	45511000	44883000	100430000	0	170040000	78528000
P62879	GBB2_HUMAN	Guanine nucleotide-binding protein G(I)/G(S)/G(T) subunit beta-2	GNB2	54620000	541940000	134690000	443620000	513050000	369510000	261700000	318610000	1301400000	1008700000	916000000	745700000
P62888	RL30_HUMAN	60S ribosomal protein L30	RPL30	857240000	932960000	462200000	840660000	839590000	782220000	995380000	916030000	1235800000	1005400000	914150000	872840000
Q59GN2	R39L5_HUMAN	Putative 60S ribosomal protein L39-like 5	RPL39P5	281760000	347270000	434000000	374260000	286850000	185310000	277310000	162710000	0	0	0	0
P62899	RL31_HUMAN	60S ribosomal protein L31	RPL31	897890000	1177300000	614700000	558470000	555920000	480500000	364080000	569510000	230160000	149670000	238310000	156100000
P62906	RL10A_HUMAN	60S ribosomal protein L10a	RPL10A	2474500000	2495500000	2623900000	3081200000	2669500000	2398800000	2605000000	2953400000	7693200000	9074900000	8571800000	8614600000
P62913	RL11_HUMAN	60S ribosomal protein L11	RPL11	297140000	718680000	769730000	612730000	459070000	442040000	476020000	609470000	220740000	262750000	290270000	127450000
P62917	RL8_HUMAN	60S ribosomal protein L8	RPL8	2438700000	2025000000	2125000000	2510800000	2368500000	2725100000	2511300000	2764000000	2308000000	1530700000	3344500000	2186300000
P62937	PPIA_HUMAN	Peptidyl-prolyl cis-trans isomerase A	PPIA	5394900000	4686600000	5102000000	5680800000	4646500000	4587800000	5189500000	6334600000	891200000	1127000000	890380000	794260000
P62942	FKB1A_HUMAN	Peptidyl-prolyl cis-trans isomerase FKBP1A	FKBP1A	195590000	203640000	140650000	328440000	191180000	227380000	422610000	476290000	115270000	0	85018000	0
P62979	RS27A_HUMAN	Ubiquitin-40S ribosomal protein S27a	RPS27A	1889500000	2564500000	2804300000	2973700000	2057200000	2154600000	2270900000	1943200000	1619200000	1516200000	1580400000	1408900000
P62993	GRB2_HUMAN	Growth factor receptor-bound protein 2	GRB2	98043000	100460000	117980000	111770000	82322000	101050000	105000000	105100000	0	0	0	0
P62995	TRA2B_HUMAN	Transformer-2 protein homolog beta	TRA2B	102040000	132990000	119970000	161880000	148340000	150840000	140790000	147780000	24921000	0	0	0
P63000	RAC1_HUMAN	Ras-related C3 botulinum toxin substrate 1	RAC1	595240000	540770000	676240000	731270000	540430000	664920000	784350000	683830000	3702400000	3045000000	3727800000	3305700000
P63010	AP2B1_HUMAN	AP-2 complex subunit beta	AP2B1	536940000	504240000	638860000	600380000	562140000	473710000	571090000	490840000	484730000	438740000	547940000	393460000
P63027	VAMP2_HUMAN	Vesicle-associated membrane protein 2	VAMP2	0	0	0	0	0	0	0	0	0	0	0	15424000
Q5JWF2	GNAS1_HUMAN	Guanine nucleotide-binding protein G(s) subunit alpha isoforms XLas	GNAS	63781000	0	50836000	86509000	109760000	56942000	88526000	78884000	304450000	175600000	329260000	251630000
P63096	GNAI1_HUMAN	Guanine nucleotide-binding protein G(i) subunit alpha-1	GNAI1	0	33991000	0	0	0	0	0	0	86201000	55680000	88541000	79768000
P63104	1433Z_HUMAN	14-3-3 protein zeta/delta	YWHAZ	2389300000	2551300000	3262400000	4003300000	2800500000	3092000000	4785700000	4423700000	103540000	262700000	195100000	117030000
P63151	2ABA_HUMAN	Serine/threonine-protein phosphatase 2A 55 kDa regulatory subunit B alpha isoform	PPP2R2A	176060000	101600000	294920000	260790000	153270000	128530000	175640000	208450000	45285000	0	46389000	56973000
P63165	SUMO1_HUMAN	Small ubiquitin-related modifier 1	SUMO1	415400000	366060000	421210000	332830000	267640000	289140000	322400000	383960000	0	0	0	0
P63167	DYL1_HUMAN	Dynein light chain 1, cytoplasmic	DYNLL1	144880000	145860000	75440000	151720000	167820000	192500000	264700000	285840000	55243000	0	23864000	0
P63173	RL38_HUMAN	60S ribosomal protein L38	RPL38	405600000	384030000	516990000	542750000	443030000	426180000	404960000	457980000	70019000	0	13788000	33698000
P63208	SKP1_HUMAN	S-phase kinase-associated protein 1	SKP1	37934000	31602000	24851000	23408000	20063000	26678000	27319000	41721000	0	0	0	0
P63218	GBG5_HUMAN	Guanine nucleotide-binding protein G(I)/G(S)/G(O) subunit gamma-5	GNG5	0	30240000	0	0	0	0	0	0	0	0	0	0
P63220	RS21_HUMAN	40S ribosomal protein S21	RPS21	1353700000	984760000	1117200000	1140100000	1090100000	1361800000	1548600000	1136600000	0	0	0	24542000
P63241	IF5A1_HUMAN	Eukaryotic translation initiation factor 5A-1	EIF5A	1164500000	1045800000	909220000	1112900000	692080000	711130000	845910000	1345800000	31797000	68257000	45216000	0
P63244	RACK1_HUMAN	Receptor of activated protein C kinase 1	RACK1	4255700000	4577100000	4557700000	5203100000	4594000000	4080600000	4606100000	4779200000	5899400000	4865500000	5444500000	5910800000
P63261	ACTG_HUMAN	Actin, cytoplasmic 2	ACTG1	22972000000	27981000000	17954000000	19395000000	26596000000	29565000000	26056000000	28958000000	31290000000	46793000000	44989000000	39682000000
P63272	SPT4H_HUMAN	Transcription elongation factor SPT4	SUPT4H1	0	0	41170000	43693000	40735000	0	0	50198000	0	0	0	0
P63279	UBC9_HUMAN	SUMO-conjugating enzyme UBC9	UBE2I	353220000	260420000	337550000	348920000	284450000	266090000	307580000	244090000	0	0	0	0
P63313	TYB10_HUMAN	Thymosin beta-10	TMSB10	111200000	147300000	114760000	109830000	78171000	194340000	284660000	224530000	0	0	0	0
P67809	YBOX1_HUMAN	Y-box-binding protein 1	YBX1	1150500000	1214600000	1915300000	2065600000	1290100000	1406800000	1937400000	1678200000	2315600000	1293100000	1903500000	1681000000
P67812	SC11A_HUMAN	Signal peptidase complex catalytic subunit SEC11A	SEC11A	184100000	148830000	116900000	150660000	139200000	98356000	61143000	64712000	580890000	192200000	690850000	475760000
P67870	CSK2B_HUMAN	Casein kinase II subunit beta	CSNK2B	122390000	95620000	96256000	160270000	106610000	129320000	143070000	167620000	30184000	0	65608000	0
P67936	TPM4_HUMAN	Tropomyosin alpha-4 chain	TPM4	1426000000	1319000000	1203300000	1366100000	2106600000	2274600000	2566200000	2579400000	56267000	0	0	37301000
P68032	ACTC_HUMAN	Actin, alpha cardiac muscle 1	ACTC1	2065300000	1555200000	1503700000	1577300000	4081500000	3476600000	2516600000	2284600000	288410000	18581000	118060000	1157400000
P68036	UB2L3_HUMAN	Ubiquitin-conjugating enzyme E2 L3	UBE2L3	379990000	279460000	263230000	222660000	196030000	252850000	263590000	174100000	0	0	0	0
P68104	EF1A1_HUMAN	Elongation factor 1-alpha 1	EEF1A1	12480000000	14510000000	9613700000	10596000000	13900000000	14672000000	12990000000	18229000000	4753600000	5242100000	4693200000	4678200000
P68133	ACTS_HUMAN	Actin, alpha skeletal muscle	ACTA1	0	0	36538000	34793000	52880000	48511000	58022000	61915000	0	0	0	0
P68363	TBA1B_HUMAN	Tubulin alpha-1B chain	TUBA1B	1009300000	855070000	580840000	1317100000	873510000	626700000	1053700000	1475300000	398190000	487610000	156660000	435050000
P68366	TBA4A_HUMAN	Tubulin alpha-4A chain	TUBA4A	109130000	83012000	128960000	135260000	129400000	96046000	137140000	106600000	46132000	18093000	13354000	47192000
P68371	TBB4B_HUMAN	Tubulin beta-4B chain	TUBB4B	9299100000	9588600000	8498700000	9169100000	9633300000	8979200000	9418000000	9125200000	6307900000	5933700000	6367400000	6673900000
P68400	CSK21_HUMAN	Casein kinase II subunit alpha	CSNK2A1	175940000	161840000	143720000	202610000	155510000	141510000	145310000	153750000	158590000	148320000	162900000	215290000
P68402	PA1B2_HUMAN	Platelet-activating factor acetylhydrolase IB subunit alpha2	PAFAH1B2	51781000	81496000	34809000	0	52913000	0	0	0	0	0	0	0
Q71DI3	H32_HUMAN	Histone H3.2	H3C15	8979600000	10125000000	6494000000	4126400000	2571100000	3918200000	3644200000	4373800000	7615700000	6383700000	13593000000	5706900000
P78310	CXAR_HUMAN	Coxsackievirus and adenovirus receptor	CXADR	89360000	80485000	125920000	114870000	10214000	29271000	51937000	48855000	9523500	0	12434000	0
P78316	NOP14_HUMAN	Nucleolar protein 14	NOP14	24873000	28600000	32358000	39396000	26314000	26638000	0	27922000	0	0	0	0
P78318	IGBP1_HUMAN	Immunoglobulin-binding protein 1	IGBP1	0	0	40855000	27358000	0	35915000	36260000	32022000	0	0	0	0
P78324	SHPS1_HUMAN	Tyrosine-protein phosphatase non-receptor type substrate 1	SIRPA	0	0	0	0	0	0	0	0	40716000	0	106540000	0
P78330	SERB_HUMAN	Phosphoserine phosphatase	PSPH	156890000	157830000	180120000	207910000	134660000	149400000	169050000	191100000	0	0	0	0
P78332	RBM6_HUMAN	RNA-binding protein 6	RBM6	28578000	20709000	18377000	20652000	20533000	24472000	21875000	19648000	0	0	0	0
P78344	IF4G2_HUMAN	Eukaryotic translation initiation factor 4 gamma 2	EIF4G2	456000000	431940000	527520000	525820000	504920000	375890000	467060000	318250000	43112000	24135000	55890000	0
P78345	RPP38_HUMAN	Ribonuclease P protein subunit p38	RPP38	7945500	7663100	0	5530300	0	0	0	0	0	0	0	0
P78346	RPP30_HUMAN	Ribonuclease P protein subunit p30	RPP30	24119000	27540000	18875000	24108000	15998000	17599000	15853000	16505000	14170000	0	0	0
P78347	GTF2I_HUMAN	General transcription factor II-I	GTF2I	602020000	513400000	755740000	707430000	551500000	470220000	657650000	606280000	0	0	0	0
P78356	PI42B_HUMAN	Phosphatidylinositol 5-phosphate 4-kinase type-2 beta	PIP4K2B	9258600	0	0	0	0	7429300	8337200	7266100	0	0	0	0
P78357	CNTP1_HUMAN	Contactin-associated protein 1	CNTNAP1	0	0	0	0	0	0	0	0	586190000	396220000	531780000	348710000
P78362	SRPK2_HUMAN	SRSF protein kinase 2	SRPK2	29748000	23793000	30788000	38760000	37638000	21635000	27007000	25701000	0	0	0	0
P78364	PHC1_HUMAN	Polyhomeotic-like protein 1	PHC1	0	0	0	0	0	0	14237000	16968000	0	0	0	0
P78371	TCPB_HUMAN	T-complex protein 1 subunit beta	CCT2	2413200000	2496400000	3269000000	3121400000	2657800000	2387600000	2942500000	3388100000	296800000	231010000	372800000	206540000
P78406	RAE1L_HUMAN	mRNA export factor	RAE1	26910000	0	0	30341000	29340000	31093000	39986000	0	45878000	0	40146000	36647000
P78417	GSTO1_HUMAN	Glutathione S-transferase omega-1	GSTO1	134120000	140660000	148380000	174640000	201080000	177780000	238220000	207210000	0	0	0	0
P78504	JAG1_HUMAN	Protein jagged-1	JAG1	0	0	0	0	0	0	0	0	65125000	28987000	0	12312000
P78527	PRKDC_HUMAN	DNA-dependent protein kinase catalytic subunit	PRKDC	3617600000	2999600000	3168700000	3390100000	3014500000	2420300000	3526000000	1789300000	4633700000	4091500000	3621700000	5493100000
P78536	ADA17_HUMAN	Disintegrin and metalloproteinase domain-containing protein 17	ADAM17	0	0	0	0	0	0	0	0	87539000	84167000	114270000	78176000
P78540	ARGI2_HUMAN	Arginase-2, mitochondrial	ARG2	19526000	18747000	15778000	15764000	24807000	20128000	19841000	15617000	0	0	0	0
P78559	MAP1A_HUMAN	Microtubule-associated protein 1A	MAP1A	17628000	0	0	0	0	0	0	0	21360000	31076000	38947000	47426000
P80297	MT1X_HUMAN	Metallothionein-1X	MT1X	21067000	24182000	14481000	57208000	0	0	13766000	0	0	0	0	0
P80723	BASP1_HUMAN	Brain acid soluble protein 1	BASP1	93258000	0	168850000	119340000	109530000	117160000	259070000	301120000	452540000	0	472190000	275480000
P81605	DCD_HUMAN	Dermcidin	DCD	15303000	29463000	0	21432000	47891000	52201000	20797000	59320000	0	0	0	0
P82650	RT22_HUMAN	28S ribosomal protein S22, mitochondrial	MRPS22	83484000	105550000	85938000	87924000	73644000	131760000	91787000	71246000	101830000	108020000	103150000	77162000
P82663	RT25_HUMAN	28S ribosomal protein S25, mitochondrial	MRPS25	69755000	0	66146000	48808000	36383000	56360000	52702000	51752000	0	30663000	0	0
P82664	RT10_HUMAN	28S ribosomal protein S10, mitochondrial	MRPS10	20800000	0	0	0	0	0	0	0	0	0	0	0
P82673	RT35_HUMAN	28S ribosomal protein S35, mitochondrial	MRPS35	48480000	39595000	64354000	51354000	57476000	34204000	51826000	36203000	0	0	16963000	0
P82675	RT05_HUMAN	28S ribosomal protein S5, mitochondrial	MRPS5	0	0	0	0	0	0	0	0	131420000	61143000	134290000	85537000
P82909	RT36_HUMAN	28S ribosomal protein S36, mitochondrial	MRPS36	13535000	13830000	18964000	21233000	18384000	24981000	20586000	21976000	0	0	0	0
P82912	RT11_HUMAN	28S ribosomal protein S11, mitochondrial	MRPS11	19581000	0	0	34098000	17208000	18198000	34545000	17751000	0	0	0	21016000
P82914	RT15_HUMAN	28S ribosomal protein S15, mitochondrial	MRPS15	39344000	42160000	29730000	25865000	45834000	32475000	0	28721000	70208000	72477000	48379000	61514000
P82921	RT21_HUMAN	28S ribosomal protein S21, mitochondrial	MRPS21	34759000	24432000	26039000	22124000	27017000	36227000	23844000	21423000	0	0	28761000	0
P82930	RT34_HUMAN	28S ribosomal protein S34, mitochondrial	MRPS34	95303000	0	0	0	0	0	0	0	42839000	82299000	114770000	31656000
P82932	RT06_HUMAN	28S ribosomal protein S6, mitochondrial	MRPS6	48759000	36122000	51634000	55573000	32265000	32247000	33776000	0	0	0	0	0
P82933	RT09_HUMAN	28S ribosomal protein S9, mitochondrial	MRPS9	103120000	67091000	94801000	107940000	82626000	90197000	102440000	101360000	69259000	39203000	103330000	92502000
P82970	HMGN5_HUMAN	High mobility group nucleosome-binding domain-containing protein 5	HMGN5	0	0	42582000	45014000	0	0	0	0	0	0	0	0
P82979	SARNP_HUMAN	SAP domain-containing ribonucleoprotein	SARNP	626680000	625020000	702840000	867150000	564010000	546680000	682370000	675960000	0	0	0	0
P83111	LACTB_HUMAN	Serine beta-lactamase-like protein LACTB, mitochondrial	LACTB	30139000	28273000	25665000	27620000	37072000	25322000	33810000	36643000	70925000	79700000	76574000	49686000
P83731	RL24_HUMAN	60S ribosomal protein L24	RPL24	1739400000	1648500000	1057700000	1153100000	1284600000	1081800000	1125100000	1108500000	1533100000	1299100000	1271200000	1369900000
Q969Q0	RL36L_HUMAN	60S ribosomal protein L36a-like	RPL36AL	0	0	0	0	33741000	34366000	34223000	0	128610000	76879000	125750000	97954000
P83916	CBX1_HUMAN	Chromobox protein homolog 1	CBX1	144180000	130760000	214060000	137650000	82629000	73247000	87656000	118560000	0	0	0	0
P84022	SMAD3_HUMAN	Mothers against decapentaplegic homolog 3	SMAD3	0	0	0	0	0	0	0	0	44876000	0	0	0
P84085	ARF5_HUMAN	ADP-ribosylation factor 5	ARF5	27911000	30901000	29248000	28467000	40248000	34058000	25691000	28213000	0	0	0	0
P84090	ERH_HUMAN	Enhancer of rudimentary homolog	ERH	0	80857000	118520000	82486000	82571000	70187000	113250000	109720000	0	0	0	0
P84095	RHOG_HUMAN	Rho-related GTP-binding protein RhoG	RHOG	18706000	0	36161000	31675000	30740000	43007000	35389000	50507000	790930000	663520000	479540000	406200000
P84098	RL19_HUMAN	60S ribosomal protein L19	RPL19	470660000	738630000	449500000	235980000	167370000	192100000	254330000	224850000	683960000	350620000	1281400000	296150000
P84103	SRSF3_HUMAN	Serine/arginine-rich splicing factor 3	SRSF3	497370000	580500000	405990000	461050000	713020000	545880000	549170000	683350000	0	0	0	0
P86790	CCZ1B_HUMAN	Vacuolar fusion protein CCZ1 homolog B	CCZ1B	0	0	0	0	0	0	0	0	28649000	32428000	29801000	0
P98082	DAB2_HUMAN	Disabled homolog 2	DAB2	0	0	0	0	0	0	0	0	35246000	39274000	35006000	34194000
P98155	VLDLR_HUMAN	Very low-density lipoprotein receptor	VLDLR	6865700	0	0	0	0	0	18778000	18697000	0	0	0	0
P98160	PGBM_HUMAN	Basement membrane-specific heparan sulfate proteoglycan core protein	HSPG2	14677000	6475500	13773000	2273900	9972000	4580600	5384900	3972900	1373300000	332700000	509100000	372840000
P98170	XIAP_HUMAN	E3 ubiquitin-protein ligase XIAP	XIAP	0	0	0	0	0	0	0	8290400	0	0	0	0
P98172	EFNB1_HUMAN	Ephrin-B1	EFNB1	0	0	0	0	0	0	0	0	25417000	38534000	29379000	0
P98173	FAM3A_HUMAN	Protein FAM3A	FAM3A	0	0	0	0	0	0	0	0	45428000	0	0	0
P98175	RBM10_HUMAN	RNA-binding protein 10	RBM10	71888000	68178000	109930000	88856000	40886000	45119000	73552000	42760000	0	0	0	0
P98179	RBM3_HUMAN	RNA-binding protein 3	RBM3	58372000	62648000	0	77238000	97570000	94625000	123650000	105630000	0	0	0	0
P98194	AT2C1_HUMAN	Calcium-transporting ATPase type 2C member 1	ATP2C1	43092000	55158000	56439000	48090000	56178000	28482000	31945000	0	392700000	99251000	295900000	131110000
P98196	AT11A_HUMAN	Phospholipid-transporting ATPase IH	ATP11A	0	0	0	0	0	0	0	0	70818000	68445000	53772000	0
P99999	CYC_HUMAN	Cytochrome c	CYCS	104450000	117940000	121860000	96492000	0	92101000	106040000	124710000	0	0	0	0
Q00013	EM55_HUMAN	55 kDa erythrocyte membrane protein	MPP1	6272300	6638800	4580000	5331300	0	0	8649600	6382700	8838000	12811000	12706000	13054000
Q00059	TFAM_HUMAN	Transcription factor A, mitochondrial	TFAM	235500000	170990000	250410000	269120000	181080000	178980000	220440000	231030000	13360000	0	46645000	0
Q00169	PIPNA_HUMAN	Phosphatidylinositol transfer protein alpha isoform	PITPNA	62284000	49574000	60057000	53991000	52918000	69647000	55147000	60510000	103400000	0	139120000	56605000
Q00325	MPCP_HUMAN	Phosphate carrier protein, mitochondrial	SLC25A3	702670000	514730000	462890000	519500000	724880000	567210000	615790000	513500000	2009500000	2044500000	2358300000	1846900000
Q00403	TF2B_HUMAN	Transcription initiation factor IIB	GTF2B	0	0	11506000	10063000	0	6651200	0	7445700	0	0	0	0
Q00534	CDK6_HUMAN	Cyclin-dependent kinase 6	CDK6	0	0	0	0	16078000	14825000	17861000	0	0	0	0	0
Q00535	CDK5_HUMAN	Cyclin-dependent-like kinase 5	CDK5	0	0	0	0	0	0	0	0	0	0	0	1008400
Q00537	CDK17_HUMAN	Cyclin-dependent kinase 17	CDK17	13295000	0	11750000	0	17079000	12423000	0	8259700	226520000	91508000	227740000	108480000
Q00587	BORG5_HUMAN	Cdc42 effector protein 1	CDC42EP1	0	0	0	0	0	0	0	0	0	0	3059400	0
Q00610	CLH1_HUMAN	Clathrin heavy chain 1	CLTC	3065800000	3520400000	3538500000	3381700000	3437400000	3521500000	3706500000	3596900000	6993800000	6786200000	6489000000	7469800000
Q00653	NFKB2_HUMAN	Nuclear factor NF-kappa-B p100 subunit	NFKB2	0	0	0	0	0	0	1798500	0	0	0	0	0
Q00688	FKBP3_HUMAN	Peptidyl-prolyl cis-trans isomerase FKBP3	FKBP3	872620000	645670000	971520000	784400000	613900000	665960000	748990000	1025200000	0	0	15187000	0
Q00765	REEP5_HUMAN	Receptor expression-enhancing protein 5	REEP5	102440000	103700000	69282000	87591000	65229000	73193000	68059000	61325000	52642000	128990000	130130000	166850000
Q00796	DHSO_HUMAN	Sorbitol dehydrogenase	SORD	361470000	250090000	398530000	372030000	146070000	164640000	163750000	162800000	0	0	0	0
Q00839	HNRPU_HUMAN	Heterogeneous nuclear ribonucleoprotein U	HNRNPU	3907600000	3751300000	4407400000	4944200000	4235400000	3987300000	5480000000	5197800000	1082100000	839830000	1003600000	919890000
Q01082	SPTB2_HUMAN	Spectrin beta chain, non-erythrocytic 1	SPTBN1	2221900000	2181800000	2438300000	2214200000	2074500000	1955400000	2217000000	2082000000	2666400000	2202800000	2712400000	2210100000
Q01085	TIAR_HUMAN	Nucleolysin TIAR	TIAL1	154190000	129030000	159520000	154450000	145800000	120890000	115990000	123910000	0	0	0	0
Q01105	SET_HUMAN	Protein SET	SET	2408300000	2201700000	3101500000	3295700000	2337100000	2454400000	2829200000	2666900000	0	0	0	0
Q01130	SRSF2_HUMAN	Serine/arginine-rich splicing factor 2	SRSF2	536760000	311020000	696550000	677400000	578130000	613500000	476990000	571180000	41889000	0	44487000	0
Q01433	AMPD2_HUMAN	AMP deaminase 2	AMPD2	19635000	16942000	0	17601000	12372000	17884000	0	18032000	0	0	0	0
Q01469	FABP5_HUMAN	Fatty acid-binding protein 5	FABP5	1054100000	888070000	1080400000	1412800000	1240400000	1485500000	2162400000	2338300000	0	0	0	0
Q01518	CAP1_HUMAN	Adenylyl cyclase-associated protein 1	CAP1	1137600000	522880000	1263000000	1242500000	976890000	1435200000	1512800000	1460900000	460500000	193910000	418360000	233820000
Q01581	HMCS1_HUMAN	Hydroxymethylglutaryl-CoA synthase, cytoplasmic	HMGCS1	716760000	1292100000	1251500000	1277400000	1451200000	1481400000	1737200000	736770000	0	0	0	0
Q01638	ILRL1_HUMAN	Interleukin-1 receptor-like 1	IL1RL1	0	0	0	0	0	0	0	0	0	0	0	7115400
Q01650	LAT1_HUMAN	Large neutral amino acids transporter small subunit 1	SLC7A5	176910000	1058400000	20812000	259890000	97688000	76909000	64615000	78889000	0	0	0	0
Q01780	EXOSX_HUMAN	Exosome component 10	EXOSC10	72173000	53654000	90797000	50613000	59024000	48392000	78393000	57314000	0	0	0	0
Q01804	OTUD4_HUMAN	OTU domain-containing protein 4	OTUD4	28510000	0	17481000	19578000	28959000	28847000	20132000	15099000	0	0	0	0
Q01813	PFKAP_HUMAN	ATP-dependent 6-phosphofructokinase, platelet type	PFKP	647230000	615140000	771570000	818590000	965750000	837460000	1026600000	921640000	2727600000	1740800000	2524300000	1826900000
Q01844	EWS_HUMAN	RNA-binding protein EWS	EWSR1	320280000	239860000	408040000	358350000	252080000	160630000	326630000	340660000	0	0	0	0
Q01968	OCRL_HUMAN	Inositol polyphosphate 5-phosphatase OCRL	OCRL	0	0	10346000	0	0	22347000	18596000	0	0	0	0	0
Q01970	PLCB3_HUMAN	1-phosphatidylinositol 4,5-bisphosphate phosphodiesterase beta-3	PLCB3	155650000	141620000	139940000	196450000	146140000	118060000	105070000	116000000	22459000	0	0	0
Q01973	ROR1_HUMAN	Inactive tyrosine-protein kinase transmembrane receptor ROR1	ROR1	22473000	110540000	63456000	0	0	0	0	0	0	0	0	0
Q01995	TAGL_HUMAN	Transgelin	TAGLN	2354500000	1830600000	1995600000	2275400000	4467100000	4663100000	3900100000	3625200000	0	0	0	0
Q02040	AK17A_HUMAN	A-kinase anchor protein 17A	AKAP17A	14299000	18867000	0	0	0	0	0	0	0	0	0	0
Q02127	PYRD_HUMAN	Dihydroorotate dehydrogenase (quinone), mitochondrial	DHODH	0	0	0	0	0	0	0	0	55584000	0	61433000	28702000
Q02218	ODO1_HUMAN	2-oxoglutarate dehydrogenase, mitochondrial	OGDH	172170000	155940000	130730000	111980000	190350000	180110000	191050000	209370000	186990000	55246000	99056000	74796000
Q02241	KIF23_HUMAN	Kinesin-like protein KIF23	KIF23	88243000	79794000	102940000	134800000	96671000	112440000	145530000	91823000	0	0	0	0
Q02252	MMSA_HUMAN	Methylmalonate-semialdehyde dehydrogenase [acylating], mitochondrial	ALDH6A1	42087000	42384000	58010000	58255000	57073000	71948000	70890000	50017000	0	0	0	0
Q02297	NRG1_HUMAN	Pro-neuregulin-1, membrane-bound isoform	NRG1	0	0	0	0	0	0	0	0	145430000	127030000	128910000	136740000
Q02543	RL18A_HUMAN	60S ribosomal protein L18a	RPL18A	1016700000	1011200000	805370000	1127900000	934280000	1091100000	1051100000	1032400000	1799900000	2099700000	1775300000	1839800000
Q02750	MP2K1_HUMAN	Dual specificity mitogen-activated protein kinase kinase 1	MAP2K1	152550000	135750000	164400000	164480000	143740000	153260000	202270000	187830000	125090000	93559000	106020000	94342000
Q02763	TIE2_HUMAN	Angiopoietin-1 receptor	TEK	0	0	0	0	0	0	0	0	33922000	40222000	25432000	42381000
Q02790	FKBP4_HUMAN	Peptidyl-prolyl cis-trans isomerase FKBP4	FKBP4	1196300000	776310000	1591900000	1525100000	951310000	1063300000	1292500000	1673300000	0	0	0	0
Q02809	PLOD1_HUMAN	Procollagen-lysine,2-oxoglutarate 5-dioxygenase 1	PLOD1	88495000	46832000	85696000	110150000	51905000	69151000	96968000	66434000	1154000000	623160000	1273900000	666950000
Q02818	NUCB1_HUMAN	Nucleobindin-1	NUCB1	261570000	214130000	144370000	219520000	266660000	206280000	216420000	210810000	198130000	142220000	263510000	0
Q02878	RL6_HUMAN	60S ribosomal protein L6	RPL6	3384900000	4050200000	3559600000	3916300000	3551800000	3910000000	4209000000	3848600000	5939500000	3744800000	6652700000	4744500000
Q02880	TOP2B_HUMAN	DNA topoisomerase 2-beta	TOP2B	149690000	108370000	186720000	201530000	135510000	131240000	136170000	134400000	63164000	37652000	46053000	19736000
Q02952	AKA12_HUMAN	A-kinase anchor protein 12	AKAP12	450340000	617510000	687760000	646880000	457160000	480880000	581590000	568550000	1461100000	817720000	1068500000	982360000
Q02978	M2OM_HUMAN	Mitochondrial 2-oxoglutarate/malate carrier protein	SLC25A11	337640000	267110000	281480000	344890000	276570000	232250000	276570000	251080000	633150000	500460000	667890000	369440000
Q03001	DYST_HUMAN	Dystonin	DST	29333000	30347000	28391000	34164000	35346000	42462000	47804000	24808000	15067000	0	40727000	0
Q03113	GNA12_HUMAN	Guanine nucleotide-binding protein subunit alpha-12	GNA12	0	0	0	0	0	0	0	0	6843700	0	9945100	0
Q03135	CAV1_HUMAN	Caveolin-1	CAV1	60880000	0	103330000	137680000	190600000	212520000	242290000	151240000	8877400000	12465000000	10863000000	12922000000
Q03154	ACY1_HUMAN	Aminoacylase-1	ACY1	31542000	38169000	44780000	36887000	47257000	38644000	42087000	49202000	0	0	0	0
Q03164	KMT2A_HUMAN	Histone-lysine N-methyltransferase 2A	KMT2A	0	5653600	0	0	0	0	0	0	0	0	0	0
Q03252	LMNB2_HUMAN	Lamin-B2	LMNB2	443760000	404680000	601320000	606220000	460390000	572130000	646980000	628070000	183390000	145550000	264240000	147460000
Q03405	UPAR_HUMAN	Urokinase plasminogen activator surface receptor	PLAUR	0	0	0	0	0	0	0	0	144840000	114260000	139430000	144280000
Q03426	KIME_HUMAN	Mevalonate kinase	MVK	0	0	16418000	0	0	0	0	0	0	0	0	0
Q03518	TAP1_HUMAN	Antigen peptide transporter 1	TAP1	0	0	0	0	0	0	0	0	49746000	63603000	47557000	78741000
Q03519	TAP2_HUMAN	Antigen peptide transporter 2	TAP2	0	0	0	0	0	0	0	0	63702000	67740000	54609000	128730000
Q03701	CEBPZ_HUMAN	CCAAT/enhancer-binding protein zeta	CEBPZ	163690000	125430000	152890000	160310000	173770000	141970000	164250000	167500000	43194000	15740000	23151000	49892000
Q04323	UBXN1_HUMAN	UBX domain-containing protein 1	UBXN1	66207000	55891000	0	58979000	61771000	59445000	63563000	61028000	0	0	0	0
Q04446	GLGB_HUMAN	1,4-alpha-glucan-branching enzyme	GBE1	16380000	103670000	12229000	9810600	38842000	124930000	27648000	0	155740000	116840000	158270000	141570000
Q04656	ATP7A_HUMAN	Copper-transporting ATPase 1	ATP7A	0	0	0	0	0	0	0	0	0	25884000	0	0
Q04721	NOTC2_HUMAN	Neurogenic locus notch homolog protein 2	NOTCH2	0	0	0	0	0	0	0	0	45526000	0	52395000	0
Q04724	TLE1_HUMAN	Transducin-like enhancer protein 1	TLE1	0	19394000	0	0	0	0	0	0	0	0	0	0
Q04726	TLE3_HUMAN	Transducin-like enhancer protein 3	TLE3	42559000	33584000	25393000	16489000	31094000	24493000	0	0	24125000	0	0	0
Q04760	LGUL_HUMAN	Lactoylglutathione lyase	GLO1	521700000	499370000	314800000	201760000	148000000	172660000	228490000	311200000	0	0	0	0
Q04771	ACVR1_HUMAN	Activin receptor type-1	ACVR1	0	0	0	0	0	0	0	0	0	0	0	17558000
Q04828	AK1C1_HUMAN	Aldo-keto reductase family 1 member C1	AKR1C1	28162000	0	35071000	0	19400000	23408000	0	4117400	0	0	0	0
Q04837	SSBP_HUMAN	Single-stranded DNA-binding protein, mitochondrial	SSBP1	456900000	414680000	567440000	485110000	461190000	417130000	501510000	480370000	438860000	511870000	584750000	419970000
Q04917	1433F_HUMAN	14-3-3 protein eta	YWHAH	855940000	853970000	1074000000	1043500000	608790000	739200000	980430000	728340000	75085000	0	55336000	0
Q04941	PLP2_HUMAN	Proteolipid protein 2	PLP2	0	0	0	0	0	0	0	0	0	0	0	1364100000
Q05048	CSTF1_HUMAN	Cleavage stimulation factor subunit 1	CSTF1	50634000	42178000	105650000	90000000	58634000	54293000	99716000	87009000	117760000	138920000	144980000	108690000
Q05086	UBE3A_HUMAN	Ubiquitin-protein ligase E3A	UBE3A	57778000	46284000	49196000	56651000	55148000	43731000	49191000	43458000	0	0	0	0
Q05209	PTN12_HUMAN	Tyrosine-protein phosphatase non-receptor type 12	PTPN12	30400000	27059000	22288000	12829000	31013000	29436000	23721000	32787000	0	0	0	0
Q05397	FAK1_HUMAN	Focal adhesion kinase 1	PTK2	30749000	60301000	45695000	51760000	65429000	58521000	57680000	61503000	107500000	60574000	92710000	69893000
Q05519	SRS11_HUMAN	Serine/arginine-rich splicing factor 11	SRSF11	81800000	81995000	84927000	92642000	108790000	89533000	91696000	101490000	0	0	0	0
Q05639	EF1A2_HUMAN	Elongation factor 1-alpha 2	EEF1A2	0	0	0	0	0	0	0	15686000	0	0	0	0
Q05655	KPCD_HUMAN	Protein kinase C delta type	PRKCD	11818000	0	0	18177000	37405000	33303000	17830000	22511000	32754000	0	22414000	44347000
Q05682	CALD1_HUMAN	Caldesmon	CALD1	895520000	665960000	2424200000	1583100000	2251400000	2234700000	5825200000	6283400000	414340000	260410000	552840000	148910000
Q06124	PTN11_HUMAN	Tyrosine-protein phosphatase non-receptor type 11	PTPN11	64547000	62120000	74489000	77451000	71170000	69864000	82128000	82446000	0	0	73687000	0
Q06136	KDSR_HUMAN	3-ketodihydrosphingosine reductase	KDSR	32990000	0	66512000	0	70323000	41803000	68203000	30670000	42746000	0	32395000	48259000
Q06203	PUR1_HUMAN	Amidophosphoribosyltransferase	PPAT	153070000	134770000	118280000	124170000	145940000	177660000	157750000	131610000	0	0	0	0
Q06210	GFPT1_HUMAN	Glutamine--fructose-6-phosphate aminotransferase [isomerizing] 1	GFPT1	522480000	533450000	715500000	825840000	608270000	582590000	777920000	767810000	913700000	626590000	822670000	673640000
Q06265	EXOS9_HUMAN	Exosome complex component RRP45	EXOSC9	32906000	0	27210000	28922000	32926000	27076000	31051000	36433000	0	0	0	0
Q06323	PSME1_HUMAN	Proteasome activator complex subunit 1	PSME1	278540000	253040000	258820000	308160000	293000000	259720000	279920000	237540000	0	0	0	0
Q06330	SUH_HUMAN	Recombining binding protein suppressor of hairless	RBPJ	39610000	34446000	43803000	42851000	36530000	34689000	28094000	33385000	0	0	0	0
Q06481	APLP2_HUMAN	Amyloid-like protein 2	APLP2	56523000	60098000	44185000	69504000	71515000	37139000	86304000	42260000	738180000	283710000	395870000	456160000
Q06830	PRDX1_HUMAN	Peroxiredoxin-1	PRDX1	11600000000	8304500000	9761200000	9974300000	8068000000	8558400000	8019800000	10464000000	332550000	510990000	373160000	487860000
Q07020	RL18_HUMAN	60S ribosomal protein L18	RPL18	2212900000	2795000000	2633800000	2948000000	2501900000	3164400000	2756200000	2795000000	7864100000	6875600000	6044300000	8696700000
Q07021	C1QBP_HUMAN	Complement component 1 Q subcomponent-binding protein, mitochondrial	C1QBP	172090000	90514000	158050000	147290000	136820000	118690000	136870000	126090000	0	0	0	0
Q07065	CKAP4_HUMAN	Cytoskeleton-associated protein 4	CKAP4	934700000	698920000	852780000	835580000	554590000	685550000	640830000	855690000	36210000000	29323000000	35745000000	24776000000
Q07617	SPAG1_HUMAN	Sperm-associated antigen 1	SPAG1	0	0	0	0	0	0	0	0	0	0	0	5554200
Q07666	KHDR1_HUMAN	KH domain-containing, RNA-binding, signal transduction-associated protein 1	KHDRBS1	319110000	449760000	340400000	218690000	101380000	122860000	184650000	276600000	68212000	0	155430000	0
Q07812	BAX_HUMAN	Apoptosis regulator BAX	BAX	75943000	54951000	66882000	82270000	115110000	108840000	131160000	114830000	0	0	0	0
Q07820	MCL1_HUMAN	Induced myeloid leukemia cell differentiation protein Mcl-1	MCL1	24001000	25917000	27786000	38988000	36887000	27678000	29245000	33238000	0	0	0	0
Q07864	DPOE1_HUMAN	DNA polymerase epsilon catalytic subunit A	POLE	0	0	0	22507000	22644000	18178000	0	0	0	0	0	0
Q07954	LRP1_HUMAN	Prolow-density lipoprotein receptor-related protein 1	LRP1	108790000	70008000	98663000	96394000	51353000	66197000	104990000	94911000	83169000	0	0	0
Q07955	SRSF1_HUMAN	Serine/arginine-rich splicing factor 1	SRSF1	443680000	427160000	537620000	584450000	448000000	504440000	583890000	529080000	17494000	0	25900000	0
Q07960	RHG01_HUMAN	Rho GTPase-activating protein 1	ARHGAP1	182790000	174970000	217860000	168890000	162220000	157130000	161930000	131440000	55822000	53790000	179680000	105100000
Q08170	SRSF4_HUMAN	Serine/arginine-rich splicing factor 4	SRSF4	0	0	0	0	0	0	0	25552000	0	0	0	0
Q08174	PCDH1_HUMAN	Protocadherin-1	PCDH1	47703000	0	61821000	48617000	98448000	73451000	46375000	48311000	155090000	88033000	116310000	82619000
Q08209	PP2BA_HUMAN	Serine/threonine-protein phosphatase 2B catalytic subunit alpha isoform	PPP3CA	80126000	80329000	76370000	85516000	47157000	60008000	56919000	58593000	60298000	79425000	55842000	69852000
Q08211	DHX9_HUMAN	ATP-dependent RNA helicase A	DHX9	2229400000	1979200000	2505800000	2244600000	1917000000	1816700000	2055500000	2098700000	773710000	672340000	820170000	647840000
Q08257	QOR_HUMAN	Quinone oxidoreductase	CRYZ	10715000	0	0	10425000	24372000	28940000	31648000	25073000	28436000	35004000	38947000	0
Q08357	S20A2_HUMAN	Sodium-dependent phosphate transporter 2	SLC20A2	0	0	0	0	0	0	0	0	0	0	11080000	0
Q08378	GOGA3_HUMAN	Golgin subfamily A member 3	GOLGA3	17731000	16682000	27844000	15858000	13642000	24315000	26957000	24769000	0	0	0	0
[truncated: 2,870 more rows]

## Sheet: Table S2
Supplementary Table S2 - Differential cell proteome analysis of iPSCs and HUVECs
No. genes	High expression in iPSCs (p<0.05, FC=1.5)	Low expression in iPSCs (p<0.05, FC=1.5)	Commonly dysregulated in all groups (p<0.05, FC=1.5)
1	TAGLN	SLC38A2	RBP1
2	TPM1	SPCS1	USP11
3	PSAT1	NECTIN2	LCP1
4	TPM3	MOV10	PLS3
5	CRABP1	AGPAT5	FLNA
6	NASP	LEMD2	TES
7	IDH1	HLA-A	LPP
8	L1TD1	PLOD2.1	PPL
9	RBMX	PECAM1	SYAP1
10	LIN28A	MVP	THOC3
11	DPYSL3	CD59	SPP1
12	UCHL1	CPT1A	SPTBN2
13	HMGB1	ANPEP	ZCCHC8
14	STIP1	NT5E	ARHGEF40
15	SET	RFTN1	ARFGAP3
16	PHGDH	FNDC3B	UBR7
17	HNRNPA3	CD47	CDH2
18	TAGLN2	ICAM2	EPS8L2
19	NES	TCIRG1	NEXN
20	MCM6	TMEM109	ACTN1
21	SF3A1	PVR	COL18A1
22	PRMT1	PARP4	PXN
23	KHSRP	PLXNA2	UBE2V2
24	SF3B3	DOCK9	AK6
25	FKBP3	STX12	CEP72
26	STMN1	CAVIN2	MACROH2A2
27	CNDP2	CYB5R1	RPL10
28	BTF3	MICAL2	TXNDC12
29	HNRNPH3	STAB1	PDLIM2
30	PEBP1	RAB32	INA
31	SLC2A3	RAC2	FLNC
32	APEX1	SNTB2	COL12A1
33	EEF1B2	TGM2	FGFBP3
34	TBCA	HHIP	DPYSL4
35	GLRX3	TNFSF4	VGF
36	PRDX2	ZDHHC13	PALLD
37	CBS	NOS3	SH3BP4
38	ASNS	VWF	CAPN2
39	DNMT3B	DYSF	CAVIN3
40	SERBP1	ADAM9	LAMB1
41	HNRNPA2B1	JAK1	EMC7
42	AK4	FERMT3	SSH1
43	CBX3	NCEH1	CRYZ
44	CSDE1	STOM	OCIAD2
45	APOE	CSRP1	PDLIM7
46	AHCY	DHRS7	ANXA2
47	TALDO1	COMT	VIM
48	ACAT2	ECE1	LMNA
49	YWHAQ	NNT	DGKA
50	WARS1	SELENOS	PXDN
51	RPS21	RPL36AL	HSPB1
52	HMGB2	ALCAM	MYO6
53	NAP1L1	RFLNA	PLEC
54	SARNP	ITGAV	RPS27L
55	FUBP1	FAM241A	MYH9
56	PFAS	LTBP2	RPN1
57	FKBP4	SLC35E1	FRAS1
58	HMGCS1	CCPG1	SAMHD1
59	HNRNPR	PRAF2	FABP7
60	VCL	APMAP	PGM2L1
61	PDLIM1	RALA	DNAJC17
62	GOT1	PLXNB2	MED17
63	PSMB1	EHD1	RAF1
64	ST13	CD55	NQO1
65	TMSB4X	STEAP3	MTX1
66	ANXA3	LNPEP	METTL5
67	CKB	HLA-B.1	ITM2C
68	FABP5	GIMAP1	NUDT16L1
69	GPC4	GALNT6	THUMPD1
70	PTBP1	MGAT1	EXOSC4
71	CDV3	FNDC3A	SFRP2
72	GSTO1	NRG1
73	STK26	GYS1
74	PAWR	SLC27A4
75	BOLA2	ATP11C
76	TCOF1	EPHB2
77	HINT1	SLC9A3R2
78	RBM12	TIE1
79	XRCC6	ERGIC1
80	COPS4	PLSCR3
81	HDGF	ADAM15
82	EIF1AX	IL6ST
83	HELLS	TXNDC5
84	PSMD8	SLC43A3
85	XRN2	CDH5
86	SRSF9	IGFBP7
87	DSG2	PTTG1IP
88	ARPC3	TMEM30A
89	PODXL	STING1
90	NUDT5	RALB
91	GNPDA1	DOCK10
92	CSTB	MMP1
93	HK2	VPS11
94	RPS19	CKAP4
95	QPRT	MMRN2
96	PTGES3	SQOR
97	CSRP2	P4HA2
98	UBE2L3	CRIM1
99	SEPHS1	MGAT2
100	UGP2	DPY19L1
101	GLOD4	NRCAM
102	RNPS1	ENDOD1
103	HNRNPK	PTPRB
104	SLC9A3R1	IFI16
105	COPS2	PLAT
106	TSN	MAOA
107	THY1	TCAF2
108	DUT	TAOK3
109	SALL4	NRP1
110	EIF4A2	EFEMP1
111	TCERG1	MCTP1
112	CIAPIN1	ESAM
113	MTAP	GPRC5A
114	ALPL	MMRN1
115	PSME1	CNTNAP1
116	ANP32E	COPG1
117	PDCD10	GALNT2
118	PRDX1	SLC4A2
119	BLMH	HADHA
120	RRM2	ITGB1
121	USP7	MTCH2
122	GATAD2A	COPB2
123	EIF3M	DDOST
124	EIF3G	DIPK2A
125	SAFB	TACSTD2
126	SRP9	LNPK
127	TNKS1BP1	CS
128	NSFL1C	BCAP31
129	GMFB	CAVIN1
130	RANBP3	AHNAK2
131	RPA1	FHL2
132	PSMD6	SERPINE1
133	EDF1	ITGA2
134	CBX5	MYOF
135	CRMP1	AHNAK
136	PPP1R12A
137	TXNL1
138	PUF60
139	CCAR2
140	SF1
141	VCAN
142	CLDN6
143	VTN
144	CARS1
145	BCLAF1
146	NOLC1
147	SNU13
148	NAA50
149	ADSL
150	PSME3
151	RTRAF
152	SRP14
153	PEDS1-UBE2V1
154	RAD23B
155	EIF4B
156	SUMO1
157	RPL39P5
158	HNRNPA0
159	TRIM71
160	MKI67
161	UBE2K
162	RANBP1
163	RPSA
164	MIF
165	HNRNPDL
166	TXN
167	UBE2N
168	DPP3
169	NUDT21
170	JPT2
171	TARDBP
172	PPM1G
173	AKR1B1
174	ALYREF
175	PSMD4
176	THRAP3
177	PRRC2C
178	ADSS2
179	PFN1
180	CASP3
181	SRSF3
182	EIF4H
183	SOD1
184	YARS1
185	GTF2I
186	TPR
187	TF
188	FDPS
189	MSH2
190	HMGB3
191	PPA1
192	SF3B2
193	ELAVL1
194	XRCC5
195	TPP2
196	MDN1
197	HNRNPAB
198	SUB1
199	SRSF1
200	MFGE8
201	ENO2
202	EPPK1
203	CNN1
204	SMS
205	TCEA1
206	DSP
207	CRABP2
208	CCN1
209	UPP1
210	ANXA1
211	PIN4
212	CAPG
213	GDI1
214	NA.2
215	DDAH1
216	BLVRA
217	LEFTY2
218	GSTP1
219	KIF1A
220	PPM1B
221	RPLP2
222	KRT18
223	CNN3
224	PDCD5
225	KDM1A
226	KDM3B
227	RBPMS2
228	EDC4
229	PPID
230	CPSF6
231	PSMA4
232	GPS1
233	ANP32B
234	CARM1
235	DAZAP1
236	SRSF11
237	LSM6
238	NUDCD1
239	WBP11
240	NUP35
241	PTK7
242	LYPLA1
243	BAG2
244	SNW1
245	MANF
246	NONO
247	SNRPA1
248	NRDC
249	DNMT3A
250	CD2AP
251	TIAL1
252	CTBP2
253	PAFAH1B3
254	PELP1
255	HMBS
256	NUP153
257	VTA1
258	CZIB
259	SART1
260	MAGOHB
261	PRPF31
262	PGM1
263	IMPA1
264	NT5C2
265	ILF2
266	TMOD3
267	XPNPEP1
268	ARID3B
269	PSPH
270	PRPS1
271	PCMT1
272	SNRPA
273	ENO1
274	RUVBL1
275	PTBP2
276	CCDC6
277	PRRC1
278	CHTOP
279	CCT2
280	PUS7
281	CRK
282	SH3GLB1
283	KPNA4
284	HNRNPH1
285	RUVBL2
286	GRB2
287	RNPEP
288	SMARCA1
289	SH3PXD2B
290	HNRNPC
291	EPN1
292	EIF3J
293	ADK
294	CETN2
295	DTYMK
296	PRPF3
297	TXNDC9
298	NAGK
299	IQGAP2
300	AIF1L
301	ITPA
302	AK2
303	NQO2
304	SLC7A3

## Sheet: Table S3
Supplementary Table S3 - iPSC and NV proteome analysis
				Cell lysate (WCL), LFQ intensity								NVs, LFQ intensity
Protein Accession	Entry Name	Protein Name	Gene Name	WCL_CERA_1	WCL_CERA_2	WCL_CERA_3	WCL_CERA_4	WCL_CL2_1	WCL_CL2_2	WCL_CL2_3	WCL_CL2_4	CERA_NVs_1	CERA_NVs_2	CERA_NVs_3	CERA_NVs_4	CL2_NVs_1	CL2_NVs_2	CL2_NVs_3	CL2_NVs_4
P63261	ACTG_HUMAN	Actin, cytoplasmic 2	ACTG1	22972000000	27981000000	17954000000	19395000000	26596000000	29565000000	26056000000	28958000000	25543000000	33085000000	30929000000	23737000000	24131000000	18338000000	22205000000	18579000000
P08670	VIME_HUMAN	Vimentin	VIM	5188800000	4421200000	4707500000	5097000000	13230000000	12549000000	14070000000	14697000000	962310000	839210000	994310000	983580000	831340000	864360000	903040000	942780000
Q15149	PLEC_HUMAN	Plectin	PLEC	656880000	506450000	558620000	677820000	1936700000	1629300000	1942900000	1929800000	264510000	326600000	318030000	429570000	266230000	146540000	340120000	214520000
Q07065	CKAP4_HUMAN	Cytoskeleton-associated protein 4	CKAP4	934700000	698920000	852780000	835580000	554590000	685550000	640830000	855690000	4217200000	3901100000	4214200000	4113500000	3977100000	3875300000	3922400000	3408800000
Q71DI3	H32_HUMAN	Histone H3.2	H3C15	8979600000	10125000000	6494000000	4126400000	2571100000	3918200000	3644200000	4373800000	55938000000	54430000000	29274000000	23574000000	28684000000	11394000000	33173000000	27861000000
Q02878	RL6_HUMAN	60S ribosomal protein L6	RPL6	3384900000	4050200000	3559600000	3916300000	3551800000	3910000000	4209000000	3848600000	7139100000	8338900000	4454800000	6980900000	11841000000	9082700000	8215100000	6865500000
Q93079	H2B1H_HUMAN	Histone H2B type 1-H	H2BC9	3249900000	3163300000	2662500000	2304300000	1794800000	2791700000	2242100000	2701800000	14522000000	24096000000	16808000000	15901000000	18614000000	9103000000	14355000000	12625000000
P11021	BIP_HUMAN	Endoplasmic reticulum chaperone BiP	HSPA5	5379300000	4967400000	6150600000	5593000000	5701100000	5523400000	6123100000	6353500000	4146300000	6688700000	4829600000	4896000000	4814000000	6044000000	6267400000	5374300000
Q9P2E9	RRBP1_HUMAN	Ribosome-binding protein 1	RRBP1	761900000	750150000	767330000	865160000	557220000	624720000	715010000	810180000	449090000	226860000	53869000	288020000	46624000	17407000	98431000	14477000
P30101	PDIA3_HUMAN	Protein disulfide-isomerase A3	PDIA3	4515700000	4627900000	4605400000	4785600000	5044400000	4194800000	4712600000	4898700000	11395000000	11328000000	14631000000	11033000000	13330000000	13206000000	13374000000	12325000000
P36578	RL4_HUMAN	60S ribosomal protein L4	RPL4	3330200000	2972000000	3054300000	3501200000	3185500000	3295300000	3569500000	3358400000	5564900000	5755400000	4370900000	4730100000	4804700000	3649100000	4861800000	4238800000
P62917	RL8_HUMAN	60S ribosomal protein L8	RPL8	2438700000	2025000000	2125000000	2510800000	2368500000	2725100000	2511300000	2764000000	3907300000	8458500000	6042300000	6381600000	4002600000	1474000000	4322900000	3523200000
P18124	RL7_HUMAN	60S ribosomal protein L7	RPL7	4560400000	4849000000	4044700000	4111200000	3842700000	3735800000	3721700000	4224700000	8163800000	8328200000	9381100000	8787000000	6689800000	7347600000	8264800000	6178500000
P61247	RS3A_HUMAN	40S ribosomal protein S3a	RPS3A	4037800000	4012700000	3934800000	4415300000	3780500000	3995400000	4672700000	5015800000	6350100000	7044400000	8563700000	7540300000	8710600000	9675600000	8306600000	6180500000
P16403	H12_HUMAN	Histone H1.2	H1-2	2882200000	3043300000	2932100000	2679600000	2322000000	2263500000	2068000000	3261600000	19481000000	19715000000	16730000000	16742000000	10588000000	8018700000	14963000000	8799400000
P16615	AT2A2_HUMAN	Sarcoplasmic/endoplasmic reticulum calcium ATPase 2	ATP2A2	720510000	737860000	877800000	937070000	623820000	716350000	808320000	829560000	3770800000	3165200000	2329800000	3305500000	2382700000	3258600000	3772400000	3215000000
Q14204	DYHC1_HUMAN	Cytoplasmic dynein 1 heavy chain 1	DYNC1H1	3191100000	2859400000	3557700000	3525000000	3549200000	3447400000	3763400000	3813700000	4647900000	4675400000	4783300000	4266400000	4579400000	5176700000	5163500000	4191300000
P68371	TBB4B_HUMAN	Tubulin beta-4B chain	TUBB4B	9299100000	9588600000	8498700000	9169100000	9633300000	8979200000	9418000000	9125200000	6964600000	15699000000	15749000000	10506000000	21761000000	23920000000	21022000000	22299000000
P05141	ADT2_HUMAN	ADP/ATP translocase 2	SLC25A5	2754100000	2429600000	2284400000	2611500000	2888200000	2542900000	2791800000	2701100000	5359100000	7599800000	9278200000	5878200000	9719200000	11191000000	10655000000	10076000000
P25705	ATPA_HUMAN	ATP synthase subunit alpha, mitochondrial	ATP5F1A	4142100000	3763500000	4190000000	4129500000	3281800000	3625300000	3923800000	4036200000	4696500000	6699300000	6423500000	4641600000	8826100000	8833400000	5911400000	7413900000
P19338	NUCL_HUMAN	Nucleolin	NCL	5741600000	5404400000	6266800000	6092500000	4850100000	5448900000	4966300000	6522400000	8569900000	9631800000	9980600000	10535000000	17310000000	16090000000	13247000000	16847000000
P51572	BAP31_HUMAN	B-cell receptor-associated protein 31	BCAP31	395430000	479630000	479180000	452270000	505820000	444080000	502550000	579490000	1891700000	2966700000	2244500000	2447300000	731770000	955580000	2793700000	872980000
P62899	RL31_HUMAN	60S ribosomal protein L31	RPL31	897890000	1177300000	614700000	558470000	555920000	480500000	364080000	569510000	1709700000	2749300000	2188200000	2709100000	1138900000	857080000	1444800000	1063800000
P35579	MYH9_HUMAN	Myosin-9	MYH9	5089600000	4618700000	5000700000	5339300000	9148300000	9213900000	9457700000	9693100000	10979000000	14343000000	12348000000	10416000000	24206000000	21177000000	17230000000	18350000000
P10809	CH60_HUMAN	60 kDa heat shock protein, mitochondrial	HSPD1	7720100000	8364700000	9236800000	7776000000	7372500000	6792700000	7918800000	6840600000	2225100000	2125400000	1750300000	1778800000	3304100000	3647400000	2401100000	2621600000
P62280	RS11_HUMAN	40S ribosomal protein S11	RPS11	2181500000	1998900000	2010300000	2660400000	1564500000	1564500000	2067900000	2159200000	5492700000	5419500000	4257400000	6359400000	4844700000	5808100000	6349900000	4493900000
P40429	RL13A_HUMAN	60S ribosomal protein L13a	RPL13A	1714700000	1691000000	1552700000	1414700000	1829500000	1842800000	1685000000	1676700000	3276100000	3431800000	3957300000	2798100000	3181000000	2794400000	2582800000	3169400000
P39023	RL3_HUMAN	60S ribosomal protein L3	RPL3	2400200000	2388700000	1792400000	2405400000	2237700000	2007500000	2285900000	2485100000	4460600000	4343200000	4184100000	4349100000	5510100000	3176500000	5062500000	3799000000
P07237	PDIA1_HUMAN	Protein disulfide-isomerase	P4HB	1639600000	1706500000	1887500000	2057200000	1593800000	1493700000	1672200000	1650400000	2031000000	2548600000	2130800000	1892900000	1530900000	1587100000	1274400000	1531300000
P05556	ITB1_HUMAN	Integrin beta-1	ITGB1	657920000	523280000	560440000	559510000	761740000	684650000	820660000	815570000	1405900000	1286300000	724770000	1110700000	1424400000	1337300000	1020500000	1358600000
P26038	MOES_HUMAN	Moesin	MSN	1803100000	1580500000	1854000000	1495300000	1524600000	1622600000	1677700000	1586100000	881260000	1013800000	814920000	576330000	1750100000	1597600000	1650400000	1832300000
P15880	RS2_HUMAN	40S ribosomal protein S2	RPS2	3231000000	3183300000	3407100000	3636500000	2784500000	3249800000	3195400000	3129000000	5838500000	7273700000	10324000000	5683100000	9223700000	7605600000	6072000000	6054700000
P38646	GRP75_HUMAN	Stress-70 protein, mitochondrial	HSPA9	2791500000	2505300000	2331400000	2469000000	1896100000	2340000000	2277800000	2352600000	2076300000	1630400000	1364900000	1574300000	1163400000	653440000	1580500000	862500000
P18621	RL17_HUMAN	60S ribosomal protein L17	RPL17	1437400000	1148500000	1490900000	1541300000	1649800000	1612500000	1544800000	1349100000	1967100000	2687200000	2609500000	1974800000	1039300000	462900000	1331500000	882700000
P62277	RS13_HUMAN	40S ribosomal protein S13	RPS13	2465500000	2180100000	2548000000	2634800000	2235500000	2137200000	2460000000	2214300000	2254400000	3079000000	3547500000	2973700000	4714200000	5625200000	3065400000	4715100000
P02545	LMNA_HUMAN	Prelamin-A/C	LMNA	864210000	786110000	1034200000	1078800000	2324600000	2255700000	3198300000	2642300000	564960000	260990000	184790000	441960000	125590000	241500000	390780000	380720000
P47914	RL29_HUMAN	60S ribosomal protein L29	RPL29	606680000	657560000	569630000	639660000	754850000	903070000	781660000	726970000	2031700000	2915400000	1095300000	2290400000	467320000	0	417100000	46795000
Q9H0U4	RAB1B_HUMAN	Ras-related protein Rab-1B	RAB1B	1213600000	781510000	803780000	798150000	913660000	564100000	589210000	575610000	2179100000	3002900000	2023900000	2698300000	1811400000	1440500000	2358800000	1330000000
P14625	ENPL_HUMAN	Endoplasmin	HSP90B1	5290200000	4991000000	6275900000	5520000000	5114100000	4867100000	4944600000	5510100000	3798700000	5259300000	5451000000	4670800000	5459000000	5944000000	5421700000	4706500000
Q14764	MVP_HUMAN	Major vault protein	MVP	26362000	0	0	0	0	0	0	0	0	0	0	0	0	0	11431000	13468000
F8W7C6	F8W7C6_HUMAN	NA	RPL10	821470000	1029100000	981490000	692220000	645300000	864600000	748790000	1020200000	3061300000	3495200000	1902700000	2205700000	2102500000	1199000000	3692800000	2314200000
P07437	TBB5_HUMAN	Tubulin beta chain	TUBB	1858100000	1763300000	2590900000	2622200000	2879800000	3406600000	2793600000	2354000000	7537700000	10344000000	7081900000	3357700000	10099000000	8839700000	4972100000	3432100000
P40939	ECHA_HUMAN	Trifunctional enzyme subunit alpha, mitochondrial	HADHA	499260000	499600000	468700000	572290000	531160000	571080000	588630000	590700000	1322600000	1260000000	1012200000	1395300000	1371400000	1942000000	1564100000	1123800000
P04264	K2C1_HUMAN	Keratin, type II cytoskeletal 1	KRT1	6668100000	6746600000	3387800000	1334300000	5443200000	11072000000	5128600000	6070100000	10465000000	9451000000	9634700000	10009000000	4531800000	4247900000	5761400000	6289000000
P62750	RL23A_HUMAN	60S ribosomal protein L23a	RPL23A	1533300000	1177600000	1692000000	1351600000	906420000	868550000	1154900000	922310000	978760000	972750000	928410000	1056700000	663530000	478390000	533430000	557650000
P04843	RPN1_HUMAN	Dolichyl-diphosphooligosaccharide--protein glycosyltransferase subunit 1	RPN1	1403300000	1082600000	1260500000	1290600000	1018600000	1152400000	976610000	975980000	3898800000	4610500000	4182800000	2930000000	4718000000	5344600000	4413500000	4359200000
P61619	S61A1_HUMAN	Protein transport protein Sec61 subunit alpha isoform 1	SEC61A1	465520000	544140000	371210000	423230000	349650000	387200000	392280000	366820000	3048600000	1895100000	182670000	3327400000	106190000	46873000	1255300000	237810000
P06576	ATPB_HUMAN	ATP synthase subunit beta, mitochondrial	ATP5F1B	4387000000	3795200000	4235500000	3963900000	4785400000	4528400000	3518600000	4148500000	2220300000	2850400000	2808600000	2512600000	4005400000	4548300000	3507100000	3607000000
P46777	RL5_HUMAN	60S ribosomal protein L5	RPL5	2324300000	1883500000	2282200000	2503800000	2063800000	2198000000	2866100000	2635400000	2659300000	3889700000	4307600000	3125500000	3391100000	3793700000	2567000000	2526400000
Q01082	SPTB2_HUMAN	Spectrin beta chain, non-erythrocytic 1	SPTBN1	2221900000	2181800000	2438300000	2214200000	2074500000	1955400000	2217000000	2082000000	2184800000	2141400000	2040000000	1826800000	2788400000	2923100000	3386100000	2685200000
P50914	RL14_HUMAN	60S ribosomal protein L14	RPL14	1652800000	1589900000	1601600000	2056500000	1893000000	1725500000	2219500000	1606500000	4084700000	4002000000	5928500000	3844300000	7209000000	5036600000	5462800000	5964800000
P62424	RL7A_HUMAN	60S ribosomal protein L7a	RPL7A	3676300000	3241500000	3400700000	3745000000	2685000000	2700100000	3385900000	3829800000	5871000000	6461500000	6210100000	5955900000	6346600000	4400300000	7559100000	4834400000
G3V4W0	G3V4W0_HUMAN	NA	HNRNPC	4484500000	4127600000	3715500000	3685600000	3888400000	3322500000	3333400000	3689300000	6920100000	6765400000	8859700000	5722800000	5125200000	5940100000	6823200000	6442300000
P62753	RS6_HUMAN	40S ribosomal protein S6	RPS6	2763800000	2473700000	2488700000	2834300000	2372800000	2242700000	2245400000	2477600000	3062100000	3966600000	3474300000	2751700000	2935800000	3145300000	2065900000	2219300000
P68104	EF1A1_HUMAN	Elongation factor 1-alpha 1	EEF1A1	12480000000	14510000000	9613700000	10596000000	13900000000	14672000000	12990000000	18229000000	7597300000	6264500000	8402000000	5271500000	5966600000	5874000000	6440800000	5820900000
P62249	RS16_HUMAN	40S ribosomal protein S16	RPS16	3449900000	4057400000	3580300000	3766900000	3925500000	3225200000	3329300000	2893000000	2815400000	3896000000	4461100000	3552000000	9059600000	7034800000	5396000000	6662000000
P62805	H4_HUMAN	Histone H4	H4C1	12872000000	16580000000	13406000000	13916000000	13930000000	14091000000	15710000000	15256000000	20432000000	26446000000	40514000000	22739000000	94791000000	90032000000	57534000000	86249000000
P61254	RL26_HUMAN	60S ribosomal protein L26	RPL26	977570000	1559000000	779430000	970680000	931230000	1083800000	1070700000	1023100000	2560600000	3486300000	3442700000	2783100000	3602300000	5005800000	3165800000	2563700000
Q93077	H2A1C_HUMAN	Histone H2A type 1-C	H2AC6	11531000000	11846000000	8384000000	8335500000	13086000000	13155000000	7878800000	12677000000	28009000000	30555000000	34250000000	16743000000	22267000000	28819000000	20699000000	32159000000
P46781	RS9_HUMAN	40S ribosomal protein S9	RPS9	3810300000	4192000000	3243300000	3034100000	3410400000	3499900000	2873900000	3149100000	3243800000	5064200000	4931600000	3254500000	7915200000	8642700000	6475500000	6994300000
P26373	RL13_HUMAN	60S ribosomal protein L13	RPL13	3089400000	3595000000	3204300000	2854600000	2650300000	2554900000	2857400000	2956600000	4157100000	3468700000	3283900000	3728500000	2517500000	3074300000	3497900000	1574000000
P62841	RS15_HUMAN	40S ribosomal protein S15	RPS15	603670000	986840000	598220000	654470000	332700000	727450000	563330000	609560000	2864000000	3576900000	1977500000	1550500000	1734100000	45648000	2016600000	900980000
P62269	RS18_HUMAN	40S ribosomal protein S18	RPS18	2509000000	3644700000	2711300000	2619100000	1996300000	2540200000	2520600000	3214600000	6763300000	5863000000	2867000000	5362500000	4769800000	4342900000	4757200000	3854600000
Q07020	RL18_HUMAN	60S ribosomal protein L18	RPL18	2212900000	2795000000	2633800000	2948000000	2501900000	3164400000	2756200000	2795000000	3677000000	4407000000	5669700000	3647600000	4689100000	4926900000	3743400000	3982600000
Q02543	RL18A_HUMAN	60S ribosomal protein L18a	RPL18A	1016700000	1011200000	805370000	1127900000	934280000	1091100000	1051100000	1032400000	3247600000	4633000000	4626000000	2862900000	3420200000	2779900000	3648200000	3289500000
Q9BQE3	TBA1C_HUMAN	Tubulin alpha-1C chain	TUBA1C	16529000000	12774000000	12429000000	14430000000	16565000000	16986000000	15139000000	15190000000	7719800000	13548000000	9657900000	5594800000	24175000000	34421000000	18310000000	28983000000
P62701	RS4X_HUMAN	40S ribosomal protein S4, X isoform	RPS4X	2304200000	2699400000	2792200000	2955300000	2365400000	2232300000	2660800000	3115600000	4317900000	3910600000	5129800000	3750900000	5819500000	1749600000	8669000000	5456500000
P15144	AMPN_HUMAN	Aminopeptidase N	ANPEP	0	0	0	0	0	0	0	0	0	0	0	0	0	0	0	6356300
P46782	RS5_HUMAN	40S ribosomal protein S5	RPS5	1692300000	1601800000	1657700000	1350000000	1071000000	1291700000	1425100000	1374000000	5074300000	3230200000	1747000000	3774300000	334590000	421290000	2129100000	141410000
P49411	EFTU_HUMAN	Elongation factor Tu, mitochondrial	TUFM	1913700000	1798300000	1838400000	1840100000	1296700000	1464300000	1386100000	1617600000	1990000000	1685500000	1602900000	1899800000	1605700000	1133400000	1944900000	1650700000
P27797	CALR_HUMAN	Calreticulin	CALR	2452600000	2516200000	2873100000	2921500000	2194100000	2606300000	2282200000	2440100000	2966700000	4347100000	5147300000	2384600000	3437700000	1793500000	2072900000	2940700000
Q99623	PHB2_HUMAN	Prohibitin-2	PHB2	2193600000	2486400000	1352500000	1900500000	1952000000	1777700000	1539900000	1654300000	3550400000	3907300000	2985200000	3183500000	5960700000	6202500000	6181900000	6040100000
P08238	HS90B_HUMAN	Heat shock protein HSP 90-beta	HSP90AB1	20555000000	21523000000	23509000000	22208000000	21070000000	20242000000	22189000000	24189000000	6940800000	9941900000	9429600000	7301500000	5184100000	6242600000	5011200000	5370300000
P27105	STOM_HUMAN	Stomatin	STOM	53739000	52950000	61987000	83005000	0	0	0	0	1028400000	1076400000	1022400000	679710000	142610000	118530000	313520000	266050000
P21333	FLNA_HUMAN	Filamin-A	FLNA	7902500000	7340000000	9028000000	9373900000	13359000000	12897000000	16408000000	17014000000	1380200000	1261300000	975070000	1324700000	1174300000	1336700000	1345600000	1140500000
P78527	PRKDC_HUMAN	DNA-dependent protein kinase catalytic subunit	PRKDC	3617600000	2999600000	3168700000	3390100000	3014500000	2420300000	3526000000	1789300000	7807500000	8364500000	7383300000	6672000000	5964500000	6536900000	7309200000	5001100000
P45880	VDAC2_HUMAN	Voltage-dependent anion-selective channel protein 2	VDAC2	989330000	1343300000	1373100000	1561900000	1511200000	1458400000	1644800000	1802500000	3472000000	4226600000	4814700000	3825500000	4750100000	4429800000	4217000000	4748300000
P07996	TSP1_HUMAN	Thrombospondin-1	THBS1	3830200	12704000	0	0	4421200	21449000	19214000	19193000	0	0	0	0	0	0	4264300	10587000
P07355	ANXA2_HUMAN	Annexin A2	ANXA2	3476900000	2818200000	3400700000	3301100000	7392800000	7534100000	6636300000	6066400000	28210000	80478000	67064000	80572000	0	0	42598000	20128000
P13667	PDIA4_HUMAN	Protein disulfide-isomerase A4	PDIA4	2380700000	2433500000	2951200000	2410000000	2486000000	2384600000	2466500000	2262900000	2798000000	3968900000	3390700000	3592700000	2650300000	2230800000	2257000000	2446400000
Q00839	HNRPU_HUMAN	Heterogeneous nuclear ribonucleoprotein U	HNRNPU	3907600000	3751300000	4407400000	4944200000	4235400000	3987300000	5480000000	5197800000	4593100000	4998200000	3929200000	4357600000	3249100000	2448200000	2925000000	2759600000
P05023	AT1A1_HUMAN	Sodium/potassium-transporting ATPase subunit alpha-1	ATP1A1	1271500000	1256000000	1127800000	1473500000	1435200000	1376000000	1535300000	1470000000	4630300000	4656500000	5798700000	4557800000	7200400000	6414400000	6262500000	5320300000
P63244	RACK1_HUMAN	Receptor of activated protein C kinase 1	RACK1	4255700000	4577100000	4557700000	5203100000	4594000000	4080600000	4606100000	4779200000	3239300000	3501500000	4074600000	2749700000	2988300000	2372300000	1775300000	2212000000
P35527	K1C9_HUMAN	Keratin, type I cytoskeletal 9	KRT9	1855500000	1279600000	1187100000	473300000	1492300000	2811300000	1228000000	1091000000	2830000000	3212200000	4573600000	3156400000	2106000000	1396200000	1585200000	3310300000
P49755	TMEDA_HUMAN	Transmembrane emp24 domain-containing protein 10	TMED10	433890000	347330000	465500000	520660000	457710000	451990000	566260000	527760000	1696300000	2763600000	2399000000	2481300000	2940700000	3010400000	2397400000	2773100000
P50454	SERPH_HUMAN	Serpin H1	SERPINH1	3630800000	3567900000	4033700000	4188600000	3232100000	2956900000	3880900000	3410300000	3048800000	4047800000	5533200000	3233800000	3179000000	3501400000	3987800000	3532600000
P42704	LPPRC_HUMAN	Leucine-rich PPR motif-containing protein, mitochondrial	LRPPRC	2075300000	2001900000	1909100000	1850400000	1661500000	2103000000	1843800000	1936200000	2941300000	2574300000	2608100000	2692000000	2661900000	2751000000	3079800000	2234400000
P00367	DHE3_HUMAN	Glutamate dehydrogenase 1, mitochondrial	GLUD1	628710000	542700000	681220000	653020000	618350000	620110000	675650000	590010000	450580000	483350000	369140000	418680000	341190000	393520000	319770000	385310000
P21796	VDAC1_HUMAN	Voltage-dependent anion-selective channel protein 1	VDAC1	1639500000	1457200000	1764600000	1575400000	1448000000	1427800000	1665200000	1129500000	4792600000	6305400000	6716600000	4652700000	4546000000	7513700000	4603900000	5521200000
P02751	FINC_HUMAN	Fibronectin	FN1	4049900	0	21413000	3562400	3398300	4668800	2274400	2378300	0	0	10418000	0	0	0	3066300	2597900
P49207	RL34_HUMAN	60S ribosomal protein L34	RPL34	529510000	494250000	500940000	699380000	482920000	518450000	498490000	0	700090000	792580000	1332100000	955600000	598630000	559290000	457990000	309810000
P00505	AATM_HUMAN	Aspartate aminotransferase, mitochondrial	GOT2	1096100000	1128300000	1064500000	1478400000	887830000	1022900000	1140300000	1176000000	886680000	1262400000	1333400000	662540000	508380000	469440000	478610000	415100000
P16401	H15_HUMAN	Histone H1.5	H1-5	2145900000	2112800000	2385900000	2556100000	1624900000	2113600000	1881000000	1855900000	10036000000	11283000000	14479000000	12274000000	17018000000	11220000000	13253000000	10351000000
E7ETU9	E7ETU9_HUMAN	Procollagen-lysine 5-dioxygenase	PLOD2	3093600	0	0	0	2186300	0	1912000	0	0	0	0	0	0	0	5328600	4232300
Q9H3N1	TMX1_HUMAN	Thioredoxin-related transmembrane protein 1	TMX1	256620000	293120000	290640000	359230000	315350000	277000000	446790000	191870000	1856900000	1724000000	1309800000	1384200000	1869400000	1482100000	1260800000	1114700000
P17301	ITA2_HUMAN	Integrin alpha-2	ITGA2	6111200	0	0	0	26291000	21442000	91826000	17411000	32822000	0	0	29274000	0	0	37212000	16186000
P27824	CALX_HUMAN	Calnexin	CANX	983710000	629890000	934060000	785060000	825620000	768620000	680780000	682720000	1049300000	1205000000	1803500000	1402200000	2368900000	3209600000	2281800000	2809200000
P62979	RS27A_HUMAN	Ubiquitin-40S ribosomal protein S27a	RPS27A	1889500000	2564500000	2804300000	2973700000	2057200000	2154600000	2270900000	1943200000	1413500000	1558900000	1160500000	1614200000	277810000	368620000	1835500000	716770000
P12111	CO6A3_HUMAN	Collagen alpha-3(VI) chain	COL6A3	41806000	0	0	0	59447000	0	0	0	0	0	0	0	0	0	16821000	0
P63000	RAC1_HUMAN	Ras-related C3 botulinum toxin substrate 1	RAC1	595240000	540770000	676240000	731270000	540430000	664920000	784350000	683830000	1622400000	1757600000	2051400000	1044800000	1948500000	1027100000	1758600000	1750100000
Q00325	MPCP_HUMAN	Phosphate carrier protein, mitochondrial	SLC25A3	702670000	514730000	462890000	519500000	724880000	567210000	615790000	513500000	2160000000	1732900000	3095700000	4261700000	3502200000	3981100000	2853500000	3850900000
Q03135	CAV1_HUMAN	Caveolin-1	CAV1	60880000	0	103330000	137680000	190600000	212520000	242290000	151240000	0	0	0	0	0	0	0	0
P05388	RLA0_HUMAN	60S acidic ribosomal protein P0	RPLP0	1961000000	1697300000	1595200000	1469700000	2070000000	1651600000	1421400000	1274100000	2059900000	2892700000	2553200000	2759000000	2773300000	3244100000	2826600000	2522000000
Q13443	ADAM9_HUMAN	Disintegrin and metalloproteinase domain-containing protein 9	ADAM9	0	0	0	0	0	0	0	0	0	0	0	0	0	0	31069000	0
O00159	MYO1C_HUMAN	Unconventional myosin-Ic	MYO1C	188650000	56363000	230130000	199650000	244340000	258360000	323050000	317390000	551260000	659110000	637890000	613270000	327320000	390410000	659530000	410510000
Q12906	ILF3_HUMAN	Interleukin enhancer-binding factor 3	ILF3	2623600000	2269800000	2804300000	3191800000	2769600000	2509900000	2796400000	2769500000	5683000000	6240900000	6986200000	5706200000	7348400000	5953400000	6043800000	6445500000
P11940	PABP1_HUMAN	Polyadenylate-binding protein 1	PABPC1	2632600000	2402900000	2399700000	2346300000	2468800000	2332600000	2064400000	2178100000	2241000000	2949100000	3673900000	2159800000	5128000000	5303200000	4516000000	4966500000
P61313	RL15_HUMAN	60S ribosomal protein L15	RPL15	1193800000	789350000	1179900000	1321000000	986640000	909900000	1393200000	1404600000	1801200000	5594300000	3717700000	2195000000	7083800000	1711900000	3789900000	4565000000
Q70UQ0	IKIP_HUMAN	Inhibitor of nuclear factor kappa-B kinase-interacting protein	IKBIP	24926000	0	0	11108000	0	38085000	0	22607000	0	58054000	51821000	0	49066000	46248000	11696000	36730000
P62906	RL10A_HUMAN	60S ribosomal protein L10a	RPL10A	2474500000	2495500000	2623900000	3081200000	2669500000	2398800000	2605000000	2953400000	1816200000	2200000000	2329300000	1407800000	7359200000	8855700000	6888000000	8291100000
P62241	RS8_HUMAN	40S ribosomal protein S8	RPS8	2297100000	1919300000	2905800000	1689200000	1702000000	1636100000	1652500000	1924400000	2265400000	2950400000	3417100000	2527000000	4063200000	3914800000	5129400000	5076700000
Q96CW1	AP2M1_HUMAN	AP-2 complex subunit mu	AP2M1	131330000	149790000	154680000	129490000	195680000	167680000	186300000	165560000	532110000	603450000	779460000	578860000	753260000	561890000	614460000	557180000
P53621	COPA_HUMAN	Coatomer subunit alpha	COPA	934390000	848190000	864860000	986730000	680060000	907500000	1012000000	931330000	1174400000	1111100000	867620000	1201300000	1718500000	2097000000	1573300000	1785000000
Q8TCT9	HM13_HUMAN	Minor histocompatibility antigen H13	HM13	69924000	55175000	122030000	146390000	99367000	71192000	122700000	104300000	538990000	573540000	572360000	483330000	500590000	641500000	674900000	335050000
P55060	XPO2_HUMAN	Exportin-2	CSE1L	4239200000	5302400000	5916800000	4245300000	3828800000	3399600000	3553400000	3572200000	3220200000	3720900000	2101800000	2729900000	1449200000	1197700000	1285000000	1050600000
P11279	LAMP1_HUMAN	Lysosome-associated membrane glycoprotein 1	LAMP1	295390000	331070000	285820000	458000000	332740000	379600000	308920000	304330000	1059400000	0	0	819220000	135880000	557360000	532170000	640590000
Q9NX63	MIC19_HUMAN	MICOS complex subunit MIC19	CHCHD3	291330000	253140000	244980000	272120000	211530000	217670000	340480000	290720000	1763600000	2009600000	1767100000	2300500000	1147000000	121380000	1911700000	772560000
P51149	RAB7A_HUMAN	Ras-related protein Rab-7a	RAB7A	554110000	525120000	551670000	579130000	654320000	708580000	610170000	684850000	1845400000	2135600000	2540200000	1847900000	2395400000	2052900000	1700300000	1842300000
P62873	GBB1_HUMAN	Guanine nucleotide-binding protein G(I)/G(S)/G(T) subunit beta-1	GNB1	353880000	459450000	450800000	500610000	415670000	435320000	546910000	476780000	1792200000	1879000000	1372400000	1626400000	2116100000	1470600000	2058200000	2005000000
P67809	YBOX1_HUMAN	Y-box-binding protein 1	YBX1	1150500000	1214600000	1915300000	2065600000	1290100000	1406800000	1937400000	1678200000	2757600000	2292000000	2804800000	1911900000	2191500000	638000000	3052100000	1184300000
P11717	MPRI_HUMAN	Cation-independent mannose-6-phosphate receptor	IGF2R	249030000	177360000	152210000	225830000	223120000	228520000	238200000	234770000	2166400000	1444400000	1446300000	1763200000	2027200000	1771900000	2540000000	1365000000
Q12797	ASPH_HUMAN	Aspartyl/asparaginyl beta-hydroxylase	ASPH	30691000	0	17317000	0	0	19418000	14517000	0	74874000	115520000	87324000	136270000	372500000	373820000	304130000	385890000
Q92616	GCN1_HUMAN	eIF-2-alpha kinase activator GCN1	GCN1	792960000	873820000	883620000	768620000	897820000	790200000	877980000	897380000	1325200000	1426800000	1257900000	1236800000	1100800000	1097500000	1175500000	1002400000
P46779	RL28_HUMAN	60S ribosomal protein L28	RPL28	326180000	434650000	163680000	241110000	235550000	292370000	426940000	264280000	1292000000	1531600000	483510000	1073400000	524520000	309830000	847260000	331770000
P23284	PPIB_HUMAN	Peptidyl-prolyl cis-trans isomerase B	PPIB	2090000000	1678400000	1703500000	1888800000	1729400000	1680300000	1608300000	1480000000	914670000	1214000000	1309200000	1018700000	2611200000	3223900000	2332600000	2967400000
P13645	K1C10_HUMAN	Keratin, type I cytoskeletal 10	KRT10	2400400000	7088400000	1939100000	1476000000	3985900000	6868200000	3323400000	5811300000	11503000000	10998000000	10199000000	8842800000	6102800000	5231000000	8220900000	7727000000
Q9NZM1	MYOF_HUMAN	Myoferlin	MYOF	28058000	8774500	11973000	18229000	97194000	163440000	221360000	221090000	0	6112300	0	0	0	0	3534700	5595100
Q00610	CLH1_HUMAN	Clathrin heavy chain 1	CLTC	3065800000	3520400000	3538500000	3381700000	3437400000	3521500000	3706500000	3596900000	1409600000	669280000	773150000	1088000000	1433900000	2253000000	1714600000	1830700000
P18077	RL35A_HUMAN	60S ribosomal protein L35a	RPL35A	607220000	727920000	667770000	709070000	893010000	716200000	697280000	858180000	2056400000	1435000000	1536600000	1278300000	1427400000	1057600000	1479000000	951330000
P11142	HSP7C_HUMAN	Heat shock cognate 71 kDa protein	HSPA8	13770000000	14749000000	15556000000	15334000000	14864000000	14441000000	13135000000	13877000000	3585100000	5909500000	5127500000	3180000000	3612000000	3743300000	3182700000	3235900000
Q10471	GALT2_HUMAN	Polypeptide N-acetylgalactosaminyltransferase 2	GALNT2	136390000	143820000	179370000	149820000	160520000	141360000	134180000	113090000	1073600000	710470000	464550000	534240000	315580000	541060000	811920000	439150000
P49748	ACADV_HUMAN	Very long-chain specific acyl-CoA dehydrogenase, mitochondrial	ACADVL	166340000	103850000	118200000	117140000	149040000	120830000	136710000	126040000	105110000	158330000	119420000	151390000	125140000	183630000	243680000	170030000
P61353	RL27_HUMAN	60S ribosomal protein L27	RPL27	2147600000	1920500000	2291200000	2373300000	2017000000	2165800000	2166800000	2253700000	2602400000	3260200000	3867200000	3947400000	6017900000	5554500000	3873300000	4751000000
Q08211	DHX9_HUMAN	ATP-dependent RNA helicase A	DHX9	2229400000	1979200000	2505800000	2244600000	1917000000	1816700000	2055500000	2098700000	1221500000	1410300000	1650900000	1125200000	2128600000	2404400000	1846800000	1988300000
P60709	ACTB_HUMAN	Actin, cytoplasmic 1	ACTB	0	121570000	221950000	192690000	349260000	374380000	593920000	249920000	467730000	1295200000	0	574540000	0	0	274900000	0
Q9Y3U8	RL36_HUMAN	60S ribosomal protein L36	RPL36	940240000	964360000	427270000	752210000	621010000	897090000	730760000	651390000	836660000	1027900000	1354600000	1025800000	724940000	950810000	713170000	832740000
Q09666	AHNK_HUMAN	Neuroblast differentiation-associated protein AHNAK	AHNAK	34148000	2093600	10446000	20078000	610580000	523980000	861550000	437970000	1511300	0	17210000	0	0	0	2157600	1992100
P07814	SYEP_HUMAN	Bifunctional glutamate/proline--tRNA ligase	EPRS1	1412600000	1562100000	1726400000	1916400000	1176200000	1249100000	1500400000	1402700000	1126700000	504660000	778200000	1082400000	425710000	349330000	540830000	416200000
Q86UE4	LYRIC_HUMAN	Protein LYRIC	MTDH	92714000	58313000	124130000	149210000	172530000	155680000	116340000	130350000	95893000	97076000	63808000	0	0	0	69248000	37670000
P48047	ATPO_HUMAN	ATP synthase subunit O, mitochondrial	ATP5PO	812200000	787740000	1120200000	747420000	1111700000	698710000	963340000	1135200000	2554000000	2918000000	2804600000	3240000000	3583800000	2674800000	2770000000	3601000000
P55084	ECHB_HUMAN	Trifunctional enzyme subunit beta, mitochondrial	HADHB	207270000	135810000	219650000	212840000	329720000	185390000	254000000	205320000	1147600000	871240000	1045400000	1127200000	1271600000	979630000	902010000	896970000
P42677	RS27_HUMAN	40S ribosomal protein S27	RPS27	717980000	792090000	839560000	1026500000	541840000	608550000	794580000	576090000	1242500000	1559400000	1215100000	1228000000	646000000	300400000	824950000	453600000
Q14697	GANAB_HUMAN	Neutral alpha-glucosidase AB	GANAB	1683500000	1765800000	1813400000	1729400000	1403700000	1451100000	1601600000	1682500000	2445500000	1939800000	2614900000	2659700000	3869200000	3886700000	4108900000	3257300000
O75533	SF3B1_HUMAN	Splicing factor 3B subunit 1	SF3B1	822660000	712160000	950170000	1043700000	837540000	724130000	933400000	767530000	1393000000	1191800000	1254900000	1138300000	1378500000	1639900000	1222800000	1200200000
Q15907	RB11B_HUMAN	Ras-related protein Rab-11B	RAB11B	879330000	1247500000	1280300000	1043600000	1626200000	1156300000	926720000	1060300000	1403700000	1906600000	2076700000	1267400000	2050800000	2262600000	2229900000	2161100000
P62854	RS26_HUMAN	40S ribosomal protein S26	RPS26	811990000	892170000	631690000	775120000	886130000	798690000	842070000	672420000	1454300000	1094300000	0	185490000	0	311170000	1091800000	587490000
Q16891	MIC60_HUMAN	MICOS complex subunit MIC60	IMMT	557470000	561890000	717300000	629170000	554420000	555340000	568510000	598080000	2256900000	2255200000	2151000000	1518400000	1520500000	1579200000	1651100000	1384700000
P40926	MDHM_HUMAN	Malate dehydrogenase, mitochondrial	MDH2	1199000000	1321100000	964410000	1038100000	1418400000	1300600000	979310000	1007200000	371630000	630120000	655510000	363670000	736730000	624240000	645720000	519620000
P30050	RL12_HUMAN	60S ribosomal protein L12	RPL12	1191700000	1424300000	953020000	1266600000	1137400000	1174300000	1368100000	1546800000	1542600000	2158700000	2922900000	1251000000	1810200000	1554500000	1372300000	902650000
P62263	RS14_HUMAN	40S ribosomal protein S14	RPS14	915570000	1296600000	1063900000	1271500000	1169300000	1123100000	1212900000	1344300000	837050000	1307000000	1993900000	868130000	2475400000	2632300000	3060300000	2371600000
P46940	IQGA1_HUMAN	Ras GTPase-activating-like protein IQGAP1	IQGAP1	1078400000	1151000000	1354400000	1353200000	1024500000	1018300000	1037500000	1063300000	1008700000	853070000	925120000	1144900000	772930000	718350000	721490000	587260000
P20340	RAB6A_HUMAN	Ras-related protein Rab-6A	RAB6A	540550000	498380000	579310000	538090000	460330000	448100000	583610000	514850000	1431700000	1606000000	1814600000	1669200000	1996600000	1665400000	1668700000	1599400000
P09669	COX6C_HUMAN	Cytochrome c oxidase subunit 6C	COX6C	210880000	225200000	250920000	235270000	127880000	140220000	226090000	184750000	977610000	530570000	195210000	809990000	393220000	589860000	869810000	575690000
P20700	LMNB1_HUMAN	Lamin-B1	LMNB1	1566800000	1416200000	1746700000	1934700000	1343000000	1362500000	1630100000	1820800000	4104500000	3940800000	3751500000	3928200000	2467100000	980010000	2679700000	2294200000
P09622	DLDH_HUMAN	Dihydrolipoyl dehydrogenase, mitochondrial	DLD	209340000	173040000	173680000	176460000	182310000	157940000	166770000	176800000	150010000	157510000	110280000	0	160800000	0	171740000	151430000
Q9BVA1	TBB2B_HUMAN	Tubulin beta-2B chain	TUBB2B	2091700000	2339500000	2182100000	2033800000	3774000000	3710200000	3168600000	2982100000	1782800000	3010100000	2555400000	1400500000	5265700000	5539000000	5357100000	4597100000
P05121	PAI1_HUMAN	Plasminogen activator inhibitor 1	SERPINE1	0	0	0	0	108160000	0	63984000	52689000	0	0	0	0	0	0	50792000	0
Q9NR30	DDX21_HUMAN	Nucleolar RNA helicase 2	DDX21	1766800000	1420100000	1491300000	1633100000	1374400000	1353000000	1540700000	1527000000	1438200000	1579000000	1684900000	1368400000	1461000000	1580800000	1234900000	1486700000
P84098	RL19_HUMAN	60S ribosomal protein L19	RPL19	470660000	738630000	449500000	235980000	167370000	192100000	254330000	224850000	4428000000	1159500000	500070000	1999100000	549970000	296960000	1992100000	549370000
P34897	GLYM_HUMAN	Serine hydroxymethyltransferase, mitochondrial	SHMT2	1288100000	1237900000	1234300000	1229200000	1485800000	1493500000	1473500000	1529900000	731770000	842360000	810830000	630070000	950790000	798520000	682020000	773480000
Q86UP2	KTN1_HUMAN	Kinectin	KTN1	210920000	143410000	283100000	203410000	176610000	222940000	153560000	245350000	0	0	21479000	0	0	0	9128700	0
P62081	RS7_HUMAN	40S ribosomal protein S7	RPS7	2571300000	2587300000	2562900000	2096100000	1380600000	1903300000	1362800000	2404400000	1432400000	1405600000	328530000	1192300000	341950000	372630000	1111900000	344960000
P61978	HNRPK_HUMAN	Heterogeneous nuclear ribonucleoprotein K	HNRNPK	4894300000	4815100000	4945500000	4722000000	3767300000	3875100000	3887300000	3654600000	3134900000	3461400000	3095800000	2803400000	1670600000	1079700000	2543700000	1466600000
P46776	RL27A_HUMAN	60S ribosomal protein L27a	RPL27A	428850000	698090000	436680000	503180000	544420000	630690000	525050000	644740000	560310000	810250000	969890000	736470000	853700000	614270000	607470000	1170300000
Q92896	GSLG1_HUMAN	Golgi apparatus protein 1	GLG1	308120000	165660000	281310000	263700000	171000000	187660000	290150000	191620000	1847300000	1674800000	2544100000	1491400000	2887700000	2595200000	2058700000	2385600000
Q96AG4	LRC59_HUMAN	Leucine-rich repeat-containing protein 59	LRRC59	413650000	305880000	474430000	430670000	330940000	341600000	348300000	264220000	484930000	738370000	657380000	308520000	1036500000	1562900000	485470000	1000900000
P16070	CD44_HUMAN	CD44 antigen	CD44	0	0	0	0	39418000	48340000	32000000	0	0	0	0	0	0	0	0	0
Q53EP0	FND3B_HUMAN	Fibronectin type III domain-containing protein 3B	FNDC3B	6373000	0	0	0	0	0	0	0	16367000	0	0	28456000	0	0	10979000	32335000
P35606	COPB2_HUMAN	Coatomer subunit beta'	COPB2	651860000	595830000	684640000	684350000	525800000	445200000	608600000	567940000	888700000	1069100000	845940000	846560000	1056600000	886290000	722690000	727330000
P63010	AP2B1_HUMAN	AP-2 complex subunit beta	AP2B1	536940000	504240000	638860000	600380000	562140000	473710000	571090000	490840000	734110000	609060000	669960000	625010000	651900000	440140000	533250000	425370000
O75390	CISY_HUMAN	Citrate synthase, mitochondrial	CS	279600000	261360000	374370000	260470000	377070000	392910000	341070000	461590000	279170000	266900000	294510000	246470000	258280000	297610000	241750000	269200000
Q969X5	ERGI1_HUMAN	Endoplasmic reticulum-Golgi intermediate compartment protein 1	ERGIC1	46278000	49541000	51300000	57219000	57550000	48381000	49729000	55549000	291370000	385900000	349510000	290130000	388350000	411510000	224180000	381090000
P13073	COX41_HUMAN	Cytochrome c oxidase subunit 4 isoform 1, mitochondrial	COX4I1	495620000	625220000	587780000	650950000	571010000	487950000	595720000	523450000	981970000	1002200000	1134100000	932470000	1192300000	458520000	732730000	764070000
P42766	RL35_HUMAN	60S ribosomal protein L35	RPL35	1568500000	1949200000	1816600000	1703600000	1203300000	1038300000	1348900000	1565600000	1335600000	1572600000	2023800000	1551900000	1612600000	982680000	2079100000	1628100000
Q5JPE7	NOMO2_HUMAN	Nodal modulator 2	NOMO2	230110000	273310000	253820000	201400000	167330000	165060000	187050000	163840000	836900000	1144100000	1061600000	749370000	600490000	601640000	597600000	595700000
Q9NQC3	RTN4_HUMAN	Reticulon-4	RTN4	759600000	648800000	563930000	864270000	1085700000	1056300000	1143900000	909220000	353440000	339800000	537120000	501600000	869220000	988200000	804560000	653370000
P62266	RS23_HUMAN	40S ribosomal protein S23	RPS23	334480000	379590000	302500000	478840000	308060000	349640000	573070000	322790000	429520000	517540000	516100000	434490000	0	0	668240000	100500000
O95202	LETM1_HUMAN	Mitochondrial proton/calcium exchanger protein	LETM1	125950000	75072000	105900000	137260000	157410000	124200000	144590000	151420000	509730000	530460000	654480000	518730000	301630000	258200000	921450000	630530000
Q9BUF5	TBB6_HUMAN	Tubulin beta-6 chain	TUBB6	257640000	155620000	215980000	265470000	319260000	352930000	251420000	294280000	202590000	329440000	171050000	235730000	144730000	196570000	259810000	195760000
Q9HD45	TM9S3_HUMAN	Transmembrane 9 superfamily member 3	TM9SF3	130100000	131520000	82698000	113480000	73166000	106210000	105950000	97412000	1007800000	721430000	840870000	821210000	600500000	668700000	829870000	659580000
Q07954	LRP1_HUMAN	Prolow-density lipoprotein receptor-related protein 1	LRP1	108790000	70008000	98663000	96394000	51353000	66197000	104990000	94911000	730060000	561820000	488110000	586230000	509110000	772350000	807000000	509530000
O75396	SC22B_HUMAN	Vesicle-trafficking protein SEC22b	SEC22B	71351000	0	0	42725000	0	83768000	56690000	75861000	78072000	71843000	0	135050000	0	117740000	198710000	101970000
Q02809	PLOD1_HUMAN	Procollagen-lysine,2-oxoglutarate 5-dioxygenase 1	PLOD1	88495000	46832000	85696000	110150000	51905000	69151000	96968000	66434000	152020000	142130000	93775000	145480000	129680000	86743000	214160000	66204000
Q9Y678	COPG1_HUMAN	Coatomer subunit gamma-1	COPG1	233480000	200480000	280390000	279800000	170790000	195590000	239540000	248480000	237210000	145020000	96980000	158160000	80320000	144250000	174400000	185450000
P49257	LMAN1_HUMAN	Protein ERGIC-53	LMAN1	142750000	168490000	298190000	241650000	189040000	139620000	239590000	146620000	958070000	1224700000	1358900000	834050000	1686100000	1498100000	1152800000	1542900000
O15269	SPTC1_HUMAN	Serine palmitoyltransferase 1	SPTLC1	115760000	132340000	129750000	143830000	149080000	52936000	156870000	158020000	498530000	788850000	828860000	380600000	118840000	29309000	795720000	177170000
P02786	TFR1_HUMAN	Transferrin receptor protein 1	TFRC	620650000	577960000	632410000	784700000	639090000	474570000	528790000	476330000	700830000	975740000	799560000	927500000	622560000	972070000	828350000	819300000
P52272	HNRPM_HUMAN	Heterogeneous nuclear ribonucleoprotein M	HNRNPM	3419400000	3228700000	4254500000	3608800000	3325000000	3255200000	3516100000	3530200000	4252600000	4182900000	3067100000	4296800000	3799400000	4194600000	4717700000	3951600000
P04406	G3P_HUMAN	Glyceraldehyde-3-phosphate dehydrogenase	GAPDH	13150000000	16021000000	15706000000	15619000000	10225000000	12324000000	13302000000	13719000000	1861700000	463440000	1366300000	1151200000	680120000	560850000	1317100000	1077200000
P04899	GNAI2_HUMAN	Guanine nucleotide-binding protein G(i) subunit alpha-2	GNAI2	561640000	485660000	483880000	570270000	641700000	707120000	673380000	665290000	1214500000	1162300000	1880500000	1832400000	2500800000	1997800000	1925800000	1836200000
Q13509	TBB3_HUMAN	Tubulin beta-3 chain	TUBB3	518160000	485840000	638470000	539680000	522820000	698630000	1011500000	1016300000	294530000	220800000	179430000	225650000	112990000	820020000	938200000	840350000
Q15005	SPCS2_HUMAN	Signal peptidase complex subunit 2	SPCS2	163120000	119740000	230250000	253620000	243430000	198750000	169420000	155860000	992530000	757940000	196950000	639770000	351390000	377310000	1313000000	247250000
P62244	RS15A_HUMAN	40S ribosomal protein S15a	RPS15A	1793700000	1565000000	1468100000	1926700000	1492500000	1413000000	1357100000	1445600000	2865300000	2369400000	3035600000	2061600000	3824000000	4476100000	3555000000	3377200000
A0A0D9SF54	A0A0D9SF54_HUMAN	NA	SPTAN1	1703200000	1553900000	2329600000	2578200000	2147900000	2104700000	2318600000	1682200000	1500400000	1498400000	1419900000	1200000000	1131100000	613040000	1060600000	771470000
Q99442	SEC62_HUMAN	Translocation protein SEC62	SEC62	66338000	51471000	0	0	73873000	0	0	0	440400000	387980000	405670000	322640000	0	0	177340000	98179000
P28331	NDUS1_HUMAN	NADH-ubiquinone oxidoreductase 75 kDa subunit, mitochondrial	NDUFS1	349520000	335970000	415980000	357190000	269940000	259450000	308700000	269260000	761100000	809590000	1052800000	718310000	975780000	973460000	1099200000	802200000
P39019	RS19_HUMAN	40S ribosomal protein S19	RPS19	1495500000	1536200000	1464200000	1739600000	1796900000	1652400000	1618100000	1799800000	1124400000	1910200000	2349400000	1530100000	1688300000	1832700000	1677500000	2109900000
P68032	ACTC_HUMAN	Actin, alpha cardiac muscle 1	ACTC1	2065300000	1555200000	1503700000	1577300000	4081500000	3476600000	2516600000	2284600000	469250000	1125000000	772860000	266330000	1386200000	929090000	1028300000	873650000
P11233	RALA_HUMAN	Ras-related protein Ral-A	RALA	243720000	188480000	253890000	256700000	175560000	223330000	253020000	260420000	801200000	692210000	819390000	898920000	1817400000	1203200000	1731200000	1298600000
Q9Y3I0	RTCB_HUMAN	RNA-splicing ligase RtcB homolog	RTCB	590070000	514750000	560060000	584720000	491070000	533940000	567850000	499480000	556120000	518250000	469610000	523050000	235740000	286330000	252450000	238410000
P12236	ADT3_HUMAN	ADP/ATP translocase 3	SLC25A6	581800000	559510000	518770000	844880000	717100000	666860000	820150000	661460000	843390000	1060700000	735420000	1287500000	1840700000	2140200000	1669300000	1532000000
P62913	RL11_HUMAN	60S ribosomal protein L11	RPL11	297140000	718680000	769730000	612730000	459070000	442040000	476020000	609470000	1670700000	2090000000	1772400000	1642300000	1158100000	1182300000	1121700000	1430100000
P31930	QCR1_HUMAN	Cytochrome b-c1 complex subunit 1, mitochondrial	UQCRC1	346870000	281980000	313010000	311880000	299130000	259070000	235450000	286310000	894810000	706230000	719000000	509560000	1616300000	1954700000	1057700000	1458900000
O00571	DDX3X_HUMAN	ATP-dependent RNA helicase DDX3X	DDX3X	848110000	686980000	1037600000	1031900000	765280000	714780000	945720000	883130000	1160500000	1448200000	1085000000	1110500000	657130000	453650000	695420000	548890000
Q12907	LMAN2_HUMAN	Vesicular integral-membrane protein VIP36	LMAN2	152430000	76582000	199220000	151710000	156120000	140950000	131840000	142410000	736430000	930770000	665460000	731700000	1037700000	947050000	1038900000	786900000
O94905	ERLN2_HUMAN	Erlin-2	ERLIN2	249310000	211150000	186770000	222770000	97955000	62651000	172330000	160790000	986300000	988770000	1072600000	1162700000	1503400000	1564100000	1834400000	1140900000
P05783	K1C18_HUMAN	Keratin, type I cytoskeletal 18	KRT18	2832500000	2523900000	2796300000	2800000000	3794200000	3474600000	4962800000	4798500000	3108400000	3133200000	2875300000	3063600000	4439200000	3789800000	4420400000	2954400000
P51659	DHB4_HUMAN	Peroxisomal multifunctional enzyme type 2	HSD17B4	1310500000	1414000000	1271000000	1231000000	831030000	875380000	960180000	1101000000	3639500000	4289500000	4612600000	3306600000	4204200000	5480100000	5672000000	5088500000
P07900	HS90A_HUMAN	Heat shock protein HSP 90-alpha	HSP90AA1	6043700000	4734900000	6627600000	6562300000	6022500000	5427200000	6609400000	5961900000	2123800000	1649600000	2004700000	1464700000	791300000	872980000	740110000	690860000
P17987	TCPA_HUMAN	T-complex protein 1 subunit alpha	TCP1	2555100000	2396200000	2839600000	2468700000	1999900000	2385000000	2313900000	2322100000	830060000	1066000000	620290000	908380000	656320000	699030000	674230000	584480000
O43852	CALU_HUMAN	Calumenin	CALU	235030000	189910000	317080000	225200000	171540000	223460000	169000000	160630000	240340000	225400000	232500000	190480000	185100000	62292000	131190000	61887000
Q13724	MOGS_HUMAN	Mannosyl-oligosaccharide glucosidase	MOGS	157380000	158040000	164230000	114660000	117700000	106230000	169210000	107770000	446500000	423090000	551060000	300310000	898010000	915270000	552690000	861050000
Q9Y4W6	AFG32_HUMAN	AFG3-like protein 2	AFG3L2	184660000	243070000	219490000	180520000	218490000	187250000	138100000	91673000	945120000	1154900000	1372200000	1031000000	1326100000	1013700000	1273000000	1013500000
P60953	CDC42_HUMAN	Cell division control protein 42 homolog	CDC42	148650000	148050000	97974000	148050000	130640000	133940000	197180000	186960000	237390000	562100000	0	319740000	1180500000	109950000	433670000	764530000
P61224	RAP1B_HUMAN	Ras-related protein Rap-1b	RAP1B	301300000	233320000	342970000	287540000	288650000	264270000	238520000	223050000	782560000	960770000	960900000	808420000	633460000	538360000	523870000	578410000
Q14974	IMB1_HUMAN	Importin subunit beta-1	KPNB1	2011800000	2393800000	2639300000	2836300000	2137600000	2183100000	2521400000	2280500000	750590000	624420000	638310000	545270000	355440000	117490000	205500000	168100000
P62826	RAN_HUMAN	GTP-binding nuclear protein Ran	RAN	2545400000	2784200000	2605200000	3109200000	2706000000	2673300000	2949300000	3219800000	2994700000	3783700000	4775700000	2969600000	2990800000	2466000000	2375900000	2790400000
P19367	HXK1_HUMAN	Hexokinase-1	HK1	1092700000	1090100000	1217200000	1242300000	1112700000	916250000	1016200000	996710000	2004400000	1573700000	1973500000	1723200000	1492100000	1252400000	1183400000	1176000000
P07195	LDHB_HUMAN	L-lactate dehydrogenase B chain	LDHB	7811500000	7658000000	7176500000	6954100000	7465800000	7050100000	6584500000	6702400000	1393400000	1239500000	1138800000	1153700000	695320000	310250000	754680000	580530000
O75369	FLNB_HUMAN	Filamin-B	FLNB	2817300000	2966000000	3106400000	3822000000	4296000000	4260300000	5012000000	4613000000	189010000	105340000	114070000	125100000	40035000	73057000	124330000	44477000
Q15070	OXA1L_HUMAN	Mitochondrial inner membrane protein OXA1L	OXA1L	106200000	0	64938000	54402000	0	0	0	58625000	408060000	257950000	310710000	331250000	312330000	51381000	408350000	233780000
O95782	AP2A1_HUMAN	AP-2 complex subunit alpha-1	AP2A1	401430000	277330000	349540000	405390000	544850000	396050000	471190000	373440000	472200000	434620000	483440000	340740000	696950000	772450000	680270000	638340000
O00461	GOLI4_HUMAN	Golgi integral membrane protein 4	GOLIM4	50678000	62482000	0	0	0	0	22102000	46692000	219230000	110710000	204050000	295070000	175190000	171970000	171080000	141080000
P39656	OST48_HUMAN	Dolichyl-diphosphooligosaccharide--protein glycosyltransferase 48 kDa subunit	DDOST	538010000	433740000	429970000	406180000	452150000	337830000	328760000	370720000	1149500000	1391200000	1967300000	1258900000	2508400000	2643600000	1503100000	2056600000
Q9Y2X3	NOP58_HUMAN	Nucleolar protein 58	NOP58	453640000	503510000	478640000	468820000	375490000	314540000	418990000	484070000	1042200000	1234300000	1414500000	1074300000	1174700000	987780000	827210000	842140000
Q96HC4	PDLI5_HUMAN	PDZ and LIM domain protein 5	PDLIM5	233430000	299730000	256280000	328370000	365190000	446720000	545160000	517730000	151570000	156870000	177420000	195420000	118250000	72990000	93615000	62451000
P21964	COMT_HUMAN	Catechol O-methyltransferase	COMT	0	0	0	19282000	37453000	69304000	51852000	30791000	0	0	0	0	0	0	36326000	44602000
P62820	RAB1A_HUMAN	Ras-related protein Rab-1A	RAB1A	107080000	0	96568000	104400000	87437000	137070000	146550000	118110000	334620000	218620000	163180000	263090000	181410000	171640000	312600000	104840000
P04844	RPN2_HUMAN	Dolichyl-diphosphooligosaccharide--protein glycosyltransferase subunit 2	RPN2	437070000	421560000	462410000	464250000	383910000	365370000	333380000	376020000	668520000	1030600000	1312700000	489190000	771080000	865170000	819610000	745340000
P06748	NPM_HUMAN	Nucleophosmin	NPM1	5005400000	3431600000	5056300000	6092700000	2802600000	3824800000	4879900000	4797500000	701250000	580670000	121610000	415960000	255550000	382480000	557130000	418650000
P60866	RS20_HUMAN	40S ribosomal protein S20	RPS20	1356000000	1390500000	1471200000	1601900000	1283900000	1374200000	1527900000	1412100000	1800200000	2076100000	2326500000	1547500000	2198200000	2319700000	1424200000	2119300000
P04181	OAT_HUMAN	Ornithine aminotransferase, mitochondrial	OAT	295190000	378330000	354500000	355030000	216560000	304260000	281370000	267940000	290460000	283970000	436230000	276050000	232740000	255340000	151300000	315650000
P61586	RHOA_HUMAN	Transforming protein RhoA	RHOA	435860000	462480000	329170000	518490000	556000000	495520000	618010000	613750000	822120000	1188900000	1353100000	974650000	1245400000	1297100000	1214900000	1210300000
P27708	PYR1_HUMAN	CAD protein	CAD	1237200000	1212600000	1305600000	1349000000	1270500000	1242400000	1392200000	1288000000	2727000000	2868400000	2824000000	2445400000	3619500000	2615000000	3308900000	2904300000
O15427	MOT4_HUMAN	Monocarboxylate transporter 4	SLC16A3	0	0	0	0	0	0	0	0	0	0	0	0	0	0	21705000	0
O75955	FLOT1_HUMAN	Flotillin-1	FLOT1	160060000	138250000	168530000	131830000	200210000	171510000	182550000	140350000	551920000	459160000	340400000	405340000	605190000	700240000	896480000	658110000
Q969V3	NCLN_HUMAN	Nicalin	NCLN	227680000	176360000	208790000	190620000	233030000	190150000	197770000	177510000	411290000	569140000	693880000	420650000	977130000	959550000	768010000	774180000
Q96N66	MBOA7_HUMAN	Lysophospholipid acyltransferase 7	MBOAT7	0	0	0	0	0	0	0	0	599440000	0	0	577970000	0	0	390600000	100710000
P62910	RL32_HUMAN	60S ribosomal protein L32	RPL32	419050000	382360000	339210000	379660000	332930000	329910000	395960000	366170000	854850000	936800000	872630000	1054100000	213440000	150540000	498880000	205740000
O60716	CTND1_HUMAN	Catenin delta-1	CTNND1	310880000	222700000	289570000	340110000	274130000	351890000	354830000	407340000	1248300000	1122700000	1260200000	1272200000	1662100000	1358000000	1504300000	1374600000
P13987	CD59_HUMAN	CD59 glycoprotein	CD59	0	0	0	0	0	0	0	0	158570000	131200000	177100000	144240000	0	91803000	79228000	47180000
Q13310	PABP4_HUMAN	Polyadenylate-binding protein 4	PABPC4	882150000	1017600000	959300000	960360000	877280000	897770000	759260000	775500000	898560000	1420800000	1407200000	673540000	2013900000	1675400000	1215000000	1638400000
Q9HDC9	APMAP_HUMAN	Adipocyte plasma membrane-associated protein	APMAP	86896000	90135000	120160000	134640000	96155000	136750000	186480000	152070000	742210000	842860000	1169200000	911860000	1874000000	1795800000	1132200000	1107600000
O00425	IF2B3_HUMAN	Insulin-like growth factor 2 mRNA-binding protein 3	IGF2BP3	1379500000	1414700000	1432700000	1444800000	1166200000	1226400000	1203900000	1165400000	2946600000	2920000000	3275300000	2353800000	3895300000	4840700000	4220400000	4611000000
Q6NZI2	CAVN1_HUMAN	Caveolae-associated protein 1	CAVIN1	46144000	0	23654000	38170000	320120000	214880000	240620000	282470000	0	0	0	0	0	0	70645000	15673000
P08240	SRPRA_HUMAN	Signal recognition particle receptor subunit alpha	SRPRA	108240000	100820000	99713000	84384000	46211000	52669000	73696000	72787000	216950000	20820000	0	122690000	0	0	82666000	48452000
Q6PIU2	NCEH1_HUMAN	Neutral cholesterol ester hydrolase 1	NCEH1	0	0	0	0	0	0	0	0	0	0	0	0	0	0	10822000	46490000
Q9UHB6	LIMA1_HUMAN	LIM domain and actin-binding protein 1	LIMA1	267650000	248000000	271190000	360340000	288790000	291790000	432940000	336830000	80922000	17802000	139880000	64944000	64403000	71924000	67758000	75163000
Q9P0L0	VAPA_HUMAN	Vesicle-associated membrane protein-associated protein A	VAPA	79919000	59459000	190060000	144530000	117020000	90082000	151760000	157880000	229870000	219160000	320400000	113040000	387000000	368560000	297260000	528540000
P62829	RL23_HUMAN	60S ribosomal protein L23	RPL23	838040000	873590000	540010000	638790000	703390000	841030000	813040000	844190000	559100000	1139400000	799490000	636350000	1133000000	1116500000	845370000	1139300000
P04040	CATA_HUMAN	Catalase	CAT	24703000	0	0	0	0	0	0	0	276610000	277630000	406980000	249790000	0	0	24920000	9522000
Q9NVI7	ATD3A_HUMAN	ATPase family AAA domain-containing protein 3A	ATAD3A	344900000	308740000	357380000	312400000	363890000	341830000	338290000	319720000	705950000	647070000	754340000	664440000	971290000	1111000000	818600000	925890000
O75352	MPU1_HUMAN	Mannose-P-dolichol utilization defect 1 protein	MPDU1	0	0	0	0	0	0	0	0	784700000	850330000	0	714870000	0	0	0	0
P35613	BASI_HUMAN	Basigin	BSG	828900000	852180000	980870000	1046100000	843220000	737990000	646150000	743360000	5229000000	6262800000	6681300000	4293000000	5130300000	3585600000	3678800000	3146500000
P17844	DDX5_HUMAN	Probable ATP-dependent RNA helicase DDX5	DDX5	2739600000	2772800000	2498900000	2307300000	1983600000	2054100000	2200700000	2252800000	2847700000	2715000000	3076300000	2612900000	2632400000	2945400000	2958400000	2338400000
Q5JRX3	PREP_HUMAN	Presequence protease, mitochondrial	PITRM1	64009000	13142000	12882000	24448000	58286000	43501000	38363000	52177000	0	0	0	0	0	0	5980800	7849600
P46778	RL21_HUMAN	60S ribosomal protein L21	RPL21	1296100000	1032900000	1123600000	1092100000	1205500000	1028900000	1298600000	1387000000	166340000	136070000	146140000	106450000	943800000	1248400000	925710000	1071800000
P00338	LDHA_HUMAN	L-lactate dehydrogenase A chain	LDHA	4380800000	3139200000	2478300000	3446800000	2927900000	2800700000	2906100000	3120700000	473900000	202520000	162710000	348320000	142750000	248840000	434080000	167150000
P21589	5NTD_HUMAN	5'-nucleotidase	NT5E	0	0	0	0	14014000	0	0	0	0	0	0	0	0	0	0	0
P62070	RRAS2_HUMAN	Ras-related protein R-Ras2	RRAS2	206040000	185750000	290650000	243210000	284010000	238240000	261730000	254280000	1779600000	1925700000	896740000	2273300000	900630000	1448500000	2149700000	1327200000
Q9BVK6	TMED9_HUMAN	Transmembrane emp24 domain-containing protein 9	TMED9	111920000	209480000	399490000	232590000	171520000	232540000	178800000	186020000	742560000	864620000	666250000	520540000	663310000	668790000	875870000	621760000
P23396	RS3_HUMAN	40S ribosomal protein S3	RPS3	3729500000	4058000000	4298200000	3622200000	3375900000	3859500000	3522600000	3933100000	4384500000	4610300000	5615700000	4057100000	6339400000	5318700000	5968700000	6889100000
Q10713	MPPA_HUMAN	Mitochondrial-processing peptidase subunit alpha	PMPCA	131570000	105770000	190220000	201710000	147030000	143060000	157170000	148020000	137490000	159150000	172890000	300440000	83406000	0	96596000	68435000
Q9UPN3	MACF1_HUMAN	Microtubule-actin cross-linking factor 1, isoforms 1/2/3/5	MACF1	746710000	941930000	1202000000	720300000	974990000	1110600000	972440000	1106000000	169040000	41789000	73735000	156400000	66391000	63525000	80927000	80130000
Q9H0U3	MAGT1_HUMAN	Magnesium transporter protein 1	MAGT1	69410000	0	93456000	0	0	0	0	0	557700000	460700000	311520000	384290000	381840000	0	299440000	280940000
Q9Y6M1	IF2B2_HUMAN	Insulin-like growth factor 2 mRNA-binding protein 2	IGF2BP2	350520000	219710000	432790000	410090000	588380000	470970000	522140000	538530000	1053400000	994430000	892770000	1219100000	730880000	533470000	1640600000	843910000
Q9UHG3	PCYOX_HUMAN	Prenylcysteine oxidase 1	PCYOX1	135140000	141180000	180470000	185560000	171340000	160140000	182180000	146840000	607040000	589320000	870040000	490110000	869030000	767140000	699570000	619690000
Q9Y4P3	TBL2_HUMAN	Transducin beta-like protein 2	TBL2	51810000	0	27418000	26136000	10787000	28042000	34006000	30152000	295090000	339970000	279090000	477520000	269800000	159420000	286120000	268460000
P62888	RL30_HUMAN	60S ribosomal protein L30	RPL30	857240000	932960000	462200000	840660000	839590000	782220000	995380000	916030000	801190000	1825900000	3462300000	745600000	3466100000	2276700000	2528200000	2726800000
Q05682	CALD1_HUMAN	Caldesmon	CALD1	895520000	665960000	2424200000	1583100000	2251400000	2234700000	5825200000	6283400000	16791000	57779000	40554000	15363000	0	0	33361000	13273000
P36542	ATPG_HUMAN	ATP synthase subunit gamma, mitochondrial	ATP5F1C	667080000	493960000	528760000	505710000	760040000	605050000	537760000	561930000	753440000	797380000	765430000	759420000	894170000	1090600000	994080000	786960000
Q16181	SEPT7_HUMAN	Septin-7	SEPTIN7	273210000	203220000	259800000	321160000	238690000	245410000	283400000	262900000	79444000	131890000	185030000	92200000	73870000	76124000	80018000	42875000
P16435	NCPR_HUMAN	NADPH--cytochrome P450 reductase	POR	208460000	268550000	230840000	239380000	193150000	172180000	194410000	205600000	1091400000	1169200000	862640000	1134800000	679890000	983740000	1413600000	879420000
Q6NUQ4	TM214_HUMAN	Transmembrane protein 214	TMEM214	56019000	48764000	46040000	68166000	30585000	36550000	32393000	38945000	215990000	258800000	189610000	412810000	59116000	99019000	190360000	65807000
P24752	THIL_HUMAN	Acetyl-CoA acetyltransferase, mitochondrial	ACAT1	147850000	150560000	170720000	149920000	184720000	194960000	232430000	220890000	151280000	150330000	170260000	119580000	109300000	54539000	176850000	120280000
P61221	ABCE1_HUMAN	ATP-binding cassette sub-family E member 1	ABCE1	385800000	290980000	397970000	405960000	289810000	342980000	320060000	349130000	617950000	710090000	961200000	659600000	672830000	516910000	679190000	518900000
Q15006	EMC2_HUMAN	ER membrane protein complex subunit 2	EMC2	70963000	98721000	90724000	82983000	107100000	105490000	65022000	63831000	384160000	366530000	447860000	326090000	324620000	459450000	246220000	349130000
P43243	MATR3_HUMAN	Matrin-3	MATR3	1129400000	1218500000	1410900000	1358000000	992300000	955130000	1234300000	1045000000	850020000	571080000	704470000	502450000	1575300000	2259700000	1325200000	2078000000
Q14258	TRI25_HUMAN	E3 ubiquitin/ISG15 ligase TRIM25	TRIM25	73348000	45211000	63920000	93714000	93950000	82827000	86242000	69539000	321620000	381320000	342150000	399670000	258150000	259120000	232650000	275730000
P36776	LONM_HUMAN	Lon protease homolog, mitochondrial	LONP1	239700000	269150000	299760000	291940000	256660000	243890000	333110000	286740000	243630000	271620000	277660000	225410000	172400000	235900000	198040000	169920000
Q6DD88	ATLA3_HUMAN	Atlastin-3	ATL3	29009000	0	59486000	26752000	36126000	30694000	57475000	11704000	125130000	154560000	110120000	119270000	97362000	0	166400000	45174000
Q8NBS9	TXND5_HUMAN	Thioredoxin domain-containing protein 5	TXNDC5	715790000	850810000	604280000	825080000	279770000	389630000	469730000	420910000	946080000	627910000	423360000	1070900000	662300000	621860000	1059400000	480090000
P24539	AT5F1_HUMAN	ATP synthase F(0) complex subunit B1, mitochondrial	ATP5PB	917120000	673440000	648780000	771580000	711570000	762080000	639090000	553730000	3504500000	2411900000	2620500000	3136400000	4756200000	2159100000	3821400000	4338400000
O94826	TOM70_HUMAN	Mitochondrial import receptor subunit TOM70	TOMM70	243700000	199750000	202330000	208360000	205340000	183610000	252790000	188200000	893190000	716880000	900570000	684300000	490780000	592230000	546260000	618210000
P13804	ETFA_HUMAN	Electron transfer flavoprotein subunit alpha, mitochondrial	ETFA	160040000	212720000	137310000	224220000	259600000	206740000	202760000	184610000	334160000	269930000	0	160650000	0	110080000	210940000	76757000
P35580	MYH10_HUMAN	Myosin-10	MYH10	3558400000	3540800000	4230400000	3947300000	3161800000	3014300000	3526100000	3356500000	15507000000	17158000000	16080000000	13515000000	17384000000	18062000000	18922000000	16903000000
P54886	P5CS_HUMAN	Delta-1-pyrroline-5-carboxylate synthase	ALDH18A1	602780000	535850000	853090000	745760000	460290000	462660000	542250000	495830000	89138000	208220000	231730000	145470000	69464000	205080000	272290000	201290000
Q9BTV4	TMM43_HUMAN	Transmembrane protein 43	TMEM43	36995000	64669000	60619000	51599000	62706000	89137000	91197000	56258000	199980000	251130000	328780000	110860000	267240000	335750000	235360000	374470000
Q96HS1	PGAM5_HUMAN	Serine/threonine-protein phosphatase PGAM5, mitochondrial	PGAM5	167580000	163510000	193660000	172140000	154100000	137930000	165440000	158820000	784320000	617550000	627450000	808420000	761560000	736120000	560370000	612550000
P49327	FAS_HUMAN	Fatty acid synthase	FASN	9633300000	8731800000	13459000000	14514000000	8452500000	8866800000	10643000000	11840000000	2405100000	2067800000	2855800000	2200200000	1942500000	1763400000	1728800000	1495500000
Q12904	AIMP1_HUMAN	Aminoacyl tRNA synthase complex-interacting multifunctional protein 1	AIMP1	256460000	221010000	260420000	280950000	225820000	189680000	275260000	223330000	109200000	170990000	205750000	95690000	0	0	61643000	0
Q99613	EIF3C_HUMAN	Eukaryotic translation initiation factor 3 subunit C	EIF3C	843080000	778580000	766320000	759000000	622410000	600070000	726050000	744100000	622790000	654640000	712170000	850170000	606250000	377090000	681630000	539240000
Q99798	ACON_HUMAN	Aconitate hydratase, mitochondrial	ACO2	263840000	221900000	294610000	273480000	262340000	224510000	260360000	265880000	170210000	233020000	203690000	193060000	326520000	339750000	198960000	334540000
Q9UKM9	RALY_HUMAN	RNA-binding protein Raly	RALY	222740000	252810000	218610000	212490000	320200000	191860000	251460000	233570000	572710000	632160000	850790000	572070000	799580000	716750000	1001900000	705650000
P83731	RL24_HUMAN	60S ribosomal protein L24	RPL24	1739400000	1648500000	1057700000	1153100000	1284600000	1081800000	1125100000	1108500000	251730000	1111600000	1682800000	375530000	1944600000	2370200000	1298400000	2301800000
Q96A33	CCD47_HUMAN	PAT complex subunit CCDC47	CCDC47	169870000	148200000	209710000	195720000	108530000	87731000	146910000	175790000	416900000	685030000	864420000	435220000	847790000	1105200000	737530000	606240000
O94808	GFPT2_HUMAN	Glutamine--fructose-6-phosphate aminotransferase [isomerizing] 2	GFPT2	178140000	152420000	204510000	227690000	201030000	178770000	302800000	289900000	299950000	310820000	268970000	177850000	367150000	72193000	292170000	301510000
Q9Y4L1	HYOU1_HUMAN	Hypoxia up-regulated protein 1	HYOU1	1155200000	1209800000	1008300000	1055400000	1183200000	1165700000	1052300000	1141700000	1744400000	1576600000	1857200000	1636900000	2208900000	1663800000	1720300000	1525000000
Q969Q0	RL36L_HUMAN	60S ribosomal protein L36a-like	RPL36AL	0	0	0	0	33741000	34366000	34223000	0	209290000	0	25052000	0	0	0	0	0
O43707	ACTN4_HUMAN	Alpha-actinin-4	ACTN4	2192000000	1699600000	3058400000	3001500000	2802500000	3552100000	3821100000	3977800000	297970000	122320000	110130000	448310000	310280000	359500000	606790000	264990000
Q14152	EIF3A_HUMAN	Eukaryotic translation initiation factor 3 subunit A	EIF3A	1038100000	898200000	1278600000	1092500000	927630000	925470000	1036200000	983360000	613250000	747210000	837520000	529120000	741380000	873030000	738490000	720920000
Q9P2R7	SUCB1_HUMAN	Succinate--CoA ligase [ADP-forming] subunit beta, mitochondrial	SUCLA2	85470000	74645000	93814000	89419000	113810000	111890000	102500000	118350000	146410000	213730000	95346000	110510000	187750000	146500000	115710000	109620000
Q6UB35	C1TM_HUMAN	Monofunctional C1-tetrahydrofolate synthase, mitochondrial	MTHFD1L	173850000	157050000	225330000	241770000	229410000	223220000	265660000	250820000	172620000	191710000	247070000	100510000	192920000	88043000	208110000	104700000
P29966	MARCS_HUMAN	Myristoylated alanine-rich C-kinase substrate	MARCKS	348920000	571270000	384410000	333090000	201220000	564370000	555560000	489860000	2269300000	435990000	102590000	2503100000	42852000	90486000	1299500000	49497000
Q9UKD2	MRT4_HUMAN	mRNA turnover protein 4 homolog	MRTO4	433770000	253210000	380760000	361320000	219450000	219580000	310160000	359880000	686580000	347580000	403540000	642630000	402910000	351560000	557040000	404660000
Q9NTJ5	SAC1_HUMAN	Phosphatidylinositol-3-phosphatase SAC1	SACM1L	249570000	239370000	232430000	238120000	206980000	189880000	182290000	173690000	504210000	646020000	515600000	433380000	870900000	1143300000	938520000	856550000
P61513	RL37A_HUMAN	60S ribosomal protein L37a	RPL37A	129710000	152930000	127250000	280920000	96104000	190440000	212360000	173810000	212460000	392710000	324280000	431800000	512800000	328870000	519310000	347980000
P31943	HNRH1_HUMAN	Heterogeneous nuclear ribonucleoprotein H	HNRNPH1	2417600000	2397200000	3075200000	3192500000	2763900000	2753100000	3132600000	3244600000	1828600000	1813900000	1600600000	1759800000	1995800000	861520000	2220500000	1783500000
Q13409	DC1I2_HUMAN	Cytoplasmic dynein 1 intermediate chain 2	DYNC1I2	197860000	138110000	225500000	296530000	277990000	213930000	255530000	263350000	260360000	275150000	215290000	140940000	53827000	0	208060000	55602000
P10515	ODP2_HUMAN	Dihydrolipoyllysine-residue acetyltransferase component of pyruvate dehydrogenase complex, mitochondrial	DLAT	143290000	194180000	184560000	211170000	138570000	150540000	211610000	139800000	651580000	594550000	635500000	623630000	445290000	423670000	460960000	437440000
Q15084	PDIA6_HUMAN	Protein disulfide-isomerase A6	PDIA6	1513000000	1418400000	1506000000	1356300000	1021000000	1332200000	1263900000	1314700000	632160000	849390000	673510000	644480000	838930000	1345300000	1096700000	894420000
P35232	PHB_HUMAN	Prohibitin	PHB	1087700000	971450000	1088400000	1103600000	1058900000	1141300000	983580000	1226900000	3265700000	2706500000	1973600000	2104600000	1742400000	2081300000	2488000000	2025400000
P41091	IF2G_HUMAN	Eukaryotic translation initiation factor 2 subunit 3	EIF2S3	583200000	878390000	769180000	802460000	707410000	820700000	958320000	982450000	852890000	1484100000	1635500000	1061600000	2270600000	1955000000	1809700000	1483000000
P56381	ATP5E_HUMAN	ATP synthase subunit epsilon, mitochondrial	ATP5F1E	0	0	0	0	0	0	0	0	0	0	0	0	0	0	0	233300000
P07305	H10_HUMAN	Histone H1.0	H1-0	57396000	0	49238000	39980000	0	139600000	129350000	173710000	348560000	491050000	333100000	0	439810000	0	698510000	195230000
P14618	KPYM_HUMAN	Pyruvate kinase PKM	PKM	6279900000	5365200000	4984300000	6183800000	9647200000	8155300000	9175100000	9331800000	492400000	260490000	161210000	393240000	90734000	86103000	276540000	201830000
P50281	MMP14_HUMAN	Matrix metalloproteinase-14	MMP14	44036000	0	16865000	23021000	30692000	20897000	19656000	48820000	195370000	184290000	66811000	135260000	152480000	144950000	184670000	140420000
P61026	RAB10_HUMAN	Ras-related protein Rab-10	RAB10	63739000	150500000	126920000	176890000	124720000	65779000	73332000	64473000	121040000	93311000	199350000	136370000	246520000	350930000	323510000	187810000
P62879	GBB2_HUMAN	Guanine nucleotide-binding protein G(I)/G(S)/G(T) subunit beta-2	GNB2	54620000	541940000	134690000	443620000	513050000	369510000	261700000	318610000	584740000	769000000	754750000	435960000	636310000	597610000	729720000	436870000
P00387	NB5R3_HUMAN	NADH-cytochrome b5 reductase 3	CYB5R3	270520000	311100000	234090000	218400000	298860000	359080000	258130000	307120000	450650000	535740000	641800000	514940000	2174000000	1600900000	1373900000	1314700000
O75643	U520_HUMAN	U5 small nuclear ribonucleoprotein 200 kDa helicase	SNRNP200	730570000	701850000	706090000	843170000	721180000	754530000	797570000	763310000	940420000	988070000	1040600000	785840000	993280000	1085000000	984060000	921710000
Q96S66	CLCC1_HUMAN	Chloride channel CLIC-like protein 1	CLCC1	60627000	0	0	51729000	0	0	33450000	33291000	131500000	0	0	160210000	111590000	122570000	132770000	0
Q02818	NUCB1_HUMAN	Nucleobindin-1	NUCB1	261570000	214130000	144370000	219520000	266660000	206280000	216420000	210810000	0	238040000	52551000	0	0	0	174620000	0
P23634	AT2B4_HUMAN	Plasma membrane calcium-transporting ATPase 4	ATP2B4	44449000	20778000	23747000	20451000	11105000	34759000	28494000	33805000	525090000	152780000	317600000	320570000	149550000	123340000	543050000	213270000
P61106	RAB14_HUMAN	Ras-related protein Rab-14	RAB14	135200000	96438000	182470000	135070000	112610000	133950000	172260000	120450000	150880000	76164000	38224000	167200000	346480000	410340000	466630000	442650000
P36957	ODO2_HUMAN	Dihydrolipoyllysine-residue succinyltransferase component of 2-oxoglutarate dehydrogenase complex, mitochondrial	DLST	90027000	161910000	201380000	166420000	188860000	188970000	199570000	148750000	226620000	212030000	260300000	164870000	813160000	476670000	424260000	394790000
O60832	DKC1_HUMAN	H/ACA ribonucleoprotein complex subunit DKC1	DKC1	169490000	134670000	142520000	213320000	207200000	143350000	202440000	179150000	426690000	391160000	584740000	431930000	467330000	306090000	518980000	256970000
P09874	PARP1_HUMAN	Poly [ADP-ribose] polymerase 1	PARP1	2750800000	2744500000	3260400000	3310000000	2363700000	2069000000	2548100000	2630000000	1896200000	1769500000	2243800000	1741100000	1683400000	2202300000	2355600000	1631500000
Q10472	GALT1_HUMAN	Polypeptide N-acetylgalactosaminyltransferase 1	GALNT1	49275000	95075000	36509000	85766000	77874000	35253000	0	123360000	144320000	0	252980000	120670000	133100000	260510000	116290000	87751000
P33121	ACSL1_HUMAN	Long-chain-fatty-acid--CoA ligase 1	ACSL1	16284000	0	0	149170000	68870000	50499000	41930000	50061000	0	0	0	0	43863000	0	80688000	80304000
Q9BS26	ERP44_HUMAN	Endoplasmic reticulum resident protein 44	ERP44	83517000	0	89067000	62793000	13379000	98715000	129710000	62735000	254690000	335570000	312050000	245240000	330820000	380360000	209270000	273140000
Q03252	LMNB2_HUMAN	Lamin-B2	LMNB2	443760000	404680000	601320000	606220000	460390000	572130000	646980000	628070000	1111800000	1039600000	761560000	980620000	645320000	680000000	725080000	586780000
P31040	SDHA_HUMAN	Succinate dehydrogenase [ubiquinone] flavoprotein subunit, mitochondrial	SDHA	85523000	0	97580000	170350000	122590000	0	126840000	155950000	648690000	322860000	374200000	793110000	451960000	554240000	746040000	550440000
Q9UL25	RAB21_HUMAN	Ras-related protein Rab-21	RAB21	130300000	120370000	84095000	0	174650000	165430000	217010000	165210000	310130000	164510000	119090000	260930000	75194000	74917000	186580000	182420000
Q9BQG0	MBB1A_HUMAN	Myb-binding protein 1A	MYBBP1A	351060000	287690000	291170000	311600000	222180000	180680000	245130000	171200000	618440000	455280000	407800000	356060000	362620000	436770000	611220000	316620000
O43491	E41L2_HUMAN	Band 4.1-like protein 2	EPB41L2	295320000	302120000	326790000	346610000	234780000	214100000	272010000	265960000	905580000	922920000	1317200000	798690000	1159700000	681220000	992960000	1035200000
Q96KC8	DNJC1_HUMAN	DnaJ homolog subfamily C member 1	DNAJC1	0	0	0	31829000	34454000	30501000	30173000	0	0	0	0	0	0	0	0	0
Q99832	TCPH_HUMAN	T-complex protein 1 subunit eta	CCT7	1665800000	1726900000	1714300000	2202200000	1815200000	2039500000	2179000000	2034100000	515880000	391400000	533700000	563160000	397390000	312460000	432210000	324730000
O60763	USO1_HUMAN	General vesicular transport factor p115	USO1	776940000	762590000	1173200000	1122900000	636080000	625020000	692020000	837600000	452580000	167910000	251450000	369310000	59680000	62537000	114460000	0
P43304	GPDM_HUMAN	Glycerol-3-phosphate dehydrogenase, mitochondrial	GPD2	109560000	73605000	128220000	133370000	88414000	85064000	116070000	113360000	589030000	621480000	727870000	466590000	1054200000	1188600000	749690000	1066100000
Q9NYU2	UGGG1_HUMAN	UDP-glucose:glycoprotein glucosyltransferase 1	UGGT1	259200000	273750000	287580000	292400000	243850000	281620000	282110000	239840000	633240000	692940000	788960000	617680000	758090000	827550000	683690000	577740000
Q9BRR6	ADPGK_HUMAN	ADP-dependent glucokinase	ADPGK	145610000	252890000	347800000	0	0	0	0	0	261110000	272210000	0	214320000	0	132020000	139910000	244760000
Q9NP72	RAB18_HUMAN	Ras-related protein Rab-18	RAB18	164130000	181480000	108940000	0	217420000	217450000	201980000	225480000	407450000	435330000	495920000	418510000	496750000	455600000	660010000	628930000
Q02218	ODO1_HUMAN	2-oxoglutarate dehydrogenase, mitochondrial	OGDH	172170000	155940000	130730000	111980000	190350000	180110000	191050000	209370000	96768000	0	129900000	67281000	160090000	177260000	112750000	62857000
O75439	MPPB_HUMAN	Mitochondrial-processing peptidase subunit beta	PMPCB	138020000	164040000	124660000	129440000	172060000	142000000	139730000	113890000	198980000	181620000	223330000	201570000	130000000	95978000	153120000	150600000
Q9NR12	PDLI7_HUMAN	PDZ and LIM domain protein 7	PDLIM7	128850000	108130000	143240000	151860000	361950000	340460000	301010000	431960000	0	0	0	0	0	0	10408000	12711000
P08729	K2C7_HUMAN	Keratin, type II cytoskeletal 7	KRT7	19100000	0	0	0	4018100	0	9984600	0	0	11139000	0	0	87384000	66765000	72908000	42307000
P62861	RS30_HUMAN	40S ribosomal protein S30	FAU	439330000	363050000	429800000	469240000	489030000	473650000	476610000	427230000	0	39789000	0	0	0	58844000	22543000	41181000
P23246	SFPQ_HUMAN	Splicing factor, proline- and glutamine-rich	SFPQ	2892200000	2198200000	2910200000	3443100000	2568600000	2184300000	3811700000	3765800000	3245000000	2756400000	1712600000	2559800000	2804000000	2022500000	4024400000	2758500000
P62851	RS25_HUMAN	40S ribosomal protein S25	RPS25	1509500000	1587300000	1345300000	1399600000	1474400000	1342500000	1253200000	1198300000	794740000	773890000	925250000	626570000	0	721550000	380430000	0
P61803	DAD1_HUMAN	Dolichyl-diphosphooligosaccharide--protein glycosyltransferase subunit DAD1	DAD1	45806000	0	72716000	109010000	53457000	35373000	55447000	37045000	433650000	519890000	519860000	338760000	334520000	261640000	247730000	252940000
O14672	ADA10_HUMAN	Disintegrin and metalloproteinase domain-containing protein 10	ADAM10	50017000	0	64285000	35960000	32152000	13714000	32574000	22013000	302590000	271810000	454510000	242810000	339590000	544960000	438560000	289780000
P07947	YES_HUMAN	Tyrosine-protein kinase Yes	YES1	78485000	0	145420000	0	132380000	65222000	133730000	117380000	271270000	334800000	463360000	285000000	363300000	197960000	313270000	226450000
Q9BSJ8	ESYT1_HUMAN	Extended synaptotagmin-1	ESYT1	464040000	448940000	502730000	470260000	575150000	585640000	607140000	624650000	855680000	706940000	580590000	694220000	1127200000	1226900000	877780000	1168500000
Q8N766	EMC1_HUMAN	ER membrane protein complex subunit 1	EMC1	87589000	83404000	117630000	113760000	85821000	86769000	110790000	109020000	375590000	379180000	372460000	349980000	428010000	341390000	377100000	349530000
Q8NBJ5	GT251_HUMAN	Procollagen galactosyltransferase 1	COLGALT1	44597000	41267000	10376000	34593000	27906000	38200000	58556000	49037000	94159000	93186000	127600000	54762000	109820000	62817000	98406000	104430000
P17302	CXA1_HUMAN	Gap junction alpha-1 protein	GJA1	254430000	245700000	295750000	327220000	168360000	190760000	245520000	237460000	1551500000	1974100000	1926200000	1394900000	655690000	466310000	605270000	519570000
Q9Y6N5	SQOR_HUMAN	Sulfide:quinone oxidoreductase, mitochondrial	SQOR	0	0	0	0	0	0	0	0	0	0	0	0	0	0	19084000	0
Q99714	HCD2_HUMAN	3-hydroxyacyl-CoA dehydrogenase type-2	HSD17B10	165970000	215080000	217270000	190070000	252150000	135420000	224520000	158540000	164270000	52340000	95224000	161890000	138080000	130610000	104670000	88479000
Q5JTV8	TOIP1_HUMAN	Torsin-1A-interacting protein 1	TOR1AIP1	38988000	38618000	35690000	42278000	48596000	49986000	49189000	69579000	73964000	104230000	88324000	139530000	154430000	210570000	101940000	228620000
Q9H3K2	GHITM_HUMAN	Growth hormone-inducible transmembrane protein	GHITM	96868000	107590000	104210000	113860000	144510000	129780000	169690000	174430000	497740000	579930000	475900000	495470000	331760000	281110000	552190000	252140000
Q6P5R6	RL22L_HUMAN	60S ribosomal protein L22-like 1	RPL22L1	188700000	197870000	189020000	201540000	168240000	176070000	192750000	150200000	184390000	0	0	189630000	0	0	242390000	0
P48735	IDHP_HUMAN	Isocitrate dehydrogenase [NADP], mitochondrial	IDH2	199110000	191050000	198480000	183430000	159310000	230500000	185780000	237830000	503240000	580200000	542550000	485090000	375220000	468610000	545090000	377380000
P98194	AT2C1_HUMAN	Calcium-transporting ATPase type 2C member 1	ATP2C1	43092000	55158000	56439000	48090000	56178000	28482000	31945000	0	265990000	114560000	31980000	193550000	62765000	119610000	180070000	95033000
P08962	CD63_HUMAN	CD63 antigen	CD63	45534000	0	54000000	88512000	86328000	88490000	79239000	72087000	0	0	97988000	97523000	142310000	170430000	38590000	73365000
P12956	XRCC6_HUMAN	X-ray repair cross-complementing protein 6	XRCC6	3091000000	3232100000	3423400000	3310400000	3018800000	3466800000	3581300000	3686300000	1984100000	2853700000	3174300000	2177000000	5467100000	7432000000	4545700000	6624200000
P48449	LSS_HUMAN	Lanosterol synthase	LSS	163850000	156440000	190160000	172510000	194630000	219260000	234540000	235280000	389570000	454260000	305990000	307910000	608370000	652420000	554490000	615520000
P35221	CTNA1_HUMAN	Catenin alpha-1	CTNNA1	697430000	448040000	874210000	867320000	962380000	747550000	1022400000	1020700000	2267600000	1346400000	2093600000	1565900000	1776800000	1874900000	2345800000	1916100000
Q9UBM7	DHCR7_HUMAN	7-dehydrocholesterol reductase	DHCR7	426920000	485290000	564030000	481650000	347430000	273600000	316270000	222640000	1157500000	1131400000	1368900000	1296100000	208110000	90864000	764950000	811460000
Q9UHD8	SEPT9_HUMAN	Septin-9	SEPTIN9	660680000	500870000	651240000	586430000	482590000	514530000	582200000	709440000	239860000	245330000	250100000	271860000	80508000	77544000	197270000	103690000
O00567	NOP56_HUMAN	Nucleolar protein 56	NOP56	682640000	735800000	652960000	606120000	472290000	546900000	672340000	664440000	1242800000	1037200000	989840000	1362300000	954220000	1061400000	1256200000	985660000
O95159	ZFPL1_HUMAN	Zinc finger protein-like 1	ZFPL1	20713000	0	43951000	50270000	0	0	46190000	23740000	178590000	138450000	71580000	103170000	47899000	0	227490000	39751000
E9PRG8	CK098_HUMAN	Uncharacterized protein C11orf98	C11orf98	95289000	105720000	89384000	93988000	128490000	78947000	67193000	72184000	0	0	0	0	0	0	0	0
P55809	SCOT1_HUMAN	Succinyl-CoA:3-ketoacid coenzyme A transferase 1, mitochondrial	OXCT1	180000000	178600000	133660000	143080000	208890000	141100000	160860000	215360000	197970000	152540000	214260000	244240000	103760000	0	152460000	115920000
O75251	NDUS7_HUMAN	NADH dehydrogenase [ubiquinone] iron-sulfur protein 7, mitochondrial	NDUFS7	126030000	0	0	0	0	0	0	0	231780000	264480000	307980000	217280000	291760000	0	249730000	165770000
Q9ULV4	COR1C_HUMAN	Coronin-1C	CORO1C	270520000	233950000	227400000	279470000	295550000	418660000	490460000	474590000	56125000	50368000	41769000	63084000	0	0	73950000	120690000
Q13418	ILK_HUMAN	Integrin-linked protein kinase	ILK	79104000	84619000	65497000	72365000	108990000	119730000	105420000	120980000	128190000	156090000	104030000	130990000	0	180270000	163680000	78982000
Q9HCE1	MOV10_HUMAN	Helicase MOV-10	MOV10	123210000	140900000	87134000	82354000	30772000	20502000	39290000	54205000	526530000	279110000	334180000	578800000	527600000	350150000	789360000	437180000
P22307	SCP2_HUMAN	Sterol carrier protein 2	SCP2	181410000	143660000	190320000	245440000	132800000	157220000	214090000	148480000	282540000	329390000	271410000	160790000	66143000	369480000	350210000	237330000
P23786	CPT2_HUMAN	Carnitine O-palmitoyltransferase 2, mitochondrial	CPT2	53141000	41685000	68598000	64996000	76899000	69974000	65407000	81073000	259160000	169270000	162150000	230660000	162600000	210730000	266700000	194000000
Q13263	TIF1B_HUMAN	Transcription intermediary factor 1-beta	TRIM28	2645800000	2661300000	3209900000	3150700000	1892600000	2781300000	2776900000	3353300000	3541600000	4501200000	4711200000	3978700000	7226900000	7563300000	5079500000	6063800000
Q13247	SRSF6_HUMAN	Serine/arginine-rich splicing factor 6	SRSF6	652460000	382050000	0	389780000	386330000	390260000	392820000	451070000	939630000	1166600000	993950000	967070000	852160000	467160000	1268900000	778730000
Q32P28	P3H1_HUMAN	Prolyl 3-hydroxylase 1	P3H1	115070000	55674000	49661000	222370000	119840000	93457000	183560000	191860000	273990000	212550000	95583000	375690000	0	136270000	196900000	94829000
O43143	DHX15_HUMAN	Pre-mRNA-splicing factor ATP-dependent RNA helicase DHX15	DHX15	732960000	955890000	770430000	817770000	729920000	770990000	773660000	790140000	636580000	482770000	766910000	680170000	875770000	754300000	678410000	725930000
Q9Y6C9	MTCH2_HUMAN	Mitochondrial carrier homolog 2	MTCH2	162910000	148600000	166110000	136620000	140460000	191080000	209670000	196000000	743290000	971370000	796800000	653630000	1107600000	1240000000	709830000	829280000
P14866	HNRPL_HUMAN	Heterogeneous nuclear ribonucleoprotein L	HNRNPL	1267800000	1507200000	1742400000	1563100000	1079200000	1158700000	1436200000	1320800000	1624000000	1452000000	692770000	1035700000	2011600000	2715300000	2701800000	2140200000
Q3KQU3	MA7D1_HUMAN	MAP7 domain-containing protein 1	MAP7D1	0	0	0	0	0	0	0	0	0	0	0	0	0	24579000	10196000	0
P26006	ITA3_HUMAN	Integrin alpha-3	ITGA3	12885000	0	0	77070000	80795000	84891000	30392000	83333000	0	0	0	0	0	0	29088000	0
Q15836	VAMP3_HUMAN	Vesicle-associated membrane protein 3	VAMP3	38651000	0	48262000	0	0	0	61371000	57784000	74099000	103010000	0	72331000	0	0	153500000	198400000
P46087	NOP2_HUMAN	Probable 28S rRNA (cytosine(4447)-C(5))-methyltransferase	NOP2	214760000	208600000	199600000	215250000	192240000	161270000	280560000	297800000	529850000	350670000	473010000	581520000	780640000	750890000	674160000	528380000
Q9Y262	EIF3L_HUMAN	Eukaryotic translation initiation factor 3 subunit L	EIF3L	463250000	490950000	417120000	444120000	430860000	369330000	473710000	514350000	554440000	457010000	527950000	561570000	347210000	408870000	456550000	332570000
P60468	SC61B_HUMAN	Protein transport protein Sec61 subunit beta	SEC61B	155190000	121050000	100240000	88655000	0	0	109880000	142850000	1471500000	0	421740000	764030000	0	0	659470000	206980000
P22626	ROA2_HUMAN	Heterogeneous nuclear ribonucleoproteins A2/B1	HNRNPA2B1	4210800000	3614600000	4055900000	4388300000	2867300000	3027700000	3705800000	3030600000	5252600000	6363000000	6863600000	4325600000	4797900000	2318600000	3393900000	3325100000
Q06210	GFPT1_HUMAN	Glutamine--fructose-6-phosphate aminotransferase [isomerizing] 1	GFPT1	522480000	533450000	715500000	825840000	608270000	582590000	777920000	767810000	622330000	669610000	631530000	645720000	654850000	635630000	899640000	529140000
Q14192	FHL2_HUMAN	Four and a half LIM domains protein 2	FHL2	46425000	0	0	0	63324000	44806000	90473000	68952000	0	0	0	0	0	0	34428000	0
P51114	FXR1_HUMAN	Fragile X mental retardation syndrome-related protein 1	FXR1	531310000	521360000	586100000	548430000	503890000	480110000	520400000	464050000	575800000	874850000	782670000	677260000	446720000	285250000	613700000	512610000
P08621	RU17_HUMAN	U1 small nuclear ribonucleoprotein 70 kDa	SNRNP70	528880000	455510000	578640000	594490000	527160000	465900000	521050000	533470000	761510000	955090000	1094500000	715470000	1404200000	1464100000	945710000	703440000
Q9UHN6	CEIP2_HUMAN	Cell surface hyaluronidase	CEMIP2	18447000	0	0	0	0	0	0	0	75527000	0	46797000	41403000	0	0	82061000	50282000
Q04837	SSBP_HUMAN	Single-stranded DNA-binding protein, mitochondrial	SSBP1	456900000	414680000	567440000	485110000	461190000	417130000	501510000	480370000	364910000	493090000	295280000	531350000	767350000	1125300000	510760000	574990000
Q16134	ETFD_HUMAN	Electron transfer flavoprotein-ubiquinone oxidoreductase, mitochondrial	ETFDH	0	0	0	0	0	0	0	0	0	0	0	0	0	0	115790000	101360000
P51148	RAB5C_HUMAN	Ras-related protein Rab-5C	RAB5C	277860000	304830000	306110000	299420000	287200000	267970000	266900000	291780000	379540000	400370000	450160000	294130000	439780000	548120000	503110000	432480000
P53618	COPB_HUMAN	Coatomer subunit beta	COPB1	429680000	301020000	530120000	496020000	373510000	346870000	361530000	362350000	250020000	336190000	341410000	258660000	238000000	235760000	257740000	208940000
P62847	RS24_HUMAN	40S ribosomal protein S24	RPS24	547100000	729080000	610800000	570390000	640700000	803650000	724220000	771010000	324350000	403000000	339760000	477560000	1184300000	1726300000	1090600000	1018100000
Q9H9B4	SFXN1_HUMAN	Sideroflexin-1	SFXN1	74710000	80018000	105280000	111420000	154840000	102990000	108750000	109870000	714090000	938140000	931430000	600070000	1379000000	1394300000	885930000	998080000
P21291	CSRP1_HUMAN	Cysteine and glycine-rich protein 1	CSRP1	69619000	0	78958000	70954000	0	0	0	0	0	0	0	0	0	0	0	0
Q13200	PSMD2_HUMAN	26S proteasome non-ATPase regulatory subunit 2	PSMD2	1325200000	1245200000	1214300000	1441500000	1395700000	1226100000	1663700000	1367800000	717510000	666050000	619380000	607560000	522340000	370130000	499260000	416030000
Q13217	DNJC3_HUMAN	DnaJ homolog subfamily C member 3	DNAJC3	63854000	0	73039000	69873000	48593000	108230000	102260000	64724000	264110000	124970000	152400000	189410000	186550000	146510000	123580000	113650000
P82933	RT09_HUMAN	28S ribosomal protein S9, mitochondrial	MRPS9	103120000	67091000	94801000	107940000	82626000	90197000	102440000	101360000	215730000	220160000	256930000	187240000	274480000	90275000	352460000	232210000
Q7KZF4	SND1_HUMAN	Staphylococcal nuclease domain-containing protein 1	SND1	1223000000	1074100000	1712400000	1745700000	1061600000	918890000	1532400000	1639700000	609840000	537490000	574900000	302550000	358360000	306040000	372710000	348820000
Q15233	NONO_HUMAN	Non-POU domain-containing octamer-binding protein	NONO	1705000000	1861300000	2135700000	2222100000	1746400000	1642600000	2092600000	1801600000	1562900000	1635700000	1986400000	2083400000	1747900000	1472500000	1892800000	2023200000
O60506	HNRPQ_HUMAN	Heterogeneous nuclear ribonucleoprotein Q	SYNCRIP	1511300000	1566900000	1838100000	2298600000	1713400000	1403600000	1810300000	1819100000	2991600000	2041900000	1477300000	1166700000	2626100000	4990800000	4881100000	3859000000
P49792	RBP2_HUMAN	E3 SUMO-protein ligase RanBP2	RANBP2	444980000	403890000	630560000	602420000	439690000	432110000	633210000	569320000	691620000	412700000	291980000	544140000	321270000	379180000	474750000	338240000
O76031	CLPX_HUMAN	ATP-dependent Clp protease ATP-binding subunit clpX-like, mitochondrial	CLPX	126880000	120240000	119780000	107500000	104170000	105120000	116160000	122130000	163580000	155190000	197660000	155220000	129230000	151890000	107460000	124330000
P61163	ACTZ_HUMAN	Alpha-centractin	ACTR1A	122770000	109020000	230350000	186790000	201670000	180260000	191830000	161480000	257860000	290180000	292880000	255050000	451740000	251840000	325510000	322700000
Q9H936	GHC1_HUMAN	Mitochondrial glutamate carrier 1	SLC25A22	53285000	0	67761000	66468000	0	0	63336000	0	199720000	128360000	127940000	140980000	176870000	168260000	193660000	136240000
P46939	UTRN_HUMAN	Utrophin	UTRN	59827000	46659000	72663000	63694000	65935000	61855000	91064000	83365000	336740000	178890000	199100000	161830000	335070000	299820000	309980000	222290000
Q86XL3	ANKL2_HUMAN	Ankyrin repeat and LEM domain-containing protein 2	ANKLE2	17657000	0	0	0	0	15586000	0	0	0	0	0	0	0	0	26425000	0
Q01813	PFKAP_HUMAN	ATP-dependent 6-phosphofructokinase, platelet type	PFKP	647230000	615140000	771570000	818590000	965750000	837460000	1026600000	921640000	361940000	333310000	589440000	547650000	402350000	495910000	792450000	549470000
P26440	IVD_HUMAN	Isovaleryl-CoA dehydrogenase, mitochondrial	IVD	121130000	121110000	144420000	105730000	112930000	99781000	108640000	90066000	82869000	98977000	0	120290000	150070000	0	67125000	55498000
Q99878	H2A1J_HUMAN	Histone H2A type 1-J	H2AC14	1579000000	1599500000	1540000000	1465000000	1692000000	1253600000	1324900000	1329600000	4256200000	6663200000	7452100000	3589600000	5902200000	4843800000	3089500000	5006800000
A0FGR8	ESYT2_HUMAN	Extended synaptotagmin-2	ESYT2	27123000	32058000	29211000	0	66419000	61658000	59987000	50411000	187860000	260370000	193160000	138530000	601270000	486010000	759410000	812040000
Q07666	KHDR1_HUMAN	KH domain-containing, RNA-binding, signal transduction-associated protein 1	KHDRBS1	319110000	449760000	340400000	218690000	101380000	122860000	184650000	276600000	339230000	95360000	29616000	266230000	36398000	0	244020000	97683000
Q9NUQ6	SPS2L_HUMAN	SPATS2-like protein	SPATS2L	135980000	118640000	156330000	259550000	137850000	146160000	170970000	147120000	69304000	70460000	73852000	0	0	0	32128000	0
Q99848	EBP2_HUMAN	Probable rRNA-processing protein EBP2	EBNA1BP2	78306000	75384000	76924000	80497000	68347000	61261000	57415000	58071000	253240000	256970000	311950000	173150000	230620000	219980000	105150000	119990000
P35222	CTNB1_HUMAN	Catenin beta-1	CTNNB1	304680000	334110000	320210000	454160000	348410000	382560000	375950000	439480000	1170900000	843270000	754020000	624940000	1003900000	1015800000	1227100000	951040000
Q9NZ01	TECR_HUMAN	Very-long-chain enoyl-CoA reductase	TECR	204930000	202750000	190530000	95109000	195130000	45999000	76917000	74859000	780220000	648420000	313950000	657210000	519580000	523300000	1123800000	504500000
Q9Y5S2	MRCKB_HUMAN	Serine/threonine-protein kinase MRCK beta	CDC42BPB	44177000	42073000	40571000	24484000	22705000	18023000	12523000	38841000	76085000	30072000	0	18321000	25219000	69205000	79953000	58340000
P49821	NDUV1_HUMAN	NADH dehydrogenase [ubiquinone] flavoprotein 1, mitochondrial	NDUFV1	116880000	111510000	81144000	90675000	97150000	111700000	70754000	83656000	304750000	264700000	343300000	299640000	547850000	456110000	385930000	414610000
P08754	GNAI3_HUMAN	Guanine nucleotide-binding protein G(i) subunit alpha-3	GNAI3	32399000	64980000	29420000	29468000	73661000	29834000	77881000	120790000	462860000	634550000	163790000	470870000	99692000	30540000	592410000	32313000
P18583	SON_HUMAN	Protein SON	SON	98969000	97447000	125040000	133750000	97880000	95165000	124300000	130980000	686870000	556260000	250070000	811610000	78109000	0	464040000	81891000
Q96PD2	DCBD2_HUMAN	Discoidin, CUB and LCCL domain-containing protein 2	DCBLD2	0	0	0	0	0	0	0	0	0	0	0	0	0	0	54201000	0
P13639	EF2_HUMAN	Elongation factor 2	EEF2	10912000000	9813300000	12446000000	10961000000	10308000000	10554000000	12027000000	10876000000	1581000000	1740600000	1454000000	1440500000	699000000	1024800000	1040700000	1121200000
Q13740	CD166_HUMAN	CD166 antigen	ALCAM	42266000	34457000	63206000	63777000	110070000	109250000	107080000	109810000	102200000	119480000	141460000	100770000	0	50125000	103360000	116670000
Q9P0J0	NDUAD_HUMAN	NADH dehydrogenase [ubiquinone] 1 alpha subcomplex subunit 13	NDUFA13	140850000	146500000	173780000	75064000	100380000	36030000	94748000	114870000	347550000	110580000	0	332200000	300430000	241130000	692810000	511330000
P53597	SUCA_HUMAN	Succinate--CoA ligase [ADP/GDP-forming] subunit alpha, mitochondrial	SUCLG1	86333000	85462000	72381000	115350000	124610000	99286000	239180000	261030000	72889000	0	0	0	0	0	46536000	42328000
Q8TCJ2	STT3B_HUMAN	Dolichyl-diphosphooligosaccharide--protein glycosyltransferase subunit STT3B	STT3B	150710000	91221000	145990000	138190000	126240000	124260000	161660000	159130000	406700000	276520000	391170000	620330000	308440000	511320000	725140000	632770000
Q9Y394	DHRS7_HUMAN	Dehydrogenase/reductase SDR family member 7	DHRS7	0	0	0	0	169070000	92082000	105490000	0	142010000	132590000	149860000	135870000	204500000	198700000	170390000	179180000
P10301	RRAS_HUMAN	Ras-related protein R-Ras	RRAS	20079000	0	33816000	29671000	8934900	7402100	13547000	13592000	0	0	0	0	39074000	0	56833000	0
P68363	TBA1B_HUMAN	Tubulin alpha-1B chain	TUBA1B	1009300000	855070000	580840000	1317100000	873510000	626700000	1053700000	1475300000	951600000	1079200000	123290000	403080000	853520000	3671300000	2710700000	1685300000
P48444	COPD_HUMAN	Coatomer subunit delta	ARCN1	463620000	326240000	381710000	369370000	254680000	392060000	340440000	252670000	188750000	172550000	37625000	158250000	94714000	129790000	117070000	85754000
P13674	P4HA1_HUMAN	Prolyl 4-hydroxylase subunit alpha-1	P4HA1	70599000	7036400	115130000	93696000	72749000	74067000	67954000	94239000	70836000	32792000	99365000	103020000	216430000	235440000	170090000	174380000
P60228	EIF3E_HUMAN	Eukaryotic translation initiation factor 3 subunit E	EIF3E	602970000	654150000	605840000	565950000	503320000	515460000	637530000	760400000	736270000	647870000	685920000	434060000	446910000	503340000	480820000	462200000
P10620	MGST1_HUMAN	Microsomal glutathione S-transferase 1	MGST1	618140000	410910000	831500000	523690000	359140000	474710000	377020000	295000000	184620000	204150000	125090000	166940000	422790000	1124600000	649700000	573650000
Q9BYC5	FUT8_HUMAN	Alpha-(1,6)-fucosyltransferase	FUT8	0	0	0	0	0	0	0	0	0	94692000	97763000	0	0	0	39641000	35044000
Q00765	REEP5_HUMAN	Receptor expression-enhancing protein 5	REEP5	102440000	103700000	69282000	87591000	65229000	73193000	68059000	61325000	0	132750000	55210000	0	52070000	0	0	0
Q9BWM7	SFXN3_HUMAN	Sideroflexin-3	SFXN3	177580000	0	0	0	144030000	0	130150000	0	0	0	0	0	0	0	198410000	0
O15260	SURF4_HUMAN	Surfeit locus protein 4	SURF4	184620000	226920000	185620000	149750000	98927000	154880000	144120000	187240000	674770000	704740000	362000000	590190000	165310000	513560000	782520000	314410000
Q53Z42	Q53Z42_HUMAN	NA	HLA-A	0	0	55422000	0	0	37687000	62901000	72565000	0	0	0	184520000	247240000	275410000	551840000	451130000
Q15046	SYK_HUMAN	Lysine--tRNA ligase	KARS1	641550000	482150000	732240000	685340000	514610000	614440000	795350000	709270000	262930000	203490000	95223000	332300000	85861000	114910000	240600000	56783000
P51571	SSRD_HUMAN	Translocon-associated protein subunit delta	SSR4	176130000	139200000	171620000	183890000	110910000	146900000	159520000	176000000	212690000	114090000	98691000	120420000	515920000	890680000	618870000	675940000
Q8IY81	SPB1_HUMAN	pre-rRNA 2'-O-ribose RNA methyltransferase FTSJ3	FTSJ3	95973000	140090000	161070000	176350000	97093000	94140000	133930000	132200000	108420000	69856000	93686000	86286000	25990000	0	46106000	20101000
P11177	ODPB_HUMAN	Pyruvate dehydrogenase E1 component subunit beta, mitochondrial	PDHB	351030000	320110000	311750000	363830000	429780000	379110000	424160000	458170000	782840000	1117900000	1246900000	930000000	966940000	916680000	727620000	681110000
Q9H4G4	GAPR1_HUMAN	Golgi-associated plant pathogenesis-related protein 1	GLIPR2	0	0	0	0	0	0	0	71975000	43369000	0	0	48343000	0	0	66476000	160270000
P37108	SRP14_HUMAN	Signal recognition particle 14 kDa protein	SRP14	660470000	444910000	382520000	544960000	403430000	506420000	435800000	497690000	225040000	323530000	127690000	162010000	532550000	827170000	1431700000	806350000
P18031	PTN1_HUMAN	Tyrosine-protein phosphatase non-receptor type 1	PTPN1	135490000	65639000	132800000	124340000	100850000	108570000	111340000	119480000	18515000	13668000	0	13968000	0	65778000	75923000	91672000
P56192	SYMC_HUMAN	Methionine--tRNA ligase, cytoplasmic	MARS1	389580000	431430000	478260000	558220000	346290000	383300000	435840000	450410000	463240000	390040000	367010000	521080000	344320000	516870000	422620000	441030000
O96005	CLPT1_HUMAN	Cleft lip and palate transmembrane protein 1	CLPTM1	46368000	0	0	0	0	0	0	0	148140000	116340000	138050000	143170000	138010000	198960000	158250000	144950000
O75844	FACE1_HUMAN	CAAX prenyl protease 1 homolog	ZMPSTE24	127390000	69654000	86925000	93764000	72370000	79763000	52463000	48359000	189390000	260090000	226640000	199410000	166630000	298780000	241270000	178530000
P78371	TCPB_HUMAN	T-complex protein 1 subunit beta	CCT2	2413200000	2496400000	3269000000	3121400000	2657800000	2387600000	2942500000	3388100000	376280000	316450000	280810000	288000000	201490000	145380000	269640000	162980000
P61604	CH10_HUMAN	10 kDa heat shock protein, mitochondrial	HSPE1	2252300000	1695700000	2048700000	2302800000	2017700000	2146500000	2298000000	2337500000	364100000	336660000	503150000	344540000	360500000	278590000	210400000	285110000
Q14108	SCRB2_HUMAN	Lysosome membrane protein 2	SCARB2	56834000	0	67103000	0	31435000	33008000	0	154010000	88356000	141420000	258390000	112650000	260790000	211650000	168220000	235510000
Q5TEC6	H3PS2_HUMAN	Histone HIST2H3PS2	H3-2	598520000	621670000	468320000	491590000	1103200000	604350000	534580000	711180000	2432100000	2631500000	3126600000	2492100000	0	0	2264100000	0
P08708	RS17_HUMAN	40S ribosomal protein S17	RPS17	1294600000	1059200000	944300000	1036200000	781390000	934370000	1025000000	1070500000	1096800000	757210000	650900000	566800000	1881400000	2020300000	1179100000	1291500000
G5E9E7	G5E9E7_HUMAN	NA	TJP1	222000000	241700000	298280000	323180000	265390000	339480000	361330000	402300000	502950000	510240000	468790000	563950000	423720000	341040000	723110000	458470000
P05362	ICAM1_HUMAN	Intercellular adhesion molecule 1	ICAM1	0	0	0	0	0	0	0	0	0	0	0	0	0	0	32743000	0
D9J307	D9J307_HUMAN	NA	HLA-B	0	0	0	0	0	0	0	0	93829000	0	0	95507000	0	0	56893000	168530000
P52926	HMGA2_HUMAN	High mobility group protein HMGI-C	HMGA2	252350000	225200000	182270000	162920000	332450000	286350000	211450000	182600000	656450000	0	0	738610000	0	0	363540000	0
Q92769	HDAC2_HUMAN	Histone deacetylase 2	HDAC2	460120000	488270000	447390000	443990000	316670000	353270000	330590000	349380000	394490000	369460000	0	329170000	0	128220000	236090000	127850000
P26641	EF1G_HUMAN	Elongation factor 1-gamma	EEF1G	1638000000	1247700000	1594300000	1856100000	1472200000	1373400000	1760000000	1752900000	253790000	181730000	217780000	192170000	227370000	112030000	160250000	152080000
Q13347	EIF3I_HUMAN	Eukaryotic translation initiation factor 3 subunit I	EIF3I	452610000	497830000	679870000	807730000	429310000	645000000	661980000	575360000	185340000	503210000	393570000	285190000	290560000	374190000	328650000	217970000
Q12931	TRAP1_HUMAN	Heat shock protein 75 kDa, mitochondrial	TRAP1	754780000	712390000	869010000	835260000	589210000	713170000	659810000	785580000	428760000	380170000	453550000	215200000	361460000	368480000	355760000	404780000
Q16698	DECR_HUMAN	2,4-dienoyl-CoA reductase [(3E)-enoyl-CoA-producing], mitochondrial	DECR1	59498000	52114000	68938000	86640000	72728000	57935000	72463000	82394000	63001000	60425000	0	0	54069000	58446000	49532000	39853000
P35555	FBN1_HUMAN	Fibrillin-1	FBN1	0	0	0	0	0	0	0	0	0	0	33033000	0	0	0	0	0
Q15436	SC23A_HUMAN	Protein transport protein Sec23A	SEC23A	94961000	95513000	106750000	89056000	77958000	139260000	76573000	130890000	87862000	40628000	0	36204000	0	35313000	33798000	14970000
O60313	OPA1_HUMAN	Dynamin-like 120 kDa protein, mitochondrial	OPA1	143900000	121470000	153770000	142460000	189170000	148860000	146250000	152800000	229190000	219870000	251090000	329980000	621090000	611720000	756820000	797410000
Q9NRY6	PLS3_HUMAN	Phospholipid scramblase 3	PLSCR3	0	0	0	0	0	0	0	0	96128000	102970000	0	0	52510000	0	69240000	64852000
O95573	ACSL3_HUMAN	Long-chain-fatty-acid--CoA ligase 3	ACSL3	293280000	293270000	361690000	279150000	393520000	272960000	283520000	239660000	852070000	449440000	309110000	644120000	534590000	387480000	1036900000	658160000
Q9UHB9	SRP68_HUMAN	Signal recognition particle subunit SRP68	SRP68	159630000	188440000	135410000	130510000	115210000	129550000	176660000	205370000	337780000	216370000	207810000	338520000	173300000	109220000	206390000	140070000
Q02978	M2OM_HUMAN	Mitochondrial 2-oxoglutarate/malate carrier protein	SLC25A11	337640000	267110000	281480000	344890000	276570000	232250000	276570000	251080000	1217300000	2548300000	1559000000	1954000000	1518700000	799790000	1294500000	1410000000
P05455	LA_HUMAN	Lupus La protein	SSB	820680000	706520000	1283800000	1478700000	865560000	688050000	868110000	611080000	586260000	809370000	729570000	590650000	418060000	323860000	355300000	120700000
P61019	RAB2A_HUMAN	Ras-related protein Rab-2A	RAB2A	251370000	221100000	222380000	259510000	249990000	249550000	238430000	252860000	496990000	340200000	231480000	406220000	745030000	1076400000	820410000	760860000
Q9UG63	ABCF2_HUMAN	ATP-binding cassette sub-family F member 2	ABCF2	125490000	164130000	162000000	148030000	147570000	111670000	134010000	133950000	220740000	191120000	201610000	158410000	79849000	115900000	176990000	76846000
Q9UHQ9	NB5R1_HUMAN	NADH-cytochrome b5 reductase 1	CYB5R1	12178000	0	0	0	0	0	0	0	50820000	56029000	72957000	53963000	108920000	88387000	44834000	70376000
Q9NSE4	SYIM_HUMAN	Isoleucine--tRNA ligase, mitochondrial	IARS2	57201000	49086000	81354000	69667000	76562000	55489000	90979000	83581000	210630000	161510000	203760000	136660000	92861000	82391000	99566000	74049000
O15231	ZN185_HUMAN	Zinc finger protein 185	ZNF185	0	13827000	0	0	0	0	0	0	0	0	0	0	0	0	0	11759000
Q9NVJ2	ARL8B_HUMAN	ADP-ribosylation factor-like protein 8B	ARL8B	102380000	47877000	121760000	52554000	100880000	68345000	63789000	73233000	150600000	76727000	145080000	120960000	152480000	166640000	94129000	117410000
Q9Y5B9	SP16H_HUMAN	FACT complex subunit SPT16	SUPT16H	792710000	751090000	959040000	869940000	672640000	699180000	696340000	651590000	939400000	1048000000	1697200000	1109500000	621710000	604140000	1133500000	826050000
O75947	ATP5H_HUMAN	ATP synthase subunit d, mitochondrial	ATP5PD	222320000	184680000	139130000	171210000	193180000	200210000	218540000	232070000	256560000	347260000	325250000	348140000	229820000	0	213880000	127140000
Q14247	SRC8_HUMAN	Src substrate cortactin	CTTN	512820000	516770000	567100000	705110000	788780000	569500000	771810000	826880000	0	0	0	0	0	0	22071000	0
Q15717	ELAV1_HUMAN	ELAV-like protein 1	ELAVL1	569540000	615880000	545070000	419940000	486660000	486600000	544730000	572920000	916210000	880940000	891040000	502560000	577480000	747820000	567030000	617210000
Q9UM00	TMCO1_HUMAN	Calcium load-activated calcium channel	TMCO1	0	0	0	0	0	0	0	0	121390000	129160000	0	0	126120000	193690000	73504000	119190000
Q8TB61	S35B2_HUMAN	Adenosine 3'-phospho 5'-phosphosulfate transporter 1	SLC35B2	17152000	0	0	0	0	0	0	0	147800000	92219000	0	91704000	192470000	105890000	120970000	123120000
Q9UIJ7	KAD3_HUMAN	GTP:AMP phosphotransferase AK3, mitochondrial	AK3	83791000	0	52309000	64163000	62664000	102440000	62571000	48458000	0	0	0	0	0	0	0	24657000
P02452	CO1A1_HUMAN	Collagen alpha-1(I) chain	COL1A1	0	0	0	0	10916000	19453000	14005000	13986000	0	0	27728000	52327000	85939000	0	0	24535000
P62140	PP1B_HUMAN	Serine/threonine-protein phosphatase PP1-beta catalytic subunit	PPP1CB	252560000	277110000	219890000	272620000	295370000	271660000	385510000	324600000	92841000	203990000	235220000	122180000	198780000	254880000	229830000	274340000
Q9BXJ9	NAA15_HUMAN	N-alpha-acetyltransferase 15, NatA auxiliary subunit	NAA15	389880000	350610000	525780000	604310000	450650000	389750000	524530000	440040000	186340000	345680000	404440000	181810000	286390000	102040000	241110000	197960000
P08648	ITA5_HUMAN	Integrin alpha-5	ITGA5	0	0	0	25275000	28503000	71328000	0	80557000	0	0	0	0	0	0	10712000	9713900
Q9Y6G9	DC1L1_HUMAN	Cytoplasmic dynein 1 light intermediate chain 1	DYNC1LI1	130780000	89155000	143140000	76841000	76927000	83944000	88770000	114610000	205520000	270420000	0	264370000	101040000	0	100730000	114900000
P29317	EPHA2_HUMAN	Ephrin type-A receptor 2	EPHA2	23192000	0	0	0	18433000	0	26112000	0	0	34713000	0	48431000	56011000	44263000	84809000	11694000
Q14254	FLOT2_HUMAN	Flotillin-2	FLOT2	81674000	44169000	36156000	44083000	70080000	76240000	72257000	79482000	420490000	245710000	247430000	246740000	275380000	536960000	463350000	411450000
P54289	CA2D1_HUMAN	Voltage-dependent calcium channel subunit alpha-2/delta-1	CACNA2D1	10568000	13639000	15609000	13690000	18169000	34354000	25027000	25265000	222090000	162310000	80606000	173140000	92461000	52613000	168120000	83428000
P23528	COF1_HUMAN	Cofilin-1	CFL1	3477400000	3629500000	3714600000	4314900000	4054400000	3430000000	4404200000	4629200000	686770000	828360000	716040000	458190000	469640000	285980000	360870000	249850000
Q5T4S7	UBR4_HUMAN	E3 ubiquitin-protein ligase UBR4	UBR4	433230000	586150000	670760000	710130000	494380000	446090000	526980000	514330000	569600000	535160000	531780000	616700000	286150000	229180000	453050000	294500000
Q9BQ39	DDX50_HUMAN	ATP-dependent RNA helicase DDX50	DDX50	56942000	70964000	57841000	66042000	56737000	54612000	81290000	67272000	395240000	431980000	504210000	322490000	260900000	306350000	374120000	119860000
Q9HCU5	PREB_HUMAN	Prolactin regulatory element-binding protein	PREB	17852000	0	29507000	22760000	17649000	16687000	16055000	17178000	154720000	186140000	189030000	73383000	0	221620000	83914000	150810000
Q13586	STIM1_HUMAN	Stromal interaction molecule 1	STIM1	11917000	0	0	0	9570400	8063100	0	8105700	0	0	14803000	0	23316000	16972000	26536000	30701000
[truncated: 4,284 more rows]

## Sheet: Table S4
Supplementary Table S4 - Proteomic distribution analysis of iPSC and NVs
[truncated: 3,499 more rows]

## Sheet: Table S5
Supplementary Table S5 - iPSC NV-treated cardiomyocyte proteome analysis
[truncated: 4,688 more rows]

[truncated: 3 more sheets: Table S6, Table S7, Table S8]
